# Supplementary material for: Longitudinal and large-scale monitoring of transcriptome and RBP-RNA interactome in living cells by engineered protein nanocages
Source: Research Square preprint supplement (doi:10.21203/rs.3.rs-6053638/v1), 2025-03-26
Supplement: Supplementary file 1 [file 864b494c60443489b3d3547e.xlsx]

## Sheet: Legends
Supplementary Table 2	POND-seq enrichment analysis results, related to Figs.1-4.
Fig.1c	EPN24-SLBP versus EPN24-GFP enrichment analysis results in HEK293T
Fig.1d	EPN24-IGF2BP1 versus EPN24-GFP enrichment analysis results in HEK293T
Supplementary Fig.1c,d	Enrichment analysis of EPN24-IGF2BP1 versus EPN24-GFP with and without rRNA depletion in HEK293T
Supplementary Fig.1e,f	Enrichment analysis of EPN24-IGF2BP1 versus EPN24-GFP and versus EPN24 in HEK293T
Fig.1g	Two independent batches of EPN24-IGF2BP1 versus EPN24-GFP enrichment analysis results in HEK293T
Fig.1h	EPN24-FMR1/TIA1/YTHDF2 versus EPN24 enrichment analysis results in HEK293T
Supplementary Fig.1j	EPN24-G3BP1/PUM2 versus EPN24-GFP enrichment analysis results in HEK293T
Supplementary Fig.1l	EPN24-LIN28A versus EPN24-GFP enrichment analysis results in hESC and mESC
Fig.2e	PABPC1-POND-seq driven by liver promoter data for A549/Huh-7 mix cells
Fig.2g,h	PABPC1-POND-seq and cell lysate RNA-seq TPM in HEK293T cells after treating with TNFα and recovering
Fig.3a & Supplementary Fig.3b	IGF2BP1 wild type, ΔKH1/2, and ΔKH3/4 POND-seq enrichment results
Fig.3d & Supplementary Fig.3d	YTHDF2 wild type, K416A, and R527A POND-seq enrichment results
Fig.4e,f & Supplementary Fig.4e	FMR1 G266E, E280K, P289L, and I304N POND-seq enrichment results
Fig.4g	FMR1 wild type, G266E, E280K, P289L, and I304N POND-seq CPM (normalized to ERCC spike-in)

## Sheet: Fig.1c
EPN24-SLBP versus EPN24-GFP enrichment analysis results in HEK293T, related to Fig.1c
gene_id	gene_symbol	EPN24-SLBP_TPM	EPN24-SLBPvsEPN24-GFP_log2FoldChange	EPN24-SLBPvsEPN24-GFP_pvalue	EPN24-SLBPvsEPN24-GFP_padj
ENSG00000197061.5	H4C3	30458	5.11847	8.60823e-21	1.85895e-17
ENSG00000168298.7	H1-4	27224	4.29239	6.66344e-28	2.87794e-24
ENSG00000277157.2	H4C4	22854.5	4.88777	1.4121e-19	2.43954e-16
ENSG00000187837.4	H1-2	22812.1	4.58952	5.61938e-26	1.61801e-22
ENSG00000286522.2	H3C2	17081.3	4.03127	3.0819e-17	4.43691e-14
ENSG00000276966.3	H4C5	16189.1	4.78097	4.23701e-16	4.06658e-13
ENSG00000197903.8	H2BC12	16086.5	3.53875	5.12216e-11	2.32869e-08
ENSG00000278705.3	H4C2	10328.2	3.47191	1.05869e-09	3.97606e-07
ENSG00000196787.4	H2AC11	8067.7	3.84219	9.89337e-10	3.8845e-07
ENSG00000274997.2	H2AC12	6831.77	5.76153	1.35522e-11	7.87021e-09
ENSG00000284803.1	ENSG00000284803	5968.85	2.56639	5.17783e-05	0.00299727
ENSG00000122026.11	RPL21	4570.5	4.20453	5.54942e-17	6.01453e-14
ENSG00000196747.5	H2AC13	4480.18	3.87316	3.91332e-08	1.02434e-05
ENSG00000275221.2	H2AC15	4266	4.70658	9.529e-07	0.000146985
ENSG00000180596.8	H2BC4	3773.01	4.3104	5.02994e-08	1.25951e-05
ENSG00000137154.13	RPS6	3603	3.17851	9.29898e-16	8.03246e-13
ENSG00000105372.8	RPS19	3022.87	4.37248	5.5703e-17	6.01453e-14
ENSG00000124635.9	H2BC11	2991.79	3.91035	1.30042e-08	4.01181e-06
ENSG00000177954.14	RPS27	2926.46	2.46221	6.27624e-05	0.00347526
ENSG00000184260.6	H2AC20	2813.12	2.91476	0.000240084	0.00843025
ENSG00000278828.2	H3C10	2779.25	4.94453	1.35312e-11	7.87021e-09
ENSG00000112306.8	RPS12	2751.41	2.25793	0.00111325	0.0196652
ENSG00000183598.4	H3C13	2700.96	4.18498	2.84007e-05	0.00197621
ENSG00000168028.14	RPSA	2484.56	2.39309	4.71143e-10	1.93797e-07
ENSG00000148303.17	RPL7A	2385.96	2.68165	8.4534e-09	2.70446e-06
ENSG00000274641.2	H2BC17	2210.67	3.50212	0.000198368	0.00768387
ENSG00000215472.10	RPL17-C18orf32	2142.07	4.66859	1.44357e-11	7.87021e-09
ENSG00000260342.2	ENSG00000260342	2139.32	2.95944	3.92359e-06	0.000456619
ENSG00000203814.7	H2BC18	1992.42	3.64438	8.61572e-08	1.95849e-05
ENSG00000143947.15	RPS27A	1976.85	3.66317	2.4717e-11	1.25562e-08
ENSG00000158373.9	H2BC5	1944.72	3.40664	4.61228e-05	0.00277597
ENSG00000185130.6	H2BC13	1913.39	3.90208	0.000121268	0.00545189
ENSG00000278677.2	H2AC17	1832.05	4.28403	5.2395e-05	0.00299727
ENSG00000275714.2	H3C1	1809.12	2.74448	0.00430892	0.0376224
ENSG00000231500.7	RPS18	1776.93	2.03126	3.50786e-05	0.00229552
ENSG00000145425.10	RPS3A	1769.07	3.12044	6.78624e-12	4.88496e-09
ENSG00000188486.4	H2AX	1763.23	6.36776	1.56681e-08	4.51137e-06
ENSG00000136942.15	RPL35	1752.6	3.02762	5.69679e-07	9.6488e-05
ENSG00000197153.5	H3C12	1708.88	3.78791	1.48133e-06	0.000199933
ENSG00000276903.2	H2AC16	1642.08	2.80058	0.00664723	0.046673
ENSG00000142937.12	RPS8	1473.17	2.53483	5.63765e-08	1.35272e-05
ENSG00000131469.15	RPL27	1464.02	2.29032	2.4199e-05	0.00177772
ENSG00000198755.11	RPL10A	1405.89	2.64949	9.43746e-06	0.000895833
ENSG00000124575.7	H1-3	1390.28	4.53462	3.25174e-05	0.00216065
ENSG00000265681.8	RPL17	1339.84	4.67013	1.45778e-11	7.87021e-09
ENSG00000142541.18	RPL13A	1325.46	2.09245	4.40318e-06	0.000498528
ENSG00000089009.16	RPL6	1259.89	2.89893	2.61648e-11	1.25562e-08
ENSG00000122406.14	RPL5	1253.82	2.01149	7.12924e-07	0.000116193
ENSG00000108298.12	RPL19	1223.15	2.33219	1.5067e-06	0.000200229
ENSG00000240342.3	RPS2P5	1155.7	2.0919	0.00583736	0.0438462
ENSG00000147604.14	RPL7	1149.51	2.49413	2.72966e-08	7.60608e-06
ENSG00000089157.16	RPLP0	1126.82	2.54236	1.26369e-06	0.000188202
ENSG00000180573.10	H2AC6	1001.53	4.85691	1.42483e-06	0.000198511
ENSG00000167526.14	RPL13	981.899	2.22878	1.76019e-06	0.000230372
ENSG00000184678.11	H2BC21	949.474	3.35358	3.62128e-05	0.00233437
ENSG00000177600.9	RPLP2	945.381	3.03225	0.00011944	0.00543013
ENSG00000114391.13	RPL24	916.069	2.48243	5.38814e-06	0.000589149
ENSG00000260836.2	ENSG00000260836	911.268	2.63665	2.0534e-05	0.00161248
ENSG00000278463.2	H2AC4	845.706	4.26379	0.00244363	0.0290345
ENSG00000196866.3	H2AC7	826.432	3.58266	0.00508413	0.0407938
ENSG00000158406.6	H4C8	764.874	5.17485	3.29553e-07	6.46973e-05
ENSG00000285625.1	ENSG00000285625	750.78	2.41501	0.00343712	0.0337384
ENSG00000130255.13	RPL36	737.288	3.25389	1.21493e-05	0.00107087
ENSG00000114942.14	EEF1B2	736.125	2.4733	8.20759e-06	0.00080565
ENSG00000171863.15	RPS7	716.584	2.42931	9.64177e-08	2.13553e-05
ENSG00000147403.18	RPL10	674.586	2.00084	2.15033e-05	0.00162934
ENSG00000233927.5	RPS28	642.227	2.88005	0.00118987	0.0203125
ENSG00000063177.13	RPL18	638.925	2.96839	4.46144e-07	8.02874e-05
ENSG00000182774.13	RPS17	634.53	2.63654	1.49139e-05	0.00125579
ENSG00000189060.6	H1-0	578.755	3.06893	2.26147e-06	0.000283109
ENSG00000146731.11	CCT6A	557.035	3.37727	2.65746e-09	8.82888e-07
ENSG00000125691.14	RPL23	541.347	2.33538	3.77279e-06	0.000446429
ENSG00000174748.22	RPL15	537.07	2.27798	1.19661e-07	2.58408e-05
ENSG00000182899.17	RPL35A	537.02	2.48361	0.000317005	0.00975437
ENSG00000124614.16	RPS10	534.425	2.23332	0.000385627	0.0106934
ENSG00000181218.6	H2AW	521.287	5.37924	0.000104306	0.00500554
ENSG00000165502.7	RPL36AL	475.151	4.79936	0.00483027	0.0400416
ENSG00000115128.7	SF3B6	449.441	2.65412	0.00297776	0.0319924
ENSG00000123562.18	MORF4L2	427.743	2.83581	3.40302e-05	0.00224392
ENSG00000166441.13	RPL27A	425.588	2.33247	2.13256e-05	0.00162934
ENSG00000108518.8	PFN1	400.31	2.62675	0.00115673	0.0199979
ENSG00000165283.16	STOML2	395.701	3.15419	0.000106115	0.00503719
ENSG00000115758.13	ODC1	392.887	2.66134	7.20582e-06	0.000759071
ENSG00000173812.11	EIF1	390.259	2.2725	4.30769e-05	0.00267062
ENSG00000008988.11	RPS20	386.314	2.14648	7.68692e-06	0.000782201
ENSG00000083845.9	RPS5	380.707	2.00657	0.000938552	0.0178919
ENSG00000163682.17	RPL9	358.85	2.2792	4.52225e-05	0.00277044
ENSG00000101361.17	NOP56	358.368	2.29006	1.6214e-05	0.00133387
ENSG00000143742.14	SRP9	345.096	2.86087	4.65982e-05	0.00277597
ENSG00000196419.13	XRCC6	343.943	2.35623	6.8484e-05	0.00374408
ENSG00000115484.15	CCT4	343.244	2.70438	1.37927e-05	0.00118399
ENSG00000134419.15	RPS15A	339.805	2.80851	4.85458e-07	8.38677e-05
ENSG00000118816.11	CCNI	332.295	2.62725	1.03717e-05	0.000953095
ENSG00000173726.11	TOMM20	326.543	2.01812	0.00134195	0.0213448
ENSG00000259040.5	BLOC1S5-TXNDC5	322.424	7.82832	3.4397e-07	6.60269e-05
ENSG00000091527.17	CDV3	317.929	2.9346	2.31229e-06	0.000285337
ENSG00000120705.13	ETF1	315.026	2.78978	4.18358e-07	7.68889e-05
ENSG00000070756.17	PABPC1	314.14	2.73804	3.50684e-08	9.46627e-06
ENSG00000100823.12	APEX1	303.532	3.63091	0.00111127	0.0196652
ENSG00000135624.17	CCT7	303.296	2.37286	4.56506e-05	0.00277597
ENSG00000259952.1	ENSG00000259952	300.624	5.25034	0.00188268	0.0249366
ENSG00000089006.17	SNX5	300.441	3.91178	2.28525e-10	9.86998e-08
ENSG00000155959.12	VBP1	284.81	2.41832	0.00122852	0.0206397
ENSG00000116459.11	ATP5PB	281.363	3.07113	2.08522e-05	0.00162272
ENSG00000124767.7	GLO1	279.517	2.51409	0.000305657	0.00956617
ENSG00000130741.11	EIF2S3	279.238	2.30501	2.76595e-05	0.00195838
ENSG00000164548.12	TRA2A	268.381	2.5529	8.11777e-05	0.00430192
ENSG00000262831.1	ENSG00000262831	265.095	4.91085	0.0043377	0.0378094
ENSG00000196890.5	H2BU1	263.466	4.04665	4.06604e-05	0.00258254
ENSG00000165119.21	HNRNPK	261.596	2.6821	9.6706e-06	0.000898222
ENSG00000145919.11	BOD1	261.191	3.41382	0.00018994	0.00749177
ENSG00000156261.13	CCT8	258.979	3.66111	1.33063e-06	0.000194814
ENSG00000183684.8	ALYREF	256.305	3.54336	0.000680126	0.0152595
ENSG00000270800.3	RPS10-NUDT3	255.771	2.01731	0.000256302	0.00878545
ENSG00000100380.15	ST13	252.945	2.18744	0.000115066	0.00525895
ENSG00000055044.11	NOP58	248.2	2.50648	8.21733e-05	0.00432813
ENSG00000124562.10	SNRPC	245.821	3.16134	0.00619653	0.0449229
ENSG00000166508.18	MCM7	244.403	2.07325	0.000165535	0.00671309
ENSG00000145741.17	BTF3	242.613	2.08027	0.000347653	0.010204
ENSG00000115875.19	SRSF7	241.645	2.88461	0.000331799	0.00998635
ENSG00000170889.14	RPS9	238.884	2.90439	0.000112305	0.00516008
ENSG00000093009.11	CDC45	238.812	3.14803	6.2138e-05	0.00346289
ENSG00000113407.14	TARS1	236.828	2.04896	0.000162894	0.00666863
ENSG00000175130.7	MARCKSL1	233.608	3.40968	0.00503287	0.0406573
ENSG00000125977.7	EIF2S2	232.694	2.38451	0.000496684	0.0126559
ENSG00000280195.1	ENSG00000280195	232.035	3.30686	0.00186749	0.0248557
ENSG00000233822.6	H2BC15	231.609	4.883	0.00010204	0.00492417
ENSG00000156482.11	RPL30	231.184	2.16751	0.00251539	0.0294019
ENSG00000197451.12	HNRNPAB	228.57	3.36369	0.000211272	0.00790581
ENSG00000124207.17	CSE1L	228.304	2.16023	0.000206416	0.00788949
ENSG00000283900.1	TPTEP2-CSNK1E	227.057	2.14713	0.00699313	0.0477146
ENSG00000239264.9	TXNDC5	226.497	7.8525	3.29018e-07	6.46973e-05
ENSG00000135837.16	CEP350	225.5	6.12489	4.94162e-13	3.88052e-10
ENSG00000159873.10	CCDC117	224.523	4.39433	3.23743e-07	6.46973e-05
ENSG00000112312.10	GMNN	224.075	3.60676	0.000143489	0.00601679
ENSG00000205581.11	HMGN1	223.576	2.41108	7.25878e-05	0.00394348
ENSG00000147274.14	RBMX	221.174	2.64411	1.38439e-05	0.00118399
ENSG00000008018.9	PSMB1	220.937	2.82434	0.00122917	0.0206397
ENSG00000143612.21	C1orf43	214.986	2.45985	0.000487367	0.0126044
ENSG00000126261.13	UBA2	212.412	2.21705	0.000101872	0.00492417
ENSG00000282988.2	ENSG00000282988	212.136	3.75526	0.00311508	0.032537
ENSG00000234741.9	GAS5	206.52	2.7422	0.000563817	0.0136422
ENSG00000069275.13	NUCKS1	205.061	2.35216	4.75329e-05	0.00281225
ENSG00000109686.19	SH3D19	199.877	3.26397	5.10337e-08	1.25951e-05
ENSG00000162607.13	USP1	194.835	2.03579	0.00160469	0.0237753
ENSG00000109475.17	RPL34	194.682	2.56493	0.0028863	0.03144
ENSG00000065548.18	ZC3H15	193.501	3.64866	0.000220372	0.00803194
ENSG00000174574.16	AKIRIN1	192.39	2.43916	0.00215119	0.0269304
ENSG00000169045.17	HNRNPH1	192.027	2.59631	7.49669e-07	0.000119919
ENSG00000075415.15	SLC25A3	190.121	2.66796	1.39915e-06	0.000198511
ENSG00000143321.19	HDGF	186.772	2.3014	0.000341123	0.0101608
ENSG00000254870.5	ATP6V1G2-DDX39B	186.276	2.27727	0.00436006	0.0378895
ENSG00000101057.16	MYBL2	185.187	2.01772	0.00262612	0.02992
ENSG00000234009.1	RPL5P34	180.248	5.23174	0.00311229	0.032537
ENSG00000049541.11	RFC2	180.031	3.53998	0.000980934	0.0184202
ENSG00000168883.20	USP39	180.008	2.35479	0.000792414	0.0165735
ENSG00000100219.17	XBP1	178.909	5.53579	0.000298337	0.00954028
ENSG00000198492.16	YTHDF2	177.734	3.4869	2.42847e-05	0.00177772
ENSG00000141030.13	COPS3	177.111	3.90763	0.000125111	0.0055421
ENSG00000103495.15	MAZ	176.698	3.1354	9.15124e-05	0.00456927
ENSG00000120254.16	MTHFD1L	176.434	3.23166	8.35547e-06	0.00081095
ENSG00000086598.11	TMED2	175.416	2.40406	0.000252849	0.00870163
ENSG00000143368.10	SF3B4	174.521	4.68471	0.003328	0.0332338
ENSG00000115241.11	PPM1G	172.148	2.00114	0.00295753	0.031953
ENSG00000155561.15	NUP205	172.115	2.01374	0.000208669	0.00790561
ENSG00000101166.16	PRELID3B	170.137	3.07557	0.000496164	0.0126559
ENSG00000241685.10	ARPC1A	168.573	3.91355	0.00217737	0.027062
ENSG00000132475.10	H3-3B	164.233	2.05818	0.000760806	0.0161824
ENSG00000170606.16	HSPA4	163.678	2.1676	0.000310026	0.00963312
ENSG00000179262.10	RAD23A	163.067	2.94051	0.00331944	0.0332338
ENSG00000105887.11	MTPN	162.545	2.42969	0.00037344	0.0105923
ENSG00000184216.14	IRAK1	162.043	2.34138	0.00125716	0.0208166
ENSG00000196449.4	YRDC	160.502	4.65107	0.00415018	0.0369961
ENSG00000173674.11	EIF1AX	160.338	2.25587	0.000740587	0.0159764
ENSG00000088930.8	XRN2	160.201	3.216	0.000107752	0.00505466
ENSG00000116754.14	SRSF11	160.16	2.36937	4.18088e-05	0.00261699
ENSG00000169714.17	CNBP	158.872	2.61893	0.000386785	0.0106934
ENSG00000126698.11	DNAJC8	156.766	2.1135	0.00519785	0.0412699
ENSG00000110321.19	EIF4G2	156.13	2.51082	2.16109e-06	0.000274522
ENSG00000166197.17	NOLC1	155.62	2.40977	0.000343861	0.0101722
ENSG00000125871.14	MGME1	154.648	3.88563	0.00128902	0.0210667
ENSG00000121579.14	NAA50	154.567	3.41721	1.41825e-06	0.000198511
ENSG00000159346.13	ADIPOR1	152.304	2.3712	0.00347496	0.0339171
ENSG00000183955.14	KMT5A	151.13	2.0512	0.00319153	0.0329372
ENSG00000266086.3	ENSG00000266086	150.758	2.53197	0.00313904	0.0327081
ENSG00000117519.16	CNN3	149.929	2.5735	0.0014868	0.0225711
ENSG00000136108.15	CKAP2	149.394	2.8654	8.41966e-05	0.00438127
ENSG00000084090.14	STARD7	149.39	2.50736	0.00045244	0.0119883
ENSG00000119414.12	PPP6C	148.045	3.49795	3.02906e-05	0.00204414
ENSG00000113328.19	CCNG1	147.928	2.015	0.00651249	0.0461863
ENSG00000091542.9	ALKBH5	147.457	2.96144	0.000751988	0.0161183
ENSG00000149547.15	EI24	147.258	2.46304	0.00123438	0.0206397
ENSG00000169021.6	UQCRFS1	143.429	3.31015	0.00191297	0.0251894
ENSG00000164045.12	CDC25A	143.303	2.49943	0.00028862	0.00937254
ENSG00000151725.12	CENPU	142.74	2.61891	0.00216201	0.0269487
ENSG00000060688.13	SNRNP40	142.336	2.12353	0.00423177	0.0373381
ENSG00000116489.13	CAPZA1	138.954	2.57999	0.000653332	0.0149298
ENSG00000124193.16	SRSF6	138.877	3.32188	2.46672e-05	0.00178498
ENSG00000129351.17	ILF3	138.251	2.19086	0.00019102	0.00750015
ENSG00000087088.21	BAX	138.12	3.94534	0.00204688	0.0262719
ENSG00000213281.5	NRAS	137.307	2.85319	0.000137993	0.00587183
ENSG00000076003.5	MCM6	136.96	2.44076	0.000419264	0.0113175
ENSG00000112308.13	C6orf62	136.867	3.26457	0.00177298	0.0244648
ENSG00000213585.11	VDAC1	136.849	2.13989	0.00450588	0.0384685
ENSG00000119318.13	RAD23B	134.76	2.1525	0.0011645	0.0199979
ENSG00000160208.13	RRP1B	134.708	4.08194	7.71778e-06	0.000782201
ENSG00000170515.14	PA2G4	133.189	2.02887	0.00703307	0.0477973
ENSG00000138363.15	ATIC	132.636	5.45139	0.000309556	0.00963312
ENSG00000259399.1	TGIF2-RAB5IF	132.616	4.8663	0.00690339	0.0475089
ENSG00000079246.16	XRCC5	132.22	2.0288	0.00139244	0.0218292
ENSG00000198176.13	TFDP1	130.945	3.40175	0.000189108	0.00749177
ENSG00000099194.6	SCD	130.097	2.87515	3.86376e-05	0.00247223
ENSG00000185721.13	DRG1	129.702	3.05511	0.00334154	0.033292
ENSG00000185787.15	MORF4L1	128.071	3.14803	1.5935e-05	0.00132352
ENSG00000128951.14	DUT	127.897	2.7649	0.00345887	0.033875
ENSG00000026025.16	VIM	127.517	2.37458	0.000511639	0.0129605
ENSG00000130985.17	UBA1	127.255	3.57992	1.11352e-05	0.000991607
ENSG00000205060.11	SLC35B4	127.008	4.23803	1.88166e-06	0.000242593
ENSG00000102144.15	PGK1	126.209	3.55451	1.73335e-05	0.00139283
ENSG00000145050.19	MANF	125.736	4.54076	0.007195	0.0482794
ENSG00000111481.10	COPZ1	124.787	2.40398	0.00182709	0.0248376
ENSG00000029993.15	HMGB3	124.079	3.40768	0.000235017	0.00841681
ENSG00000251022.6	THAP9-AS1	123.294	4.57219	8.97193e-05	0.00454126
ENSG00000159352.16	PSMD4	122.092	2.3872	0.00665596	0.046673
ENSG00000060339.14	CCAR1	122.005	2.30268	0.000304448	0.00956617
ENSG00000128654.14	MTX2	121.732	5.62154	0.00164618	0.0238586
ENSG00000111011.18	RSRC2	121.612	2.60994	2.97968e-05	0.00202665
ENSG00000136450.13	SRSF1	121.537	3.29748	1.83458e-05	0.00145386
ENSG00000099783.12	HNRNPM	121.273	2.00807	0.00112062	0.0197196
ENSG00000168003.18	SLC3A2	120.577	4.05299	1.10114e-05	0.000990794
ENSG00000113368.12	LMNB1	119.506	2.66778	0.00139524	0.0218336
ENSG00000174371.17	EXO1	119.434	2.63517	0.000649101	0.0149121
ENSG00000104341.17	LAPTM4B	118.974	2.44686	0.00744239	0.0494138
ENSG00000232956.10	SNHG15	118.198	3.28427	0.00255511	0.0295859
ENSG00000170027.7	YWHAG	116.974	2.88012	0.000610781	0.0142979
ENSG00000285565.1	ENSG00000285565	116.545	5.2317	0.00417324	0.0370973
ENSG00000124785.9	NRN1	115.631	4.49181	0.00697251	0.0476707
ENSG00000124422.12	USP22	115.599	2.93324	1.70674e-05	0.00139083
ENSG00000213923.13	CSNK1E	115.405	2.05669	0.00099678	0.0186772
ENSG00000175970.11	UNC119B	113.512	3.38355	7.56723e-05	0.00405998
ENSG00000106244.13	PDAP1	113.207	2.83261	0.00343507	0.0337384
ENSG00000256206.2	ENSG00000256206	112.025	5.03593	0.0023787	0.0285775
ENSG00000179195.16	ZNF664	111.455	3.3519	2.47972e-05	0.00178498
ENSG00000167553.17	TUBA1C	110.503	2.38285	0.00441532	0.0380815
ENSG00000169813.17	HNRNPF	109.171	2.36954	0.00406393	0.0363775
ENSG00000179091.5	CYC1	108.828	5.67388	0.00174577	0.0242053
ENSG00000186625.14	KATNA1	108.533	4.34376	0.00701744	0.0477521
ENSG00000148773.14	MKI67	108.399	5.91507	1.46196e-07	3.0801e-05
ENSG00000057608.17	GDI2	107.476	2.16575	0.00464912	0.0391414
ENSG00000155438.12	NIFK	107.137	3.51871	0.00355985	0.0343959
ENSG00000143878.10	RHOB	106.806	4.4457	0.00657833	0.0464245
ENSG00000125835.20	SNRPB	105.876	3.2308	0.000210133	0.00790581
ENSG00000116761.12	CTH	105.048	5.91745	0.000403319	0.0109901
ENSG00000152102.18	FAM168B	104.907	4.05149	3.56989e-05	0.00231855
ENSG00000100664.11	EIF5	104.299	2.1598	0.000164076	0.00668531
ENSG00000187522.16	HSPA14	104.268	2.95595	0.00651136	0.0461863
ENSG00000153574.9	RPIA	104.267	5.49	0.0010703	0.0193822
ENSG00000120686.12	UFM1	103.461	6.72229	2.85976e-05	0.00197621
ENSG00000116906.13	GNPAT	103.209	2.51257	0.00497561	0.0404702
ENSG00000091317.8	CMTM6	103.101	3.55787	0.00055986	0.0135845
ENSG00000094804.12	CDC6	103.088	2.37892	0.000926339	0.0178368
ENSG00000047621.12	C12orf4	102.519	4.44157	0.000172138	0.00694825
ENSG00000103194.16	USP10	102.053	2.44866	0.00148461	0.0225711
ENSG00000184575.12	XPOT	102.037	2.70271	4.12681e-05	0.002602
ENSG00000006625.18	GGCT	101.715	5.11009	0.00259165	0.0297998
ENSG00000164163.11	ABCE1	101.243	4.15978	2.352e-05	0.00175143
ENSG00000009844.16	VTA1	101.214	3.36515	2.96019e-05	0.00202665
ENSG00000180817.12	PPA1	100.999	2.00617	0.00360503	0.0346289
ENSG00000122376.12	SHLD2	100.88	5.19769	0.000671817	0.0151328
ENSG00000111445.14	RFC5	100.754	3.28794	0.00135191	0.0213448
ENSG00000138071.15	ACTR2	100.404	3.54639	0.000430871	0.0115228
ENSG00000175416.16	CLTB	100.212	5.52326	0.00133171	0.0213448
ENSG00000243317.8	STMP1	99.8313	4.41381	0.000449139	0.0119374
ENSG00000100575.14	TIMM9	99.6236	5.07198	0.00391118	0.035789
ENSG00000148730.7	EIF4EBP2	99.6042	2.51771	0.00020216	0.00776755
ENSG00000123545.6	NDUFAF4	99.5237	5.90973	0.00087008	0.0173574
ENSG00000100814.18	CCNB1IP1	99.3952	2.39592	0.00536466	0.0418326
ENSG00000205250.9	E2F4	99.3653	2.92739	0.00384072	0.0355967
ENSG00000035141.8	FAM136A	99.3508	3.09256	0.00431182	0.0376224
ENSG00000154813.10	DPH3	98.8878	3.71815	0.0010757	0.0194391
ENSG00000164024.12	METAP1	98.6475	3.54994	0.000527141	0.0130672
ENSG00000253729.8	PRKDC	98.4905	2.18664	2.83259e-05	0.00197621
ENSG00000175061.19	SNHG29	97.8508	2.25524	0.000881886	0.0174719
ENSG00000109332.20	UBE2D3	97.8503	3.05848	5.21777e-06	0.000577834
ENSG00000083520.15	DIS3	97.8351	2.95433	3.41516e-06	0.000409724
ENSG00000156374.16	PCGF6	97.5873	2.6676	0.0069183	0.047542
ENSG00000284292.1	ENSG00000284292	97.4401	3.60553	0.00496288	0.0404702
ENSG00000168393.13	DTYMK	97.054	5.76625	0.0016074	0.0237753
ENSG00000089685.15	BIRC5	96.8846	2.68613	0.00419194	0.0371096
ENSG00000114956.20	DGUOK	96.6479	5.0473	0.00631912	0.0453737
ENSG00000131876.18	SNRPA1	96.3416	3.95122	0.000959976	0.0181848
ENSG00000114850.7	SSR3	95.7004	2.67602	0.0015939	0.0236972
ENSG00000166004.15	CEP295	95.4451	4.73237	1.48112e-06	0.000199933
ENSG00000165527.8	ARF6	94.6983	2.68565	0.00281463	0.0310508
ENSG00000251562.9	MALAT1	94.6064	3.36913	3.96462e-06	0.000456619
ENSG00000156976.17	EIF4A2	93.9624	2.00841	0.00678219	0.0470558
ENSG00000168411.14	RFWD3	93.9108	2.3674	0.000928901	0.0178368
ENSG00000084463.8	WBP11	93.8236	3.04842	0.00035404	0.0102624
ENSG00000104824.18	HNRNPL	93.0345	3.07882	0.000130983	0.00569887
ENSG00000147140.17	NONO	92.9886	2.58265	7.64332e-06	0.000782201
ENSG00000048828.17	FAM120A	92.792	2.4341	0.000278104	0.00916894
ENSG00000177383.5	MAGEF1	92.1578	5.20891	0.00370958	0.0349437
ENSG00000022840.17	RNF10	91.4944	2.09119	0.00206957	0.0262896
ENSG00000166012.17	TAF1D	91.4506	3.19495	0.000131557	0.00569887
ENSG00000168385.18	SEPTIN2	91.3921	3.29966	2.11534e-05	0.00162934
ENSG00000172466.16	ZNF24	90.3447	3.2343	2.7657e-05	0.00195838
ENSG00000113810.16	SMC4	90.0296	2.15889	0.000350926	0.0102064
ENSG00000183431.12	SF3A3	89.9877	2.61116	0.00476037	0.0398451
ENSG00000101782.15	RIOK3	89.408	3.66539	0.00024593	0.0085659
ENSG00000154518.10	ATP5MC3	88.8541	3.88674	0.00175211	0.0242543
ENSG00000143420.19	ENSA	88.671	2.8016	0.00184591	0.0248557
ENSG00000108179.14	PPIF	88.6084	5.77804	0.000355582	0.0102726
ENSG00000103035.11	PSMD7	88.4788	5.86639	0.000301516	0.00954028
ENSG00000147853.17	AK3	88.4681	5.05328	0.00129819	0.0211182
ENSG00000238045.9	ENSG00000238045	87.8814	3.34471	0.00128524	0.0210662
ENSG00000047634.15	SCML1	87.7894	2.404	0.00560665	0.0428586
ENSG00000184840.12	TMED9	87.7111	6.14134	0.000262547	0.00885891
ENSG00000108064.11	TFAM	87.5805	3.02281	0.000719254	0.0157777
ENSG00000197111.16	PCBP2	87.5462	2.61967	0.000180074	0.00720127
ENSG00000196152.10	ZNF79	87.1231	5.54279	0.00170101	0.0239696
ENSG00000119396.11	RAB14	86.6888	3.41943	0.00110066	0.0195627
ENSG00000143748.18	NVL	86.4993	2.78135	0.00112375	0.0197296
ENSG00000167635.12	ZNF146	86.4333	2.17668	0.0062925	0.0452919
ENSG00000113712.19	CSNK1A1	86.3743	2.98267	5.16399e-05	0.00299727
ENSG00000163320.12	CGGBP1	85.5964	2.81451	0.000227904	0.00823695
ENSG00000152240.13	HAUS1	85.585	5.43444	0.00425535	0.0373554
ENSG00000149100.13	EIF3M	85.427	3.45399	3.11007e-05	0.00208254
ENSG00000196363.10	WDR5	85.194	3.76176	0.00216911	0.0269983
ENSG00000206053.13	JPT2	85.0132	3.58758	0.000534207	0.0131785
ENSG00000204394.13	VARS1	84.5519	2.24142	0.00478932	0.0399325
ENSG00000113300.13	CNOT6	84.3023	3.9988	5.21562e-05	0.00299727
ENSG00000123505.19	AMD1	83.4536	2.39429	8.98998e-05	0.00454126
ENSG00000167995.17	BEST1	83.3606	2.2491	0.00127761	0.0210044
ENSG00000196704.14	AMZ2	83.3317	5.23409	0.000869637	0.0173574
ENSG00000103342.13	GSPT1	83.2926	2.38125	0.000287865	0.00937254
ENSG00000198563.14	DDX39B	83.1268	2.67453	0.00044778	0.0119374
ENSG00000182307.14	C8orf33	82.9677	3.37738	0.00146937	0.0224801
ENSG00000109805.10	NCAPG	82.9152	2.54533	0.00135045	0.0213448
ENSG00000197498.13	RPF2	82.8767	3.19904	0.00164509	0.0238586
ENSG00000123091.5	RNF11	82.4715	2.84309	0.00744177	0.0494138
ENSG00000164466.13	SFXN1	82.2672	2.87615	0.000161957	0.00666185
ENSG00000143155.13	TIPRL	82.0048	3.5269	0.00352179	0.0341813
ENSG00000087365.16	SF3B2	81.9811	2.12407	0.000338014	0.010103
ENSG00000100601.10	ALKBH1	81.7817	5.76595	0.000913329	0.0177624
ENSG00000090273.14	NUDC	81.753	3.34134	0.00665736	0.046673
ENSG00000123684.13	LPGAT1	81.301	3.6188	8.69989e-06	0.000834996
ENSG00000102178.13	UBL4A	81.1704	5.62783	0.000597294	0.0141354
ENSG00000131153.9	GINS2	81.1641	4.51355	0.00417675	0.0370973
ENSG00000186522.15	SEPTIN10	81.1622	3.29261	0.00206365	0.0262896
ENSG00000156504.17	PABIR2	81.1348	6.38479	5.06724e-05	0.00297761
ENSG00000119333.12	DYNC2I2	81.0984	5.65911	0.00144329	0.0222627
ENSG00000022267.19	FHL1	80.8805	3.36312	0.000248646	0.0085912
ENSG00000063244.13	U2AF2	80.6527	2.82484	0.00444407	0.0381969
ENSG00000169718.18	DUS1L	80.3139	3.36445	0.000297781	0.00954028
ENSG00000106682.16	EIF4H	80.1903	2.00241	0.00424932	0.0373554
ENSG00000213639.10	PPP1CB	80.1106	2.13063	0.0040098	0.0361929
ENSG00000117143.14	UAP1	79.8526	3.95753	0.00108095	0.0194905
ENSG00000136193.17	SCRN1	79.6632	5.37907	0.000371798	0.0105923
ENSG00000101193.8	GID8	79.62	3.99433	0.0009039	0.0176965
ENSG00000113141.19	IK	79.5842	2.45434	0.00483013	0.0400416
ENSG00000153989.8	NUS1	79.4696	2.70039	0.00200923	0.0260209
ENSG00000036549.13	ZZZ3	79.3334	3.14155	1.74144e-05	0.00139283
ENSG00000113013.16	HSPA9	79.2228	2.04618	0.000412343	0.0111656
ENSG00000109536.12	FRG1	79.0669	4.89267	0.00676002	0.0470407
ENSG00000101413.12	RPRD1B	79.0043	3.562	0.000651157	0.0149196
ENSG00000099942.13	CRKL	78.8268	2.38603	0.00326508	0.0332114
ENSG00000130766.5	SESN2	78.7952	2.97919	0.00508965	0.0407938
ENSG00000174238.16	PITPNA	78.6707	3.4028	0.00103071	0.0189649
ENSG00000182944.18	EWSR1	78.2123	2.12705	0.000594736	0.0141299
ENSG00000159461.15	AMFR	78.1098	2.99157	0.000924058	0.0178368
ENSG00000164091.12	WDR82	78.0665	2.97357	0.000520757	0.0130327
ENSG00000162521.19	RBBP4	77.288	2.05287	0.000848186	0.0171175
ENSG00000087460.29	GNAS	77.1852	2.64867	6.96611e-07	0.000115718
ENSG00000115524.17	SF3B1	77.0564	2.42862	9.61307e-05	0.00477228
ENSG00000213468.7	FIRRE	76.9245	2.56531	0.000317316	0.00975437
ENSG00000182199.11	SHMT2	76.8923	3.38061	0.00271626	0.0303925
ENSG00000158042.9	MRPL17	76.783	5.54162	0.00133636	0.0213448
ENSG00000129084.18	PSMA1	76.4657	5.8409	0.000323257	0.00979854
ENSG00000131238.18	PPT1	76.1125	2.87197	0.00740129	0.0492671
ENSG00000163634.12	THOC7	76.0101	5.01076	0.0033206	0.0332338
ENSG00000129515.20	SNX6	75.6563	6.1633	9.12006e-05	0.00456927
ENSG00000133226.18	SRRM1	75.5626	2.21716	0.00101626	0.0189191
ENSG00000035928.17	RFC1	75.3198	2.61883	0.000465989	0.0121307
ENSG00000132388.13	UBE2G1	75.2334	2.56676	0.00345303	0.0338562
ENSG00000113460.13	BRIX1	75.0482	2.61985	0.0037265	0.0350212
ENSG00000120137.7	PANK3	75.0002	2.45127	0.000466243	0.0121307
ENSG00000130175.10	PRKCSH	74.985	3.05065	0.00167286	0.0239079
ENSG00000143033.18	MTF2	74.9318	2.47811	0.00206704	0.0262896
ENSG00000040275.17	SPDL1	74.8309	2.94524	0.001505	0.0227674
ENSG00000011304.22	PTBP1	74.7894	2.03722	0.00206331	0.0262896
ENSG00000178691.11	SUZ12	74.719	2.57781	0.000696933	0.0154362
ENSG00000139737.22	SLAIN1	74.6981	2.48855	0.00643294	0.0459237
ENSG00000134001.15	EIF2S1	74.6756	3.09142	0.000850414	0.0171175
ENSG00000153561.13	RMND5A	74.5911	3.46987	0.000136599	0.00584132
ENSG00000120253.14	NUP43	74.5834	2.84728	0.00303318	0.0322668
ENSG00000176619.13	LMNB2	74.4212	2.08257	0.00486175	0.0401874
ENSG00000116237.16	ICMT	74.3378	3.96331	0.000844622	0.0171175
ENSG00000100422.14	CERK	74.1936	2.7016	0.00240512	0.0288147
ENSG00000114302.16	PRKAR2A	74.1335	4.40931	0.000131949	0.00569887
ENSG00000143771.12	CNIH4	74.1249	5.01215	0.00242063	0.0288804
ENSG00000159131.17	GART	74.0566	2.16179	0.00162243	0.0238263
ENSG00000162368.14	CMPK1	73.8277	3.57808	0.00352773	0.0341813
ENSG00000134748.13	PRPF38A	73.6001	2.33902	0.00234898	0.0282597
ENSG00000138050.15	THUMPD2	73.5667	3.5942	0.00325348	0.0332114
ENSG00000188428.20	BLOC1S5	73.3996	5.77866	0.000388715	0.0106934
ENSG00000110851.12	PRDM4	73.3496	3.96033	0.000978898	0.0184202
ENSG00000149636.16	DSN1	73.2228	5.53604	0.000604099	0.0142574
ENSG00000077097.16	TOP2B	72.7092	2.48842	0.00103409	0.0189649
ENSG00000255302.5	EID1	72.6979	5.08656	0.00215545	0.0269447
ENSG00000132485.14	ZRANB2	72.5268	2.93676	0.00168294	0.0239413
ENSG00000122203.15	KIAA1191	72.185	2.92152	0.00442782	0.0381282
ENSG00000183688.4	RFLNB	72.1534	3.51135	0.00419298	0.0371096
ENSG00000082153.18	BZW1	71.6618	3.02655	0.000141019	0.00594205
ENSG00000062485.19	CS	71.4896	2.11527	0.00367496	0.0348808
ENSG00000086475.15	SEPHS1	71.4225	3.02256	0.00469434	0.0394452
ENSG00000041357.16	PSMA4	71.3063	2.6277	0.00187668	0.0249013
ENSG00000174903.16	RAB1B	71.1295	5.02406	0.00511728	0.0408909
ENSG00000182979.18	MTA1	70.9859	2.1383	0.0044907	0.0384447
ENSG00000029725.17	RABEP1	70.8668	2.1149	0.0028728	0.0314117
ENSG00000108654.16	DDX5	70.7272	2.3655	0.000237752	0.00841681
ENSG00000106305.10	AIMP2	70.4121	5.02277	0.00570764	0.0433862
ENSG00000100811.14	YY1	70.3134	2.37822	0.000548239	0.0133776
ENSG00000165609.13	NUDT5	69.9695	2.84627	0.00579442	0.0436776
ENSG00000055130.18	CUL1	69.7741	3.0878	0.00261601	0.02992
ENSG00000067064.13	IDI1	69.3458	3.13568	0.0042661	0.0374117
ENSG00000172053.18	QARS1	69.1138	2.47282	0.00676366	0.0470407
ENSG00000082213.18	C5orf22	68.7617	4.62415	0.00307703	0.0325329
ENSG00000111206.13	FOXM1	68.5	2.49326	0.0047778	0.0399315
ENSG00000166938.13	DIS3L	67.9939	3.42509	0.00106326	0.0193041
ENSG00000118412.13	CASP8AP2	67.9095	4.5614	9.96206e-05	0.00486171
ENSG00000171865.10	RNASEH1	67.5361	4.07106	0.000535994	0.0131785
ENSG00000101189.7	MRGBP	67.2948	5.4703	0.00133832	0.0213448
ENSG00000132773.12	TOE1	67.2946	5.37537	0.00173064	0.0240788
ENSG00000215301.11	DDX3X	67.1908	2.6092	5.73131e-06	0.000618838
ENSG00000131475.7	VPS25	67.1689	5.23173	0.00324327	0.0331542
ENSG00000257093.7	DENND11	67.0511	5.41641	0.00033637	0.0100888
ENSG00000197771.13	MCMBP	67.0487	3.15488	0.00122613	0.0206397
ENSG00000147649.10	MTDH	66.8328	4.51567	8.56685e-05	0.00440563
ENSG00000139644.13	TMBIM6	66.7048	3.13469	0.00074167	0.0159764
ENSG00000111328.7	CDK2AP1	66.5529	3.10311	0.00372997	0.0350212
ENSG00000125037.13	EMC3	66.4176	4.5664	0.00536667	0.0418326
ENSG00000164985.15	PSIP1	66.1439	2.66529	0.001091	0.0195154
ENSG00000112972.15	HMGCS1	66.0356	2.66834	0.00134071	0.0213448
ENSG00000108010.12	GLRX3	65.9001	3.34631	0.00262782	0.02992
ENSG00000156639.12	ZFAND3	65.3808	5.86613	0.00037421	0.0105923
ENSG00000116350.18	SRSF4	65.2283	2.87352	0.000268078	0.00901035
ENSG00000181026.15	AEN	65.1929	2.51077	0.00251529	0.0294019
ENSG00000179295.19	PTPN11	65.1019	2.25232	0.000130953	0.00569887
ENSG00000169018.6	FEM1B	64.7068	2.60116	0.000576232	0.0138936
ENSG00000143398.20	PIP5K1A	64.5441	2.57474	0.00312352	0.0325857
ENSG00000163444.12	TMEM183A	64.5101	2.89967	0.00753135	0.0496989
ENSG00000144895.12	EIF2A	63.96	2.75026	0.0021033	0.0264886
ENSG00000154059.11	IMPACT	63.8777	2.42793	0.00690798	0.0475089
ENSG00000111605.18	CPSF6	63.8606	3.47526	8.56848e-05	0.00440563
ENSG00000134077.16	THUMPD3	63.8289	2.81098	0.00340631	0.0336396
ENSG00000168710.18	AHCYL1	63.7938	3.21367	0.00173106	0.0240788
ENSG00000135052.16	GOLM1	63.5361	4.53482	0.0033227	0.0332338
ENSG00000075945.13	KIFAP3	62.9813	3.19452	0.00308868	0.032537
ENSG00000132676.16	DAP3	62.8899	3.05999	0.0036642	0.0348808
ENSG00000196372.13	ASB13	62.6907	5.43271	0.0016163	0.0237847
ENSG00000136628.18	EPRS1	62.6524	2.25402	0.00586619	0.043872
ENSG00000141367.12	CLTC	62.651	2.2593	0.000736794	0.0159764
ENSG00000144224.17	UBXN4	62.5741	3.15492	0.00248245	0.0292125
ENSG00000144744.17	UBA3	62.5064	3.46939	0.00550469	0.0423573
ENSG00000198945.8	L3MBTL3	62.0938	6.22061	0.000121812	0.00545189
ENSG00000132305.22	IMMT	62.0911	3.29904	0.00697529	0.0476707
ENSG00000118707.11	TGIF2	62.0846	4.45488	0.00495024	0.0404702
ENSG00000139146.14	SINHCAF	62.0262	3.93358	0.000979344	0.0184202
ENSG00000167182.16	SP2	61.9919	5.71709	0.000828142	0.0168714
ENSG00000137656.12	BUD13	61.962	4.92146	0.00315712	0.0328542
ENSG00000179912.21	R3HDM2	61.5025	3.01034	0.00296279	0.031953
ENSG00000099622.14	CIRBP	61.1798	3.51549	0.00129655	0.0211182
ENSG00000175216.15	CKAP5	61.1102	2.02263	0.00220717	0.0272365
ENSG00000153201.16	RANBP2	61.0416	3.69868	4.44393e-06	0.000498528
ENSG00000132670.21	PTPRA	60.713	4.38874	0.00749394	0.0495277
ENSG00000068745.15	IP6K2	60.665	2.87514	0.00337683	0.0334892
ENSG00000037474.15	NSUN2	60.5701	2.27226	0.00665201	0.046673
ENSG00000106462.12	EZH2	60.4103	2.48687	0.000304819	0.00956617
ENSG00000114902.14	SPCS1	60.3969	3.10555	0.00757031	0.0499178
ENSG00000110435.13	PDHX	60.3161	4.2358	0.00748064	0.0495155
ENSG00000101152.11	DNAJC5	60.1164	3.21434	0.00216109	0.0269487
ENSG00000117632.23	STMN1	60.0269	2.73982	0.00389903	0.035789
ENSG00000100030.15	MAPK1	59.8179	2.18226	0.00534315	0.04181
ENSG00000197006.15	METTL9	59.5867	2.61611	0.00347356	0.0339171
ENSG00000221909.3	FAM200A	59.3719	5.23179	0.00219435	0.0271948
ENSG00000198911.12	SREBF2	59.2386	3.00912	0.000484721	0.0125736
ENSG00000088832.18	FKBP1A	59.1142	2.93879	0.00299772	0.0320474
ENSG00000100519.12	PSMC6	59.0783	3.66737	0.000282197	0.0092685
ENSG00000100813.15	ACIN1	58.8339	2.73021	0.000494942	0.0126559
ENSG00000111300.10	NAA25	58.8234	3.07067	0.000147098	0.00613834
ENSG00000183741.12	CBX6	58.7396	6.77199	1.08209e-05	0.000983902
ENSG00000086712.13	TXLNG	58.6459	3.51322	0.00351388	0.0341811
ENSG00000272886.6	DCP1A	58.5575	2.94529	0.00140762	0.0219082
ENSG00000146463.12	ZMYM4	58.4218	2.98218	0.000382006	0.0106934
ENSG00000113569.16	NUP155	58.4005	2.9628	0.000154747	0.00639571
ENSG00000010292.13	NCAPD2	58.3147	2.46843	0.00382072	0.0354839
ENSG00000134874.18	DZIP1	58.3146	2.0969	0.00286026	0.0313143
ENSG00000066044.15	ELAVL1	58.2779	2.56138	0.00231781	0.0281197
ENSG00000152234.16	ATP5F1A	58.2598	2.37333	0.00121488	0.0205768
ENSG00000033050.9	ABCF2	58.2397	3.72703	0.00169709	0.0239696
ENSG00000143384.14	MCL1	58.0454	3.95392	0.000683939	0.0152736
ENSG00000112877.8	CEP72	58.0051	5.58137	0.00157238	0.0234987
ENSG00000075292.19	ZNF638	57.9679	2.14588	0.000595425	0.0141299
ENSG00000058804.12	NDC1	57.7943	2.97719	0.00462528	0.0390549
ENSG00000197265.9	GTF2E2	57.4821	5.09536	0.00393965	0.0360113
ENSG00000124541.7	RRP36	57.3907	4.88599	0.00359433	0.0345913
ENSG00000158195.11	WASF2	57.2157	4.79682	0.00185636	0.0248557
ENSG00000120948.19	TARDBP	57.0069	3.90346	0.00109879	0.0195627
ENSG00000128989.11	ARPP19	56.9914	2.46398	0.0042843	0.0374952
ENSG00000130816.17	DNMT1	56.9111	2.91491	7.7876e-06	0.000782201
ENSG00000136536.15	MARCHF7	56.8253	2.36908	0.00360802	0.0346289
ENSG00000103353.16	UBFD1	56.7939	3.29523	0.000381565	0.0106934
ENSG00000271793.2	ENSG00000271793	56.4029	2.23101	0.0022113	0.0272485
ENSG00000183475.13	ASB7	56.3574	4.71948	0.00318678	0.0329276
ENSG00000138777.20	PPA2	56.3076	3.50827	0.00585129	0.0438697
ENSG00000071626.17	DAZAP1	56.2894	3.15312	0.00023591	0.00841681
ENSG00000101752.13	MIB1	56.2781	2.44346	0.000258615	0.00882766
ENSG00000156735.11	BAG4	56.2447	4.56666	0.00332202	0.0332338
ENSG00000111266.9	DUSP16	56.2415	3.08829	0.000639851	0.0147782
ENSG00000030066.14	NUP160	56.1804	2.56459	0.000799892	0.0166895
ENSG00000162600.12	OMA1	56.1125	5.65753	0.000778591	0.0163637
ENSG00000111231.9	GPN3	55.8623	5.03122	0.00309206	0.032537
ENSG00000112339.15	HBS1L	55.8038	2.93104	7.38445e-05	0.00398668
ENSG00000067334.14	DNTTIP2	55.6036	3.21137	0.000719658	0.0157777
ENSG00000119138.5	KLF9	55.5521	4.63296	0.002633	0.02992
ENSG00000198498.10	TMA16	55.5008	5.48935	0.00113237	0.0198407
ENSG00000115750.17	TAF1B	55.4806	4.232	0.00761435	0.0499793
ENSG00000154473.18	BUB3	55.4579	2.456	0.00213139	0.0267991
ENSG00000059588.10	TARBP1	55.4278	3.21784	0.000776863	0.0163637
ENSG00000184992.13	BRI3BP	55.3703	2.97613	0.00145447	0.0223553
ENSG00000128283.7	CDC42EP1	55.3633	5.04987	0.00357925	0.0345062
ENSG00000009335.18	UBE3C	55.2862	2.14026	0.00281369	0.0310508
ENSG00000122299.12	ZC3H7A	55.1285	2.49063	0.00206095	0.0262896
ENSG00000197170.10	PSMD12	54.9499	3.68628	0.00208502	0.0264042
ENSG00000105849.6	POLR1F	54.8873	4.21723	0.00687304	0.0474196
ENSG00000079785.16	DDX1	54.6429	3.22072	0.000179242	0.00720127
ENSG00000128708.13	HAT1	54.4031	4.00503	0.000625203	0.014596
ENSG00000070814.22	TCOF1	54.3448	2.27424	0.00065554	0.0149408
ENSG00000188725.8	SMIM15	54.2799	5.21326	0.00205199	0.0262896
ENSG00000237649.8	KIFC1	54.2711	5.25177	0.00225411	0.0275793
ENSG00000093000.19	NUP50	54.2087	2.72516	0.000905516	0.0176965
ENSG00000181555.22	SETD2	54.1354	2.63282	0.000106132	0.00503719
ENSG00000118495.21	PLAGL1	54.0644	6.27536	9.96074e-05	0.00486171
ENSG00000146085.8	MMUT	53.8371	5.6111	0.000739881	0.0159764
ENSG00000101935.12	AMMECR1	53.7712	4.95788	0.00125228	0.0208024
ENSG00000131791.8	PRKAB2	53.6203	4.63556	0.00254809	0.0295441
ENSG00000113194.13	FAF2	53.5721	3.19378	0.00167337	0.0239079
ENSG00000165512.5	ZNF22	53.531	4.63178	0.00731976	0.0488625
ENSG00000169826.8	CSGALNACT2	53.4748	5.59966	0.000630493	0.0146798
ENSG00000099968.18	BCL2L13	53.4549	2.13405	0.00481143	0.0400017
ENSG00000125304.10	TM9SF2	53.4285	3.10293	0.00309903	0.032537
ENSG00000182173.14	TSEN54	53.3882	5.80332	0.00164126	0.0238586
ENSG00000136937.13	NCBP1	53.3132	3.70003	0.00206953	0.0262896
ENSG00000106723.17	SPIN1	53.2872	3.52668	0.00316604	0.0328542
ENSG00000006007.12	GDE1	53.1254	3.38997	0.00544132	0.0420477
ENSG00000117569.19	PTBP2	53.0744	5.08778	1.27868e-05	0.00111568
ENSG00000174780.17	SRP72	53.0216	2.83012	0.00233584	0.0282034
ENSG00000183010.17	PYCR1	52.9868	5.18761	0.00342185	0.0336651
ENSG00000159259.8	CHAF1B	52.6937	2.9714	0.00623871	0.045134
ENSG00000081181.8	ARG2	52.6518	4.67664	0.0064888	0.046128
ENSG00000114503.11	NCBP2	52.6215	5.97272	0.000212616	0.0079163
ENSG00000175215.11	CTDSP2	52.4827	2.60935	0.00599051	0.0443411
ENSG00000100372.15	SLC25A17	52.3976	5.62498	0.000875058	0.0174165
ENSG00000176102.13	CSTF3	52.1029	5.74212	0.000314662	0.00974212
ENSG00000196305.19	IARS1	52.1011	2.19496	8.68607e-05	0.00443966
ENSG00000104980.8	TIMM44	51.9744	4.41907	0.0062736	0.0452919
ENSG00000144233.11	AMMECR1L	51.9574	4.61354	0.00323418	0.0331005
ENSG00000167881.15	SRP68	51.8078	2.23181	0.00628586	0.0452919
ENSG00000136122.18	BORA	51.6868	5.21747	0.0013581	0.0213684
ENSG00000138814.17	PPP3CA	51.5919	4.5277	0.00368672	0.0348808
ENSG00000132912.13	DCTN4	51.485	3.2466	0.00146441	0.0224681
ENSG00000160752.15	FDPS	51.4642	5.59398	0.000847847	0.0171175
ENSG00000130560.9	UBAC1	51.4535	5.19788	0.00179982	0.0246423
ENSG00000198231.14	DDX42	51.4031	2.07658	0.00396709	0.0360334
ENSG00000169139.12	UBE2V2	51.1818	6.30584	5.76706e-05	0.00323479
ENSG00000108349.17	CASC3	51.0431	4.80333	0.00175511	0.024257
ENSG00000101911.13	PRPS2	50.9872	5.05429	0.00185918	0.0248557
ENSG00000181192.12	DHTKD1	50.9394	3.55497	0.00441742	0.0380815
ENSG00000110696.10	C11orf58	50.7469	2.31962	0.00233777	0.0282034
ENSG00000196323.14	ZBTB44	50.5688	3.59401	5.6126e-05	0.00317458
ENSG00000186575.19	NF2	50.5216	2.70515	0.00169258	0.0239696
ENSG00000198162.12	MAN1A2	50.2372	2.37328	0.00179257	0.0246171
ENSG00000109576.14	AADAT	50.1951	5.15855	0.00524592	0.0414207
ENSG00000115762.17	PLEKHB2	50.1396	4.86887	0.0016523	0.0238696
ENSG00000163659.13	TIPARP	50.107	3.33384	0.00583698	0.0438462
ENSG00000163660.12	CCNL1	50.0894	4.24144	0.000385993	0.0106934
ENSG00000171497.5	PPID	50.0865	4.92827	0.00367974	0.0348808
ENSG00000141759.15	TXNL4A	49.9313	5.9084	0.000375229	0.0105923
ENSG00000143106.13	PSMA5	49.7185	3.02749	0.00544308	0.0420477
ENSG00000084652.16	TXLNA	49.5867	2.9009	0.00573812	0.0434407
ENSG00000117523.18	PRRC2C	49.5534	2.3219	0.00032244	0.00979854
ENSG00000146281.6	PM20D2	49.5072	3.3413	0.00664273	0.046673
ENSG00000144580.14	CNOT9	49.3982	2.93372	0.00596599	0.0442354
ENSG00000163399.16	ATP1A1	49.3662	2.37645	0.00329683	0.0332338
ENSG00000155090.15	KLF10	49.2699	5.42476	0.00103387	0.0189649
ENSG00000065911.13	MTHFD2	49.2559	2.38698	0.000830578	0.0168813
ENSG00000006125.18	AP2B1	49.1971	2.03653	0.00680418	0.0471324
ENSG00000141447.19	OSBPL1A	49.1471	3.13878	0.00186571	0.0248557
ENSG00000101052.13	IFT52	49.0292	4.86692	0.00450684	0.0384685
ENSG00000109390.13	NDUFC1	49.0218	5.02349	0.0053653	0.0418326
ENSG00000134697.13	GNL2	48.9378	3.61183	0.002779	0.0308831
ENSG00000140534.14	TICRR	48.8537	2.52517	0.00268263	0.0302909
ENSG00000002549.13	LAP3	48.8012	5.40663	0.000920924	0.0178362
ENSG00000130396.21	AFDN	48.7993	2.85212	5.62295e-05	0.00317458
ENSG00000115806.13	GORASP2	48.6699	3.3138	0.00760272	0.0499793
ENSG00000104957.14	YJU2B	48.6531	5.20544	0.00730381	0.0487937
ENSG00000169016.17	E2F6	48.369	5.52297	0.000764346	0.0161824
ENSG00000100335.15	MIEF1	48.3635	4.02584	0.00068429	0.0152736
ENSG00000185624.16	P4HB	48.285	2.19495	0.0027665	0.0308349
ENSG00000132823.11	OSER1	48.1758	4.65486	0.0074664	0.0494971
ENSG00000167522.17	ANKRD11	48.0888	4.06104	1.21637e-06	0.000184334
ENSG00000172795.17	DCP2	48.048	2.39135	0.000608117	0.0142816
ENSG00000158019.21	BABAM2	48.0274	5.18554	0.00403396	0.0363216
ENSG00000137492.9	THAP12	48.0168	3.21686	0.000735786	0.0159764
ENSG00000118971.9	CCND2	47.9481	2.75143	0.00123532	0.0206397
ENSG00000124164.16	VAPB	47.815	3.107	0.000329167	0.00994175
ENSG00000136100.14	VPS36	47.7957	3.28754	0.00172694	0.0240788
ENSG00000103671.10	TRIP4	47.7937	5.09433	0.00361206	0.0346293
ENSG00000125870.11	SNRPB2	47.732	4.86624	0.00725106	0.0485278
ENSG00000132153.15	DHX30	47.629	2.397	0.00490742	0.0403333
ENSG00000074695.6	LMAN1	47.5991	3.63133	0.00213738	0.0268353
ENSG00000135679.27	MDM2	47.4141	2.7613	0.00127903	0.0210044
ENSG00000163125.16	RPRD2	46.9825	3.65294	0.000289926	0.00937897
ENSG00000078369.18	GNB1	46.9415	3.12627	0.00250022	0.0293038
ENSG00000096063.16	SRPK1	46.7921	2.79241	0.00265842	0.0300569
ENSG00000166266.14	CUL5	46.7822	4.63332	0.00270541	0.0303769
ENSG00000119950.21	MXI1	46.7651	6.02519	0.000245177	0.0085659
ENSG00000111412.6	SPRING1	46.7539	3.14782	0.000664911	0.0150748
ENSG00000154174.8	TOMM70	46.6075	3.32373	0.00541322	0.0419743
ENSG00000152291.15	TGOLN2	46.551	4.78822	0.00174018	0.0241667
ENSG00000175390.15	EIF3F	46.4531	2.91839	8.3173e-05	0.00435423
ENSG00000116698.22	SMG7	46.288	4.03905	0.000782669	0.0164095
ENSG00000221914.11	PPP2R2A	46.1382	2.54498	0.00263616	0.02992
ENSG00000179409.11	GEMIN4	46.1298	3.49725	0.00655006	0.0463766
ENSG00000070669.17	ASNS	45.9076	4.2102	0.00719109	0.0482794
ENSG00000079739.17	PGM1	45.8954	5.34756	0.00109347	0.0195154
ENSG00000050748.18	MAPK9	45.7366	3.16841	0.000764177	0.0161824
ENSG00000160633.13	SAFB	45.6512	2.47501	0.00380161	0.035348
ENSG00000173020.11	GRK2	45.5087	4.67387	0.00356552	0.0344122
ENSG00000177370.5	TIMM22	45.4002	5.07246	0.00449675	0.0384584
ENSG00000140463.14	BBS4	45.3858	5.43309	0.001658	0.0238696
ENSG00000106591.4	MRPL32	45.308	5.12368	0.00504048	0.0406573
ENSG00000146670.10	CDCA5	45.306	5.37831	0.000811248	0.0168089
ENSG00000069248.12	NUP133	44.9868	3.00222	0.0037741	0.0352059
ENSG00000126012.13	KDM5C	44.8892	5.56246	0.000259577	0.00882766
ENSG00000177733.7	HNRNPA0	44.625	3.45551	0.00108305	0.0194905
ENSG00000155545.20	MIER3	44.6016	5.867	0.000202327	0.00776755
ENSG00000161813.23	LARP4	44.5764	2.63532	0.00187478	0.0249013
ENSG00000163029.16	SMC6	44.5063	2.21399	0.00331455	0.0332338
ENSG00000155189.12	AGPAT5	44.4844	3.01028	0.0040092	0.0361929
ENSG00000272888.8	CHASERR	44.3865	4.67176	0.0036822	0.0348808
ENSG00000110422.12	HIPK3	44.3329	3.38387	0.000900664	0.0176817
ENSG00000176853.16	FAM91A1	44.2244	2.45355	0.00520771	0.0412699
ENSG00000128595.17	CALU	44.2242	2.5705	0.00620386	0.0449229
ENSG00000174799.11	CEP135	44.213	5.04985	0.00126582	0.0209066
ENSG00000286140.2	DERPC	44.1021	4.89327	0.00727014	0.0486064
ENSG00000115694.15	STK25	43.8486	3.8502	0.00284993	0.0312843
ENSG00000248333.9	CDK11B	43.8166	5.19236	0.00246461	0.0291635
ENSG00000078618.23	NRDC	43.7367	2.64281	0.00490642	0.0403333
ENSG00000130540.14	SULT4A1	43.5415	4.8666	0.00551164	0.0423573
ENSG00000284707.2	ENSG00000284707	43.483	4.2102	0.00717322	0.0482572
ENSG00000047188.16	YTHDC2	43.4526	2.50904	0.00163139	0.0238586
ENSG00000157181.16	ODR4	43.3927	5.3778	0.000899251	0.0176817
ENSG00000144579.8	CTDSP1	43.135	5.62607	0.000747064	0.0160526
ENSG00000178184.16	PARD6G	43.0771	5.39621	0.00350002	0.0340848
ENSG00000176868.3	ENSG00000176868	42.9105	4.86726	0.0037171	0.0349764
ENSG00000196591.12	HDAC2	42.8987	2.7849	0.000196016	0.00762697
ENSG00000164609.10	SLU7	42.8597	5.54955	0.000593349	0.0141299
ENSG00000162231.14	NXF1	42.8008	2.92972	0.00609796	0.0447183
ENSG00000008405.12	CRY1	42.7432	5.55643	0.000937541	0.0178919
ENSG00000078747.16	ITCH	42.6867	2.49197	0.00134293	0.0213448
ENSG00000074696.13	HACD3	42.4618	3.12621	0.00234195	0.0282145
ENSG00000090621.15	PABPC4	42.4456	2.20485	0.00336192	0.0334181
ENSG00000158526.8	TSR2	42.2283	5.28882	0.00183489	0.0248429
ENSG00000102870.6	ZNF629	42.1916	4.44531	0.00501454	0.0406346
ENSG00000136448.13	NMT1	42.1717	3.36294	0.000974619	0.0184202
ENSG00000100568.11	VTI1B	42.1653	5.84276	0.0002769	0.00916423
ENSG00000177479.20	ARIH2	42.1264	2.34537	0.00453349	0.0386196
ENSG00000110931.19	CAMKK2	41.9941	3.6888	0.00232381	0.028153
ENSG00000092931.12	MFSD11	41.9687	3.52047	0.00629816	0.0452919
ENSG00000116062.18	MSH6	41.9532	2.45511	0.0012458	0.0207745
ENSG00000229807.13	XIST	41.9422	2.81729	3.19007e-06	0.00038811
ENSG00000150776.18	NKAPD1	41.9269	4.40807	0.00483948	0.0400416
ENSG00000087302.9	RTRAF	41.9125	2.52187	0.00652137	0.0462113
ENSG00000131263.13	RLIM	41.8661	2.66328	0.00106236	0.0193041
ENSG00000160075.12	SSU72	41.7584	4.63584	0.00332441	0.0332338
ENSG00000050393.12	MCUR1	41.7386	4.44202	0.00481393	0.0400017
ENSG00000168438.15	CDC40	41.6784	5.8185	0.000347327	0.010204
ENSG00000131375.10	CAPN7	41.607	3.34089	0.0064818	0.046128
ENSG00000163743.14	RCHY1	41.5931	6.02881	0.000151766	0.00630267
ENSG00000169131.13	ZNF354A	41.5876	4.91233	0.0046216	0.0390549
ENSG00000185418.16	TARS3	41.5702	5.48176	0.000738497	0.0159764
ENSG00000165650.12	PDZD8	41.5639	4.13346	0.000368095	0.0105635
ENSG00000147905.18	ZCCHC7	41.5571	5.24838	0.00152285	0.0229971
ENSG00000171612.7	SLC25A33	41.5526	5.23177	0.00252968	0.029475
ENSG00000068078.20	FGFR3	41.529	5.58485	0.00158266	0.0235905
ENSG00000165458.15	INPPL1	41.4951	3.52559	0.00508243	0.0407938
ENSG00000145740.20	SLC30A5	41.467	4.37455	0.00550981	0.0423573
ENSG00000198431.17	TXNRD1	41.342	2.60272	0.00596419	0.0442354
ENSG00000172766.19	NAA16	40.7706	4.33999	0.00571503	0.0433862
ENSG00000138785.16	INTS12	40.7396	5.37603	0.00140188	0.0218581
ENSG00000169567.13	HINT1	40.591	4.62555	0.00435827	0.0378895
ENSG00000053254.16	FOXN3	40.5767	4.27502	0.000369411	0.0105661
ENSG00000198780.13	FAM169A	40.5727	6.07092	0.000123212	0.00548609
ENSG00000100852.14	ARHGAP5	40.1252	3.1823	0.000542566	0.0132767
ENSG00000163428.4	LRRC58	40.081	3.20497	0.00171111	0.0240725
ENSG00000080819.9	CPOX	40.0397	5.07152	0.00346497	0.0338963
ENSG00000130254.12	SAFB2	39.9657	4.34457	0.00602614	0.0445285
ENSG00000275004.4	ZNF280B	39.932	5.58276	0.000672724	0.0151328
ENSG00000136933.17	RABEPK	39.8898	5.0206	0.006957	0.0476563
ENSG00000144357.18	UBR3	39.8524	5.10325	0.000939071	0.0178919
ENSG00000137310.12	TCF19	39.8026	5.05268	0.00228045	0.0278621
ENSG00000129315.11	CCNT1	39.77	3.12005	0.0025353	0.029475
ENSG00000140374.17	ETFA	39.739	3.02855	0.00129014	0.0210667
ENSG00000104164.12	BLOC1S6	39.7089	3.54696	0.00326808	0.0332114
ENSG00000120709.11	FAM53C	39.615	4.61414	0.00280931	0.0310508
ENSG00000187742.15	SECISBP2	39.5944	4.04869	0.000825099	0.0168714
ENSG00000197299.13	BLM	39.4156	2.76354	0.00369677	0.0348828
ENSG00000120063.10	GNA13	39.3113	2.84712	0.00571132	0.0433862
ENSG00000072274.13	TFRC	39.2404	3.16503	0.00220223	0.0272144
ENSG00000148925.11	BTBD10	39.2151	5.03543	0.00244119	0.0290345
ENSG00000121039.10	RDH10	39.2073	5.62732	0.000635219	0.0147105
ENSG00000078246.17	TULP3	39.1586	4.86711	0.00403667	0.0363216
ENSG00000147162.14	OGT	39.0264	3.071	0.00114738	0.0199417
ENSG00000167720.13	SRR	38.87	5.06882	0.00198142	0.0258542
ENSG00000105127.10	AKAP8	38.7925	4.35747	0.0059858	0.0443411
ENSG00000123908.12	AGO2	38.7925	3.72424	4.32839e-05	0.00267062
ENSG00000163946.14	TASOR	38.6823	2.22387	0.00445538	0.038256
ENSG00000174010.10	KLHL15	38.5862	2.92022	0.00572589	0.0433862
ENSG00000117859.19	OSBPL9	38.4424	2.30831	0.00677829	0.0470558
ENSG00000000419.14	DPM1	38.4371	2.90029	0.00740319	0.0492671
ENSG00000138674.17	SEC31A	38.3919	2.90283	0.00181827	0.0248124
ENSG00000027697.16	IFNGR1	38.3225	4.94338	0.00572192	0.0433862
ENSG00000107164.16	FUBP3	38.2873	3.42509	0.0043119	0.0376224
ENSG00000130338.13	TULP4	38.2809	2.35466	0.00209388	0.0264429
ENSG00000180537.13	RNF182	38.2529	5.21269	0.00219333	0.0271948
ENSG00000197579.8	TOPORS	38.119	5.09941	0.00182875	0.0248376
ENSG00000109189.13	USP46	38.0118	2.89983	0.00248367	0.0292125
ENSG00000089234.16	BRAP	37.9593	5.37644	0.00124874	0.0207835
ENSG00000105968.19	H2AZ2	37.8563	4.52518	0.00328841	0.0332338
ENSG00000141429.14	GALNT1	37.627	5.51199	0.000495111	0.0126559
ENSG00000090686.16	USP48	37.6243	3.38615	0.00195833	0.0256304
ENSG00000103365.15	GGA2	37.6237	3.76266	0.00200925	0.0260209
ENSG00000287856.1	ENSG00000287856	37.5888	5.03731	0.0022214	0.027334
ENSG00000065526.12	SPEN	37.5207	2.94797	0.000134423	0.00577686
ENSG00000168802.14	CHTF8	37.3733	4.89323	0.0072365	0.0484941
ENSG00000137710.17	RDX	37.3488	3.83546	0.00141884	0.021964
ENSG00000114999.8	TTL	37.0292	2.66459	0.000237436	0.00841681
ENSG00000141985.9	SH3GL1	37.0134	5.06966	0.00230012	0.0279837
ENSG00000105819.14	PMPCB	36.8105	4.43031	0.00489897	0.0403333
ENSG00000147548.17	NSD3	36.795	2.09832	0.00288522	0.03144
ENSG00000129680.16	MAP7D3	36.7191	2.8718	0.00635816	0.0455782
ENSG00000156273.16	BACH1	36.6874	2.62358	0.00609842	0.0447183
ENSG00000135164.19	DMTF1	36.6208	2.64739	0.00247847	0.0292125
ENSG00000158615.10	PPP1R15B	36.59	3.84649	0.00106376	0.0193041
ENSG00000118454.13	ANKRD13C	36.4087	4.3058	0.00585964	0.0438697
ENSG00000153094.24	BCL2L11	36.2514	5.84171	0.000301435	0.00954028
ENSG00000101972.20	STAG2	36.1937	2.81872	0.000940371	0.0178919
ENSG00000129103.19	SUMF2	36.1628	5.09213	0.00305221	0.0323894
ENSG00000071655.18	MBD3	36.0458	6.06041	0.000223521	0.00811248
ENSG00000138376.11	BARD1	36.026	4.54803	0.00395827	0.0360334
ENSG00000164543.7	STK17A	35.9665	5.55299	0.000729473	0.0159524
ENSG00000068878.15	PSME4	35.9368	2.42636	0.00335257	0.0333635
ENSG00000163933.10	RFT1	35.9038	5.52333	0.00161106	0.0237847
ENSG00000117724.14	CENPF	35.8279	2.59127	0.0012353	0.0206397
ENSG00000137337.16	MDC1	35.7897	2.96432	0.00464381	0.0391349
ENSG00000168234.13	TTC39C	35.7055	5.89143	0.000270832	0.0090326
ENSG00000109519.13	GRPEL1	35.626	5.07006	0.00248566	0.0292125
ENSG00000048991.17	R3HDM1	35.6097	4.60794	0.00272144	0.0304112
ENSG00000119185.13	ITGB1BP1	35.6001	5.75108	0.000504253	0.012811
ENSG00000197961.12	ZNF121	35.4197	3.44767	0.00375292	0.0350841
ENSG00000160710.18	ADAR	35.4019	2.66302	0.0013064	0.021172
ENSG00000204576.12	PRR3	35.1897	5.02596	0.00440974	0.0380815
ENSG00000184787.19	UBE2G2	35.137	5.8777	0.000211419	0.00790581
ENSG00000008952.17	SEC62	34.9905	4.60509	0.00277737	0.0308831
ENSG00000230551.4	ENSG00000230551	34.88	3.11205	0.00326387	0.0332114
ENSG00000066027.12	PPP2R5A	34.6987	5.03651	0.00230981	0.0280621
ENSG00000147419.19	CCDC25	34.6757	5.20295	0.00141423	0.021932
ENSG00000133641.18	C12orf29	34.425	5.5987	0.00135413	0.0213448
ENSG00000105281.12	SLC1A5	34.3626	4.63224	0.00703846	0.0477973
ENSG00000125779.24	PANK2	34.3159	6.23179	8.11775e-05	0.00430192
ENSG00000177150.13	FAM210A	34.3091	5.23184	0.00170074	0.0239696
ENSG00000107341.5	UBE2R2	34.1568	5.20207	0.00147039	0.0224801
ENSG00000044115.21	CTNNA1	34.1137	3.12629	0.00254759	0.0295441
ENSG00000119844.17	AFTPH	33.9747	4.28265	0.0068096	0.0471324
ENSG00000173276.14	ZBTB21	33.9326	3.01389	0.00396316	0.0360334
ENSG00000092020.11	PPP2R3C	33.917	4.97669	0.00534846	0.04181
ENSG00000012983.12	MAP4K5	33.859	3.43346	0.00578285	0.0436645
ENSG00000258441.1	LINC00641	33.7491	5.51148	0.000522167	0.0130327
ENSG00000119906.13	SLF2	33.7475	4.69737	0.00244334	0.0290345
ENSG00000198700.10	IPO9	33.6958	2.50324	0.0022947	0.0279571
ENSG00000116679.16	IVNS1ABP	33.673	4.51847	0.00340757	0.0336396
ENSG00000116918.15	TSNAX	33.5656	5.726	0.000421595	0.011345
ENSG00000117054.15	ACADM	33.5006	3.70279	0.000323291	0.00979854
ENSG00000105854.13	PON2	33.4842	5.02246	0.0058608	0.0438697
ENSG00000286192.1	ENSG00000286192	33.4506	5.53866	0.00082696	0.0168714
ENSG00000084073.10	ZMPSTE24	33.4347	5.06839	0.0018481	0.0248557
ENSG00000173692.14	PSMD1	33.3254	3.19738	0.000140719	0.00594205
ENSG00000178440.8	TIMM23B-AGAP6	33.2494	5.07223	0.00419911	0.0371258
ENSG00000188895.12	MSL1	33.2235	2.87067	0.00674313	0.0469735
ENSG00000058729.11	RIOK2	33.1776	5.44541	0.00117588	0.0201453
ENSG00000104969.11	SGTA	33.1674	3.00908	0.00708868	0.0479123
ENSG00000094916.16	CBX5	33.1121	2.83307	0.000283791	0.00928555
ENSG00000072364.13	AFF4	33.1048	4.00271	0.000523541	0.0130327
ENSG00000119231.11	SENP5	33.0963	4.32783	0.00551045	0.0423573
ENSG00000131732.12	ZCCHC9	32.8035	5.27422	0.00257763	0.0297668
ENSG00000166503.9	HDGFL3	32.7313	2.04485	0.00329259	0.0332338
ENSG00000000003.15	TSPAN6	32.6948	5.08465	0.00195186	0.0255845
ENSG00000112977.16	DAP	32.6053	4.65436	0.00680705	0.0471324
ENSG00000085449.15	WDFY1	32.5723	5.37787	0.000886959	0.0174921
ENSG00000117906.14	RCN2	32.4414	3.21332	0.00153709	0.0231313
ENSG00000130177.16	CDC16	32.4136	4.88659	0.00376383	0.035148
ENSG00000145495.16	MARCHF6	32.1755	2.38766	0.00475826	0.0398451
ENSG00000244462.8	RBM12	32.1705	4.18907	0.00697952	0.0476707
ENSG00000119760.16	SUPT7L	32.1141	5.23184	0.00167449	0.0239079
ENSG00000164144.16	ARFIP1	32.0408	5.03116	0.00310313	0.032537
ENSG00000122068.13	FYTTD1	32.0135	5.87763	0.000208416	0.00790561
ENSG00000100625.9	SIX4	32.0034	5.65491	0.000406765	0.0110492
ENSG00000152749.8	GPR180	32.0025	4.57686	0.00323143	0.0331005
ENSG00000122435.11	TRMT13	31.986	4.90668	0.00368676	0.0348808
ENSG00000025800.14	KPNA6	31.8424	3.39798	0.00471753	0.0395632
ENSG00000184220.12	CMSS1	31.7736	5.74994	0.000696426	0.0154362
ENSG00000104442.10	ARMC1	31.6898	4.65237	0.00497258	0.0404702
ENSG00000138398.17	PPIG	31.5866	2.30626	0.00457795	0.0388833
ENSG00000127483.19	HP1BP3	31.4727	3.14838	0.00367296	0.0348808
ENSG00000143499.14	SMYD2	31.2784	5.19142	0.00261611	0.02992
ENSG00000014824.14	SLC30A9	31.2754	3.29059	0.00649359	0.046128
ENSG00000134759.14	ELP2	31.2655	3.34048	0.0013665	0.0214615
ENSG00000166037.11	CEP57	31.057	4.22997	0.00708508	0.0479123
ENSG00000203668.3	CHML	31.022	4.41042	0.00427304	0.0374346
ENSG00000136824.19	SMC2	30.998	5.5345	0.000520088	0.0130327
ENSG00000213390.11	ARHGAP19	30.9013	5.53456	0.00052257	0.0130327
ENSG00000066136.21	NFYC	30.7879	5.40817	0.00102846	0.0189649
ENSG00000285901.2	ENSG00000285901	30.7435	4.65479	0.0073699	0.0491592
ENSG00000110172.12	CHORDC1	30.7397	2.87506	0.00222839	0.0273737
ENSG00000198900.7	TOP1	30.6544	2.42252	0.00612862	0.0447301
ENSG00000135766.9	EGLN1	30.6317	5.21757	0.00134691	0.0213448
ENSG00000110619.18	CARS1	30.6239	3.7103	0.00240405	0.0288147
ENSG00000149503.13	INCENP	30.5359	4.93067	0.00390728	0.035789
ENSG00000171793.17	CTPS1	30.5234	2.94833	0.00310867	0.032537
ENSG00000160007.19	ARHGAP35	30.3518	2.93736	0.00141323	0.021932
ENSG00000175203.17	DCTN2	30.3296	3.80632	0.00142374	0.0220005
ENSG00000241058.4	NSUN6	30.1781	4.63208	0.00713685	0.04805
ENSG00000235106.10	BRD3OS	30.0065	5.3756	0.00160006	0.023748
ENSG00000161057.13	PSMC2	29.8051	4.50457	0.00374827	0.0350786
ENSG00000181751.10	MACIR	29.7995	4.63307	0.00656956	0.0464245
ENSG00000198836.11	OPA1	29.7509	3.54762	0.0034199	0.0336651
ENSG00000113658.18	SMAD5	29.7509	2.52188	0.00708297	0.0479123
ENSG00000151503.14	NCAPD3	29.6307	2.77416	0.000218709	0.00803194
ENSG00000152332.16	UHMK1	29.5809	6.03418	0.000111624	0.00515618
ENSG00000171517.6	LPAR3	29.5551	4.63135	0.00760628	0.0499793
ENSG00000176148.16	TCP11L1	29.5495	5.37826	0.000819564	0.0168215
ENSG00000138018.19	SELENOI	29.5091	4.34811	0.00503361	0.0406573
ENSG00000143549.21	TPM3	29.4578	2.49744	0.0011604	0.0199979
ENSG00000180667.11	YOD1	29.2839	5.3794	0.000667825	0.0151012
ENSG00000028203.19	VEZT	29.278	3.43508	0.00447249	0.0383267
ENSG00000143442.22	POGZ	29.2422	3.69217	0.00188511	0.0249366
ENSG00000015676.18	NUDCD3	29.2052	3.63315	0.00406002	0.0363775
ENSG00000112406.5	HECA	29.194	5.21908	0.00119296	0.0203251
ENSG00000144028.15	SNRNP200	29.1221	3.26301	0.00134088	0.0213448
ENSG00000126746.18	ZNF384	29.07	5.23181	0.00203869	0.0262057
ENSG00000096060.15	FKBP5	29.0652	3.13234	0.00245706	0.029154
ENSG00000144597.14	EAF1	28.9581	5.09979	0.00184801	0.0248557
ENSG00000151849.16	CENPJ	28.9343	5.26731	0.00165628	0.0238696
ENSG00000008294.22	SPAG9	28.8696	2.07858	0.00743453	0.0494138
ENSG00000116285.13	ERRFI1	28.8692	4.84453	0.00509145	0.0407938
ENSG00000172888.12	ZNF621	28.7853	5.94046	0.000182102	0.00724885
ENSG00000148337.22	CIZ1	28.6502	2.84931	0.00712189	0.0480241
ENSG00000102054.18	RBBP7	28.476	4.18881	0.00704581	0.0478016
ENSG00000139842.15	CUL4A	28.326	5.72742	0.000387708	0.0106934
ENSG00000100038.20	TOP3B	28.0717	5.41731	0.00271135	0.0303769
ENSG00000060749.16	QSER1	28.0381	2.72982	0.00406012	0.0363775
ENSG00000149474.15	KAT14	28.0237	5.05329	0.00210364	0.0264886
ENSG00000005436.14	GCFC2	27.8551	5.09962	0.00183931	0.0248557
ENSG00000075336.12	TIMM21	27.7974	5.07144	0.00339112	0.0335538
ENSG00000138095.20	LRPPRC	27.7561	3.35813	9.60671e-06	0.000898222
ENSG00000070770.10	CSNK2A2	27.6953	3.05244	0.0033123	0.0332338
ENSG00000113580.15	NR3C1	27.6811	2.91114	0.00700564	0.0477245
ENSG00000162601.11	MYSM1	27.5378	2.15733	0.00524589	0.0414207
ENSG00000119900.9	OGFRL1	27.5029	2.86226	0.00689375	0.0475089
ENSG00000225339.4	ENSG00000225339	27.4114	5.6672	0.000402223	0.0109901
ENSG00000180901.11	KCTD2	27.3657	5.06942	0.00220006	0.0272144
ENSG00000198677.12	TTC37	27.349	2.61148	0.00481613	0.0400017
ENSG00000140262.18	TCF12	27.2525	4.50113	0.0045769	0.0388833
ENSG00000203875.13	SNHG5	27.2523	3.35934	0.00325986	0.0332114
ENSG00000136754.18	ABI1	27.1446	4.63396	0.0061241	0.0447301
ENSG00000145391.14	SETD7	27.126	3.0093	0.0010199	0.018946
ENSG00000119638.14	NEK9	27.0997	2.64826	0.00270964	0.0303769
ENSG00000148700.15	ADD3	27.0284	5.37806	0.000852111	0.0171175
ENSG00000125484.12	GTF3C4	27.0273	3.3562	0.0050551	0.0406573
ENSG00000100207.21	TCF20	26.9818	3.46509	0.00463026	0.0390588
ENSG00000141219.16	C17orf80	26.9556	4.92381	0.00331991	0.0332338
ENSG00000187079.20	TEAD1	26.93	4.58403	0.00352821	0.0341813
ENSG00000155729.13	KCTD18	26.9232	4.91113	0.00438957	0.0380694
ENSG00000072422.17	RHOBTB1	26.852	4.88704	0.00389947	0.035789
ENSG00000213699.9	SLC35F6	26.7829	4.63241	0.00693919	0.0476098
ENSG00000236859.8	NIFK-AS1	26.6812	5.07089	0.00297039	0.031953
ENSG00000146842.17	TMEM209	26.662	4.86743	0.00341514	0.0336651
ENSG00000101126.18	ADNP	26.5446	5.74428	0.000269138	0.0090109
ENSG00000082258.13	CCNT2	26.4854	3.33321	0.00745842	0.0494822
ENSG00000080802.20	CNOT4	26.4602	5.48247	0.000716618	0.0157777
ENSG00000108055.11	SMC3	26.4154	2.3615	0.00338455	0.0335272
ENSG00000164070.12	HSPA4L	26.333	3.11324	0.00279971	0.0310448
ENSG00000112249.14	ASCC3	26.3323	4.72487	0.00208134	0.0264003
ENSG00000168297.16	PXK	26.2601	5.04975	0.0036603	0.0348808
ENSG00000114030.13	KPNA1	26.2231	4.32748	0.00529168	0.0416017
ENSG00000099940.12	SNAP29	26.2134	4.99012	0.00352972	0.0341813
ENSG00000119682.18	AREL1	26.1881	5.54905	0.000577736	0.0138936
ENSG00000073614.13	KDM5A	26.0315	3.20222	0.00162465	0.0238263
ENSG00000134480.16	CCNH	25.8238	5.07026	0.00259245	0.0297998
ENSG00000165671.22	NSD1	25.7739	2.15534	0.00149077	0.0225918
ENSG00000179456.11	ZBTB18	25.7235	4.6519	0.0046642	0.0392302
ENSG00000078304.20	PPP2R5C	25.707	3.01523	0.00119701	0.020354
ENSG00000100413.17	POLR3H	25.6187	5.3397	0.00164292	0.0238586
ENSG00000008256.16	CYTH3	25.5344	5.08526	0.00201238	0.0260224
ENSG00000153786.13	ZDHHC7	25.4658	4.61311	0.00668275	0.0467036
ENSG00000075975.17	MKRN2	25.4493	2.83636	0.0069366	0.0476098
ENSG00000118762.8	PKD2	25.4245	5.05368	0.00200172	0.0260209
ENSG00000120693.14	SMAD9	25.4206	5.08511	0.00199765	0.0260209
ENSG00000007168.14	PAFAH1B1	25.3893	3.9163	0.0008782	0.0174388
ENSG00000116574.6	RHOU	25.3888	4.61774	0.00577482	0.0436421
ENSG00000100580.8	TMED8	25.3468	5.52258	0.000459645	0.0120739
ENSG00000103061.13	SLC7A6OS	25.2708	4.90411	0.0033698	0.0334579
ENSG00000148396.19	SEC16A	25.2266	4.6157	0.00316855	0.0328542
ENSG00000119718.11	EIF2B2	25.1623	5.03498	0.00249908	0.0293038
ENSG00000134330.19	IAH1	25.132	5.09659	0.00439534	0.0380702
ENSG00000243943.10	ZNF512	25.0608	4.67556	0.00620433	0.0449229
ENSG00000100441.10	KHNYN	25.043	5.62877	0.000537027	0.0131785
ENSG00000169607.13	CKAP2L	25.0333	5.02826	0.00374018	0.0350409
ENSG00000090316.16	MAEA	24.9597	4.41752	0.00667946	0.0467036
ENSG00000106771.13	TMEM245	24.9051	5.77674	0.00030143	0.00954028
ENSG00000099204.21	ABLIM1	24.7635	2.87196	0.00640928	0.0457927
ENSG00000135597.19	REPS1	24.7291	4.38161	0.00613984	0.0447301
ENSG00000259972.3	ENSG00000259972	24.7143	4.65453	0.00702074	0.0477521
ENSG00000168522.13	FNTA	24.6169	3.42098	0.00486651	0.0401882
ENSG00000163848.20	ZNF148	24.5905	3.46051	0.00388368	0.035789
ENSG00000115825.11	PRKD3	24.4696	3.39287	0.00493664	0.0404563
ENSG00000100403.12	ZC3H7B	24.4656	3.51653	0.00396663	0.0360334
ENSG00000165525.18	NEMF	24.4276	4.30826	0.00613995	0.0447301
ENSG00000141441.16	GAREM1	24.4048	5.40718	0.000956445	0.0181577
ENSG00000064607.17	SUGP2	24.1835	5.52275	0.00055534	0.0135128
ENSG00000141378.15	PTRH2	24.1655	4.6333	0.00645079	0.0460131
ENSG00000073969.18	NSF	24.1048	4.8515	0.00330256	0.0332338
ENSG00000038382.21	TRIO	24.0509	2.24247	0.00626434	0.0452815
ENSG00000091483.8	FH	23.9974	5.68477	0.000516448	0.0130327
ENSG00000132436.12	FIGNL1	23.9659	4.85231	0.00316381	0.0328542
ENSG00000163681.16	SLMAP	23.9131	2.98448	0.00127123	0.0209559
ENSG00000132300.19	PTCD3	23.8357	5.84597	0.000219983	0.00803194
ENSG00000152413.15	HOMER1	23.7956	5.0684	0.00185201	0.0248557
ENSG00000104660.19	LEPROTL1	23.7874	5.03131	0.00307606	0.0325329
ENSG00000125814.17	NAPB	23.7839	4.86757	0.0031979	0.0329636
ENSG00000138796.18	HADH	23.6231	6.12633	0.000239084	0.00842941
ENSG00000145147.20	SLIT2	23.5377	2.88226	0.00682598	0.0471703
ENSG00000011258.16	MBTD1	23.5325	5.34926	0.001014	0.0189178
ENSG00000176915.15	ANKLE2	23.4563	3.56552	0.00042473	0.0113938
ENSG00000167004.14	PDIA3	23.3977	4.58118	0.00369462	0.0348828
ENSG00000110917.8	MLEC	23.3942	5.23198	0.00100953	0.0188752
ENSG00000140525.20	FANCI	23.3933	2.62662	0.00114002	0.0199342
ENSG00000101558.14	VAPA	23.3781	2.58726	0.00761364	0.0499793
ENSG00000169762.17	TAPT1	23.3765	5.45676	0.00115868	0.0199979
ENSG00000075711.21	DLG1	23.2586	3.02455	0.00134856	0.0213448
ENSG00000105939.14	ZC3HAV1	23.2361	5.5227	0.000527954	0.0130672
ENSG00000116001.17	TIA1	23.1451	5.20232	0.00145446	0.0223553
ENSG00000179119.15	SPTY2D1	23.1216	5.06792	0.00171945	0.0240788
ENSG00000102921.8	N4BP1	23.1215	5.39185	0.000929216	0.0178368
ENSG00000234420.8	ZNF37BP	23.0698	4.33903	0.00545403	0.0420642
ENSG00000083099.11	LYRM2	22.9423	5.63026	0.000461262	0.0120739
ENSG00000123352.18	SPATS2	22.8015	5.13642	0.00301211	0.0321615
ENSG00000131828.14	PDHA1	22.7288	4.63565	0.00540566	0.0419534
ENSG00000215908.10	CROCCP2	22.6174	5.02229	0.00595014	0.0442318
ENSG00000139618.17	BRCA2	22.6113	6.07034	0.000109355	0.00507855
ENSG00000113456.19	RAD1	22.4733	5.09951	0.00183383	0.0248429
ENSG00000108474.17	PIGL	22.4464	4.89302	0.00705015	0.0478016
ENSG00000165175.17	MID1IP1	22.4368	4.6548	0.00738523	0.0492235
ENSG00000136935.14	GOLGA1	22.3511	4.9338	0.00424675	0.0373554
ENSG00000105810.10	CDK6	22.2885	4.5431	0.00303019	0.0322668
ENSG00000101181.18	MTG2	22.1366	4.84256	0.00590568	0.0440345
ENSG00000170677.6	SOCS6	22.1101	4.98456	0.00414744	0.0369961
ENSG00000023228.14	NDUFS1	22.092	2.9546	0.00504914	0.0406573
ENSG00000100697.16	DICER1	22.0851	2.40407	0.004971	0.0404702
ENSG00000213516.10	RBMXL1	22.0539	4.67386	0.00579975	0.0436776
ENSG00000110583.13	NAA40	21.9887	4.81803	0.00632905	0.0454072
ENSG00000247556.6	OIP5-AS1	21.8283	3.56464	0.00281932	0.0310628
ENSG00000117533.15	VAMP4	21.7303	4.65401	0.00640226	0.0457804
ENSG00000082898.19	XPO1	21.722	2.18171	0.00186497	0.0248557
ENSG00000120616.16	EPC1	21.6854	3.35487	0.00700398	0.0477245
ENSG00000124198.10	ARFGEF2	21.6092	2.95358	0.00417535	0.0370973
ENSG00000276644.5	DACH1	21.4828	4.69971	0.00630249	0.0452919
ENSG00000151893.15	CACUL1	21.3693	2.95546	0.00421459	0.0372246
ENSG00000103037.12	SETD6	21.3058	5.26304	0.00134092	0.0213448
ENSG00000010322.16	NISCH	21.2841	5.50798	0.000815342	0.0168089
ENSG00000050426.16	LETMD1	21.2741	4.89268	0.00676923	0.0470415
ENSG00000119392.16	GLE1	21.2556	3.35132	0.00603819	0.0445794
ENSG00000122545.21	SEPTIN7	21.2524	2.94804	0.00263668	0.02992
ENSG00000145907.16	G3BP1	21.2451	2.02866	0.00378207	0.0352422
ENSG00000171606.18	ZNF274	21.2095	5.37675	0.00115137	0.0199709
ENSG00000158467.17	AHCYL2	21.0865	5.07044	0.00269373	0.0303766
ENSG00000160285.15	LSS	21.0738	5.07288	0.00514404	0.040991
ENSG00000268173.3	ENSG00000268173	21.0711	4.65407	0.00647083	0.046118
ENSG00000239900.14	ADSL	21.0365	3.46792	0.00518408	0.041234
ENSG00000105647.19	PIK3R2	20.9854	4.65424	0.00666069	0.046673
ENSG00000125863.20	MKKS	20.9113	5.0511	0.00288448	0.03144
ENSG00000111554.15	MDM1	20.8796	5.0254	0.00460178	0.0389707
ENSG00000196455.8	PIK3R4	20.8644	4.67033	0.00510085	0.0407974
ENSG00000112655.16	PTK7	20.6116	5.46609	0.00178357	0.0245326
ENSG00000103275.21	UBE2I	20.5812	3.44588	0.00619949	0.0449229
ENSG00000177082.13	WDR73	20.5182	5.44797	0.00130441	0.021172
ENSG00000112715.26	VEGFA	20.4473	3.71505	0.0030265	0.0322668
ENSG00000144747.17	TMF1	20.399	5.30729	0.00158399	0.0235905
ENSG00000074266.22	EED	20.3195	4.88742	0.00402193	0.0362646
ENSG00000070367.16	EXOC5	20.2703	3.43791	0.00368122	0.0348808
ENSG00000163006.12	CCDC138	20.1525	4.83209	0.00379753	0.035348
ENSG00000167283.9	ATP5MG	20.1275	5.20861	0.00390076	0.035789
ENSG00000102910.14	LONP2	20.0354	5.6072	0.000457834	0.0120739
ENSG00000119314.16	PTBP3	19.9662	5.24446	0.0010881	0.0195154
ENSG00000095002.15	MSH2	19.9495	2.55388	0.00749097	0.0495277
ENSG00000169398.20	PTK2	19.8507	2.96266	0.00397143	0.0360349
ENSG00000137266.15	SLC22A23	19.8439	5.33278	0.00262407	0.02992
ENSG00000163539.18	CLASP2	19.7991	2.39836	0.00637324	0.0456106
ENSG00000132155.14	RAF1	19.7442	2.74808	0.00147782	0.0225537
ENSG00000014919.13	COX15	19.6715	4.63573	0.00537557	0.0418326
ENSG00000129128.13	SPCS3	19.6349	5.09723	0.00172468	0.0240788
ENSG00000270641.1	TSIX	19.5198	4.39046	6.10079e-06	0.0006506
ENSG00000227500.10	SCAMP4	19.5076	4.86675	0.00501465	0.0406346
ENSG00000186812.13	ZNF397	19.3985	5.34597	0.00117775	0.0201453
ENSG00000023902.14	PLEKHO1	19.3582	4.89102	0.00562218	0.0429393
ENSG00000186716.21	BCR	19.3455	3.35	0.00572036	0.0433862
ENSG00000104447.13	TRPS1	19.2698	4.1989	0.00718536	0.0482794
ENSG00000110344.10	UBE4A	19.2662	5.06771	0.00166737	0.0239079
ENSG00000112584.14	FAM120B	19.2451	4.69816	0.0060751	0.0447183
ENSG00000198018.7	ENTPD7	19.2215	5.40354	0.000759137	0.0161824
ENSG00000072062.15	PRKACA	19.2014	5.18244	0.00177686	0.0244792
ENSG00000160908.15	ZNF394	19.1867	5.3092	0.00317207	0.0328542
ENSG00000064933.19	PMS1	19.1826	4.6315	0.0075032	0.049551
ENSG00000197312.12	DDI2	19.151	5.84798	0.000194316	0.00759505
ENSG00000168807.17	SNTB2	19.0991	5.41868	0.000802277	0.016699
ENSG00000125844.17	RRBP1	19.0461	5.0064	0.00395146	0.0360334
ENSG00000185900.11	POMK	18.9779	2.76609	0.00760724	0.0499793
ENSG00000119927.14	GPAM	18.8801	5.48088	0.000767105	0.0162011
ENSG00000175727.14	MLXIP	18.8396	4.50872	0.00349118	0.0340371
ENSG00000101849.18	TBL1X	18.7972	4.46117	0.00406242	0.0363775
ENSG00000104093.14	DMXL2	18.7276	3.46126	0.00399493	0.0361721
ENSG00000134265.13	NAPG	18.6987	4.63214	0.00709727	0.0479329
ENSG00000103494.16	RPGRIP1L	18.6551	4.51489	0.00443166	0.0381282
ENSG00000141279.17	NPEPPS	18.6132	5.91449	0.00023367	0.00841016
ENSG00000076067.13	RBMS2	18.5346	5.32967	0.00125796	0.0208166
ENSG00000171320.15	ESCO2	18.5091	5.07056	0.002763	0.0308349
ENSG00000168137.20	SETD5	18.4641	2.30361	0.00161468	0.0237847
ENSG00000146282.19	RARS2	18.4358	4.79657	0.00241726	0.0288801
ENSG00000127616.20	SMARCA4	18.4176	2.61114	0.00499159	0.0405619
ENSG00000146263.12	MMS22L	18.4057	2.54573	0.00233741	0.0282034
ENSG00000117481.11	NSUN4	18.3889	5.0699	0.00241069	0.0288414
ENSG00000075413.19	MARK3	18.3098	3.51784	0.000754855	0.0161397
ENSG00000165219.23	GAPVD1	18.273	2.84888	0.00605151	0.0446015
ENSG00000198722.15	UNC13B	18.1487	4.80365	0.00180124	0.0246423
ENSG00000128585.18	MKLN1	18.0855	4.32106	0.00505397	0.0406573
ENSG00000000457.14	SCYL3	18.0295	4.91424	0.00503904	0.0406573
ENSG00000157107.14	FCHO2	17.8585	4.65408	0.00648293	0.046128
ENSG00000157600.12	TMEM164	17.7433	4.83044	0.00400214	0.0361929
ENSG00000087263.17	OGFOD1	17.6845	4.66983	0.00501434	0.0406346
ENSG00000066827.16	ZFAT	17.6135	5.20911	0.00359608	0.0345913
ENSG00000166233.15	ARIH1	17.5997	5.05322	0.000909731	0.0177387
ENSG00000011198.10	ABHD5	17.531	4.90556	0.00354291	0.0342706
ENSG00000101191.17	DIDO1	17.5286	3.326	0.00585701	0.0438697
ENSG00000075239.14	ACAT1	17.4794	4.63395	0.00613103	0.0447301
ENSG00000103064.15	SLC7A6	17.4178	4.90032	0.00298793	0.0320222
ENSG00000164172.20	MOCS2	17.3917	4.63518	0.00559334	0.0428326
ENSG00000116962.15	NID1	17.3234	4.62048	0.00532613	0.0417487
ENSG00000164465.19	DCBLD1	17.1292	4.81813	0.00629964	0.0452919
ENSG00000187239.17	FNBP1	17.1157	4.81334	0.00405462	0.0363775
ENSG00000108100.18	CCNY	17.1098	4.63362	0.00628872	0.0452919
ENSG00000184677.18	ZBTB40	17.0968	5.21542	0.00163588	0.0238586
ENSG00000103550.14	KNOP1	17.0361	4.89871	0.00285029	0.0312843
ENSG00000118985.16	ELL2	16.9731	4.85138	0.00332356	0.0332338
ENSG00000177565.18	TBL1XR1	16.8292	5.52264	0.000488968	0.0126081
ENSG00000011021.23	CLCN6	16.7359	5.02423	0.00504653	0.0406573
ENSG00000198015.14	MRPL42	16.7134	3.59363	0.00262507	0.02992
ENSG00000141576.16	RNF157	16.7024	4.90384	0.00333933	0.033292
ENSG00000121741.17	ZMYM2	16.5419	3.28872	0.00690752	0.0475089
ENSG00000122550.18	KLHL7	16.5304	4.81892	0.00609745	0.0447183
ENSG00000018510.18	AGPS	16.481	2.84886	0.00600597	0.0444174
ENSG00000103942.13	HOMER2	16.3782	4.35413	0.00604544	0.0445948
ENSG00000139719.11	VPS33A	16.3645	4.67092	0.00520708	0.0412699
ENSG00000090061.17	CCNK	16.3594	5.07024	0.00258147	0.0297713
ENSG00000139218.18	SCAF11	16.3158	4.31082	0.00531573	0.041743
ENSG00000155111.15	CDK19	16.2832	4.86763	0.00311023	0.032537
ENSG00000090615.16	GOLGA3	16.253	5.8669	0.000214725	0.00792647
ENSG00000116191.19	RALGPS2	16.1886	5.0816	0.00169404	0.0239696
ENSG00000067992.17	PDK3	16.1117	3.04511	0.00322218	0.0331005
ENSG00000261609.8	GAN	16.1036	4.43897	0.00388397	0.035789
ENSG00000140553.18	UNC45A	16.0385	4.67373	0.00577095	0.0436421
ENSG00000005302.19	MSL3	16.0287	5.21145	0.00255856	0.0295861
ENSG00000182903.16	ZNF721	15.9936	4.66733	0.00462279	0.0390549
ENSG00000118873.17	RAB3GAP2	15.9535	2.34183	0.00593251	0.0441767
ENSG00000114062.22	UBE3A	15.9069	3.1278	0.00293459	0.0318056
ENSG00000166411.14	IDH3A	15.8797	4.65227	0.00490361	0.0403333
ENSG00000215424.10	MCM3AP-AS1	15.8308	5.23176	0.00259429	0.0297998
ENSG00000151092.18	NGLY1	15.8304	5.0689	0.00200699	0.0260209
ENSG00000136631.15	VPS45	15.7461	4.63289	0.00667117	0.0466982
ENSG00000164663.15	USP49	15.6004	5.23186	0.00152783	0.0230321
ENSG00000172954.14	LCLAT1	15.5387	4.83346	0.00363913	0.034773
ENSG00000183762.13	KREMEN1	15.5218	4.86727	0.00369908	0.0348828
ENSG00000155393.14	HEATR3	15.5114	4.88322	0.00296666	0.031953
ENSG00000183579.16	ZNRF3	15.5026	4.65344	0.00582627	0.0438392
ENSG00000240445.6	FOXO3B	15.4548	4.63308	0.00656169	0.0464209
ENSG00000010818.10	HIVEP2	15.4333	5.24515	0.0011461	0.0199417
ENSG00000040341.18	STAU2	15.43	4.88609	0.00362155	0.0346817
ENSG00000080546.14	SESN1	15.4189	4.6727	0.00555163	0.042551
ENSG00000122417.16	ODF2L	15.4155	5.37485	0.00208776	0.0264042
ENSG00000140265.14	ZSCAN29	15.3636	4.67121	0.00525854	0.0414786
ENSG00000122359.18	ANXA11	15.0741	4.8872	0.00395157	0.0360334
ENSG00000214517.10	PPME1	15.0234	4.8669	0.00455589	0.0387722
ENSG00000158636.17	EMSY	14.9918	5.37571	0.00154961	0.0232388
ENSG00000091436.17	MAP3K20	14.9743	4.2102	0.00698118	0.0476707
ENSG00000140479.18	PCSK6	14.9692	3.27876	0.00228527	0.0278816
ENSG00000146676.10	PURB	14.8161	5.04121	0.00185846	0.0248557
ENSG00000081913.14	PHLPP1	14.6881	5.01094	0.00329709	0.0332338
ENSG00000128915.12	ICE2	14.5914	3.39653	0.00682379	0.0471703
ENSG00000257267.4	ZNF271P	14.5433	4.65209	0.00478457	0.0399315
ENSG00000170145.5	SIK2	14.4377	5.05444	0.00182767	0.0248376
ENSG00000110514.19	MADD	14.4208	4.84876	0.00386002	0.0357372
ENSG00000197930.13	ERO1A	14.3526	4.65255	0.00509568	0.0407938
ENSG00000100505.14	TRIM9	14.3461	4.89013	0.00513506	0.0409878
ENSG00000114648.12	KLHL18	14.2506	4.61806	0.00571924	0.0433862
ENSG00000224470.9	ATXN1L	14.2286	4.86771	0.00299589	0.0320474
ENSG00000134352.20	IL6ST	14.1278	5.20669	0.00121122	0.020555
ENSG00000163171.8	CDC42EP3	14.1131	5.04837	0.00487155	0.0401914
ENSG00000198363.18	ASPH	14.0486	4.59379	0.00310992	0.032537
ENSG00000085377.15	PREP	13.9604	4.86725	0.00373999	0.0350409
ENSG00000151883.19	PARP8	13.9175	5.05212	0.00246849	0.0291694
ENSG00000167196.14	FBXO22	13.911	5.24814	0.00148679	0.0225711
ENSG00000114739.14	ACVR2B	13.7978	3.21457	0.00666218	0.046673
ENSG00000100077.16	GRK3	13.7585	4.88173	0.00270981	0.0303769
ENSG00000182473.22	EXOC7	13.6729	4.88732	0.0039902	0.0361672
ENSG00000176700.21	SCAND2P	13.5266	5.11328	0.00294732	0.0319034
ENSG00000119402.18	FBXW2	13.4684	5.20893	0.00111272	0.0196652
ENSG00000154114.13	TBCEL	13.4622	4.63601	0.00527097	0.0415047
ENSG00000018408.15	WWTR1	13.4309	4.67219	0.00544702	0.0420477
ENSG00000181827.16	RFX7	13.2253	5.09706	0.00171723	0.0240788
ENSG00000100722.20	ZC3H14	13.1926	2.94149	0.00494112	0.0404563
ENSG00000100749.9	VRK1	13.0255	4.14709	0.000702264	0.0155145
ENSG00000107862.7	GBF1	12.784	4.64429	0.0028134	0.0310508
ENSG00000113048.18	MRPS27	12.6777	2.4053	0.00587489	0.0438991
ENSG00000106443.17	PHF14	12.5846	5.37831	0.000811843	0.0168089
ENSG00000131368.9	MRPS25	12.5415	4.38939	0.00495422	0.0404702
ENSG00000231365.7	WARS2-AS1	12.3941	5.21531	0.00165305	0.0238696
ENSG00000198860.14	TSEN15	12.208	4.86702	0.00425413	0.0373554
ENSG00000100106.22	TRIOBP	12.1988	5.21064	0.00285605	0.0313078
ENSG00000102780.17	DGKH	12.1828	3.33384	0.00543313	0.0420477
ENSG00000164366.4	CCDC127	12.1141	4.8162	0.00684904	0.0472917
ENSG00000151466.12	SCLT1	12.0654	4.65371	0.00608768	0.0447183
ENSG00000205476.9	CCDC85C	11.9493	5.53731	0.000696446	0.0154362
ENSG00000178904.19	DPY19L3	11.9029	4.88452	0.00323415	0.0331005
ENSG00000140577.17	CRTC3	11.9003	5.03353	0.00270423	0.0303769
ENSG00000103544.16	VPS35L	11.807	4.84765	0.00412965	0.0368893
ENSG00000153933.10	DGKE	11.7461	4.88791	0.00419	0.0371096
ENSG00000152894.15	PTPRK	11.695	4.63595	0.00529293	0.0416017
ENSG00000119397.19	CNTRL	11.4838	3.45055	0.00492247	0.0404185
ENSG00000078043.16	PIAS2	11.4375	5.5361	0.00060843	0.0142816
ENSG00000134313.17	KIDINS220	11.3998	3.23434	0.00167766	0.0239136
ENSG00000263001.8	GTF2I	11.3532	4.88449	0.00322691	0.0331005
ENSG00000023516.9	AKAP11	11.315	4.66538	0.0043568	0.0378895
ENSG00000171365.17	CLCN5	11.2006	4.88428	0.00318166	0.032914
ENSG00000180773.15	SLC36A4	11.1595	4.65299	0.00544342	0.0420477
ENSG00000131089.17	ARHGEF9	11.0965	5.2927	0.00263939	0.02992
ENSG00000159658.15	EFCAB14	11.0703	5.39114	0.00081402	0.0168089
ENSG00000170946.15	DNAJC24	11.0186	4.63189	0.00725277	0.0485278
ENSG00000244754.9	N4BP2L2	10.9948	4.42231	0.00458908	0.0389395
ENSG00000147601.15	TERF1	10.959	5.2872	0.00172138	0.0240788
ENSG00000136143.16	SUCLA2	10.8614	4.63492	0.0057001	0.0433862
ENSG00000092108.22	SCFD1	10.8535	6.18617	0.000108256	0.00505466
ENSG00000176542.10	USF3	10.8516	5.19187	0.00132982	0.0213448
ENSG00000138650.9	PCDH10	10.6411	4.65397	0.00636741	0.0456067
ENSG00000163110.15	PDLIM5	10.5324	4.82912	0.00417871	0.0370973
ENSG00000166949.17	SMAD3	10.4706	4.6353	0.0055442	0.042551
ENSG00000129292.21	PHF20L1	10.3662	3.27841	0.00694801	0.0476325
ENSG00000104343.21	UBE2W	10.3542	4.66874	0.00483636	0.0400416
ENSG00000149311.20	ATM	10.0308	2.31016	0.00610374	0.0447194
ENSG00000095951.17	HIVEP1	9.84529	4.65271	0.00521966	0.0413267
ENSG00000158290.19	CUL4B	9.7942	2.21576	0.00618643	0.0449229
ENSG00000099810.21	MTAP	9.6534	4.89965	0.00292949	0.0317901
ENSG00000104375.17	STK3	9.57193	4.84626	0.00451897	0.0385339
ENSG00000171488.15	LRRC8C	9.56909	4.67293	0.00559828	0.0428326
ENSG00000117139.18	KDM5B	9.50533	3.32401	0.00520416	0.0412699
ENSG00000112893.10	MAN2A1	9.2862	4.63443	0.00590831	0.0440345
ENSG00000196233.14	LCOR	9.13743	5.98078	0.000125829	0.00554546
ENSG00000275066.5	SYNRG	9.00973	4.88322	0.00296686	0.031953
ENSG00000112394.18	SLC16A10	8.95848	4.61091	0.00719888	0.0482794
ENSG00000083799.18	CYLD	8.66183	4.66839	0.00478086	0.0399315
ENSG00000107669.19	ATE1	8.57509	5.0405	0.0019162	0.0251935
ENSG00000175054.16	ATR	8.54933	4.32044	0.00564292	0.0430597
ENSG00000058056.10	USP13	8.2893	5.0392	0.00203133	0.0261665
ENSG00000163945.19	UVSSA	8.03822	4.93275	0.00412734	0.0368893
ENSG00000131844.17	MCCC2	7.91421	5.24596	0.00122339	0.0206397
ENSG00000173852.16	DPY19L1	7.85589	4.63567	0.00539882	0.041938
ENSG00000084112.15	SSH1	7.71688	4.66852	0.00480151	0.0399956
ENSG00000136104.21	RNASEH2B	7.5752	5.65896	0.001347	0.0213448
ENSG00000101745.17	ANKRD12	7.24666	4.59861	0.00620204	0.0449229
ENSG00000124788.19	ATXN1	7.09525	5.0392	0.00203158	0.0261665
ENSG00000109654.16	TRIM2	7.06635	4.63572	0.005381	0.0418372
ENSG00000124942.14	AHNAK	6.5923	4.8813	0.00264313	0.0299231
ENSG00000123191.16	ATP7B	6.41454	4.84203	0.00615931	0.0448223
ENSG00000100784.12	RPS6KA5	4.00929	4.67154	0.00532091	0.0417457
ENSG00000049759.20	NEDD4L	3.06499	4.63302	0.00660081	0.0465072

## Sheet: Fig.1d
EPN24-IGF2BP1 versus EPN24-GFP enrichment analysis results in HEK293T, related to Fig.1d
gene_id	gene_symbol	CPM	log2FoldChange	pvalue	padj
ENSG00000069275.13	NUCKS1	3334.47	7.56965	0	0
ENSG00000159217.10	IGF2BP1	50427.9	7.7073	0	0
ENSG00000229807.13	XIST	1961.61	7.15451	0	0
ENSG00000126016.17	AMOT	1547.48	7.61766	1.05818e-296	8.38182e-293
ENSG00000070756.17	PABPC1	1264.05	6.77676	1.72049e-274	1.09024e-270
ENSG00000094916.16	CBX5	1465.06	7.5252	1.03745e-269	5.47844e-266
ENSG00000065526.12	SPEN	1536.24	7.95545	1.69273e-265	7.66176e-262
ENSG00000142864.15	SERBP1	1891.55	7.34494	1.3534e-264	5.36013e-261
ENSG00000133124.12	IRS4	1383.73	8.0419	3.88807e-254	1.36877e-250
ENSG00000120137.7	PANK3	1530.63	7.92967	1.02875e-248	3.25949e-245
ENSG00000135387.21	CAPRIN1	1146.67	7.56093	5.58602e-248	1.60898e-244
ENSG00000154380.19	ENAH	1182.3	7.19706	1.42515e-247	3.76287e-244
ENSG00000127022.16	CANX	1150.67	7.25713	3.09141e-243	7.53447e-240
ENSG00000100201.23	DDX17	1061.21	7.35837	4.84635e-243	1.0968e-239
ENSG00000164924.18	YWHAZ	1395.29	7.39253	2.68286e-242	5.66692e-239
ENSG00000173726.11	TOMM20	1052.95	7.69763	3.56769e-241	7.06492e-238
ENSG00000196230.14	TUBB	887.976	6.95152	2.60422e-236	4.85366e-233
ENSG00000009307.17	CSDE1	1436.21	7.12303	2.01838e-233	3.5528e-230
ENSG00000172466.16	ZNF24	1244.07	7.81739	2.23704e-230	3.73043e-227
ENSG00000099194.6	SCD	951.309	7.359	2.06592e-228	3.27283e-225
ENSG00000148730.7	EIF4EBP2	824.286	7.37046	8.72518e-220	1.31642e-216
ENSG00000060749.16	QSER1	953.562	7.71515	1.88849e-217	2.71978e-214
ENSG00000165732.14	DDX21	1079.68	7.40449	6.93784e-216	9.55733e-213
ENSG00000153187.20	HNRNPU	1138.68	6.82153	3.26546e-215	4.31095e-212
ENSG00000185900.11	POMK	880.936	7.88931	4.47547e-211	5.67203e-208
ENSG00000108256.9	NUFIP2	979.65	8.02156	2.25346e-210	2.7461e-207
ENSG00000117523.18	PRRC2C	1092.46	7.43642	1.41945e-209	1.6657e-206
ENSG00000198034.11	RPS4X	845.593	5.99528	1.55698e-209	1.76183e-206
ENSG00000105887.11	MTPN	1004.72	7.72009	6.91266e-209	7.55244e-206
ENSG00000108953.17	YWHAE	965.945	6.88613	9.77419e-207	1.03228e-203
ENSG00000084090.14	STARD7	875.429	7.45232	1.18445e-205	1.21059e-202
ENSG00000110321.19	EIF4G2	1074.32	7.02528	1.82685e-205	1.80881e-202
ENSG00000167978.17	SRRM2	994.273	7.16339	2.98218e-205	2.86326e-202
ENSG00000111371.16	SLC38A1	911.242	7.53194	1.41168e-203	1.31552e-200
ENSG00000134333.14	LDHA	755.135	7.04315	3.31246e-203	2.99863e-200
ENSG00000123908.12	AGO2	781.257	7.41071	1.14768e-202	1.01008e-199
ENSG00000174748.22	RPL15	868.808	6.23324	1.41087e-202	1.20816e-199
ENSG00000168175.15	MAPK1IP1L	889.171	7.85513	1.66332e-202	1.38686e-199
ENSG00000090060.19	PAPOLA	741.624	6.68039	1.41856e-199	1.15245e-196
ENSG00000196233.14	LCOR	1004.89	7.59079	4.22086e-199	3.34334e-196
ENSG00000187109.15	NAP1L1	696.153	6.77487	4.97115e-198	3.84161e-195
ENSG00000118058.24	KMT2A	854.496	7.42712	1.9501e-195	1.47112e-192
ENSG00000170027.7	YWHAG	873.121	7.99162	4.85405e-195	3.57665e-192
ENSG00000174444.15	RPL4	930.494	6.22103	1.77391e-194	1.27738e-191
ENSG00000124767.7	GLO1	870.046	7.70538	9.22968e-194	6.49851e-191
ENSG00000163597.16	SNHG16	681.343	7.23235	2.8104e-193	1.93575e-190
ENSG00000185591.10	SP1	781.863	7.94737	4.18823e-193	2.8234e-190
ENSG00000025800.14	KPNA6	711.906	7.53624	2.80866e-192	1.85395e-189
ENSG00000029363.17	BCLAF1	1001.69	7.30613	3.13484e-192	2.02703e-189
ENSG00000215301.11	DDX3X	1073.32	7.57748	1.08169e-191	6.85443e-189
ENSG00000119335.18	SET	837.483	6.89949	3.23738e-190	2.01124e-187
ENSG00000063046.18	EIF4B	707.977	6.86308	6.79728e-190	4.14163e-187
ENSG00000121579.14	NAA50	848.572	7.31697	1.07179e-189	6.40727e-187
ENSG00000099942.13	CRKL	847.914	7.97828	1.27145e-189	7.4601e-187
ENSG00000168028.14	RPSA	918.742	5.98612	1.64327e-189	9.46644e-187
ENSG00000145907.16	G3BP1	823.956	7.7204	2.95739e-189	1.67325e-186
ENSG00000170144.21	HNRNPA3	804.101	6.76135	3.10323e-188	1.72496e-185
ENSG00000168137.20	SETD5	772.991	6.89411	3.31619e-188	1.81156e-185
ENSG00000143742.14	SRP9	724.175	7.16024	2.64874e-187	1.42242e-184
ENSG00000102908.22	NFAT5	670.266	7.5216	2.1412e-186	1.1307e-183
ENSG00000135486.19	HNRNPA1	740.038	6.46488	2.73619e-186	1.42121e-183
ENSG00000128989.11	ARPP19	766.492	7.82878	5.91675e-186	3.02365e-183
ENSG00000138757.15	G3BP2	619.176	7.21166	7.30778e-186	3.67523e-183
ENSG00000131263.13	RLIM	802.026	7.58087	1.21033e-184	5.99189e-182
ENSG00000253352.10	TUG1	741.748	7.71941	1.46751e-183	7.15334e-181
ENSG00000168385.18	SEPTIN2	691.523	7.04225	1.05475e-182	5.06343e-180
ENSG00000064393.16	HIPK2	607.644	7.22879	1.19982e-182	5.6739e-180
ENSG00000108424.11	KPNB1	634.293	6.81298	1.0051e-181	4.68319e-179
ENSG00000114978.18	MOB1A	616.33	7.24996	5.23151e-179	2.40225e-176
ENSG00000083312.19	TNPO1	645.623	7.31772	7.30737e-179	3.30752e-176
ENSG00000155506.19	LARP1	624.233	6.92625	1.01159e-178	4.51427e-176
ENSG00000136381.13	IREB2	827.364	7.57996	8.44744e-178	3.71734e-175
ENSG00000160131.14	VMA21	679.637	7.56905	1.18658e-177	5.15007e-175
ENSG00000072364.13	AFF4	801.179	7.78094	1.58108e-177	6.7696e-175
ENSG00000121644.19	DESI2	726.491	7.75991	4.09583e-177	1.7303e-174
ENSG00000205339.10	IPO7	768.775	7.45626	4.27122e-177	1.78065e-174
ENSG00000198315.11	ZKSCAN8	634.381	7.47192	6.14424e-177	2.52823e-174
ENSG00000055609.21	KMT2C	780.824	6.60917	7.0785e-177	2.87532e-174
ENSG00000091527.17	CDV3	741.067	7.87732	7.29211e-177	2.9246e-174
ENSG00000120063.10	GNA13	666.107	7.71506	8.03119e-177	3.18075e-174
ENSG00000118971.9	CCND2	624.069	7.61724	1.09426e-176	4.2803e-174
ENSG00000108510.10	MED13	937.873	7.9155	2.27178e-176	8.77793e-174
ENSG00000126003.7	PLAGL2	549.001	7.59515	5.19306e-176	1.98237e-173
ENSG00000178695.6	KCTD12	663.594	7.56491	7.70042e-176	2.90453e-173
ENSG00000183779.7	ZNF703	637.002	7.68275	9.94329e-176	3.70639e-173
ENSG00000110958.16	PTGES3	726.794	7.70132	9.14867e-175	3.37054e-172
ENSG00000162521.19	RBBP4	597.949	6.94099	1.56416e-174	5.69642e-172
ENSG00000092199.19	HNRNPC	731.05	7.18413	3.90954e-174	1.40761e-171
ENSG00000128050.9	PAICS	585.746	7.25177	4.88409e-174	1.73874e-171
ENSG00000056586.16	RC3H2	723.127	7.6641	5.35415e-174	1.8849e-171
ENSG00000095787.24	WAC	695.857	7.72019	5.78684e-174	2.01484e-171
ENSG00000260032.2	NORAD	776.192	7.8235	7.18764e-174	2.47536e-171
ENSG00000198265.12	HELZ	543.06	7.06544	2.03414e-173	6.93009e-171
ENSG00000125484.12	GTF3C4	681.333	7.78425	1.41185e-172	4.75884e-170
ENSG00000167658.16	EEF2	1180.03	6.03609	1.4848e-172	4.95206e-170
ENSG00000114739.14	ACVR2B	600.944	6.93089	8.3662e-172	2.76119e-169
ENSG00000160551.12	TAOK1	711.086	7.93968	2.5456e-171	8.31494e-169
ENSG00000080824.19	HSP90AA1	1142.62	6.47563	2.83067e-171	9.15173e-169
ENSG00000100664.11	EIF5	835.504	7.55969	3.7067e-171	1.18629e-168
ENSG00000130741.11	EIF2S3	536.289	7.09652	1.33787e-170	4.23891e-168
ENSG00000123505.19	AMD1	793.532	8.12635	2.02027e-170	6.33766e-168
ENSG00000143756.12	FBXO28	707.027	7.71412	2.95356e-170	9.17457e-168
ENSG00000095139.15	ARCN1	642.293	7.79423	6.74591e-170	2.07512e-167
ENSG00000113300.13	CNOT6	596.9	7.68734	8.47471e-170	2.58185e-167
ENSG00000055208.19	TAB2	661.334	7.90123	1.96341e-169	5.92463e-167
ENSG00000186298.12	PPP1CC	587.265	7.36328	3.31717e-169	9.91522e-167
ENSG00000157741.15	UBN2	590.038	6.79881	3.71808e-169	1.10097e-166
ENSG00000213064.10	SFT2D2	524.995	7.19377	3.91558e-169	1.14871e-166
ENSG00000213281.5	NRAS	587.741	7.54318	1.1525e-168	3.35008e-166
ENSG00000163428.4	LRRC58	653.105	7.92145	3.36031e-167	9.67892e-165
ENSG00000100354.21	TNRC6B	554.353	7.19597	4.14198e-167	1.18229e-164
ENSG00000184007.22	PTP4A2	579.857	7.14429	5.9297e-167	1.67747e-164
ENSG00000113194.13	FAF2	582.387	7.48901	8.54758e-167	2.39665e-164
ENSG00000141425.18	RPRD1A	666.982	7.22643	2.52136e-166	7.00761e-164
ENSG00000169905.13	TOR1AIP2	628.619	7.5427	2.57838e-166	7.10377e-164
ENSG00000112531.17	QKI	547.274	7.05644	1.38279e-164	3.77691e-162
ENSG00000135679.27	MDM2	724.648	7.59329	2.20435e-164	5.96947e-162
ENSG00000165671.22	NSD1	569.648	7.39995	2.5442e-164	6.8314e-162
ENSG00000165997.5	ARL5B	719.069	8.06003	2.82066e-164	7.51007e-162
ENSG00000153561.13	RMND5A	592.049	7.64309	5.06366e-164	1.33697e-161
ENSG00000143384.14	MCL1	724.144	8.06933	5.1966e-164	1.36074e-161
ENSG00000160208.13	RRP1B	581.842	7.28707	3.81089e-163	9.89707e-161
ENSG00000145391.14	SETD7	532.669	7.09835	6.19742e-163	1.59642e-160
ENSG00000172795.17	DCP2	632.244	7.49593	1.94519e-162	4.97028e-160
ENSG00000110395.7	CBL	528.264	7.54369	3.52751e-162	8.94125e-160
ENSG00000173674.11	EIF1AX	641.17	7.60362	3.89343e-162	9.79044e-160
ENSG00000138443.17	ABI2	482.345	6.99931	8.38396e-162	2.09163e-159
ENSG00000100030.15	MAPK1	645.012	8.13439	1.37039e-161	3.39214e-159
ENSG00000132475.10	H3-3B	541.622	7.19099	1.44103e-161	3.53934e-159
ENSG00000163960.12	UBXN7	503.286	7.16783	2.03654e-160	4.96352e-158
ENSG00000179295.19	PTPN11	541.073	6.99079	2.74913e-160	6.64912e-158
ENSG00000132466.20	ANKRD17	543.404	7.39324	7.24676e-160	1.73944e-157
ENSG00000134758.14	RNF138	785.885	7.70641	7.39236e-160	1.75852e-157
ENSG00000072501.19	SMC1A	528.27	6.35279	7.43726e-160	1.75852e-157
ENSG00000146223.16	RPL7L1	572.999	7.34874	1.01061e-159	2.37186e-157
ENSG00000116489.13	CAPZA1	546.704	7.42847	1.80965e-159	4.21596e-157
ENSG00000143761.16	ARF1	616.673	6.68097	4.25321e-159	9.83639e-157
ENSG00000147140.17	NONO	515.035	6.65121	6.15521e-159	1.4132e-156
ENSG00000152102.18	FAM168B	515.758	7.47488	6.82027e-159	1.55463e-156
ENSG00000151893.15	CACUL1	503.109	7.40043	7.48127e-159	1.69312e-156
ENSG00000141367.12	CLTC	575.465	7.25352	1.33704e-158	3.00444e-156
ENSG00000136450.13	SRSF1	665.317	7.51277	1.7652e-158	3.93863e-156
ENSG00000157106.18	SMG1	464.622	6.82299	2.64612e-158	5.86292e-156
ENSG00000125107.19	CNOT1	601.959	6.98134	3.58692e-158	7.89221e-156
ENSG00000181163.14	NPM1	791.17	6.3368	4.52083e-157	9.87849e-155
ENSG00000205765.10	C5orf51	551.69	7.61396	7.04774e-157	1.52946e-154
ENSG00000179195.16	ZNF664	525.05	7.04675	2.63365e-156	5.67649e-154
ENSG00000117020.19	AKT3	475.355	7.19521	2.82847e-156	6.05522e-154
ENSG00000196305.19	IARS1	475.525	6.76236	6.90793e-156	1.46893e-153
ENSG00000110367.14	DDX6	563.112	7.29861	1.2671e-155	2.67645e-153
ENSG00000080345.18	RIF1	590.667	7.58129	2.48078e-155	5.20536e-153
ENSG00000156531.18	PHF6	541.34	7.54315	3.22816e-155	6.72901e-153
ENSG00000062485.19	CS	453.389	6.95871	3.69335e-155	7.64837e-153
ENSG00000159873.10	CCDC117	652.558	8.10895	3.76862e-155	7.75356e-153
ENSG00000007168.14	PAFAH1B1	534.407	7.17608	9.14924e-155	1.87022e-152
ENSG00000143476.18	DTL	664.761	7.88146	9.86587e-155	2.00378e-152
ENSG00000143190.23	POU2F1	552.613	7.41639	1.40103e-154	2.82741e-152
ENSG00000147274.14	RBMX	563.142	7.032	1.86091e-154	3.73172e-152
ENSG00000101752.13	MIB1	562.794	6.93471	1.96115e-154	3.908e-152
ENSG00000203930.13	LINC00632	318.705	6.03099	2.1964e-154	4.34942e-152
ENSG00000161813.23	LARP4	487.244	7.39388	7.26497e-154	1.42971e-151
ENSG00000114439.19	BBX	533.902	7.30924	1.78688e-153	3.49478e-151
ENSG00000168092.14	PAFAH1B2	585.189	7.56664	2.81782e-153	5.47728e-151
ENSG00000129315.11	CCNT1	530.18	7.8139	6.40418e-153	1.23726e-150
ENSG00000162923.17	WDR26	550.083	7.51035	7.04966e-152	1.35371e-149
ENSG00000124795.17	DEK	648.972	7.30537	8.35203e-152	1.59413e-149
ENSG00000101266.19	CSNK2A1	499.657	6.9163	1.07583e-151	2.04112e-149
ENSG00000188529.15	SRSF10	562.464	7.29512	1.83319e-151	3.45731e-149
ENSG00000120705.13	ETF1	569.577	7.313	2.07764e-151	3.89515e-149
ENSG00000163320.12	CGGBP1	587.465	7.73444	2.24949e-151	4.19253e-149
ENSG00000109685.19	NSD2	414.286	6.60471	2.35815e-151	4.36933e-149
ENSG00000163714.18	U2SURP	525.626	7.26557	2.68926e-151	4.95387e-149
ENSG00000118816.11	CCNI	525.52	7.19925	6.04875e-151	1.1078e-148
ENSG00000182831.12	C16orf72	519.275	7.62045	7.38807e-151	1.34531e-148
ENSG00000054598.9	FOXC1	627.892	7.75901	9.13927e-151	1.65468e-148
ENSG00000123416.15	TUBA1B	382.942	6.38382	1.69297e-150	3.04772e-148
ENSG00000123575.9	FAM199X	550.27	7.37816	7.74533e-150	1.38646e-147
ENSG00000180957.19	PITPNB	451.772	6.98399	1.56105e-149	2.77867e-147
ENSG00000124486.14	USP9X	614.743	7.48689	1.64992e-149	2.92045e-147
ENSG00000173812.11	EIF1	496.996	7.09327	4.64258e-149	8.17198e-147
ENSG00000164466.13	SFXN1	518.762	7.54994	7.09054e-149	1.2412e-146
ENSG00000067560.14	RHOA	496.209	6.54109	8.8825e-149	1.54634e-146
ENSG00000176542.10	USF3	413.467	7.18936	2.63133e-148	4.5558e-146
ENSG00000186660.15	ZFP91	544.445	7.93729	4.40824e-148	7.5908e-146
ENSG00000189403.15	HMGB1	490.833	6.78534	8.14016e-148	1.39412e-145
ENSG00000065978.19	YBX1	526.966	6.161	1.02646e-147	1.74851e-145
ENSG00000189091.13	SF3B3	388.431	6.38664	1.76342e-147	2.97698e-145
ENSG00000118922.18	KLF12	544.909	7.89024	1.76642e-147	2.97698e-145
ENSG00000163602.12	RYBP	492.156	7.62453	3.27786e-147	5.495e-145
ENSG00000166233.15	ARIH1	465.367	7.23083	4.44402e-147	7.41075e-145
ENSG00000251562.9	MALAT1	480.829	7.18865	9.92033e-147	1.64563e-144
ENSG00000113658.18	SMAD5	531.954	7.62929	1.16727e-146	1.92623e-144
ENSG00000177565.18	TBL1XR1	478.706	7.33617	1.38671e-146	2.2765e-144
ENSG00000124783.14	SSR1	489.945	7.61574	1.45659e-146	2.3789e-144
ENSG00000138758.12	SEPTIN11	378.857	6.89711	2.14003e-146	3.47716e-144
ENSG00000109332.20	UBE2D3	530.862	7.03957	3.56938e-146	5.77001e-144
ENSG00000159023.22	EPB41	363.514	6.39487	3.78752e-146	6.09156e-144
ENSG00000082701.17	GSK3B	408.842	7.24378	1.79588e-145	2.87378e-143
ENSG00000122406.14	RPL5	435.479	6.31994	2.60758e-145	4.15169e-143
ENSG00000075624.17	ACTB	458.069	5.99827	3.24889e-145	5.1469e-143
ENSG00000116747.13	RO60	610.123	7.92845	4.10841e-145	6.47616e-143
ENSG00000004897.12	CDC27	516.964	7.51696	5.95583e-145	9.3418e-143
ENSG00000134308.14	YWHAQ	503.097	7.58774	6.82069e-145	1.06457e-142
ENSG00000129351.17	ILF3	494.926	6.81847	8.76015e-145	1.36057e-142
ENSG00000005810.20	MYCBP2	514.49	6.67679	8.94141e-145	1.38195e-142
ENSG00000135821.19	GLUL	410.2	6.68517	9.0898e-145	1.39806e-142
ENSG00000187079.20	TEAD1	461.33	7.6107	1.27164e-144	1.94641e-142
ENSG00000169018.6	FEM1B	651.869	7.99829	5.88883e-144	8.97028e-142
ENSG00000060237.19	WNK1	543.873	7.24828	6.38596e-144	9.68099e-142
ENSG00000173473.11	SMARCC1	487.33	5.95674	1.18233e-143	1.78385e-141
ENSG00000104331.9	BPNT2	468.739	7.51701	1.40403e-143	2.10831e-141
ENSG00000113569.16	NUP155	460.861	7.06701	7.53538e-143	1.12618e-140
ENSG00000139514.13	SLC7A1	433.117	7.22521	8.28881e-143	1.23297e-140
ENSG00000119547.6	ONECUT2	420.647	7.21454	1.15115e-142	1.70435e-140
ENSG00000149187.19	CELF1	431.836	7.05561	1.80514e-142	2.66019e-140
ENSG00000198015.14	MRPL42	408.023	6.83443	2.74798e-142	4.03088e-140
ENSG00000133226.18	SRRM1	452.742	6.58768	3.76134e-142	5.4919e-140
ENSG00000117505.13	DR1	494.119	7.28602	7.37394e-142	1.07172e-139
ENSG00000100380.15	ST13	386.683	6.39955	1.05129e-141	1.52096e-139
ENSG00000152749.8	GPR180	430.422	7.11334	1.07121e-141	1.54274e-139
ENSG00000093000.19	NUP50	469.528	7.34192	1.44838e-141	2.07649e-139
ENSG00000143157.12	POGK	483.941	7.31137	1.54941e-141	2.21133e-139
ENSG00000166913.13	YWHAB	417.66	7.31073	1.82018e-141	2.58612e-139
ENSG00000089009.16	RPL6	381.949	6.07311	2.03547e-140	2.8791e-138
ENSG00000160710.18	ADAR	429.751	6.75771	3.85067e-140	5.42242e-138
ENSG00000135316.19	SYNCRIP	434.67	7.16832	4.04313e-140	5.66825e-138
ENSG00000179051.14	RCC2	403.761	7.18662	4.06967e-140	5.68032e-138
ENSG00000088247.19	KHSRP	343.307	6.45589	4.25335e-140	5.91067e-138
ENSG00000183530.14	PRR14L	472.57	7.60167	4.65504e-140	6.43529e-138
ENSG00000131467.12	PSME3	387.059	6.90701	4.6715e-140	6.43529e-138
ENSG00000162601.11	MYSM1	465.184	6.92627	4.74497e-140	6.50821e-138
ENSG00000101972.20	STAG2	473.062	6.66985	4.77155e-140	6.51646e-138
ENSG00000092847.13	AGO1	325.42	6.16874	2.21692e-139	3.01463e-137
ENSG00000225733.7	FGD5-AS1	461.294	7.6155	2.2769e-139	3.08296e-137
ENSG00000123684.13	LPGAT1	463.47	7.42935	4.52664e-139	6.10307e-137
ENSG00000086758.16	HUWE1	509.29	5.77443	5.47384e-139	7.34886e-137
ENSG00000100811.14	YY1	423.169	7.48293	1.42323e-138	1.90269e-136
ENSG00000111605.18	CPSF6	448.156	7.38155	1.48689e-138	1.97943e-136
ENSG00000116237.16	ICMT	500.168	7.89997	1.64569e-138	2.18167e-136
ENSG00000181450.18	ZNF678	475.641	7.26334	5.12075e-138	6.76024e-136
ENSG00000119318.13	RAD23B	501.157	7.4401	9.26495e-138	1.21805e-135
ENSG00000112245.13	PTP4A1	448.992	7.60979	1.37282e-137	1.79737e-135
ENSG00000119314.16	PTBP3	448.008	7.33673	1.57072e-137	2.04801e-135
ENSG00000105810.10	CDK6	422.757	7.52598	2.08381e-137	2.70588e-135
ENSG00000143569.19	UBAP2L	384.249	6.80351	4.90876e-137	6.34813e-135
ENSG00000158290.19	CUL4B	340.317	6.04883	7.22277e-137	9.3027e-135
ENSG00000152332.16	UHMK1	641.578	8.26258	7.55588e-137	9.69233e-135
ENSG00000137154.13	RPS6	490.324	5.3549	9.95548e-137	1.27189e-134
ENSG00000157540.22	DYRK1A	416.568	7.10897	1.18322e-136	1.50559e-134
ENSG00000184009.13	ACTG1	461.908	6.02215	3.41798e-136	4.33182e-134
ENSG00000180667.11	YOD1	527.292	8.02448	4.9099e-136	6.19605e-134
ENSG00000100320.24	RBFOX2	382.128	7.07246	4.92806e-136	6.19605e-134
ENSG00000082898.19	XPO1	432.572	7.12585	5.55523e-136	6.957e-134
ENSG00000103342.13	GSPT1	411.978	7.12277	5.90452e-136	7.3653e-134
ENSG00000004455.18	AK2	383.14	6.38859	1.31284e-135	1.63122e-133
ENSG00000168214.22	RBPJ	422.13	7.43554	1.33842e-135	1.6565e-133
ENSG00000197961.12	ZNF121	494.998	7.59383	1.45036e-135	1.78807e-133
ENSG00000055917.16	PUM2	416.389	7.4251	1.49194e-135	1.83219e-133
ENSG00000205189.12	ZBTB10	495.196	7.67754	1.63135e-135	1.99567e-133
ENSG00000139644.13	TMBIM6	428.278	7.37919	1.67357e-135	2.03943e-133
ENSG00000005889.16	ZFX	529.091	7.94152	1.81634e-135	2.20493e-133
ENSG00000206053.13	JPT2	433.479	7.32867	3.17265e-135	3.83672e-133
ENSG00000100697.16	DICER1	498.856	7.77071	4.16573e-135	5.01851e-133
ENSG00000197312.12	DDI2	370.466	7.10177	7.32675e-135	8.79321e-133
ENSG00000116984.15	MTR	356.709	6.5398	8.36946e-135	1.00067e-132
ENSG00000124422.12	USP22	455.598	7.43613	1.01879e-134	1.21351e-132
ENSG00000159140.22	SON	478.502	7.39523	1.18223e-134	1.40291e-132
ENSG00000204256.14	BRD2	503.77	6.97508	1.19205e-134	1.40929e-132
ENSG00000065150.21	IPO5	425.533	6.66614	1.92609e-134	2.26864e-132
ENSG00000183337.18	BCOR	426.846	7.20136	4.63212e-134	5.43571e-132
ENSG00000148773.14	MKI67	518.998	7.7918	5.14304e-134	6.013e-132
ENSG00000113328.19	CCNG1	462.54	7.39097	6.51152e-134	7.58496e-132
ENSG00000163605.15	PPP4R2	479.326	7.71349	1.07937e-133	1.2527e-131
ENSG00000005483.22	KMT2E	418.281	7.43575	3.19644e-133	3.69621e-131
ENSG00000166197.17	NOLC1	419.732	7.43962	6.92618e-133	7.97997e-131
ENSG00000011304.22	PTBP1	456.435	6.47463	1.34367e-132	1.5425e-130
ENSG00000108091.11	CCDC6	442.768	7.82062	2.16608e-132	2.47762e-130
ENSG00000136485.16	DCAF7	332.374	6.87517	8.56397e-132	9.76046e-130
ENSG00000182670.14	TTC3	390.736	6.42669	8.95196e-132	1.01661e-129
ENSG00000101126.18	ADNP	513.989	7.8554	1.06294e-131	1.20279e-129
ENSG00000120685.20	PROSER1	382.755	7.26486	1.89124e-131	2.13245e-129
ENSG00000197111.16	PCBP2	369.458	6.53367	2.34779e-131	2.63785e-129
ENSG00000285976.2	ENSG00000285976	448.698	7.83994	3.05512e-131	3.42044e-129
ENSG00000288701.1	PRRC2B	389.499	6.60679	3.34031e-131	3.72656e-129
ENSG00000119402.18	FBXW2	367.563	7.32398	3.84639e-131	4.27611e-129
ENSG00000100852.14	ARHGAP5	436.43	7.57685	4.43898e-131	4.91765e-129
ENSG00000116754.14	SRSF11	398.715	6.88182	4.62001e-131	5.10037e-129
ENSG00000078369.18	GNB1	344.804	6.92644	5.12538e-131	5.63863e-129
ENSG00000143549.21	TPM3	388.7	6.03067	1.5904e-130	1.74361e-128
ENSG00000086598.11	TMED2	417.561	7.31179	1.66507e-130	1.81918e-128
ENSG00000009413.16	REV3L	411.583	7.02192	2.22525e-130	2.42284e-128
ENSG00000258017.3	ENSG00000258017	292.297	6.40711	2.58526e-130	2.80519e-128
ENSG00000204628.12	RACK1	446.438	5.26583	3.17899e-130	3.43765e-128
ENSG00000124207.17	CSE1L	413.366	7.25729	5.41791e-130	5.83881e-128
ENSG00000076108.12	BAZ2A	371.044	7.29587	8.95984e-130	9.62317e-128
ENSG00000116698.22	SMG7	341.314	6.72044	1.09911e-129	1.1765e-127
ENSG00000106723.17	SPIN1	501.109	8.00106	2.67071e-129	2.84912e-127
ENSG00000143614.10	GATAD2B	378.207	7.59318	3.0349e-129	3.22677e-127
ENSG00000114850.7	SSR3	327.18	6.88252	3.04608e-129	3.22782e-127
ENSG00000108021.21	TASOR2	484.815	7.45428	3.12736e-129	3.30291e-127
ENSG00000196914.9	ARHGEF12	392.448	7.01854	5.79813e-129	6.10325e-127
ENSG00000056097.16	ZFR	465.081	7.22287	9.08325e-129	9.5296e-127
ENSG00000119969.15	HELLS	377.887	6.98677	1.47409e-128	1.54142e-126
ENSG00000100580.8	TMED8	373.247	7.22561	2.10887e-128	2.19795e-126
ENSG00000154945.7	ANKRD40	332.673	6.98387	2.12805e-128	2.2098e-126
ENSG00000143970.18	ASXL2	394.074	7.46587	2.1342e-128	2.2098e-126
ENSG00000114857.19	NKTR	371.105	6.8685	2.17555e-128	2.24529e-126
ENSG00000137075.18	RNF38	395.107	7.42788	2.97131e-128	3.05659e-126
ENSG00000196715.7	VKORC1L1	360.116	7.47295	4.31611e-128	4.42562e-126
ENSG00000105323.18	HNRNPUL1	350.31	6.84954	6.55491e-128	6.68614e-126
ENSG00000169714.17	CNBP	398.128	7.10261	6.5629e-128	6.68614e-126
ENSG00000146463.12	ZMYM4	385.41	7.09365	6.7498e-128	6.85451e-126
ENSG00000167193.8	CRK	434.11	7.74888	9.01734e-128	9.12797e-126
ENSG00000196712.20	NF1	310.76	6.61724	9.20664e-128	9.28991e-126
ENSG00000137710.17	RDX	342.899	7.14736	1.07192e-127	1.07818e-125
ENSG00000141867.19	BRD4	307.487	6.48535	1.21925e-127	1.22249e-125
ENSG00000258441.1	LINC00641	338.605	6.93206	1.35371e-127	1.35302e-125
ENSG00000165119.21	HNRNPK	447.823	7.05497	1.64569e-127	1.63969e-125
ENSG00000163125.16	RPRD2	387.606	7.17329	1.72356e-127	1.71189e-125
ENSG00000180398.13	MCFD2	332.709	7.13956	3.0294e-127	2.99949e-125
ENSG00000011405.14	PIK3C2A	397.262	7.36143	4.74913e-127	4.68759e-125
ENSG00000213639.10	PPP1CB	398.997	7.21686	5.35197e-127	5.26621e-125
ENSG00000083520.15	DIS3	391.119	7.04347	7.36858e-127	7.22805e-125
ENSG00000197323.12	TRIM33	445.404	7.69336	8.5934e-127	8.40349e-125
ENSG00000144381.18	HSPD1	411.823	6.35582	1.22702e-126	1.19621e-124
ENSG00000149212.12	SESN3	558.564	8.68968	1.93752e-126	1.88308e-124
ENSG00000134644.16	PUM1	374.664	6.86011	2.10008e-126	2.03483e-124
ENSG00000228716.7	DHFR	381.573	7.34451	2.30483e-126	2.22641e-124
ENSG00000100335.15	MIEF1	367.302	7.32206	2.33769e-126	2.25129e-124
ENSG00000204138.13	PHACTR4	362.035	7.34561	2.38388e-126	2.28882e-124
ENSG00000131149.19	GSE1	331.171	7.04736	2.93377e-126	2.80827e-124
ENSG00000166747.13	AP1G1	364.65	7.04989	3.35466e-126	3.20148e-124
ENSG00000163349.22	HIPK1	380.921	7.36937	5.21167e-126	4.95876e-124
ENSG00000133112.17	TPT1	572.229	6.38335	6.07387e-126	5.76181e-124
ENSG00000114302.16	PRKAR2A	389.65	7.53913	6.205e-126	5.86863e-124
ENSG00000107581.13	EIF3A	495.693	6.07751	6.85007e-126	6.45945e-124
ENSG00000169504.15	CLIC4	437.126	7.5764	7.45315e-126	7.00729e-124
ENSG00000196323.14	ZBTB44	443.227	7.92966	9.05319e-126	8.48643e-124
ENSG00000124789.12	NUP153	505.865	7.87665	1.93745e-125	1.8108e-123
ENSG00000139697.14	SBNO1	352.415	7.26607	1.98798e-125	1.85256e-123
ENSG00000173276.14	ZBTB21	407.443	7.35466	2.05053e-125	1.90525e-123
ENSG00000205581.11	HMGN1	399.102	7.32211	2.39936e-125	2.22285e-123
ENSG00000147403.18	RPL10	397.892	6.00111	3.33993e-125	3.0852e-123
ENSG00000084652.16	TXLNA	364.614	7.11644	4.21064e-125	3.87819e-123
ENSG00000153560.12	UBP1	326.209	6.74904	4.23919e-125	3.89318e-123
ENSG00000120071.15	KANSL1	292.629	6.0359	4.80104e-125	4.39642e-123
ENSG00000188647.13	PTAR1	477.393	7.98036	5.1106e-125	4.66641e-123
ENSG00000108829.10	LRRC59	331.497	6.73579	5.19233e-125	4.7274e-123
ENSG00000185658.14	BRWD1	364.765	7.26732	5.34935e-125	4.85641e-123
ENSG00000146592.17	CREB5	396.235	7.08581	1.1862e-124	1.07381e-122
ENSG00000165650.12	PDZD8	466.779	7.85887	1.25806e-124	1.13562e-122
ENSG00000083168.11	KAT6A	416.877	7.59662	1.55845e-124	1.40278e-122
ENSG00000113810.16	SMC4	384.026	7.15834	2.18096e-124	1.95755e-122
ENSG00000125944.21	HNRNPR	328.476	7.11845	2.42855e-124	2.17363e-122
ENSG00000182158.16	CREB3L2	295.644	6.8486	3.02721e-124	2.70181e-122
ENSG00000177425.11	PAWR	396.226	7.61109	3.55663e-124	3.1654e-122
ENSG00000101871.17	MID1	317.838	7.11108	4.68807e-124	4.16069e-122
ENSG00000138336.9	TET1	379.877	7.45899	5.33711e-124	4.72349e-122
ENSG00000187514.17	PTMA	535.286	6.28591	8.07527e-124	7.12693e-122
ENSG00000253729.8	PRKDC	382.459	6.82614	1.77657e-123	1.56358e-121
ENSG00000106829.20	TLE4	308.303	6.3	1.8817e-123	1.65152e-121
ENSG00000157500.12	APPL1	380.285	7.60099	2.29586e-123	2.00945e-121
ENSG00000107929.16	LARP4B	363.394	6.94625	2.50388e-123	2.18548e-121
ENSG00000067992.17	PDK3	296.43	6.51889	3.86481e-123	3.36408e-121
ENSG00000164284.15	GRPEL2	479.966	8.09273	4.07495e-123	3.53728e-121
ENSG00000096063.16	SRPK1	351.294	6.94742	5.16119e-123	4.46795e-121
ENSG00000105939.14	ZC3HAV1	349.516	7.13186	5.54997e-123	4.79142e-121
ENSG00000270641.1	TSIX	312.037	5.9868	5.75651e-123	4.95623e-121
ENSG00000136108.15	CKAP2	438.721	7.58756	6.39395e-123	5.49013e-121
ENSG00000157764.14	BRAF	309.044	6.63605	7.991e-123	6.84289e-121
ENSG00000096384.20	HSP90AB1	377.517	5.66613	1.35802e-122	1.15977e-120
ENSG00000174437.18	ATP2A2	338.281	6.4347	1.45257e-122	1.23718e-120
ENSG00000170689.10	HOXB9	327.948	6.88364	1.55675e-122	1.32236e-120
ENSG00000162402.14	USP24	339.139	6.23206	1.62075e-122	1.37305e-120
ENSG00000115364.14	MRPL19	391.975	7.50772	1.67537e-122	1.41553e-120
ENSG00000139746.16	RBM26	441.542	6.82498	1.88246e-122	1.58627e-120
ENSG00000119285.11	HEATR1	382.292	6.94546	2.00951e-122	1.68884e-120
ENSG00000136238.19	RAC1	371.469	7.4254	2.1023e-122	1.76215e-120
ENSG00000122203.15	KIAA1191	359.332	7.37837	2.34365e-122	1.95927e-120
ENSG00000166181.13	API5	385.833	7.67712	2.42327e-122	2.0205e-120
ENSG00000115825.11	PRKD3	361.235	7.13985	2.5768e-122	2.14287e-120
ENSG00000146247.14	PHIP	453.743	7.75861	2.59384e-122	2.1514e-120
ENSG00000198160.15	MIER1	390.555	7.10234	2.72934e-122	2.25787e-120
ENSG00000167005.14	NUDT21	398.936	7.5314	3.28277e-122	2.70863e-120
ENSG00000170348.9	TMED10	366.095	7.45205	5.47677e-122	4.50717e-120
ENSG00000113712.19	CSNK1A1	343.445	7.14137	6.13316e-122	5.03428e-120
ENSG00000108946.16	PRKAR1A	307.815	6.73005	6.44496e-122	5.27654e-120
ENSG00000143322.21	ABL2	453.398	8.01944	6.63418e-122	5.41746e-120
ENSG00000152104.12	PTPN14	337.406	7.07871	7.69427e-122	6.26698e-120
ENSG00000164091.12	WDR82	437.091	7.80698	8.80872e-122	7.1563e-120
ENSG00000135018.14	UBQLN1	354.729	7.4964	9.02861e-122	7.31617e-120
ENSG00000198625.14	MDM4	342.804	7.26335	9.1697e-122	7.41155e-120
ENSG00000006125.18	AP2B1	294.949	6.7286	1.00096e-121	8.06981e-120
ENSG00000128585.18	MKLN1	368.341	7.41681	1.69769e-121	1.36522e-119
ENSG00000105983.23	LMBR1	361.277	7.21634	1.98364e-121	1.59113e-119
ENSG00000009954.11	BAZ1B	403.423	6.87057	2.17403e-121	1.73944e-119
ENSG00000198830.11	HMGN2	350.219	7.09749	2.54883e-121	2.03418e-119
ENSG00000103353.16	UBFD1	296.613	6.85333	5.02326e-121	3.99892e-119
ENSG00000158615.10	PPP1R15B	416.425	7.51308	5.14702e-121	4.08718e-119
ENSG00000085719.13	CPNE3	345.616	6.93449	8.36526e-121	6.62612e-119
ENSG00000100316.16	RPL3	319.151	5.23313	9.08703e-121	7.17989e-119
ENSG00000163635.20	ATXN7	300.726	6.76886	1.04857e-120	8.26444e-119
ENSG00000173889.16	PHC3	327.49	7.20064	1.54197e-120	1.2123e-118
ENSG00000009335.18	UBE3C	361.168	7.18002	1.55653e-120	1.22072e-118
ENSG00000132388.13	UBE2G1	323.167	7.09457	1.83555e-120	1.43599e-118
ENSG00000147548.17	NSD3	365.628	7.59878	2.3194e-120	1.81005e-118
ENSG00000165416.15	SUGT1	336.436	7.19243	3.02982e-120	2.35865e-118
ENSG00000143401.15	ANP32E	385.427	7.05291	4.18307e-120	3.24844e-118
ENSG00000143398.20	PIP5K1A	402.519	7.05407	4.39164e-120	3.40207e-118
ENSG00000198668.14	CALM1	348.921	7.16851	4.4387e-120	3.43014e-118
ENSG00000189241.8	TSPYL1	409.429	7.48559	4.56877e-120	3.52207e-118
ENSG00000182827.9	ACBD3	397.585	7.39578	4.93365e-120	3.79412e-118
ENSG00000169045.17	HNRNPH1	365.586	6.59861	6.99629e-120	5.36732e-118
ENSG00000120948.19	TARDBP	402.895	7.25642	8.30589e-120	6.35662e-118
ENSG00000106682.16	EIF4H	315.983	6.90238	1.15458e-119	8.81485e-118
ENSG00000122482.22	ZNF644	475.058	7.65147	1.27787e-119	9.73269e-118
ENSG00000164754.16	RAD21	367.73	7.24666	1.49112e-119	1.13297e-117
ENSG00000257103.9	LSM14A	323.964	7.05901	1.54235e-119	1.16909e-117
ENSG00000115677.18	HDLBP	303.997	5.83065	1.62308e-119	1.22734e-117
ENSG00000126261.13	UBA2	344.213	6.80082	1.80509e-119	1.36173e-117
ENSG00000172845.18	SP3	443.999	7.82792	3.9069e-119	2.94029e-117
ENSG00000163946.14	TASOR	352.409	6.92195	4.79454e-119	3.59977e-117
ENSG00000198740.9	ZNF652	353.217	7.49544	5.73986e-119	4.29934e-117
ENSG00000187772.8	LIN28B	390.465	7.54093	6.06092e-119	4.52911e-117
ENSG00000166025.18	AMOTL1	321.091	7.08742	7.25493e-119	5.40859e-117
ENSG00000114120.14	SLC25A36	365.802	7.40748	8.13735e-119	6.0522e-117
ENSG00000135837.16	CEP350	449.126	7.66197	1.06326e-118	7.88956e-117
ENSG00000284526.1	ENSG00000284526	298.134	7.01482	2.2287e-118	1.64986e-116
ENSG00000054523.20	KIF1B	285.111	6.65514	2.30764e-118	1.70432e-116
ENSG00000266412.6	NCOA4	396.694	7.56772	3.05701e-118	2.25252e-116
ENSG00000140350.15	ANP32A	308.034	6.37365	3.46211e-118	2.54509e-116
ENSG00000166881.10	NEMP1	347.217	7.62911	4.20117e-118	3.08124e-116
ENSG00000112081.17	SRSF3	357.009	6.98121	6.80386e-118	4.9786e-116
ENSG00000162607.13	USP1	472.761	7.7344	7.0965e-118	5.18077e-116
ENSG00000177485.7	ZBTB33	364.557	7.39481	1.07025e-117	7.79532e-116
ENSG00000084733.11	RAB10	311.725	7.08604	1.13207e-117	8.22671e-116
ENSG00000133703.14	KRAS	351.065	7.53748	1.13554e-117	8.23308e-116
ENSG00000114933.16	INO80D	355.034	7.31568	1.30133e-117	9.41357e-116
ENSG00000149547.15	EI24	329.076	7.54883	1.48178e-117	1.06945e-115
ENSG00000196865.4	NHLRC2	430.899	8.17936	1.54592e-117	1.1132e-115
ENSG00000112096.19	SOD2	286.899	6.40874	2.35202e-117	1.68983e-115
ENSG00000203668.3	CHML	366.724	7.24347	2.82599e-117	2.02576e-115
ENSG00000143376.14	SNX27	264.696	6.47734	3.05025e-117	2.18158e-115
ENSG00000144713.13	RPL32	307.484	5.43592	3.62495e-117	2.58677e-115
ENSG00000174197.18	MGA	302.617	6.53955	3.87507e-117	2.75905e-115
ENSG00000177733.7	HNRNPA0	347.676	7.37282	3.97287e-117	2.82234e-115
ENSG00000082153.18	BZW1	331.367	7.05447	4.60498e-117	3.26408e-115
ENSG00000052723.12	SIKE1	392.268	7.80693	5.83381e-117	4.12585e-115
ENSG00000134250.21	NOTCH2	337.402	6.89923	5.87863e-117	4.1483e-115
ENSG00000164163.11	ABCE1	398.269	7.39539	6.16352e-117	4.33966e-115
ENSG00000158161.16	EYA3	329.183	7.44493	6.25204e-117	4.39223e-115
ENSG00000118482.12	PHF3	362.016	7.07526	6.77763e-117	4.75094e-115
ENSG00000162599.17	NFIA	315.739	5.63589	8.49893e-117	5.94438e-115
ENSG00000181555.22	SETD2	406.082	7.25143	8.75625e-117	6.11086e-115
ENSG00000078747.16	ITCH	341.636	7.22012	1.14516e-116	7.97433e-115
ENSG00000168283.14	BMI1	367.71	7.41053	1.53583e-116	1.06713e-114
ENSG00000120802.14	TMPO	465.59	8.00388	1.54937e-116	1.07419e-114
ENSG00000143776.20	CDC42BPA	260.465	6.13277	1.71914e-116	1.18929e-114
ENSG00000117751.18	PPP1R8	324.309	7.27393	1.99114e-116	1.37445e-114
ENSG00000131711.15	MAP1B	310.251	7.12074	3.18457e-116	2.19348e-114
ENSG00000066044.15	ELAVL1	303.156	7.046	3.56381e-116	2.44937e-114
ENSG00000033800.14	PIAS1	312.39	7.31911	3.87064e-116	2.65449e-114
ENSG00000174231.17	PRPF8	273.169	6.23384	4.55816e-116	3.11924e-114
ENSG00000172380.6	GNG12	350.821	7.34156	5.15667e-116	3.5212e-114
ENSG00000244462.8	RBM12	347.167	7.62532	8.41048e-116	5.7307e-114
ENSG00000143612.21	C1orf43	314.109	7.27867	9.54992e-116	6.49312e-114
ENSG00000137309.20	HMGA1	268.177	6.562	1.22737e-115	8.32718e-114
ENSG00000106144.20	CASP2	319.843	7.04499	1.32162e-115	8.94745e-114
ENSG00000136536.15	MARCHF7	436.624	7.75938	1.38445e-115	9.35288e-114
ENSG00000090905.19	TNRC6A	323.039	7.09231	1.57486e-115	1.06166e-113
ENSG00000121774.18	KHDRBS1	320.605	6.89274	1.99258e-115	1.3404e-113
ENSG00000148943.12	LIN7C	400.907	7.83996	2.53853e-115	1.70404e-113
ENSG00000198492.16	YTHDF2	431.02	7.78628	3.50163e-115	2.34557e-113
ENSG00000063587.15	ZNF275	324.719	7.33063	6.75969e-115	4.51844e-113
ENSG00000123066.9	MED13L	336.411	6.85331	7.08079e-115	4.72311e-113
ENSG00000102024.19	PLS3	354.294	7.31771	8.77121e-115	5.83839e-113
ENSG00000162772.17	ATF3	370.06	6.81823	1.69295e-114	1.12452e-112
ENSG00000106261.17	ZKSCAN1	308.44	7.25532	2.66103e-114	1.76385e-112
ENSG00000109971.14	HSPA8	255.572	6.05418	2.7216e-114	1.80023e-112
ENSG00000099204.21	ABLIM1	261.927	6.82865	4.11819e-114	2.71676e-112
ENSG00000113013.16	HSPA9	331.981	6.71418	4.12436e-114	2.71676e-112
ENSG00000062650.20	WAPL	346.555	7.24366	4.31376e-114	2.83563e-112
ENSG00000131023.13	LATS1	380.984	7.76445	4.43701e-114	2.91061e-112
ENSG00000168264.11	IRF2BP2	341.769	7.06107	4.72965e-114	3.09616e-112
ENSG00000136938.9	ANP32B	246.849	5.39509	4.79781e-114	3.1343e-112
ENSG00000171681.13	ATF7IP	308.328	7.15592	5.99049e-114	3.8995e-112
ENSG00000164134.13	NAA15	338.17	7.29305	5.99374e-114	3.8995e-112
ENSG00000164164.17	OTUD4	354.02	7.31302	6.53315e-114	4.24173e-112
ENSG00000188846.14	RPL14	318.261	5.29671	8.80374e-114	5.70425e-112
ENSG00000141027.22	NCOR1	292.817	6.59417	1.10947e-113	7.17398e-112
ENSG00000114573.10	ATP6V1A	338.115	7.28665	1.15678e-113	7.46465e-112
ENSG00000180628.15	PCGF5	329.467	7.49678	1.24613e-113	8.02487e-112
ENSG00000068796.19	KIF2A	313.51	7.18313	1.41402e-113	9.0876e-112
ENSG00000100625.9	SIX4	337.98	7.48352	1.55782e-113	9.9915e-112
ENSG00000111640.15	GAPDH	333.314	5.48625	2.12239e-113	1.3585e-111
ENSG00000130024.15	PHF10	343.487	7.10595	2.2356e-113	1.42808e-111
ENSG00000198700.10	IPO9	303.972	6.85099	2.7445e-113	1.74963e-111
ENSG00000162433.15	AK4	307.489	7.29776	2.8174e-113	1.7925e-111
ENSG00000105968.19	H2AZ2	315.207	7.33167	4.48589e-113	2.84831e-111
ENSG00000158711.14	ELK4	326.08	7.0727	4.84606e-113	3.07085e-111
ENSG00000198791.12	CNOT7	295.219	6.88791	7.11172e-113	4.49756e-111
ENSG00000056277.16	ZNF280C	320.687	7.45686	9.08484e-113	5.73395e-111
ENSG00000116539.14	ASH1L	348.945	7.3014	1.00315e-112	6.31887e-111
ENSG00000074696.13	HACD3	340.9	7.55303	1.14015e-112	7.16756e-111
ENSG00000108061.13	SHOC2	301.527	7.08461	1.2747e-112	7.99753e-111
ENSG00000145425.10	RPS3A	262.394	6.11822	1.32646e-112	8.2982e-111
ENSG00000140948.13	ZCCHC14	339.53	7.43817	1.32786e-112	8.2982e-111
ENSG00000215114.10	UBXN2B	293.021	7.08513	1.36702e-112	8.52609e-111
ENSG00000136240.10	KDELR2	330.262	7.3472	1.39083e-112	8.65756e-111
ENSG00000099995.19	SF3A1	264.302	6.80104	1.86806e-112	1.16054e-110
ENSG00000168411.14	RFWD3	348.988	7.37943	1.92086e-112	1.19101e-110
ENSG00000132341.12	RAN	325.105	6.81083	1.98374e-112	1.22759e-110
ENSG00000127334.11	DYRK2	332.799	7.45587	2.48761e-112	1.5364e-110
ENSG00000097033.14	SH3GLB1	327.486	7.1534	2.62265e-112	1.61665e-110
ENSG00000109686.19	SH3D19	269.292	6.40738	2.75528e-112	1.69511e-110
ENSG00000147874.11	HAUS6	374.77	7.57906	3.23002e-112	1.98333e-110
ENSG00000174010.10	KLHL15	376.773	7.80655	4.18119e-112	2.56242e-110
ENSG00000166326.7	TRIM44	247.32	6.59044	4.61145e-112	2.82064e-110
ENSG00000153827.14	TRIP12	332.621	6.72205	5.93811e-112	3.62511e-110
ENSG00000101966.13	XIAP	297.293	7.06161	9.35363e-112	5.69924e-110
ENSG00000176619.13	LMNB2	273.901	6.77898	9.41682e-112	5.72673e-110
ENSG00000196531.14	NACA	308.402	6.03679	1.07592e-111	6.53052e-110
ENSG00000102780.17	DGKH	276.734	6.87161	1.42489e-111	8.63215e-110
ENSG00000184900.16	SUMO3	267.601	6.86863	1.60886e-111	9.72809e-110
ENSG00000077147.16	TM9SF3	393.037	7.55342	1.7989e-111	1.08564e-109
ENSG00000168066.21	SF1	291.005	6.68321	2.11545e-111	1.27425e-109
ENSG00000115760.15	BIRC6	324.854	6.95896	3.00618e-111	1.80736e-109
ENSG00000132002.9	DNAJB1	271.168	6.58109	4.11812e-111	2.47118e-109
ENSG00000182481.10	KPNA2	332.625	7.26487	4.92224e-111	2.94813e-109
ENSG00000128595.17	CALU	320.584	7.31283	7.22124e-111	4.31694e-109
ENSG00000101109.12	STK4	280.359	7.16194	7.70504e-111	4.59748e-109
ENSG00000036549.13	ZZZ3	341.449	7.4506	2.15859e-110	1.28558e-108
ENSG00000008294.22	SPAG9	269.969	6.4066	2.36804e-110	1.40767e-108
ENSG00000145734.20	BDP1	345.101	7.11537	2.62837e-110	1.5595e-108
ENSG00000109133.13	TMEM33	392.421	8.04303	2.70353e-110	1.6011e-108
ENSG00000080802.20	CNOT4	280.721	7.01943	3.23542e-110	1.91252e-108
ENSG00000185787.15	MORF4L1	296.277	6.93016	4.95511e-110	2.92361e-108
ENSG00000155561.15	NUP205	319.103	6.74948	5.45319e-110	3.2115e-108
ENSG00000136603.14	SKIL	363.335	7.4356	7.51046e-110	4.41487e-108
ENSG00000254772.10	EEF1G	249.817	5.38836	9.52464e-110	5.58849e-108
ENSG00000113649.13	TCERG1	273.579	6.70367	1.27191e-109	7.44902e-108
ENSG00000133657.17	ATP13A3	374.883	7.53548	1.32696e-109	7.75709e-108
ENSG00000089006.17	SNX5	296.104	6.18649	1.4872e-109	8.6778e-108
ENSG00000092201.10	SUPT16H	337.053	6.66816	1.91906e-109	1.11771e-107
ENSG00000184226.15	PCDH9	297.611	5.93978	2.01015e-109	1.16861e-107
ENSG00000142541.18	RPL13A	321.513	5.25391	2.47221e-109	1.43461e-107
ENSG00000257923.12	CUX1	260.023	6.05759	2.74844e-109	1.59199e-107
ENSG00000167460.17	TPM4	254.268	6.45557	2.88873e-109	1.67019e-107
ENSG00000125249.7	RAP2A	328.731	7.34581	4.43275e-109	2.55824e-107
ENSG00000167635.12	ZNF146	375.645	7.6396	6.79816e-109	3.91624e-107
ENSG00000136527.19	TRA2B	310.493	6.47656	7.86831e-109	4.52449e-107
ENSG00000129128.13	SPCS3	334.616	7.5749	8.65963e-109	4.9705e-107
ENSG00000143442.22	POGZ	334.924	7.23917	1.05045e-108	6.01855e-107
ENSG00000124164.16	VAPB	290.143	7.26302	1.21422e-108	6.94431e-107
ENSG00000108654.16	DDX5	245.576	6.61544	1.51856e-108	8.66921e-107
ENSG00000164244.21	PRRC1	320.085	7.56352	1.60271e-108	9.13315e-107
ENSG00000135870.12	RC3H1	310.769	7.13667	1.65474e-108	9.41272e-107
ENSG00000051825.15	MPHOSPH9	287.509	7.01192	2.64458e-108	1.50163e-106
ENSG00000186432.10	KPNA4	273.379	6.70134	2.89751e-108	1.6423e-106
ENSG00000255508.7	ENSG00000255508	252.194	5.32116	3.14691e-108	1.78048e-106
ENSG00000100731.16	PCNX1	269.742	6.71585	3.3267e-108	1.87884e-106
ENSG00000104408.11	EIF3E	314.225	6.10876	3.43153e-108	1.9346e-106
ENSG00000185728.17	YTHDF3	362.374	7.75491	3.58173e-108	2.01569e-106
ENSG00000055332.19	EIF2AK2	339.278	7.77252	4.1677e-108	2.3413e-106
ENSG00000145592.14	RPL37	291.897	5.67303	4.50656e-108	2.52718e-106
ENSG00000179010.16	MRFAP1	276.209	6.7141	5.23647e-108	2.93132e-106
ENSG00000120694.20	HSPH1	298.692	5.91034	5.95351e-108	3.32683e-106
ENSG00000136504.13	KAT7	294.949	7.23346	6.07604e-108	3.38932e-106
ENSG00000162409.12	PRKAA2	359.742	7.79496	6.74459e-108	3.75564e-106
ENSG00000152291.15	TGOLN2	338.818	7.60505	1.33453e-107	7.41814e-106
ENSG00000166974.13	MAPRE2	223.653	6.37418	1.33754e-107	7.42183e-106
ENSG00000130396.21	AFDN	270.214	6.54201	1.41974e-107	7.86416e-106
ENSG00000078140.14	UBE2K	389.88	8.17591	1.44025e-107	7.96388e-106
ENSG00000035403.18	VCL	228.104	6.3682	1.58412e-107	8.74411e-106
ENSG00000147604.14	RPL7	264.795	5.75521	1.59234e-107	8.77423e-106
ENSG00000110075.15	PPP6R3	312.161	7.12997	2.15266e-107	1.18411e-105
ENSG00000102081.16	FMR1	305.606	6.9336	2.24697e-107	1.23385e-105
ENSG00000184575.12	XPOT	284.183	7.04071	2.36568e-107	1.29678e-105
ENSG00000112419.15	PHACTR2	266.25	7.1354	2.52044e-107	1.37923e-105
ENSG00000153317.15	ASAP1	267.942	6.8238	2.73925e-107	1.49639e-105
ENSG00000111412.6	SPRING1	251.342	6.81649	3.09896e-107	1.68997e-105
ENSG00000005339.15	CREBBP	298.338	6.46327	3.33156e-107	1.8137e-105
ENSG00000115977.21	AAK1	246.79	6.66571	3.44258e-107	1.87092e-105
ENSG00000134294.14	SLC38A2	455.465	8.47356	3.52093e-107	1.91022e-105
ENSG00000116560.12	SFPQ	306.387	6.03855	3.54967e-107	1.92252e-105
ENSG00000188612.12	SUMO2	294.375	7.09081	3.74077e-107	2.02257e-105
ENSG00000163848.20	ZNF148	325.071	7.58935	3.9635e-107	2.13934e-105
ENSG00000162613.17	FUBP1	310.186	7.31405	5.14802e-107	2.77398e-105
ENSG00000101367.9	MAPRE1	359.618	8.05742	6.07069e-107	3.2656e-105
ENSG00000185009.13	AP3M1	300.03	7.16401	6.57759e-107	3.53228e-105
ENSG00000138071.15	ACTR2	362.243	7.85986	6.95465e-107	3.72844e-105
ENSG00000149532.16	CPSF7	263.263	6.72051	7.77651e-107	4.16201e-105
ENSG00000118200.15	CAMSAP2	292.461	7.27542	7.93291e-107	4.23855e-105
ENSG00000117500.13	TMED5	331.762	7.45332	8.24713e-107	4.39902e-105
ENSG00000061676.15	NCKAP1	288.563	6.78184	8.51575e-107	4.53467e-105
ENSG00000142676.14	RPL11	256.256	5.66977	1.11831e-106	5.94506e-105
ENSG00000091656.19	ZFHX4	269.113	7.14929	1.18096e-106	6.26761e-105
ENSG00000142937.12	RPS8	244.398	5.35014	1.23301e-106	6.5329e-105
ENSG00000118689.15	FOXO3	459.38	8.64604	1.27139e-106	6.72498e-105
ENSG00000165934.13	CPSF2	271.856	7.11679	1.5669e-106	8.27428e-105
ENSG00000140988.16	RPS2	508.865	4.48254	1.85061e-106	9.7562e-105
ENSG00000140443.15	IGF1R	250.236	6.64992	2.12344e-106	1.11759e-104
ENSG00000005812.11	FBXL3	306.197	7.06595	2.58486e-106	1.35819e-104
ENSG00000155096.15	AZIN1	288.809	6.84764	3.94512e-106	2.06949e-104
ENSG00000169057.24	MECP2	229.105	6.2002	4.84359e-106	2.5366e-104
ENSG00000149948.14	HMGA2	236.644	6.81363	5.41934e-106	2.83344e-104
ENSG00000111300.10	NAA25	285.576	6.96657	6.04516e-106	3.15544e-104
ENSG00000125686.12	MED1	360.297	7.92738	6.09961e-106	3.17862e-104
ENSG00000164916.11	FOXK1	285.508	7.04448	6.35465e-106	3.30609e-104
ENSG00000121892.15	PDS5A	242.678	6.72473	6.70736e-106	3.48387e-104
ENSG00000205060.11	SLC35B4	309.626	7.52428	7.07651e-106	3.66959e-104
ENSG00000146676.10	PURB	290.21	7.26486	7.34506e-106	3.80263e-104
ENSG00000048991.17	R3HDM1	279.757	7.3692	7.5002e-106	3.87661e-104
ENSG00000120742.11	SERP1	283.117	6.95106	7.72429e-106	3.98593e-104
ENSG00000156052.11	GNAQ	313.579	7.53664	9.91076e-106	5.10589e-104
ENSG00000124193.16	SRSF6	289.19	7.07169	1.18321e-105	6.08583e-104
ENSG00000181827.16	RFX7	315.062	7.60614	2.5376e-105	1.3031e-103
ENSG00000198815.9	FOXJ3	310.274	7.52417	2.65148e-105	1.35938e-103
ENSG00000110917.8	MLEC	281.602	7.12406	2.90352e-105	1.48619e-103
ENSG00000152601.18	MBNL1	375.161	8.04708	2.9496e-105	1.50734e-103
ENSG00000111530.13	CAND1	332.467	7.36296	3.23768e-105	1.6519e-103
ENSG00000138767.14	CNOT6L	311.989	7.42162	4.39824e-105	2.24042e-103
ENSG00000185129.8	PURA	312.525	7.17982	4.70359e-105	2.39211e-103
ENSG00000166847.10	DCTN5	297.913	7.52026	4.93292e-105	2.50472e-103
ENSG00000065559.15	MAP2K4	277.704	7.05816	5.01131e-105	2.54045e-103
ENSG00000134717.18	BTF3L4	268.728	7.15379	6.39553e-105	3.237e-103
ENSG00000164684.13	ZNF704	233.594	6.58304	7.56586e-105	3.82323e-103
ENSG00000117713.21	ARID1A	249.561	6.68805	8.01819e-105	4.04536e-103
ENSG00000280987.4	MATR3	291.439	6.94914	1.09602e-104	5.52088e-103
ENSG00000163811.12	WDR43	338.988	6.34408	1.11095e-104	5.58718e-103
ENSG00000173575.22	CHD2	272.902	6.12104	1.23317e-104	6.19203e-103
ENSG00000131051.24	RBM39	333.437	6.88074	1.42762e-104	7.15708e-103
ENSG00000119042.17	SATB2	278.207	7.19898	1.64835e-104	8.25059e-103
ENSG00000153201.16	RANBP2	337.166	6.96605	1.72546e-104	8.62294e-103
ENSG00000174574.16	AKIRIN1	340.976	7.71703	2.02236e-104	1.00908e-102
ENSG00000115808.12	STRN	269.452	6.71774	2.08814e-104	1.04026e-102
ENSG00000186260.17	MRTFB	288.767	7.20346	2.53224e-104	1.25952e-102
ENSG00000152558.15	TMEM123	313.467	7.47936	2.70077e-104	1.34124e-102
ENSG00000138326.21	RPS24	253.526	5.60389	2.71235e-104	1.34488e-102
ENSG00000081154.12	PCNP	317.288	6.92058	2.88396e-104	1.42774e-102
ENSG00000213923.13	CSNK1E	291.316	6.90298	3.01171e-104	1.48866e-102
ENSG00000130338.13	TULP4	256.075	6.84881	4.10408e-104	2.02545e-102
ENSG00000147649.10	MTDH	344.396	7.46697	4.4843e-104	2.20965e-102
ENSG00000175387.16	SMAD2	267.624	6.66735	5.44704e-104	2.67988e-102
ENSG00000046604.14	DSG2	309.487	7.40651	7.04732e-104	3.46182e-102
ENSG00000172493.23	AFF1	256.471	7.24222	7.65327e-104	3.75365e-102
ENSG00000247556.6	OIP5-AS1	354.184	8.03666	1.49391e-103	7.31579e-102
ENSG00000143321.19	HDGF	227.496	6.22626	1.52298e-103	7.4466e-102
ENSG00000169446.6	MMGT1	356.589	7.98461	1.59256e-103	7.77482e-102
ENSG00000015479.20	MATR3	284.989	6.91701	1.70269e-103	8.29969e-102
ENSG00000112242.16	E2F3	314.456	7.22927	2.47282e-103	1.20351e-101
ENSG00000213079.10	SCAF8	292.415	7.38346	3.7574e-103	1.82591e-101
ENSG00000261609.8	GAN	287.084	7.35342	4.02613e-103	1.95351e-101
ENSG00000065060.18	UHRF1BP1	231.186	6.78761	4.37022e-103	2.11722e-101
ENSG00000146263.12	MMS22L	312.413	7.37106	5.48502e-103	2.65323e-101
ENSG00000074695.6	LMAN1	309.725	7.58264	5.49336e-103	2.65323e-101
ENSG00000008988.11	RPS20	198.199	5.84512	6.07349e-103	2.92896e-101
ENSG00000074356.17	NCBP3	239.644	6.62671	7.2095e-103	3.47152e-101
ENSG00000163682.17	RPL9	242.301	5.93145	7.77166e-103	3.73653e-101
ENSG00000171634.19	BPTF	304.668	6.56506	8.50454e-103	4.08269e-101
ENSG00000022267.19	FHL1	213.585	6.72087	8.535e-103	4.09112e-101
ENSG00000128272.18	ATF4	240.646	6.62479	9.26213e-103	4.43295e-101
ENSG00000135535.17	CD164	285.612	7.24023	1.28287e-102	6.13067e-101
ENSG00000166503.9	HDGFL3	283.748	7.13309	1.59023e-102	7.58807e-101
ENSG00000170759.11	KIF5B	347.745	6.90643	1.67149e-102	7.96385e-101
ENSG00000165527.8	ARF6	306.687	7.56753	1.81642e-102	8.64135e-101
ENSG00000100393.14	EP300	280.664	7.37557	1.90905e-102	9.0684e-101
ENSG00000054118.15	THRAP3	225.815	6.45381	1.91909e-102	9.10245e-101
ENSG00000134748.13	PRPF38A	268.465	6.96234	2.08798e-102	9.8887e-101
ENSG00000143815.15	LBR	303.746	7.08263	2.20279e-102	1.04169e-100
ENSG00000163655.16	GMPS	272.679	6.93836	2.28327e-102	1.07814e-100
ENSG00000132953.18	XPO4	290.911	7.61434	2.69339e-102	1.2699e-100
ENSG00000087053.20	MTMR2	251.86	6.95291	3.04725e-102	1.43461e-100
ENSG00000100941.9	PNN	280.576	5.97943	3.75622e-102	1.76576e-100
ENSG00000166889.14	PATL1	222.487	6.87612	3.79323e-102	1.78052e-100
ENSG00000018510.18	AGPS	302.007	6.89349	3.95883e-102	1.8555e-100
ENSG00000105879.12	CBLL1	293.925	7.50976	3.97769e-102	1.86158e-100
ENSG00000158195.11	WASF2	273.68	6.8876	5.29278e-102	2.4734e-100
ENSG00000133030.22	MPRIP	203.412	5.90975	5.50853e-102	2.57043e-100
ENSG00000145604.17	SKP2	242.32	6.76307	6.56695e-102	3.05981e-100
ENSG00000196313.13	POM121	246.233	6.8319	6.69208e-102	3.11354e-100
ENSG00000184863.11	RBM33	275.948	6.86305	8.14682e-102	3.78481e-100
ENSG00000164080.14	RAD54L2	230.447	6.21284	8.8047e-102	4.08445e-100
ENSG00000134769.23	DTNA	219.797	5.91523	9.25703e-102	4.28801e-100
ENSG00000070770.10	CSNK2A2	275.363	7.08126	9.53755e-102	4.4115e-100
ENSG00000152795.18	HNRNPDL	296.923	7.46007	1.01897e-101	4.70628e-100
ENSG00000187605.16	TET3	237.612	6.57197	1.48742e-101	6.85989e-100
ENSG00000129317.15	PUS7L	256.973	7.1366	1.70785e-101	7.86506e-100
ENSG00000154001.14	PPP2R5E	249.001	6.72095	1.91187e-101	8.79181e-100
ENSG00000213585.11	VDAC1	276.953	6.8344	2.07402e-101	9.52367e-100
ENSG00000136193.17	SCRN1	301.212	7.60596	2.1264e-101	9.75005e-100
ENSG00000196262.15	PPIA	194.039	5.70563	2.23011e-101	1.02108e-99
ENSG00000143751.10	SDE2	290.894	7.07231	2.38248e-101	1.08927e-99
ENSG00000168906.13	MAT2A	297.821	7.52858	2.40889e-101	1.09976e-99
ENSG00000008952.17	SEC62	270.641	6.89255	3.5025e-101	1.59674e-99
ENSG00000257093.7	DENND11	277.083	7.48074	3.5679e-101	1.62421e-99
ENSG00000160014.17	CALM3	224.435	6.34037	4.2626e-101	1.93768e-99
ENSG00000029725.17	RABEP1	285.677	6.96264	4.99112e-101	2.26559e-99
ENSG00000109929.10	SC5D	266.402	7.191	5.37125e-101	2.43466e-99
ENSG00000112200.17	ZNF451	306.065	7.34267	7.0398e-101	3.18641e-99
ENSG00000275004.4	ZNF280B	317.54	7.74553	7.64233e-101	3.4542e-99
ENSG00000086712.13	TXLNG	363.253	8.2243	9.83075e-101	4.437e-99
ENSG00000112308.13	C6orf62	326.177	7.84253	1.08094e-100	4.87176e-99
ENSG00000266086.3	ENSG00000266086	302.15	7.37725	1.11846e-100	5.03369e-99
ENSG00000138018.19	SELENOI	284.459	7.51747	1.24757e-100	5.60682e-99
ENSG00000080603.17	SRCAP	205.171	6.10316	1.25779e-100	5.64472e-99
ENSG00000141568.21	FOXK2	265.297	6.85094	1.33125e-100	5.96594e-99
ENSG00000253719.4	ATXN7L3B	327.915	7.8547	1.92386e-100	8.60957e-99
ENSG00000111266.9	DUSP16	330.41	7.73579	2.09186e-100	9.34815e-99
ENSG00000125691.14	RPL23	179.839	5.81859	2.46781e-100	1.10127e-98
ENSG00000105993.15	DNAJB6	260.333	6.4547	3.08432e-100	1.37445e-98
ENSG00000186468.13	RPS23	205.19	5.76081	3.94119e-100	1.75383e-98
ENSG00000122566.22	HNRNPA2B1	317.801	5.85413	4.09341e-100	1.81901e-98
ENSG00000197958.13	RPL12	262.043	4.96814	4.14695e-100	1.84022e-98
ENSG00000171316.13	CHD7	221.209	6.32094	4.22652e-100	1.87291e-98
ENSG00000146457.16	WTAP	290.951	7.07804	4.35818e-100	1.92855e-98
ENSG00000198162.12	MAN1A2	290.061	6.90621	5.72835e-100	2.53134e-98
ENSG00000117697.15	NSL1	212.235	6.48718	6.42742e-100	2.8363e-98
ENSG00000164683.18	HEY1	326.678	7.65175	6.67433e-100	2.94116e-98
ENSG00000197045.13	GMFB	334.669	7.69771	7.34892e-100	3.23394e-98
ENSG00000277443.3	MARCKS	265.554	7.18827	8.64582e-100	3.79936e-98
ENSG00000023516.9	AKAP11	325.649	7.77857	8.98937e-100	3.94486e-98
ENSG00000134352.20	IL6ST	283.832	7.23196	1.13176e-99	4.95969e-98
ENSG00000048828.17	FAM120A	280.559	7.10869	1.18074e-99	5.16722e-98
ENSG00000111540.16	RAB5B	207.068	6.82394	1.37454e-99	6.00701e-98
ENSG00000141429.14	GALNT1	229.137	6.77066	1.64801e-99	7.19223e-98
ENSG00000132912.13	DCTN4	292.985	7.06974	1.66834e-99	7.27091e-98
ENSG00000120253.14	NUP43	299.285	7.21509	2.22254e-99	9.67291e-98
ENSG00000110422.12	HIPK3	269.086	7.31733	2.37336e-99	1.03151e-97
ENSG00000029364.12	SLC39A9	282.526	7.70891	2.77279e-99	1.20347e-97
ENSG00000171862.12	PTEN	241.049	6.84646	2.85338e-99	1.23675e-97
ENSG00000153006.16	SREK1IP1	285.456	7.5242	3.80241e-99	1.64584e-97
ENSG00000103194.16	USP10	303.006	7.37794	4.25917e-99	1.84103e-97
ENSG00000196504.20	PRPF40A	285.58	7.19359	4.85398e-99	2.09528e-97
ENSG00000197622.13	CDC42SE1	263.991	7.28923	5.18684e-99	2.23592e-97
ENSG00000212719.14	LINC02693	202.882	6.05578	5.21592e-99	2.2454e-97
ENSG00000132485.14	ZRANB2	292.869	7.55825	5.56364e-99	2.39184e-97
ENSG00000084093.19	REST	247.844	6.98257	6.12244e-99	2.6285e-97
ENSG00000139146.14	SINHCAF	286.609	7.1906	8.32674e-99	3.57002e-97
ENSG00000198018.7	ENTPD7	235.591	6.72945	9.3578e-99	4.00666e-97
ENSG00000124214.21	STAU1	275.126	7.2375	1.3395e-98	5.72747e-97
ENSG00000106571.15	GLI3	222.288	6.9306	1.45061e-98	6.19423e-97
ENSG00000068305.18	MEF2A	258.282	6.90341	1.61139e-98	6.8715e-97
ENSG00000197965.12	MPZL1	242.204	7.10958	1.70763e-98	7.27212e-97
ENSG00000163781.14	TOPBP1	293.219	7.13419	1.7688e-98	7.5225e-97
ENSG00000137414.7	FAM8A1	266.753	7.24495	1.99838e-98	8.48748e-97
ENSG00000244687.13	UBE2V1	206.292	6.67091	3.25514e-98	1.38067e-96
ENSG00000110713.17	NUP98	224.166	6.45869	3.33252e-98	1.4116e-96
ENSG00000167491.18	GATAD2A	248.734	6.76231	3.5017e-98	1.48128e-96
ENSG00000114999.8	TTL	214.525	6.68146	3.71146e-98	1.56792e-96
ENSG00000143702.16	CEP170	257.037	6.98552	4.35031e-98	1.83536e-96
ENSG00000170515.14	PA2G4	245.875	6.92047	4.57168e-98	1.92618e-96
ENSG00000180008.9	SOCS4	349.72	8.01386	4.57844e-98	1.92647e-96
ENSG00000134779.15	TPGS2	236.295	6.49126	5.24043e-98	2.20209e-96
ENSG00000116127.20	ALMS1	203.164	6.34014	6.38491e-98	2.67946e-96
ENSG00000184787.19	UBE2G2	261.787	7.01532	8.51384e-98	3.56815e-96
ENSG00000168172.9	HOOK3	244.769	6.82514	9.205e-98	3.85272e-96
ENSG00000133065.11	SLC41A1	196.537	6.70132	1.04881e-97	4.38399e-96
ENSG00000074800.16	ENO1	197.223	5.26242	1.06963e-97	4.46511e-96
ENSG00000023287.13	RB1CC1	280.797	7.38124	1.08489e-97	4.52287e-96
ENSG00000179833.4	SERTAD2	227.719	6.96263	1.16736e-97	4.86025e-96
ENSG00000109184.15	DCUN1D4	276.068	7.18905	1.17047e-97	4.86681e-96
ENSG00000086232.13	EIF2AK1	243.031	6.53388	1.34662e-97	5.59192e-96
ENSG00000075785.14	RAB7A	215.483	6.59585	1.59786e-97	6.6265e-96
ENSG00000174780.17	SRP72	283.104	7.17919	1.98133e-97	8.20609e-96
ENSG00000100129.18	EIF3L	250.396	6.49448	2.22708e-97	9.21183e-96
ENSG00000171490.13	RSL1D1	239.106	6.36844	2.81127e-97	1.16131e-95
ENSG00000139163.16	ETNK1	259.106	6.99719	2.83676e-97	1.17031e-95
ENSG00000133026.14	MYH10	243.67	6.41534	3.21474e-97	1.32452e-95
ENSG00000120709.11	FAM53C	252.581	6.7782	3.70349e-97	1.52391e-95
ENSG00000177200.18	CHD9	294.182	7.44813	3.72869e-97	1.53229e-95
ENSG00000154429.11	CCSAP	306.222	7.56642	4.0556e-97	1.66448e-95
ENSG00000120438.12	TCP1	213.341	6.58184	4.59246e-97	1.88238e-95
ENSG00000149273.15	RPS3	179.004	4.84648	4.74742e-97	1.94338e-95
ENSG00000122484.9	RPAP2	190.845	6.46148	4.88533e-97	1.99725e-95
ENSG00000153339.15	TRAPPC8	230.107	6.45178	5.00434e-97	2.04327e-95
ENSG00000122126.18	OCRL	196.712	5.95859	5.95642e-97	2.42887e-95
ENSG00000151835.17	SACS	250.882	6.859	7.06943e-97	2.87902e-95
ENSG00000168813.17	ZNF507	296.612	7.35399	9.91052e-97	4.03087e-95
ENSG00000075415.15	SLC25A3	195.746	6.4962	1.08594e-96	4.41113e-95
ENSG00000108064.11	TFAM	297.905	7.65142	1.35551e-96	5.49911e-95
ENSG00000197771.13	MCMBP	256.273	6.84461	1.77045e-96	7.17325e-95
ENSG00000106344.8	RBM28	192.423	5.92135	1.89433e-96	7.66338e-95
ENSG00000139800.9	ZIC5	283.668	7.45502	1.89625e-96	7.66338e-95
ENSG00000165410.15	CFL2	270.02	7.25759	1.98259e-96	8.00209e-95
ENSG00000166716.10	ZNF592	226.617	6.90222	2.88592e-96	1.16333e-94
ENSG00000014824.14	SLC30A9	236.388	6.67985	3.05956e-96	1.23176e-94
ENSG00000152409.9	JMY	278.802	7.5551	3.10617e-96	1.24893e-94
ENSG00000144354.15	CDCA7	242.576	6.95234	3.68847e-96	1.48118e-94
ENSG00000197024.9	ZNF398	275.502	7.47533	4.56177e-96	1.82956e-94
ENSG00000198176.13	TFDP1	248.429	7.09109	6.36454e-96	2.54936e-94
ENSG00000115904.15	SOS1	243.433	6.68761	7.10698e-96	2.84315e-94
ENSG00000168036.18	CTNNB1	244.228	5.9881	9.32788e-96	3.72692e-94
ENSG00000135069.14	PSAT1	241.815	6.90057	9.95369e-96	3.97195e-94
ENSG00000138095.20	LRPPRC	220.67	5.92004	1.13699e-95	4.53138e-94
ENSG00000134108.14	ARL8B	281.383	7.27485	1.20802e-95	4.80842e-94
ENSG00000083857.15	FAT1	219.993	6.2161	1.31546e-95	5.22949e-94
ENSG00000197601.13	FAR1	263.89	7.34579	1.61311e-95	6.40472e-94
ENSG00000221914.11	PPP2R2A	277.086	6.9272	1.89786e-95	7.52586e-94
ENSG00000070367.16	EXOC5	306.383	7.50911	3.13046e-95	1.23982e-93
ENSG00000099954.19	CECR2	211.927	6.15504	3.38738e-95	1.3399e-93
ENSG00000114861.24	FOXP1	219.671	5.91936	4.64353e-95	1.83448e-93
ENSG00000143079.15	CTTNBP2NL	268.649	7.49677	5.00553e-95	1.97503e-93
ENSG00000142534.7	RPS11	189.979	5.36888	5.14115e-95	2.02602e-93
ENSG00000123562.18	MORF4L2	244.301	6.73092	5.92707e-95	2.33283e-93
ENSG00000160049.12	DFFA	249.691	7.46242	8.28524e-95	3.25694e-93
ENSG00000167258.15	CDK12	220.224	6.91434	8.90289e-95	3.49541e-93
ENSG00000104517.13	UBR5	252.99	6.9252	9.27586e-95	3.63733e-93
ENSG00000134982.17	APC	251.325	7.27696	1.03119e-94	4.03861e-93
ENSG00000153922.11	CHD1	258.257	6.90596	1.08204e-94	4.23251e-93
ENSG00000204217.16	BMPR2	268.915	7.63918	1.29997e-94	5.07871e-93
ENSG00000115464.15	USP34	276.415	7.19283	1.33437e-94	5.20666e-93
ENSG00000024526.17	DEPDC1	333.052	7.8843	1.44188e-94	5.61925e-93
ENSG00000197170.10	PSMD12	216.042	6.40024	1.60408e-94	6.24369e-93
ENSG00000026025.16	VIM	223.647	6.56859	1.76218e-94	6.85065e-93
ENSG00000065613.15	SLK	227.974	6.86322	1.94712e-94	7.56036e-93
ENSG00000067955.15	CBFB	238.918	7.08881	2.69465e-94	1.04501e-92
ENSG00000009844.16	VTA1	263.825	6.992	2.70249e-94	1.04677e-92
ENSG00000127481.15	UBR4	208.28	5.86726	3.13804e-94	1.21399e-92
ENSG00000125834.13	STK35	214.147	6.8172	3.41084e-94	1.31792e-92
ENSG00000205269.6	TMEM170B	263.028	7.28785	3.56139e-94	1.37441e-92
ENSG00000185278.16	ZBTB37	210.543	6.56211	3.74739e-94	1.44443e-92
ENSG00000092853.14	CLSPN	215.739	6.18498	3.88109e-94	1.49415e-92
ENSG00000095574.12	IKZF5	243.542	6.95402	4.20333e-94	1.61624e-92
ENSG00000107443.16	CCNJ	260.606	7.22013	4.96423e-94	1.90651e-92
ENSG00000183283.16	DAZAP2	227.671	7.1329	5.84097e-94	2.2405e-92
ENSG00000115524.17	SF3B1	229.694	6.44868	5.85316e-94	2.24246e-92
ENSG00000079246.16	XRCC5	212.35	6.22682	6.38243e-94	2.44228e-92
ENSG00000063978.16	RNF4	213.557	6.7676	6.55491e-94	2.50526e-92
ENSG00000103540.17	CCP110	270.205	7.32627	6.92907e-94	2.64507e-92
ENSG00000074054.20	CLASP1	216.446	6.56286	8.53187e-94	3.25299e-92
ENSG00000196236.13	XPNPEP3	195.511	6.45482	9.99123e-94	3.80483e-92
ENSG00000163939.18	PBRM1	238.01	6.78469	1.54347e-93	5.87076e-92
ENSG00000164190.19	NIPBL	234.427	6.4816	1.56174e-93	5.93311e-92
ENSG00000172115.9	CYCS	300.499	6.95488	1.83802e-93	6.97433e-92
ENSG00000122565.19	CBX3	287.564	7.25089	1.89478e-93	7.18114e-92
ENSG00000143674.11	MAP3K21	252.459	7.28156	1.99696e-93	7.55933e-92
ENSG00000079332.15	SAR1A	259.275	7.44982	3.96212e-93	1.49804e-91
ENSG00000101166.16	PRELID3B	282.544	7.5775	4.02333e-93	1.51937e-91
ENSG00000111142.14	METAP2	229.337	6.92674	4.16986e-93	1.57283e-91
ENSG00000099810.21	MTAP	268.846	7.37281	4.22018e-93	1.58992e-91
ENSG00000011114.15	BTBD7	264.892	7.35403	5.6592e-93	2.12953e-91
ENSG00000183741.12	CBX6	200.78	6.72611	5.96893e-93	2.24341e-91
ENSG00000162377.6	COA7	253.665	7.1717	5.98423e-93	2.2465e-91
ENSG00000102225.17	CDK16	168.766	6.07623	8.29397e-93	3.10989e-91
ENSG00000153944.12	MSI2	200.896	5.92525	8.58274e-93	3.21437e-91
ENSG00000085224.23	ATRX	234.945	6.27762	1.16314e-92	4.35099e-91
ENSG00000119414.12	PPP6C	268.972	7.50622	1.16806e-92	4.36424e-91
ENSG00000163468.15	CCT3	198.469	5.87583	1.23414e-92	4.60571e-91
ENSG00000110880.11	CORO1C	219.997	7.08424	1.26445e-92	4.71327e-91
ENSG00000037749.13	MFAP3	227.019	7.12724	1.41759e-92	5.27789e-91
ENSG00000100888.15	CHD8	223.931	6.20596	1.42794e-92	5.31018e-91
ENSG00000101290.14	CDS2	188.944	6.44982	1.43291e-92	5.32243e-91
ENSG00000144674.17	GOLGA4	271.188	7.11425	1.68902e-92	6.26638e-91
ENSG00000198431.17	TXNRD1	261.195	7.26856	1.8391e-92	6.8152e-91
ENSG00000171848.16	RRM2	216.059	6.24658	1.85163e-92	6.85361e-91
ENSG00000130119.17	GNL3L	225.504	6.49223	2.11802e-92	7.83051e-91
ENSG00000174738.13	NR1D2	248.433	7.14624	2.32923e-92	8.6013e-91
ENSG00000112078.14	KCTD20	327.296	8.15302	2.72607e-92	1.0055e-90
ENSG00000128714.6	HOXD13	259.311	7.37714	3.07614e-92	1.13331e-90
ENSG00000140575.13	IQGAP1	193.732	6.24132	3.19539e-92	1.17587e-90
ENSG00000119396.11	RAB14	393.513	8.59981	3.38038e-92	1.24251e-90
ENSG00000080371.6	RAB21	285.275	7.72362	3.72496e-92	1.36757e-90
ENSG00000078304.20	PPP2R5C	221.328	6.81689	3.97408e-92	1.45735e-90
ENSG00000140577.17	CRTC3	185.767	5.89781	4.8881e-92	1.79046e-90
ENSG00000091542.9	ALKBH5	245.711	7.12768	6.13886e-92	2.246e-90
ENSG00000197077.14	KIAA1671	204.247	6.8636	8.03318e-92	2.93568e-90
ENSG00000057019.16	DCBLD2	205.64	6.61733	8.47593e-92	3.09391e-90
ENSG00000164402.14	SEPTIN8	197.901	6.65922	8.6848e-92	3.1665e-90
ENSG00000175216.15	CKAP5	232.265	6.55091	9.31841e-92	3.39361e-90
ENSG00000111707.12	SUDS3	220.087	7.08615	9.6914e-92	3.5254e-90
ENSG00000167996.16	FTH1	209.71	6.47117	1.18747e-91	4.31467e-90
ENSG00000163291.14	PAQR3	218.693	6.90585	1.26696e-91	4.59822e-90
ENSG00000183723.13	CMTM4	245.481	7.30152	1.61014e-91	5.83702e-90
ENSG00000139645.11	ANKRD52	201.128	6.68534	1.72293e-91	6.23879e-90
ENSG00000104738.18	MCM4	262.163	6.84137	1.75702e-91	6.35497e-90
ENSG00000109787.13	KLF3	227.378	6.91111	1.81485e-91	6.55664e-90
ENSG00000185630.19	PBX1	207.76	6.73654	1.82909e-91	6.60057e-90
ENSG00000177034.17	MTX3	241.335	7.27388	1.92355e-91	6.93057e-90
ENSG00000185722.18	ANKFY1	233.085	6.48865	1.92492e-91	6.93057e-90
ENSG00000106460.19	TMEM106B	226.331	6.95495	1.97274e-91	7.09472e-90
ENSG00000072803.18	FBXW11	329.375	8.16863	2.038e-91	7.32108e-90
ENSG00000134684.13	YARS1	207.531	6.13057	2.47526e-91	8.88177e-90
ENSG00000113575.10	PPP2CA	289.451	7.61161	2.72473e-91	9.76587e-90
ENSG00000092148.14	HECTD1	202.802	6.59686	2.7656e-91	9.90117e-90
ENSG00000177853.15	ZNF518A	248.34	7.26601	2.91701e-91	1.04314e-89
ENSG00000152193.8	OBI1	261.925	7.39829	3.35788e-91	1.19945e-89
ENSG00000162244.12	RPL29	224.845	5.4863	3.39466e-91	1.21122e-89
ENSG00000088832.18	FKBP1A	219.629	6.75449	3.80631e-91	1.35657e-89
ENSG00000126698.11	DNAJC8	214.923	6.58858	4.13843e-91	1.47328e-89
ENSG00000080561.14	MID2	221.888	7.158	4.27416e-91	1.51989e-89
ENSG00000155380.13	SLC16A1	252.327	7.06244	4.52814e-91	1.6084e-89
ENSG00000075151.24	EIF4G3	250.209	6.73442	5.10882e-91	1.81263e-89
ENSG00000153989.8	NUS1	320.348	8.12474	5.36557e-91	1.9016e-89
ENSG00000153936.18	HS2ST1	221.528	7.03417	5.66773e-91	2.00644e-89
ENSG00000140396.13	NCOA2	230.212	6.73634	6.60389e-91	2.33524e-89
ENSG00000005022.6	SLC25A5	173.007	5.86254	6.74472e-91	2.38238e-89
ENSG00000184014.9	DENND5A	198.094	6.31016	7.35283e-91	2.59429e-89
ENSG00000198918.8	RPL39	252.224	5.4254	9.12143e-91	3.21472e-89
ENSG00000187735.15	TCEA1	223.724	6.94014	1.16963e-90	4.11761e-89
ENSG00000257267.4	ZNF271P	244.474	7.06434	1.48624e-90	5.22643e-89
ENSG00000204469.13	PRRC2A	209.441	5.80785	1.51849e-90	5.33391e-89
ENSG00000066654.14	THUMPD1	280.681	7.85061	1.53597e-90	5.38933e-89
ENSG00000282034.1	ENSG00000282034	187.446	6.48131	1.63195e-90	5.71977e-89
ENSG00000091039.17	OSBPL8	224.423	7.00196	1.72253e-90	6.03058e-89
ENSG00000105926.16	PALS2	224.654	7.17626	2.12603e-90	7.43502e-89
ENSG00000175130.7	MARCKSL1	200.069	6.53209	2.40473e-90	8.40038e-89
ENSG00000144580.14	CNOT9	241.18	7.16387	2.47513e-90	8.63679e-89
ENSG00000117114.21	ADGRL2	187.621	6.31057	2.97295e-90	1.03625e-88
ENSG00000166225.9	FRS2	315.314	8.18961	3.15604e-90	1.09886e-88
ENSG00000124208.16	PEDS1-UBE2V1	209.37	7.13605	3.38306e-90	1.17661e-88
ENSG00000012660.14	ELOVL5	209.937	6.84263	3.4178e-90	1.18739e-88
ENSG00000119596.18	YLPM1	203.32	5.94679	3.68485e-90	1.27876e-88
ENSG00000135164.19	DMTF1	228.66	6.72877	3.97748e-90	1.3788e-88
ENSG00000025796.14	SEC63	194.495	6.6808	4.31282e-90	1.49342e-88
ENSG00000120992.18	LYPLA1	243.763	7.23543	4.77147e-90	1.65043e-88
ENSG00000135801.10	TAF5L	209.799	6.79907	5.08211e-90	1.75596e-88
ENSG00000067167.8	TRAM1	266.01	7.29794	5.10269e-90	1.76115e-88
ENSG00000159658.15	EFCAB14	222.048	6.98813	5.24348e-90	1.80777e-88
ENSG00000100722.20	ZC3H14	217.538	6.53368	5.33134e-90	1.83607e-88
ENSG00000102753.10	KPNA3	276.423	7.74958	6.02394e-90	2.07234e-88
ENSG00000091009.8	RBM27	225.746	7.01101	7.46898e-90	2.56667e-88
ENSG00000158636.17	EMSY	197.568	6.4718	7.5717e-90	2.59915e-88
ENSG00000126777.18	KTN1	187.98	5.77348	7.70497e-90	2.64204e-88
ENSG00000058804.12	NDC1	271.694	7.58351	7.85411e-90	2.69027e-88
ENSG00000162702.8	ZNF281	316.728	8.02753	7.93167e-90	2.7139e-88
ENSG00000107341.5	UBE2R2	209.761	6.95783	9.97309e-90	3.40871e-88
ENSG00000169375.16	SIN3A	200.901	6.41097	1.00253e-89	3.42286e-88
ENSG00000170471.15	RALGAPB	220.325	6.91761	1.10014e-89	3.75209e-88
ENSG00000162704.16	ARPC5	210.505	6.85054	1.3137e-89	4.47561e-88
ENSG00000186480.13	INSIG1	279.358	7.76872	1.42004e-89	4.83272e-88
ENSG00000156735.11	BAG4	335.971	8.28173	1.58094e-89	5.37451e-88
ENSG00000196367.14	TRRAP	210.701	5.85379	1.67875e-89	5.70091e-88
ENSG00000154473.18	BUB3	202.108	6.68112	1.69662e-89	5.75544e-88
ENSG00000169967.17	MAP3K2	259.292	7.31988	1.97591e-89	6.69568e-88
ENSG00000166226.13	CCT2	214.677	6.87763	1.98828e-89	6.73042e-88
ENSG00000112851.15	ERBIN	245.017	7.02017	2.19741e-89	7.43039e-88
ENSG00000108443.14	RPS6KB1	240.038	7.21507	2.22416e-89	7.51282e-88
ENSG00000133119.13	RFC3	266.166	7.62213	2.38251e-89	8.03912e-88
ENSG00000186566.13	GPATCH8	256.698	7.18911	2.83561e-89	9.55781e-88
ENSG00000106692.15	FKTN	187.604	6.22726	3.15676e-89	1.0629e-87
ENSG00000117139.18	KDM5B	227.908	6.00309	3.24144e-89	1.09025e-87
ENSG00000065911.13	MTHFD2	210.467	6.55573	3.50763e-89	1.17853e-87
ENSG00000175029.17	CTBP2	266.534	7.3658	3.67705e-89	1.23415e-87
ENSG00000139218.18	SCAF11	234.924	7.01257	4.50373e-89	1.51001e-87
ENSG00000109606.13	DHX15	219.465	6.96823	4.68391e-89	1.56876e-87
ENSG00000174238.16	PITPNA	173.283	6.19922	5.0211e-89	1.67992e-87
ENSG00000169554.23	ZEB2	213.448	6.54243	5.77093e-89	1.92876e-87
ENSG00000114416.18	FXR1	185.532	6.38323	7.85161e-89	2.6214e-87
ENSG00000178691.11	SUZ12	305.861	7.68892	8.7497e-89	2.91816e-87
ENSG00000159346.13	ADIPOR1	191.565	6.61022	9.26876e-89	3.08803e-87
ENSG00000006459.11	KDM7A	225.087	7.24317	9.57858e-89	3.1879e-87
ENSG00000166170.12	BAG5	279.33	7.84795	9.76323e-89	3.24594e-87
ENSG00000185651.16	UBE2L3	223.077	6.70177	9.81812e-89	3.26077e-87
ENSG00000169604.21	ANTXR1	177	6.14846	1.20375e-88	3.99368e-87
ENSG00000196591.12	HDAC2	209.435	6.79291	1.21531e-88	4.02781e-87
ENSG00000104067.17	TJP1	218.648	7.07769	1.46287e-88	4.84322e-87
ENSG00000123728.10	RAP2C	220.996	7.15528	1.85033e-88	6.11962e-87
ENSG00000155744.10	FAM126B	277.582	7.36435	1.88514e-88	6.22823e-87
ENSG00000115758.13	ODC1	187.907	6.31462	2.04824e-88	6.76005e-87
ENSG00000134371.14	CDC73	221.789	7.04087	2.34246e-88	7.72305e-87
ENSG00000102531.16	FNDC3A	242.343	7.22578	2.54447e-88	8.38034e-87
ENSG00000284024.4	ENSG00000284024	280.382	7.93516	2.96143e-88	9.74351e-87
ENSG00000118217.7	ATF6	175.199	6.20834	2.98086e-88	9.79727e-87
ENSG00000139496.17	NUP58	362.963	8.48995	3.30405e-88	1.08482e-86
ENSG00000152700.14	SAR1B	239.274	7.61788	3.45765e-88	1.13408e-86
ENSG00000179134.16	SAMD4B	179.978	6.67663	4.25457e-88	1.39402e-86
ENSG00000173517.11	PEAK1	209.971	6.95309	4.47442e-88	1.46454e-86
ENSG00000134287.10	ARF3	177.652	6.45401	4.53281e-88	1.48212e-86
ENSG00000224470.9	ATXN1L	220.632	7.2123	4.7576e-88	1.55402e-86
ENSG00000124198.10	ARFGEF2	178.912	6.12526	5.82679e-88	1.90043e-86
ENSG00000151503.14	NCAPD3	224.158	6.56676	5.83011e-88	1.90043e-86
ENSG00000204120.16	GIGYF2	204.702	6.87085	5.97394e-88	1.94531e-86
ENSG00000049618.24	ARID1B	172.961	5.392	6.17156e-88	2.00759e-86
ENSG00000010244.19	ZNF207	217.102	6.64775	7.38955e-88	2.40134e-86
ENSG00000181904.9	C5orf24	356.258	8.46054	7.46142e-88	2.42221e-86
ENSG00000165156.15	ZHX1	278.287	7.61697	7.56759e-88	2.45416e-86
ENSG00000144224.17	UBXN4	259.58	7.59208	8.63335e-88	2.79692e-86
ENSG00000101773.19	RBBP8	226.324	6.96307	9.09253e-88	2.94267e-86
ENSG00000213186.8	TRIM59	228.914	7.14418	9.71966e-88	3.14242e-86
ENSG00000116199.12	FAM20B	270.497	7.72338	1.01256e-87	3.27032e-86
ENSG00000165417.12	GTF2A1	306.391	8.14993	1.22143e-87	3.94093e-86
ENSG00000107372.13	ZFAND5	241.39	7.48449	1.23352e-87	3.97588e-86
ENSG00000047410.14	TPR	298.164	5.90381	1.26269e-87	4.06574e-86
ENSG00000108306.13	FBXL20	194.445	6.62901	1.3598e-87	4.37401e-86
ENSG00000124788.19	ATXN1	204.737	6.80976	1.42343e-87	4.57404e-86
ENSG00000140299.13	BNIP2	254.723	7.63349	1.481e-87	4.75422e-86
ENSG00000011426.11	ANLN	247.303	7.44479	1.50286e-87	4.81948e-86
ENSG00000107290.14	SETX	236.895	7.2534	1.52667e-87	4.8909e-86
ENSG00000164045.12	CDC25A	227.202	6.51177	1.58564e-87	5.07467e-86
ENSG00000135932.12	CAB39	205.15	6.98368	1.65782e-87	5.30034e-86
ENSG00000140526.18	ABHD2	197.337	6.93019	1.66941e-87	5.33201e-86
ENSG00000143420.19	ENSA	178.192	6.07964	1.69876e-87	5.4203e-86
ENSG00000151292.18	CSNK1G3	236.787	7.31671	1.79156e-87	5.71065e-86
ENSG00000115053.17	NCL	340.326	4.70731	1.86901e-87	5.95154e-86
ENSG00000141380.14	SS18	239.775	7.27005	2.03409e-87	6.4707e-86
ENSG00000145495.16	MARCHF6	248.9	7.38701	2.07447e-87	6.59254e-86
ENSG00000064726.10	BTBD1	257.927	7.31924	2.17289e-87	6.89838e-86
ENSG00000162664.17	ZNF326	195.13	5.3899	2.27236e-87	7.20696e-86
ENSG00000113615.13	SEC24A	248.058	7.52002	2.73771e-87	8.67417e-86
ENSG00000057608.17	GDI2	216.158	7.05732	2.80977e-87	8.89357e-86
ENSG00000175414.7	ARL10	215.918	7.2478	3.19403e-87	1.00998e-85
ENSG00000169180.12	XPO6	189.373	6.50044	3.30075e-87	1.04268e-85
ENSG00000198876.13	DCAF12	240.961	7.40441	3.34868e-87	1.05677e-85
ENSG00000189079.17	ARID2	220.935	7.03407	3.37906e-87	1.06529e-85
ENSG00000149136.9	SSRP1	178.476	5.84026	3.39411e-87	1.06897e-85
ENSG00000148229.13	POLE3	210.506	7.02223	3.5126e-87	1.1052e-85
ENSG00000170921.16	TANC2	160.007	6.03733	3.60304e-87	1.13253e-85
ENSG00000067225.20	PKM	163.983	5.15368	3.61161e-87	1.1341e-85
ENSG00000103769.10	RAB11A	209.033	6.95508	4.09326e-87	1.28407e-85
ENSG00000115762.17	PLEKHB2	260.091	7.74552	4.35447e-87	1.36466e-85
ENSG00000156304.15	SCAF4	233.864	7.1817	5.12272e-87	1.60384e-85
ENSG00000136731.13	UGGT1	177.976	6.24098	6.22209e-87	1.94611e-85
ENSG00000124766.7	SOX4	280.967	7.85792	7.14729e-87	2.23328e-85
ENSG00000185619.18	PCGF3	188.691	6.86071	7.33653e-87	2.29015e-85
ENSG00000134243.12	SORT1	197.907	6.47082	7.72091e-87	2.40628e-85
ENSG00000165288.11	BRWD3	176.898	6.30977	7.72374e-87	2.40628e-85
ENSG00000146373.17	RNF217	228.695	7.0894	8.84843e-87	2.75397e-85
ENSG00000178502.6	KLHL11	270.973	7.80315	9.7207e-87	3.02248e-85
ENSG00000116962.15	NID1	211.343	6.86367	1.06858e-86	3.31929e-85
ENSG00000143324.14	XPR1	196.428	6.64758	1.33917e-86	4.15577e-85
ENSG00000163681.16	SLMAP	201.157	6.63651	1.54622e-86	4.79359e-85
ENSG00000125166.13	GOT2	178.943	6.3746	1.65752e-86	5.13361e-85
ENSG00000175061.19	SNHG29	185.05	6.50511	1.7986e-86	5.56512e-85
ENSG00000166135.14	HIF1AN	187.814	6.22762	1.81012e-86	5.59529e-85
ENSG00000101856.10	PGRMC1	239.549	7.33666	2.06093e-86	6.36437e-85
ENSG00000120733.14	KDM3B	186.796	6.15007	2.41176e-86	7.44054e-85
ENSG00000103994.18	ZNF106	201.94	6.90344	2.41484e-86	7.44279e-85
ENSG00000110172.12	CHORDC1	206.393	6.87851	2.50182e-86	7.70336e-85
ENSG00000177125.6	ZBTB34	284.855	8.04237	2.60669e-86	8.01848e-85
ENSG00000115966.18	ATF2	234.049	7.23234	3.13701e-86	9.64044e-85
ENSG00000143319.17	ISG20L2	188.679	6.74518	3.33964e-86	1.02532e-84
ENSG00000048649.14	RSF1	255.007	6.98464	3.61812e-86	1.10974e-84
ENSG00000230590.12	FTX	156.168	5.65022	3.68703e-86	1.12979e-84
ENSG00000151135.10	TMEM263	268.021	7.8632	3.71122e-86	1.1361e-84
ENSG00000134987.13	WDR36	215.933	7.00633	3.90446e-86	1.1941e-84
ENSG00000118260.15	CREB1	269.246	7.38912	4.17779e-86	1.27646e-84
ENSG00000157933.10	SKI	242.046	7.55015	4.71924e-86	1.44051e-84
ENSG00000167995.17	BEST1	171.808	5.88342	5.99451e-86	1.82801e-84
ENSG00000144895.12	EIF2A	205.348	6.98675	6.01372e-86	1.8321e-84
ENSG00000074603.19	DPP8	164.361	6.24264	6.05842e-86	1.84395e-84
ENSG00000172939.9	OXSR1	228.577	7.13586	6.70341e-86	2.0383e-84
ENSG00000082258.13	CCNT2	261.366	7.6008	7.4483e-86	2.26263e-84
ENSG00000113048.18	MRPS27	169.477	5.73528	7.95894e-86	2.41543e-84
ENSG00000288642.1	CDR1	161.816	6.58211	9.00328e-86	2.72976e-84
ENSG00000137203.15	TFAP2A	182.246	6.81051	1.01511e-85	3.07483e-84
ENSG00000139154.16	AEBP2	200.608	6.45658	1.03486e-85	3.13165e-84
ENSG00000174695.10	TMEM167A	246.729	7.66386	1.20199e-85	3.63395e-84
ENSG00000047932.14	GOPC	234.484	7.51525	1.25009e-85	3.77578e-84
ENSG00000181472.5	ZBTB2	248.006	7.38611	1.30641e-85	3.94212e-84
ENSG00000148110.17	MFSD14B	240.759	7.47775	1.33769e-85	4.03267e-84
ENSG00000107863.20	ARHGAP21	218.449	6.96299	1.43645e-85	4.32627e-84
ENSG00000110851.12	PRDM4	259.258	7.74369	1.51297e-85	4.55242e-84
ENSG00000035928.17	RFC1	206.511	6.93482	1.53383e-85	4.61081e-84
ENSG00000012048.23	BRCA1	219.875	6.71705	1.60924e-85	4.83291e-84
ENSG00000165219.23	GAPVD1	224.551	6.74534	1.99211e-85	5.97708e-84
ENSG00000147050.17	KDM6A	223.987	6.89417	2.02986e-85	6.08459e-84
ENSG00000143924.19	EML4	205.196	7.04268	2.15631e-85	6.45751e-84
ENSG00000162819.12	BROX	273.928	7.9853	2.42534e-85	7.25632e-84
ENSG00000055070.17	SZRD1	176.015	6.48778	2.49995e-85	7.47249e-84
ENSG00000156273.16	BACH1	239.787	7.33802	2.65641e-85	7.93267e-84
ENSG00000170653.19	ATF7	196.071	7.1116	2.73927e-85	8.17241e-84
ENSG00000172888.12	ZNF621	183.765	6.45653	2.96404e-85	8.83469e-84
ENSG00000147955.18	SIGMAR1	173.84	6.80596	3.13923e-85	9.34805e-84
ENSG00000162408.11	NOL9	228.056	7.01981	3.44337e-85	1.02416e-83
ENSG00000198380.13	GFPT1	219.039	7.26847	3.44574e-85	1.02416e-83
ENSG00000100350.16	FOXRED2	200.032	6.94447	3.45136e-85	1.02486e-83
ENSG00000125648.15	SLC25A23	147.185	5.9104	3.47836e-85	1.03191e-83
ENSG00000062725.10	APPBP2	215.876	7.00174	3.59052e-85	1.06419e-83
ENSG00000146731.11	CCT6A	218.377	6.85509	4.04631e-85	1.19816e-83
ENSG00000058272.19	PPP1R12A	192.116	6.72151	4.94457e-85	1.46278e-83
ENSG00000131368.9	MRPS25	193.914	6.7806	5.52586e-85	1.63322e-83
ENSG00000161021.13	MAML1	203.65	6.91304	5.77085e-85	1.70404e-83
ENSG00000139726.11	DENR	191.64	6.76907	8.19629e-85	2.41798e-83
ENSG00000100528.12	CNIH1	236.268	7.44996	8.30082e-85	2.44654e-83
ENSG00000082805.21	ERC1	160.413	6.17131	9.65905e-85	2.84421e-83
ENSG00000023228.14	NDUFS1	191.483	6.88069	1.32949e-84	3.9112e-83
ENSG00000175582.20	RAB6A	234.472	7.59147	1.35209e-84	3.97399e-83
ENSG00000155097.12	ATP6V1C1	207.314	7.41052	1.48407e-84	4.35785e-83
ENSG00000131381.12	RBSN	164.952	6.08622	1.49526e-84	4.38665e-83
ENSG00000115306.16	SPTBN1	187.774	5.98919	1.54688e-84	4.5339e-83
ENSG00000131473.17	ACLY	196.699	5.88605	1.60525e-84	4.70062e-83
ENSG00000114127.11	XRN1	192.642	6.72265	2.0215e-84	5.91405e-83
ENSG00000138688.17	KIAA1109	158.522	5.38293	2.12116e-84	6.19989e-83
ENSG00000173598.14	NUDT4	230.59	7.3501	2.59509e-84	7.57814e-83
ENSG00000230551.4	ENSG00000230551	218.097	7.33704	2.66286e-84	7.76889e-83
ENSG00000089902.10	RCOR1	218.299	7.26606	2.76552e-84	8.06096e-83
ENSG00000170540.15	ARL6IP1	270.607	8.05728	2.77826e-84	8.09066e-83
ENSG00000081019.14	RSBN1	217.965	7.13531	2.80373e-84	8.15733e-83
ENSG00000067900.8	ROCK1	204.205	6.80577	3.64686e-84	1.06007e-82
ENSG00000119906.13	SLF2	213.057	6.87083	4.52465e-84	1.31401e-82
ENSG00000126773.13	PCNX4	201.805	7.01928	4.83522e-84	1.40292e-82
ENSG00000111206.13	FOXM1	199.811	7.13533	5.04746e-84	1.46316e-82
ENSG00000070831.18	CDC42	172.927	6.07212	5.08843e-84	1.47369e-82
ENSG00000182263.14	FIGN	185.004	7.02623	5.62798e-84	1.62847e-82
ENSG00000163608.15	NEPRO	207.642	7.19519	9.36307e-84	2.70675e-82
ENSG00000166004.15	CEP295	250.932	7.34198	1.00859e-83	2.91304e-82
ENSG00000123472.13	ATPAF1	206.9	6.77492	1.01675e-83	2.93395e-82
ENSG00000198087.7	CD2AP	220.575	7.02472	1.06345e-83	3.06591e-82
ENSG00000091317.8	CMTM6	209.719	7.20104	1.15181e-83	3.31764e-82
ENSG00000106105.15	GARS1	192.389	6.34354	1.2276e-83	3.53273e-82
ENSG00000170248.15	PDCD6IP	203.972	6.74803	1.51581e-83	4.35817e-82
ENSG00000196584.3	XRCC2	202.47	7.02825	1.91342e-83	5.49635e-82
ENSG00000163625.16	WDFY3	198.616	6.00069	1.96012e-83	5.62541e-82
ENSG00000151914.22	DST	202.188	5.36393	1.99791e-83	5.72868e-82
ENSG00000206527.10	HACD2	201.052	7.14894	2.28109e-83	6.53472e-82
ENSG00000137770.14	CTDSPL2	309.573	8.25294	2.41367e-83	6.90829e-82
ENSG00000111615.14	KRR1	216.288	7.32288	2.83954e-83	8.11984e-82
ENSG00000239264.9	TXNDC5	176.024	6.58939	3.04983e-83	8.71334e-82
ENSG00000171314.9	PGAM1	163.856	6.5424	3.17932e-83	9.0751e-82
ENSG00000229117.9	RPL41	179.271	5.35191	3.52569e-83	1.00547e-81
ENSG00000128245.15	YWHAH	212.327	7.03575	3.82807e-83	1.09072e-81
ENSG00000070950.10	RAD18	228.287	7.54954	4.07641e-83	1.16044e-81
ENSG00000156802.13	ATAD2	233.78	7.37373	4.26405e-83	1.21277e-81
ENSG00000068878.15	PSME4	200.084	6.88685	4.57941e-83	1.30129e-81
ENSG00000172667.11	ZMAT3	204.079	7.23716	4.74404e-83	1.34687e-81
ENSG00000115355.18	CCDC88A	184.701	6.42089	5.07091e-83	1.43838e-81
ENSG00000166454.10	ATMIN	210.064	7.35344	6.41381e-83	1.81767e-81
ENSG00000213463.5	SYNJ2BP	194.466	7.02936	6.88754e-83	1.95018e-81
ENSG00000180182.11	MED14	183.626	6.45412	7.32838e-83	2.07315e-81
ENSG00000066084.13	DIP2B	172.889	6.67006	7.36305e-83	2.0811e-81
ENSG00000115365.12	LANCL1	198.896	7.19754	7.69432e-83	2.17279e-81
ENSG00000065135.12	GNAI3	224.816	7.38104	7.84102e-83	2.21224e-81
ENSG00000100523.16	DDHD1	156.957	6.42829	8.25647e-83	2.32738e-81
ENSG00000114867.22	EIF4G1	191.506	5.82283	8.70694e-83	2.45218e-81
ENSG00000133606.11	MKRN1	183.964	6.27892	8.94316e-83	2.51648e-81
ENSG00000075391.18	RASAL2	155.312	6.12025	9.36993e-83	2.63422e-81
ENSG00000114030.13	KPNA1	232.223	7.57926	9.49348e-83	2.66659e-81
ENSG00000275052.5	PPP4R3B	210.131	7.02134	1.00041e-82	2.80753e-81
ENSG00000075292.19	ZNF638	210.476	6.61646	1.11447e-82	3.12487e-81
ENSG00000134001.15	EIF2S1	181.072	6.63598	1.19158e-82	3.3381e-81
ENSG00000259040.5	BLOC1S5-TXNDC5	180.052	6.73196	1.24338e-82	3.48014e-81
ENSG00000097046.13	CDC7	233.218	7.42958	1.27015e-82	3.55195e-81
ENSG00000182150.19	ERCC6L2	213.852	6.9881	1.29399e-82	3.61541e-81
ENSG00000177189.14	RPS6KA3	195.175	6.74862	1.29783e-82	3.62294e-81
ENSG00000101003.11	GINS1	212.512	7.23004	1.60241e-82	4.46925e-81
ENSG00000116704.8	SLC35D1	211.877	7.44563	1.6713e-82	4.65729e-81
ENSG00000162980.17	ARL5A	238.109	7.46916	1.75716e-82	4.89226e-81
ENSG00000006831.10	ADIPOR2	219.162	7.33934	1.9116e-82	5.31758e-81
ENSG00000172534.14	HCFC1	146.338	5.55979	2.19873e-82	6.11092e-81
ENSG00000101849.18	TBL1X	164.224	6.32972	2.40026e-82	6.6652e-81
ENSG00000053254.16	FOXN3	209.243	7.35086	2.47734e-82	6.87322e-81
ENSG00000139977.14	NAA30	203.7	7.0968	2.48083e-82	6.87686e-81
ENSG00000084463.8	WBP11	186.674	6.85207	2.70851e-82	7.50143e-81
ENSG00000171863.15	RPS7	153.208	5.12288	2.80524e-82	7.76256e-81
ENSG00000116903.7	EXOC8	252.863	7.78159	2.90328e-82	8.02683e-81
ENSG00000113580.15	NR3C1	213.398	7.30071	3.21093e-82	8.86967e-81
ENSG00000100281.14	HMGXB4	184.606	6.77549	3.49516e-82	9.6464e-81
ENSG00000168807.17	SNTB2	218.497	7.49535	3.98322e-82	1.09838e-80
ENSG00000174840.9	PDE12	239.289	7.33717	4.12442e-82	1.13633e-80
ENSG00000167548.18	KMT2D	160.383	6.00068	4.85911e-82	1.33758e-80
ENSG00000119729.12	RHOQ	183.016	6.69847	5.0134e-82	1.37886e-80
ENSG00000069329.18	VPS35	184.922	6.82945	5.07601e-82	1.39487e-80
ENSG00000071054.17	MAP4K4	148.385	5.63847	5.63591e-82	1.54739e-80
ENSG00000177463.16	NR2C2	197.352	6.98154	5.79303e-82	1.58915e-80
ENSG00000177954.14	RPS27	146.75	5.20144	5.81346e-82	1.59337e-80
ENSG00000119138.5	KLF9	227.868	7.5517	5.95193e-82	1.62991e-80
ENSG00000198586.14	TLK1	237.663	7.20464	6.14914e-82	1.68246e-80
ENSG00000136451.9	VEZF1	270.878	7.9662	6.30565e-82	1.7238e-80
ENSG00000107651.14	SEC23IP	217.603	7.40541	6.345e-82	1.73306e-80
ENSG00000134852.15	CLOCK	261.185	7.91648	6.35681e-82	1.73479e-80
ENSG00000266028.8	SRGAP2	139.783	5.92657	6.73525e-82	1.83649e-80
ENSG00000111481.10	COPZ1	175.165	6.69592	7.35499e-82	2.00375e-80
ENSG00000060339.14	CCAR1	197.245	6.47187	8.12059e-82	2.21042e-80
ENSG00000137504.15	CREBZF	206.395	7.1879	8.26519e-82	2.24785e-80
ENSG00000115806.13	GORASP2	203.461	6.97453	8.45693e-82	2.29802e-80
ENSG00000197930.13	ERO1A	185.368	7.02634	1.01085e-81	2.74444e-80
ENSG00000260836.2	ENSG00000260836	166.543	5.56707	1.03281e-81	2.80167e-80
ENSG00000198646.14	NCOA6	223.531	7.44694	1.04442e-81	2.83076e-80
ENSG00000188211.9	NCR3LG1	193.958	7.16092	1.22932e-81	3.32903e-80
ENSG00000100426.7	ZBED4	173	6.73632	1.28337e-81	3.47245e-80
ENSG00000288725.1	ENSG00000288725	229.206	7.56074	1.33955e-81	3.62136e-80
ENSG00000174839.13	DENND6A	198.45	7.19629	1.44727e-81	3.90924e-80
ENSG00000175390.15	EIF3F	166	5.59218	1.48537e-81	4.00872e-80
ENSG00000116350.18	SRSF4	164.218	6.39112	1.53397e-81	4.13638e-80
ENSG00000165699.15	TSC1	172.74	6.11812	1.63947e-81	4.41708e-80
ENSG00000138434.17	ITPRID2	177.378	6.89828	1.66856e-81	4.49164e-80
ENSG00000143437.21	ARNT	154.756	6.41061	1.75371e-81	4.71685e-80
ENSG00000164070.12	HSPA4L	210.402	6.96239	2.25404e-81	6.05741e-80
ENSG00000198755.11	RPL10A	143.443	5.49925	2.27029e-81	6.09592e-80
ENSG00000168246.6	UBTD2	245.309	7.66041	2.54422e-81	6.82566e-80
ENSG00000123473.17	STIL	207.531	7.13076	2.55912e-81	6.85982e-80
ENSG00000089916.18	GPATCH2L	174.097	6.74729	2.57343e-81	6.89235e-80
ENSG00000095564.15	BTAF1	214.904	6.64511	2.59794e-81	6.95212e-80
ENSG00000096401.8	CDC5L	214.62	6.8776	2.6199e-81	7.00496e-80
ENSG00000143515.20	ATP8B2	162.428	6.05716	2.72906e-81	7.29069e-80
ENSG00000162924.15	REL	165.35	6.55146	2.80675e-81	7.49193e-80
ENSG00000196850.6	PPTC7	262.247	8.01442	2.94229e-81	7.8471e-80
ENSG00000153904.21	DDAH1	180.14	6.92094	3.0765e-81	8.19813e-80
ENSG00000272886.6	DCP1A	297.312	8.29451	3.29207e-81	8.7652e-80
ENSG00000115020.17	PIKFYVE	186.668	6.9121	3.47155e-81	9.23531e-80
ENSG00000104343.21	UBE2W	218.097	7.19332	3.60576e-81	9.58431e-80
ENSG00000140836.17	ZFHX3	171.831	6.45624	3.8472e-81	1.02175e-79
ENSG00000085832.17	EPS15	186.15	6.30465	4.82118e-81	1.27935e-79
ENSG00000182774.13	RPS17	163.328	5.5376	4.83911e-81	1.28303e-79
ENSG00000119707.14	RBM25	263.941	4.90163	5.23133e-81	1.38586e-79
ENSG00000180776.16	ZDHHC20	230.502	7.6567	6.01011e-81	1.59085e-79
ENSG00000101057.16	MYBL2	147.747	5.92087	6.43749e-81	1.70255e-79
ENSG00000161547.17	SRSF2	225.51	7.25415	7.61654e-81	2.0127e-79
ENSG00000127804.13	METTL16	171.017	6.45078	7.68911e-81	2.03018e-79
ENSG00000146587.18	RBAK	210.562	7.15174	8.1944e-81	2.16179e-79
ENSG00000151131.11	NOPCHAP1	147.326	6.00554	9.17373e-81	2.41814e-79
ENSG00000196505.11	GDAP2	204.411	7.04362	9.36049e-81	2.46532e-79
ENSG00000185551.15	NR2F2	179.738	6.796	1.01763e-80	2.67794e-79
ENSG00000145147.20	SLIT2	203.16	6.90564	1.02113e-80	2.68493e-79
ENSG00000152484.14	USP12	264.166	7.84867	1.05615e-80	2.77473e-79
ENSG00000170606.16	HSPA4	242.369	5.97168	1.12712e-80	2.95871e-79
ENSG00000062194.16	GPBP1	233.132	7.50485	1.15689e-80	3.03434e-79
ENSG00000131236.18	CAP1	203.702	7.09884	1.20657e-80	3.16204e-79
ENSG00000067533.6	RRP15	203.793	7.16573	1.21633e-80	3.18497e-79
ENSG00000107854.6	TNKS2	273.67	7.81452	1.2955e-80	3.38947e-79
ENSG00000155545.20	MIER3	200.907	7.14284	1.39126e-80	3.63702e-79
ENSG00000176018.13	LYSMD3	238.685	7.61946	1.47815e-80	3.86098e-79
ENSG00000122218.17	COPA	160.432	5.96566	1.55151e-80	4.04927e-79
ENSG00000181704.12	YIPF6	198.082	6.99339	1.65801e-80	4.32366e-79
ENSG00000169813.17	HNRNPF	226.956	7.38886	1.84084e-80	4.79648e-79
ENSG00000006607.14	FARP2	178.413	6.72038	1.95684e-80	5.09454e-79
ENSG00000113407.14	TARS1	232.311	7.22749	2.24744e-80	5.8463e-79
ENSG00000060982.15	BCAT1	225.294	7.52957	2.26675e-80	5.89169e-79
ENSG00000112701.18	SENP6	185	6.42372	2.34534e-80	6.09097e-79
ENSG00000170145.5	SIK2	193.912	6.9673	2.42373e-80	6.28939e-79
ENSG00000144597.14	EAF1	193.584	7.1643	2.66194e-80	6.90187e-79
ENSG00000116133.13	DHCR24	183.634	6.31598	2.98208e-80	7.72561e-79
ENSG00000182963.11	GJC1	216.696	7.48052	3.35385e-80	8.68164e-79
ENSG00000109189.13	USP46	200.038	7.35998	3.50037e-80	9.05352e-79
ENSG00000132640.15	BTBD3	275.948	8.29419	4.42582e-80	1.14378e-78
ENSG00000101413.12	RPRD1B	194.876	7.03046	4.70188e-80	1.21414e-78
ENSG00000112118.20	MCM3	149.22	6.10518	5.03669e-80	1.29953e-78
ENSG00000136715.19	SAP130	178.422	6.72568	5.48706e-80	1.41458e-78
ENSG00000158321.18	AUTS2	180.744	6.06269	5.49974e-80	1.4167e-78
ENSG00000197147.15	LRRC8B	203.376	7.22667	5.55041e-80	1.42859e-78
ENSG00000103018.18	CYB5B	162.42	6.644	5.72699e-80	1.47284e-78
ENSG00000132155.14	RAF1	176.267	6.02346	5.79185e-80	1.48831e-78
ENSG00000154642.11	C21orf91	226.244	7.70925	6.10079e-80	1.56643e-78
ENSG00000134910.14	STT3A	177.601	6.96664	6.15281e-80	1.57851e-78
ENSG00000124356.17	STAMBP	159.996	6.258	6.38034e-80	1.63555e-78
ENSG00000144136.11	SLC20A1	225.054	7.12202	6.47267e-80	1.65788e-78
ENSG00000119912.18	IDE	163.545	5.91714	6.85206e-80	1.75364e-78
ENSG00000204569.10	PPP1R10	176.562	6.70595	6.91252e-80	1.76769e-78
ENSG00000128059.8	PPAT	199.352	7.20669	6.95064e-80	1.776e-78
ENSG00000257379.1	ENSG00000257379	172.348	6.40812	9.36124e-80	2.39002e-78
ENSG00000106086.20	PLEKHA8	183.491	6.94579	9.67155e-80	2.46726e-78
ENSG00000077232.19	DNAJC10	175.754	6.21409	1.12288e-79	2.86222e-78
ENSG00000140941.14	MAP1LC3B	193.185	7.09063	1.1291e-79	2.87575e-78
ENSG00000162695.12	SLC30A7	244.558	7.58012	1.18917e-79	3.02633e-78
ENSG00000162378.13	ZYG11B	302.821	8.3263	1.22262e-79	3.10894e-78
ENSG00000169641.14	LUZP1	174.482	6.63318	1.22556e-79	3.11393e-78
ENSG00000143514.17	TP53BP2	189.651	6.8762	1.35623e-79	3.44317e-78
ENSG00000145741.17	BTF3	176.747	6.60272	1.41338e-79	3.5854e-78
ENSG00000198369.10	SPRED2	193.704	6.89885	1.42058e-79	3.60078e-78
ENSG00000154174.8	TOMM70	170.876	6.84179	1.44919e-79	3.67035e-78
ENSG00000173065.14	FAM222B	155.261	6.46221	1.5428e-79	3.90433e-78
ENSG00000114062.22	UBE3A	183.34	6.94555	1.63681e-79	4.13893e-78
ENSG00000102580.15	DNAJC3	229.442	7.41986	1.65758e-79	4.18809e-78
ENSG00000164944.12	VIRMA	198.395	6.71452	1.8614e-79	4.69934e-78
ENSG00000149313.11	AASDHPPT	225.38	7.61111	1.88086e-79	4.74467e-78
ENSG00000065328.17	MCM10	206.532	7.05735	1.89901e-79	4.78666e-78
ENSG00000096746.18	HNRNPH3	162.603	5.17944	1.90635e-79	4.80134e-78
ENSG00000147065.17	MSN	158.223	6.66823	1.99545e-79	5.02175e-78
ENSG00000171208.10	NETO2	206.448	6.88099	2.11467e-79	5.31756e-78
ENSG00000088205.13	DDX18	178.001	6.72658	2.29896e-79	5.77638e-78
ENSG00000172954.14	LCLAT1	226.924	7.4706	2.37157e-79	5.9541e-78
ENSG00000163104.18	SMARCAD1	200.021	7.21524	2.42981e-79	6.09549e-78
ENSG00000138802.11	SEC24B	231.499	7.57432	2.73511e-79	6.85596e-78
ENSG00000160785.14	SLC25A44	147.568	6.23158	2.93966e-79	7.36287e-78
ENSG00000143418.20	CERS2	146.479	6.38237	3.62452e-79	9.06476e-78
ENSG00000197969.14	VPS13A	225.033	7.11739	3.62487e-79	9.06476e-78
ENSG00000188848.17	BEND4	173.89	6.42157	4.21409e-79	1.05299e-77
ENSG00000096717.12	SIRT1	190.713	6.93902	4.33033e-79	1.08118e-77
ENSG00000183291.18	SELENOF	159.222	6.67946	4.37877e-79	1.09242e-77
ENSG00000086061.16	DNAJA1	170.735	6.30976	4.54483e-79	1.13295e-77
ENSG00000096696.15	DSP	161.246	6.04618	4.78223e-79	1.1912e-77
ENSG00000108582.12	CPD	211.227	7.15582	4.9192e-79	1.22435e-77
ENSG00000147162.14	OGT	171.076	6.44579	5.06259e-79	1.25905e-77
ENSG00000049245.13	VAMP3	222.393	7.68645	5.21054e-79	1.29483e-77
ENSG00000112029.10	FBXO5	260.476	7.74533	5.5222e-79	1.3712e-77
ENSG00000132824.14	SERINC3	169.683	6.97112	6.61659e-79	1.64166e-77
ENSG00000154727.11	GABPA	243.548	7.42816	6.99909e-79	1.7352e-77
ENSG00000164066.13	INTU	157.449	6.32513	7.08818e-79	1.75592e-77
ENSG00000134109.11	EDEM1	183.163	7.00829	7.35676e-79	1.82103e-77
ENSG00000114904.13	NEK4	184.337	6.82459	8.09622e-79	2.0025e-77
ENSG00000116750.14	UCHL5	177.471	6.71269	8.22662e-79	2.03317e-77
ENSG00000134318.15	ROCK2	199.948	7.01089	8.94319e-79	2.20854e-77
ENSG00000116095.11	PLEKHA3	211.149	7.44152	9.5322e-79	2.35217e-77
ENSG00000123091.5	RNF11	217.874	7.41536	9.84402e-79	2.42722e-77
ENSG00000187231.14	SESTD1	156.738	6.21822	9.99474e-79	2.46247e-77
ENSG00000107771.17	CCSER2	202.055	6.49541	1.0334e-78	2.54408e-77
ENSG00000137492.9	THAP12	197.892	7.19689	1.09145e-78	2.68491e-77
ENSG00000169855.21	ROBO1	187.793	6.34944	1.1682e-78	2.87147e-77
ENSG00000197006.15	METTL9	168.57	6.69558	1.26769e-78	3.11361e-77
ENSG00000151923.18	TIAL1	181.489	6.63819	1.39389e-78	3.42091e-77
ENSG00000119231.11	SENP5	195.463	7.32762	1.53339e-78	3.76037e-77
ENSG00000153147.6	SMARCA5	196.449	6.65076	1.56883e-78	3.84431e-77
ENSG00000284803.1	ENSG00000284803	153.709	5.59611	2.27872e-78	5.57951e-77
ENSG00000180530.11	NRIP1	194.386	7.24525	2.40919e-78	5.89443e-77
ENSG00000198900.7	TOP1	191.637	6.35178	2.56179e-78	6.26294e-77
ENSG00000101191.17	DIDO1	158.93	6.73571	2.79158e-78	6.81945e-77
ENSG00000078403.17	MLLT10	174.913	6.69854	3.30089e-78	8.05744e-77
ENSG00000271601.4	LIX1L	186.217	7.43043	3.39686e-78	8.28531e-77
ENSG00000197343.11	ZNF655	192.046	6.95043	3.726e-78	9.08111e-77
ENSG00000136492.10	BRIP1	172.902	6.62234	4.28598e-78	1.04379e-76
ENSG00000117036.12	ETV3	212.075	7.22019	4.8388e-78	1.17751e-76
ENSG00000112159.12	MDN1	181.707	5.66778	5.91596e-78	1.43854e-76
ENSG00000169635.10	HIC2	172.264	6.55993	6.39068e-78	1.55278e-76
ENSG00000187555.16	USP7	195.147	6.54961	6.45287e-78	1.56669e-76
ENSG00000230989.8	HSBP1	165.931	6.46238	6.94393e-78	1.68462e-76
ENSG00000211460.12	TSN	205.318	7.48474	7.31581e-78	1.77233e-76
ENSG00000043355.12	ZIC2	235.405	7.95725	7.31664e-78	1.77233e-76
ENSG00000083099.11	LYRM2	223.007	7.69401	7.35423e-78	1.78007e-76
ENSG00000142166.13	IFNAR1	170.683	6.9097	9.43292e-78	2.28147e-76
ENSG00000276644.5	DACH1	204.918	7.47991	9.71133e-78	2.34702e-76
ENSG00000196247.13	ZNF107	190.315	6.94134	1.00587e-77	2.42913e-76
ENSG00000139324.12	TMTC3	184.924	7.02618	1.16612e-77	2.81397e-76
ENSG00000100614.18	PPM1A	192.293	7.22682	1.174e-77	2.83081e-76
ENSG00000131747.15	TOP2A	276.966	8.10602	1.38326e-77	3.33286e-76
ENSG00000150347.17	ARID5B	182.137	6.87414	1.40299e-77	3.37784e-76
ENSG00000173258.13	ZNF483	190.441	7.2121	1.4257e-77	3.4299e-76
ENSG00000011007.13	ELOA	192.438	6.77611	1.53987e-77	3.70176e-76
ENSG00000148200.17	NR6A1	167.479	6.74908	1.57764e-77	3.78969e-76
ENSG00000140262.18	TCF12	168.981	6.8937	1.64318e-77	3.94412e-76
ENSG00000133704.10	IPO8	177.269	6.96252	1.7262e-77	4.14027e-76
ENSG00000173542.9	MOB1B	256.57	8.0865	1.86423e-77	4.46795e-76
ENSG00000060138.13	YBX3	161.244	5.86429	1.95489e-77	4.68168e-76
ENSG00000122741.16	DCAF10	192.511	7.01363	2.01886e-77	4.83123e-76
ENSG00000155959.12	VBP1	189.611	6.92784	2.16977e-77	5.18845e-76
ENSG00000171865.10	RNASEH1	184.232	7.0977	2.17755e-77	5.20313e-76
ENSG00000177479.20	ARIH2	182.812	6.64785	2.25303e-77	5.37943e-76
ENSG00000118579.13	MED28	181.078	7.21144	2.27249e-77	5.42181e-76
ENSG00000117569.19	PTBP2	176.268	6.03045	2.38044e-77	5.67508e-76
ENSG00000109654.16	TRIM2	162.828	6.58911	2.4156e-77	5.75458e-76
ENSG00000163812.15	ZDHHC3	142.705	6.28814	2.43076e-77	5.78633e-76
ENSG00000108389.10	MTMR4	174.801	6.94856	2.45959e-77	5.85057e-76
ENSG00000143179.16	UCK2	153.911	6.44989	2.61975e-77	6.22686e-76
ENSG00000138674.17	SEC31A	179.949	6.79902	2.71154e-77	6.4402e-76
ENSG00000161970.15	RPL26	144.219	5.76883	2.88917e-77	6.85697e-76
ENSG00000117859.19	OSBPL9	145.785	6.21895	2.9368e-77	6.96479e-76
ENSG00000152192.8	POU4F1	148.252	6.51133	3.07212e-77	7.28027e-76
ENSG00000054267.22	ARID4B	243.479	6.18454	3.16603e-77	7.4972e-76
ENSG00000180357.10	ZNF609	140.845	6.22112	3.65458e-77	8.64762e-76
ENSG00000105778.20	AVL9	163.145	6.84143	4.16812e-77	9.85542e-76
ENSG00000213341.11	CHUK	187.463	6.9194	5.1993e-77	1.22845e-75
ENSG00000108055.11	SMC3	205.097	6.37074	5.73946e-77	1.35506e-75
ENSG00000116497.18	S100PBP	142.884	6.28915	5.99432e-77	1.41418e-75
ENSG00000173744.18	AGFG1	286.003	8.24194	6.04234e-77	1.42445e-75
ENSG00000166439.6	RNF169	222.353	7.68501	6.1643e-77	1.45212e-75
ENSG00000101350.8	KIF3B	157.312	6.86384	6.50901e-77	1.53218e-75
ENSG00000149658.18	YTHDF1	232.496	7.75366	7.22597e-77	1.69969e-75
ENSG00000166167.18	BTRC	165.806	6.5062	7.27438e-77	1.7098e-75
ENSG00000100077.16	GRK3	200.665	7.53506	8.69272e-77	2.04166e-75
ENSG00000108861.9	DUSP3	180.655	7.21667	9.06578e-77	2.1277e-75
ENSG00000107937.19	GTPBP4	163.993	6.48765	9.17203e-77	2.15105e-75
ENSG00000150867.14	PIP4K2A	165.72	6.61703	9.28312e-77	2.17549e-75
ENSG00000148516.23	ZEB1	159.797	6.21258	1.02853e-76	2.40858e-75
ENSG00000108468.15	CBX1	159.481	6.74944	1.07697e-76	2.52014e-75
ENSG00000138750.16	NUP54	152.266	6.33451	1.07919e-76	2.52346e-75
ENSG00000163527.10	STT3B	201.321	7.14905	1.1287e-76	2.6373e-75
ENSG00000072736.19	NFATC3	176.084	7.10369	1.2598e-76	2.94145e-75
ENSG00000119280.17	C1orf198	172.153	6.72422	1.34622e-76	3.14091e-75
ENSG00000160216.21	AGPAT3	139.526	5.79815	1.39244e-76	3.24637e-75
ENSG00000148737.17	TCF7L2	139.108	6.14108	1.51371e-76	3.52651e-75
ENSG00000178385.15	PLEKHM3	165.224	6.93312	1.57436e-76	3.6651e-75
ENSG00000149308.17	NPAT	287	8.24904	1.62815e-76	3.78755e-75
ENSG00000257315.3	ZBED6	219.008	7.49969	1.92608e-76	4.47732e-75
ENSG00000129116.19	PALLD	181.846	7.07153	2.06076e-76	4.7869e-75
ENSG00000122545.21	SEPTIN7	183.836	7.16145	2.18641e-76	5.07504e-75
ENSG00000205208.5	C4orf46	204.43	7.65592	2.42066e-76	5.61467e-75
ENSG00000198663.17	C6orf89	149.491	6.41007	2.49135e-76	5.77439e-75
ENSG00000135829.17	DHX9	177.275	6.08071	2.50401e-76	5.79949e-75
ENSG00000111011.18	RSRC2	201.641	6.59221	3.24295e-76	7.50545e-75
ENSG00000135655.16	USP15	149.434	5.93483	3.41568e-76	7.89944e-75
ENSG00000153914.16	SREK1	175.96	6.30471	3.58801e-76	8.29195e-75
ENSG00000186575.19	NF2	168.678	5.95396	3.61018e-76	8.3371e-75
ENSG00000189060.6	H1-0	212.737	7.53236	3.88412e-76	8.96318e-75
ENSG00000183864.5	TOB2	168.497	6.89432	4.22134e-76	9.73428e-75
ENSG00000187325.5	TAF9B	176.318	6.95357	4.3402e-76	1.00011e-74
ENSG00000101557.15	USP14	200.673	7.45279	4.41803e-76	1.0173e-74
ENSG00000198743.7	SLC5A3	186.567	7.25901	4.53225e-76	1.04285e-74
ENSG00000175727.14	MLXIP	140.614	6.43496	5.39551e-76	1.24058e-74
ENSG00000069956.14	MAPK6	189.6	7.20825	6.77393e-76	1.55638e-74
ENSG00000137145.21	DENND4C	180.706	6.68161	6.88915e-76	1.58171e-74
ENSG00000101558.14	VAPA	197.049	7.42442	6.97654e-76	1.60061e-74
ENSG00000150776.18	NKAPD1	170.929	6.98423	7.1659e-76	1.64287e-74
ENSG00000035141.8	FAM136A	156.353	6.53675	7.51668e-76	1.72204e-74
ENSG00000107669.19	ATE1	152.756	6.13874	8.06018e-76	1.84522e-74
ENSG00000156650.14	KAT6B	133.131	5.62127	8.6355e-76	1.9755e-74
ENSG00000148672.10	GLUD1	171.795	6.50593	9.24829e-76	2.11416e-74
ENSG00000142599.19	RERE	153.284	6.68384	9.36148e-76	2.13849e-74
ENSG00000001167.15	NFYA	192.968	7.30739	1.00562e-75	2.29553e-74
ENSG00000139618.17	BRCA2	185.284	6.83931	1.088e-75	2.48181e-74
ENSG00000005100.13	DHX33	181.939	6.70499	1.11698e-75	2.54607e-74
ENSG00000103064.15	SLC7A6	140.576	6.16396	1.12703e-75	2.56712e-74
ENSG00000118873.17	RAB3GAP2	159.611	6.25146	1.15019e-75	2.61799e-74
ENSG00000153207.16	AHCTF1	161.561	6.64177	1.30962e-75	2.97875e-74
ENSG00000144231.11	POLR2D	220.363	7.49994	1.40782e-75	3.19982e-74
ENSG00000101935.12	AMMECR1	167.037	6.94824	1.47911e-75	3.35945e-74
ENSG00000178295.15	GEN1	164.258	6.3993	1.53066e-75	3.47402e-74
ENSG00000116641.18	DOCK7	150.431	5.50442	1.6113e-75	3.65443e-74
ENSG00000029993.15	HMGB3	162.691	6.77546	1.64175e-75	3.72084e-74
ENSG00000124209.4	RAB22A	189.899	7.28557	1.71045e-75	3.87375e-74
ENSG00000175595.16	ERCC4	144.722	6.10533	1.89116e-75	4.27996e-74
ENSG00000171488.15	LRRC8C	159.475	6.40457	1.92438e-75	4.35205e-74
ENSG00000116406.20	EDEM3	164.7	6.25698	2.00985e-75	4.54209e-74
ENSG00000100219.17	XBP1	201.384	7.22836	2.02522e-75	4.57356e-74
ENSG00000168488.19	ATXN2L	150.705	6.35848	2.22481e-75	5.02071e-74
ENSG00000264522.6	OTUD7B	147.976	5.85334	2.25394e-75	5.08284e-74
ENSG00000073921.18	PICALM	177.324	6.96499	2.30628e-75	5.19717e-74
ENSG00000138398.17	PPIG	183.188	6.60012	2.34544e-75	5.28165e-74
ENSG00000133318.14	RTN3	189.842	7.29167	2.38413e-75	5.36497e-74
ENSG00000124226.11	RNF114	174.33	7.08672	2.41281e-75	5.42565e-74
ENSG00000182504.11	CEP97	190.637	6.81677	2.73897e-75	6.15472e-74
ENSG00000168769.14	TET2	193.115	7.23057	2.81385e-75	6.3185e-74
ENSG00000066739.12	ATG2B	151.027	6.42623	2.91109e-75	6.53222e-74
ENSG00000109572.15	CLCN3	191.824	7.47057	3.06119e-75	6.86417e-74
ENSG00000122591.13	FAM126A	166.778	6.36211	3.58639e-75	8.03614e-74
ENSG00000077157.22	PPP1R12B	129.236	5.50458	3.70023e-75	8.28539e-74
ENSG00000124782.21	RREB1	172.435	6.26965	3.74061e-75	8.36989e-74
ENSG00000163904.13	SENP2	163.484	6.99228	3.88969e-75	8.69732e-74
ENSG00000107957.17	SH3PXD2A	140.054	5.20817	3.89529e-75	8.7037e-74
ENSG00000189308.11	LIN54	192.633	7.30722	4.12351e-75	9.20714e-74
ENSG00000107185.10	RGP1	148.593	6.70975	4.15989e-75	9.28184e-74
ENSG00000118007.13	STAG1	136.169	6.06769	4.35423e-75	9.70862e-74
ENSG00000180198.17	RCC1	140.544	6.01997	4.51047e-75	1.00499e-73
ENSG00000157657.15	ZNF618	153.812	6.56166	4.71399e-75	1.0496e-73
ENSG00000070087.15	PFN2	240.366	8.09435	6.4305e-75	1.43079e-73
ENSG00000160007.19	ARHGAP35	164.917	6.67157	6.67186e-75	1.48345e-73
ENSG00000110696.10	C11orf58	176.539	6.65192	7.31871e-75	1.62613e-73
ENSG00000157625.16	TAB3	181.937	6.86946	7.7256e-75	1.71533e-73
ENSG00000137073.24	UBAP2	160.388	6.62905	8.09186e-75	1.7954e-73
ENSG00000057252.13	SOAT1	141.682	6.33116	8.32439e-75	1.8457e-73
ENSG00000122958.15	VPS26A	189.116	6.65928	8.90164e-75	1.9723e-73
ENSG00000112406.5	HECA	225.681	7.90025	9.68859e-75	2.14517e-73
ENSG00000273149.1	ENSG00000273149	157.125	5.90082	1.018e-74	2.2524e-73
ENSG00000135913.11	USP37	239.211	7.88433	1.10906e-74	2.45216e-73
ENSG00000136709.12	WDR33	131.979	5.61111	1.17183e-74	2.58914e-73
ENSG00000105176.18	URI1	158.017	6.33385	1.23123e-74	2.71849e-73
ENSG00000079387.14	SENP1	232.879	7.9435	1.26064e-74	2.78148e-73
ENSG00000263809.1	ENSG00000263809	138.403	5.7093	1.39834e-74	3.08316e-73
ENSG00000197756.10	RPL37A	153.132	4.75878	1.50236e-74	3.31021e-73
ENSG00000164985.15	PSIP1	169.035	6.89877	1.55348e-74	3.42046e-73
ENSG00000163430.12	FSTL1	153.187	6.75504	1.59064e-74	3.49984e-73
ENSG00000261115.7	TMEM178B	129.398	5.90057	1.72895e-74	3.80154e-73
ENSG00000146963.18	LUC7L2	152.649	6.14153	1.75151e-74	3.84846e-73
ENSG00000070018.9	LRP6	169.864	6.58889	1.76736e-74	3.8806e-73
ENSG00000164327.13	RICTOR	184.631	6.95759	1.84014e-74	4.0376e-73
ENSG00000053770.12	AP5M1	174.231	6.9372	1.88182e-74	4.12619e-73
ENSG00000281649.3	EBLN3P	181.632	7.2216	2.21232e-74	4.84752e-73
ENSG00000107560.12	RAB11FIP2	216.246	7.83852	2.60645e-74	5.70717e-73
ENSG00000131873.7	CHSY1	189.987	7.36902	2.6731e-74	5.84906e-73
ENSG00000204899.6	MZT1	219.5	7.57696	2.97178e-74	6.49813e-73
ENSG00000109920.13	FNBP4	159.942	6.26023	3.00992e-74	6.577e-73
ENSG00000100596.8	SPTLC2	173.318	6.92834	3.33062e-74	7.27273e-73
ENSG00000108854.16	SMURF2	189.785	7.28641	3.68135e-74	8.03305e-73
ENSG00000196428.13	TSC22D2	206.475	7.49709	3.97075e-74	8.65858e-73
ENSG00000175215.11	CTDSP2	198.178	7.42438	4.04441e-74	8.81314e-73
ENSG00000224531.6	SMIM13	250.194	8.05252	4.61504e-74	1.00497e-72
ENSG00000126883.19	NUP214	142.438	6.1369	4.63264e-74	1.00811e-72
ENSG00000176853.16	FAM91A1	204.357	7.47299	4.77154e-74	1.03762e-72
ENSG00000180370.10	PAK2	200.627	7.62832	4.79312e-74	1.0416e-72
ENSG00000169139.12	UBE2V2	213.236	7.62577	4.87431e-74	1.05852e-72
ENSG00000104341.17	LAPTM4B	168.594	6.95617	4.97867e-74	1.08044e-72
ENSG00000168710.18	AHCYL1	155.831	6.03465	4.99016e-74	1.08219e-72
ENSG00000131844.17	MCCC2	137.498	6.08011	5.39036e-74	1.16818e-72
ENSG00000138668.19	HNRNPD	147.644	5.38702	5.81629e-74	1.25963e-72
ENSG00000156261.13	CCT8	141.491	6.445	6.33838e-74	1.37176e-72
ENSG00000162775.17	RBM15	206.542	7.49131	6.49971e-74	1.40571e-72
ENSG00000055130.18	CUL1	162.721	6.43495	6.55182e-74	1.41601e-72
ENSG00000137337.16	MDC1	148.713	6.34626	6.9261e-74	1.49589e-72
ENSG00000113282.14	CLINT1	178.016	7.03732	7.07915e-74	1.5279e-72
ENSG00000176407.18	KCMF1	158.69	6.55015	7.80036e-74	1.68241e-72
ENSG00000198862.14	LTN1	165.621	6.45263	8.35956e-74	1.8018e-72
ENSG00000105849.6	POLR1F	210.541	7.60704	8.59086e-74	1.85039e-72
ENSG00000113384.14	GOLPH3	233.99	7.84931	8.89711e-74	1.91505e-72
ENSG00000106771.13	TMEM245	200.137	7.44844	9.20264e-74	1.97947e-72
ENSG00000156853.13	ZNF689	157.781	6.79888	9.28021e-74	1.9948e-72
ENSG00000139737.22	SLAIN1	187.803	7.11849	9.39472e-74	2.01805e-72
ENSG00000175073.8	VCPIP1	204.117	7.38868	1.04204e-73	2.23686e-72
ENSG00000068654.17	POLR1A	130.912	5.83188	1.11126e-73	2.38384e-72
ENSG00000259956.2	RBM15B	155.219	6.70594	1.14471e-73	2.45392e-72
ENSG00000178163.8	ZNF518B	191.192	7.29963	1.15015e-73	2.46392e-72
ENSG00000198301.12	SDAD1	169.49	7.04263	1.20694e-73	2.58383e-72
ENSG00000058673.17	ZC3H11A	219.008	7.66654	1.28492e-73	2.74891e-72
ENSG00000115084.15	SLC35F5	157.998	6.60727	1.49535e-73	3.19694e-72
ENSG00000270800.3	RPS10-NUDT3	124.275	5.63545	1.57904e-73	3.37358e-72
ENSG00000168672.4	LRATD2	222.836	7.87685	1.58779e-73	3.39e-72
ENSG00000101868.13	POLA1	138.588	5.71912	1.78674e-73	3.81219e-72
ENSG00000165185.15	KIAA1958	157.747	6.86895	1.81206e-73	3.86361e-72
ENSG00000205937.12	RNPS1	183.131	6.74994	1.86357e-73	3.97078e-72
ENSG00000197299.13	BLM	180.807	6.86606	2.53282e-73	5.39314e-72
ENSG00000125630.16	POLR1B	186.247	7.26671	2.56948e-73	5.46752e-72
ENSG00000122778.10	KIAA1549	126.661	6.06289	2.90934e-73	6.18653e-72
ENSG00000179889.20	PDXDC1	142.412	6.1315	3.4995e-73	7.43649e-72
ENSG00000105220.17	GPI	159.043	5.94522	3.54921e-73	7.53708e-72
ENSG00000178202.13	POGLUT3	208.52	7.3396	3.71628e-73	7.88657e-72
ENSG00000065243.20	PKN2	238.744	7.88217	3.733e-73	7.91675e-72
ENSG00000100796.18	PPP4R3A	206.298	7.33991	3.80017e-73	8.05381e-72
ENSG00000119812.20	FAM98A	136.316	6.16859	4.11097e-73	8.70668e-72
ENSG00000152767.17	FARP1	140.321	4.90785	4.17604e-73	8.83858e-72
ENSG00000122786.20	CALD1	157.476	6.23078	4.29811e-73	9.09088e-72
ENSG00000069248.12	NUP133	151.1	6.53483	4.31461e-73	9.11969e-72
ENSG00000122779.18	TRIM24	167.773	6.41921	4.37177e-73	9.23433e-72
ENSG00000197753.11	LHFPL5	146.3	6.68257	4.59764e-73	9.70498e-72
ENSG00000143947.15	RPS27A	163.28	6.1558	4.94339e-73	1.04278e-71
ENSG00000103404.15	USP31	142.13	6.33459	5.10911e-73	1.07703e-71
ENSG00000123200.17	ZC3H13	164.946	4.8306	6.28519e-73	1.32407e-71
ENSG00000162520.15	SYNC	199.15	7.61854	6.31395e-73	1.32924e-71
ENSG00000066279.19	ASPM	161.549	6.52957	6.4972e-73	1.36692e-71
ENSG00000157985.19	AGAP1	142.492	6.00544	6.72156e-73	1.41318e-71
ENSG00000144711.16	IQSEC1	145.4	6.54506	7.41071e-73	1.55703e-71
ENSG00000170275.15	CRTAP	122.889	5.54539	8.90476e-73	1.86971e-71
ENSG00000064419.14	TNPO3	154.212	6.35106	9.8899e-73	2.07518e-71
ENSG00000173166.18	RAPH1	167.445	7.10796	1.02529e-72	2.14992e-71
ENSG00000186063.13	AIDA	155.627	6.7073	1.10902e-72	2.32394e-71
ENSG00000174953.14	DHX36	176.345	6.77357	1.23599e-72	2.5883e-71
ENSG00000110955.9	ATP5F1B	128.554	5.76477	1.36542e-72	2.85747e-71
ENSG00000122026.11	RPL21	129.896	5.32278	1.42435e-72	2.97881e-71
ENSG00000125676.20	THOC2	169.625	6.34746	1.43631e-72	3.00184e-71
ENSG00000093183.14	SEC22C	155.349	6.64496	1.62177e-72	3.38722e-71
ENSG00000183475.13	ASB7	150.688	6.80147	1.66872e-72	3.483e-71
ENSG00000127483.19	HP1BP3	179.213	6.91729	1.70909e-72	3.5649e-71
ENSG00000138078.16	PREPL	161.948	6.64399	1.83686e-72	3.82875e-71
ENSG00000117868.18	ESYT2	149.792	6.65462	1.83801e-72	3.82875e-71
ENSG00000105835.13	NAMPT	172.946	6.93071	1.86274e-72	3.87774e-71
ENSG00000047849.22	MAP4	128.586	4.96268	2.31747e-72	4.82119e-71
ENSG00000162437.15	RAVER2	186.617	7.34685	2.43985e-72	5.07245e-71
ENSG00000272391.6	POM121C	172.035	6.54808	2.51472e-72	5.22468e-71
ENSG00000073614.13	KDM5A	157.293	6.24107	2.67316e-72	5.55023e-71
ENSG00000176105.14	YES1	163.503	6.84817	2.82676e-72	5.8653e-71
ENSG00000134419.15	RPS15A	124.751	5.52443	2.95031e-72	6.11764e-71
ENSG00000079819.19	EPB41L2	142.488	6.18544	2.98195e-72	6.1792e-71
ENSG00000128881.18	TTBK2	173.034	7.00052	3.22289e-72	6.67413e-71
ENSG00000022840.17	RNF10	158.454	6.55117	3.43802e-72	7.11498e-71
ENSG00000136021.19	SCYL2	219.391	7.86057	3.90709e-72	8.08044e-71
ENSG00000102781.14	KATNAL1	161.694	7.13564	3.91592e-72	8.09341e-71
ENSG00000174579.4	MSL2	195.044	7.40835	5.62669e-72	1.16217e-70
ENSG00000108587.16	GOSR1	165.356	7.16712	5.64258e-72	1.16469e-70
ENSG00000030066.14	NUP160	155.602	6.52708	6.3798e-72	1.316e-70
ENSG00000077721.17	UBE2A	156.338	6.71809	6.65727e-72	1.37234e-70
ENSG00000163807.6	KIAA1143	230.233	8.14518	6.78295e-72	1.39734e-70
ENSG00000152242.11	C18orf25	222.938	7.98687	7.0817e-72	1.45712e-70
ENSG00000146918.20	NCAPG2	160.846	6.36239	7.08235e-72	1.45712e-70
ENSG00000162368.14	CMPK1	175.975	7.17788	7.10204e-72	1.46023e-70
ENSG00000117632.23	STMN1	156.361	6.78579	7.35561e-72	1.51138e-70
ENSG00000072041.18	SLC6A15	155.284	6.64336	7.89474e-72	1.62111e-70
ENSG00000179818.16	PCBP1-AS1	131.343	5.28019	8.71244e-72	1.78785e-70
ENSG00000188554.15	NBR1	136.899	5.89704	8.92609e-72	1.83051e-70
ENSG00000064313.13	TAF2	147.798	6.23955	9.03052e-72	1.85073e-70
ENSG00000107679.15	PLEKHA1	164.389	7.0801	9.49798e-72	1.94528e-70
ENSG00000086102.19	NFX1	153.029	6.69191	9.77112e-72	1.99992e-70
ENSG00000140391.15	TSPAN3	151.832	6.00426	9.79177e-72	2.00286e-70
ENSG00000159592.11	GPBP1L1	179.896	7.2894	1.27934e-71	2.61514e-70
ENSG00000170871.12	KIAA0232	190.328	7.37566	1.28552e-71	2.62608e-70
ENSG00000131508.16	UBE2D2	193.273	7.48477	1.30402e-71	2.66216e-70
ENSG00000050748.18	MAPK9	144.335	6.30664	1.37091e-71	2.79691e-70
ENSG00000134970.14	TMED7	238.693	7.79058	1.4832e-71	3.02405e-70
ENSG00000166164.16	BRD7	158.497	6.38546	1.50664e-71	3.06987e-70
ENSG00000023734.11	STRAP	154.317	6.83257	1.55122e-71	3.15867e-70
ENSG00000136937.13	NCBP1	151.023	6.54584	1.61723e-71	3.29097e-70
ENSG00000135720.13	DYNC1LI2	181.821	7.22687	1.72518e-71	3.50838e-70
ENSG00000166450.13	PRTG	170.152	7.12678	1.83532e-71	3.72998e-70
ENSG00000169398.20	PTK2	152.417	5.79198	1.8422e-71	3.74156e-70
ENSG00000075711.21	DLG1	129.337	5.72963	1.99991e-71	4.05926e-70
ENSG00000171988.20	JMJD1C	169.517	6.59142	2.10426e-71	4.26834e-70
ENSG00000163444.12	TMEM183A	125.973	6.00575	2.34104e-71	4.74558e-70
ENSG00000077097.16	TOP2B	158.225	6.19541	2.45553e-71	4.97448e-70
ENSG00000096060.15	FKBP5	142.423	6.64791	2.7434e-71	5.55412e-70
ENSG00000141646.15	SMAD4	157.512	6.73187	2.82901e-71	5.72378e-70
ENSG00000118454.13	ANKRD13C	171.888	6.78922	2.86664e-71	5.7962e-70
ENSG00000014919.13	COX15	177.887	7.36408	2.95699e-71	5.97508e-70
ENSG00000143933.20	CALM2	153.869	6.24521	3.04187e-71	6.14268e-70
ENSG00000132313.15	MRPL35	156.176	6.92738	3.10003e-71	6.25615e-70
ENSG00000102144.15	PGK1	133.304	6.03679	3.26695e-71	6.5888e-70
ENSG00000144566.11	RAB5A	217.999	7.66834	3.35586e-71	6.76381e-70
ENSG00000173848.19	NET1	236.512	4.38794	3.44909e-71	6.9473e-70
ENSG00000170802.17	FOXN2	215.758	7.9401	3.55289e-71	7.15182e-70
ENSG00000144283.23	PKP4	137.549	6.40126	3.91662e-71	7.879e-70
ENSG00000067208.16	EVI5	167.167	7.01991	3.97999e-71	8.00139e-70
ENSG00000066933.16	MYO9A	158.841	5.49477	4.61076e-71	9.26361e-70
ENSG00000127603.32	MACF1	148.067	4.52743	4.82641e-71	9.69075e-70
ENSG00000096070.19	BRPF3	139.692	6.31262	5.61574e-71	1.12685e-69
ENSG00000130816.17	DNMT1	132.545	5.3247	5.86484e-71	1.17609e-69
ENSG00000082213.18	C5orf22	175.413	7.43327	6.2999e-71	1.26253e-69
ENSG00000112339.15	HBS1L	204.788	6.65442	6.72238e-71	1.34635e-69
ENSG00000134874.18	DZIP1	168.943	6.65502	7.5193e-71	1.505e-69
ENSG00000099246.18	RAB18	180.601	7.05799	7.66034e-71	1.53135e-69
ENSG00000095015.6	MAP3K1	162.714	7.14417	7.66062e-71	1.53135e-69
ENSG00000185219.18	ZNF445	146.645	6.08738	7.67862e-71	1.53398e-69
ENSG00000140382.15	HMG20A	189.57	7.64652	7.87969e-71	1.57316e-69
ENSG00000080822.17	CLDND1	167.979	7.2754	8.92142e-71	1.78001e-69
ENSG00000204186.10	ZDBF2	185.418	7.51731	9.04278e-71	1.80309e-69
ENSG00000070961.16	ATP2B1	141.63	6.33945	9.2448e-71	1.84221e-69
ENSG00000071082.11	RPL31	136.573	5.45675	9.50145e-71	1.89217e-69
ENSG00000101138.12	CSTF1	179.667	7.29029	1.08962e-70	2.16857e-69
ENSG00000114982.19	KANSL3	146.39	6.62135	1.13778e-70	2.26299e-69
ENSG00000054965.11	FAM168A	189.167	7.64248	1.14677e-70	2.27945e-69
ENSG00000162434.13	JAK1	131.962	5.84331	1.18938e-70	2.36266e-69
ENSG00000112319.20	EYA4	136.981	6.08097	1.25079e-70	2.48309e-69
ENSG00000153879.9	CEBPG	211.025	7.80626	1.38499e-70	2.74778e-69
ENSG00000151233.11	GXYLT1	167.298	6.95429	1.40238e-70	2.78053e-69
ENSG00000143493.13	INTS7	172.788	7.14634	1.52295e-70	3.01771e-69
ENSG00000028203.19	VEZT	171.078	7.05994	1.75302e-70	3.47142e-69
ENSG00000198961.10	PJA2	196.662	7.59658	1.97108e-70	3.9008e-69
ENSG00000143033.18	MTF2	181.388	7.2149	2.04798e-70	4.05045e-69
ENSG00000136628.18	EPRS1	153.62	6.4541	2.08633e-70	4.12373e-69
ENSG00000115839.19	RAB3GAP1	139.114	5.91538	2.09609e-70	4.14044e-69
ENSG00000156299.14	TIAM1	152.893	6.50219	2.10359e-70	4.15265e-69
ENSG00000117724.14	CENPF	146.811	5.7986	2.15218e-70	4.24593e-69
ENSG00000152061.24	RABGAP1L	128.222	5.98157	2.16316e-70	4.26493e-69
ENSG00000111897.7	SERINC1	174.307	6.81589	2.21705e-70	4.36847e-69
ENSG00000136111.14	TBC1D4	148.34	6.3407	2.64637e-70	5.21115e-69
ENSG00000072274.13	TFRC	131.8	6.22788	2.89304e-70	5.69337e-69
ENSG00000063601.17	MTMR1	155.122	6.99562	3.4466e-70	6.77852e-69
ENSG00000137693.14	YAP1	158.351	6.87579	3.59449e-70	7.065e-69
ENSG00000146872.19	TLK2	174.374	6.58876	4.12173e-70	8.09627e-69
ENSG00000099968.18	BCL2L13	144.289	6.66957	4.26059e-70	8.36384e-69
ENSG00000115484.15	CCT4	140.835	5.90804	4.33911e-70	8.51271e-69
ENSG00000110987.9	BCL7A	158.661	6.94767	4.35459e-70	8.5378e-69
ENSG00000138439.12	FAM117B	147.33	6.76904	4.80071e-70	9.40667e-69
ENSG00000162735.19	PEX19	147.436	6.91776	4.82098e-70	9.44054e-69
ENSG00000126070.20	AGO3	137.591	6.40479	5.02437e-70	9.83274e-69
ENSG00000155111.15	CDK19	132.334	6.53877	5.52244e-70	1.08008e-68
ENSG00000171466.10	ZNF562	142.341	6.71914	5.5764e-70	1.08996e-68
ENSG00000069345.12	DNAJA2	130.277	6.45413	5.79774e-70	1.13253e-68
ENSG00000198408.14	OGA	161.45	6.97531	5.84531e-70	1.14111e-68
ENSG00000128607.14	KLHDC10	223.6	7.9944	6.05372e-70	1.18107e-68
ENSG00000114346.14	ECT2	161.095	6.90188	6.08803e-70	1.18704e-68
ENSG00000116030.17	SUMO1	167.784	6.64747	6.09325e-70	1.18732e-68
ENSG00000165660.8	ABRAXAS2	199.748	7.71927	6.47162e-70	1.26028e-68
ENSG00000198879.13	SFMBT2	194.348	7.67883	7.51831e-70	1.46321e-68
ENSG00000184992.13	BRI3BP	187.299	7.63061	7.58818e-70	1.4759e-68
ENSG00000198824.7	CHAMP1	202.299	7.85178	8.23087e-70	1.59992e-68
ENSG00000164151.12	ICE1	202.169	7.64151	8.49964e-70	1.65115e-68
ENSG00000126778.12	SIX1	141.935	6.6416	8.80139e-70	1.70872e-68
ENSG00000182628.13	SKA2	201.123	7.7343	9.19609e-70	1.78426e-68
ENSG00000188994.13	ZNF292	182.343	7.07165	9.29953e-70	1.80322e-68
ENSG00000122692.9	SMU1	130.3	6.21157	9.85981e-70	1.91069e-68
ENSG00000103365.15	GGA2	162.375	7.0632	1.00551e-69	1.94735e-68
ENSG00000136758.20	YME1L1	178.935	7.047	1.03706e-69	2.00722e-68
ENSG00000156011.18	PSD3	154.159	6.69905	1.14837e-69	2.2213e-68
ENSG00000135862.6	LAMC1	135.778	6.27159	1.20899e-69	2.33713e-68
ENSG00000108671.11	PSMD11	136.215	6.51649	1.36666e-69	2.64032e-68
ENSG00000095951.17	HIVEP1	148.248	6.70341	1.40935e-69	2.72113e-68
ENSG00000151239.14	TWF1	205.057	7.75393	1.49441e-69	2.8836e-68
ENSG00000136636.13	KCTD3	191.67	7.47608	1.6498e-69	3.18151e-68
ENSG00000084234.18	APLP2	120.91	5.98912	1.74462e-69	3.36231e-68
ENSG00000145012.14	LPP	149.154	6.85788	1.74837e-69	3.3675e-68
ENSG00000107862.7	GBF1	150.221	5.65994	1.74946e-69	3.36756e-68
ENSG00000006432.16	MAP3K9	122.426	6.0136	1.78863e-69	3.44086e-68
ENSG00000289694.1	ENSG00000289694	167.563	7.19113	1.88529e-69	3.62462e-68
ENSG00000196227.11	FAM217B	187.635	7.63052	1.9027e-69	3.65586e-68
ENSG00000265241.8	RBM8A	129.029	6.14243	2.02041e-69	3.87967e-68
ENSG00000173218.15	VANGL1	125.514	6.47004	2.23209e-69	4.28356e-68
ENSG00000187240.17	DYNC2H1	134.312	6.43425	2.38593e-69	4.57602e-68
ENSG00000156508.19	EEF1A1	3314.42	2.82871	2.52054e-69	4.83126e-68
ENSG00000173273.16	TNKS	185.776	7.61563	2.52582e-69	4.83846e-68
ENSG00000138160.7	KIF11	186.786	7.52611	2.56492e-69	4.91038e-68
ENSG00000163399.16	ATP1A1	133.765	5.69578	2.57502e-69	4.92675e-68
ENSG00000204388.7	HSPA1B	159.029	6.61353	2.97535e-69	5.68925e-68
ENSG00000171475.14	WIPF2	152.455	6.8909	2.98095e-69	5.69652e-68
ENSG00000107779.14	BMPR1A	175.548	7.25707	3.06978e-69	5.86274e-68
ENSG00000159399.10	HK2	150.221	6.86989	3.21243e-69	6.13149e-68
ENSG00000102910.14	LONP2	179.713	7.57501	3.3484e-69	6.38715e-68
ENSG00000108175.19	ZMIZ1	139.936	6.76927	3.61418e-69	6.89e-68
ENSG00000117222.14	RBBP5	168.844	7.19508	3.67022e-69	6.99262e-68
ENSG00000052795.13	FNIP2	145.166	6.67559	3.88416e-69	7.39578e-68
ENSG00000010072.16	SPRTN	161.113	6.97618	4.08554e-69	7.77455e-68
ENSG00000163539.18	CLASP2	154.84	6.25769	4.32045e-69	8.21663e-68
ENSG00000117758.14	STX12	184.198	7.50898	4.37445e-69	8.31434e-68
ENSG00000159082.18	SYNJ1	152.8	6.89616	4.43528e-69	8.4249e-68
ENSG00000158691.15	ZSCAN12	132.976	6.24704	4.65409e-69	8.83525e-68
ENSG00000108848.16	LUC7L3	142.991	5.80249	4.72028e-69	8.95552e-68
ENSG00000166263.13	STXBP4	148.385	6.77881	5.19031e-69	9.8414e-68
ENSG00000039560.14	RAI14	137.519	6.59038	5.83748e-69	1.10572e-67
ENSG00000100207.21	TCF20	132.082	6.53777	5.83852e-69	1.10572e-67
ENSG00000162734.13	PEA15	122.083	5.85756	6.27817e-69	1.18828e-67
ENSG00000272325.2	NUDT3	150.101	7.11499	6.81749e-69	1.28958e-67
ENSG00000115091.12	ACTR3	165.556	6.74351	6.84491e-69	1.294e-67
ENSG00000116679.16	IVNS1ABP	174.963	6.75238	7.56433e-69	1.42915e-67
ENSG00000163629.13	PTPN13	153.471	6.14979	8.10653e-69	1.53068e-67
ENSG00000163558.13	PRKCI	164.66	7.3429	8.32495e-69	1.57098e-67
ENSG00000165891.16	E2F7	191.014	7.76647	8.54913e-69	1.61233e-67
ENSG00000204842.18	ATXN2	147.257	6.28541	8.67517e-69	1.63512e-67
ENSG00000269968.1	ENSG00000269968	103.742	5.41404	9.4872e-69	1.78711e-67
ENSG00000164024.12	METAP1	141.024	6.77923	9.58345e-69	1.80417e-67
ENSG00000112739.17	PRPF4B	162.512	6.71694	9.62044e-69	1.81006e-67
ENSG00000051341.15	POLQ	147.583	6.50298	9.79795e-69	1.84236e-67
ENSG00000183814.16	LIN9	155.751	6.71605	1.08735e-68	2.04339e-67
ENSG00000113742.14	CPEB4	158.28	6.55331	1.10085e-68	2.06753e-67
ENSG00000152683.14	SLC30A6	143.081	6.79896	1.26307e-68	2.37079e-67
ENSG00000114742.14	WDR48	144.739	6.73547	1.29837e-68	2.43561e-67
ENSG00000088325.16	TPX2	142.562	6.14708	1.34969e-68	2.5304e-67
ENSG00000059728.11	MXD1	151.656	6.88494	1.42235e-68	2.66504e-67
ENSG00000125977.7	EIF2S2	142.56	6.46004	1.45354e-68	2.72187e-67
ENSG00000143479.18	DYRK3	139.423	6.47916	1.48267e-68	2.77477e-67
ENSG00000181222.19	POLR2A	124.928	5.98915	1.5412e-68	2.88261e-67
ENSG00000205726.15	ITSN1	111.995	5.13943	1.54526e-68	2.8885e-67
ENSG00000223496.3	EXOSC6	166.28	7.35568	1.60644e-68	3.00109e-67
ENSG00000122068.13	FYTTD1	162.99	7.15527	1.61156e-68	3.00887e-67
ENSG00000278540.5	ACACA	129.574	5.814	1.71576e-68	3.20154e-67
ENSG00000130803.15	ZNF317	172.677	7.32004	1.72797e-68	3.22243e-67
ENSG00000117597.18	UTP25	149.125	6.35817	1.79824e-68	3.3515e-67
ENSG00000100813.15	ACIN1	133.317	5.41462	1.92844e-68	3.59205e-67
ENSG00000081377.17	CDC14B	168.308	7.28534	1.98708e-68	3.6991e-67
ENSG00000103257.9	SLC7A5	128.686	6.30807	2.14784e-68	3.99601e-67
ENSG00000068489.13	PRR11	124.031	6.4476	2.15593e-68	4.00871e-67
ENSG00000058262.10	SEC61A1	157.743	7.18966	2.4095e-68	4.47757e-67
ENSG00000205531.13	NAP1L4	137.019	6.52285	2.53339e-68	4.70503e-67
ENSG00000135341.18	MAP3K7	171.656	6.98866	2.64344e-68	4.90655e-67
ENSG00000111328.7	CDK2AP1	127.145	6.41288	2.82655e-68	5.24335e-67
ENSG00000206560.12	ANKRD28	145.633	6.2579	3.20355e-68	5.93922e-67
ENSG00000138760.11	SCARB2	138.737	6.09613	3.34534e-68	6.19847e-67
ENSG00000116128.12	BCL9	142.025	6.86646	3.49724e-68	6.47612e-67
ENSG00000163754.18	GYG1	138.155	6.67082	3.51246e-68	6.50051e-67
ENSG00000148303.17	RPL7A	144.791	4.59967	3.7408e-68	6.91905e-67
ENSG00000141580.16	WDR45B	164.633	7.16439	3.88309e-68	7.17805e-67
ENSG00000121741.17	ZMYM2	146.672	6.56768	3.89763e-68	7.20074e-67
ENSG00000121481.11	RNF2	176.507	7.01747	4.03843e-68	7.4565e-67
ENSG00000150712.11	MTMR12	147.463	6.91885	4.06004e-68	7.49204e-67
ENSG00000149554.14	CHEK1	162.083	7.22742	4.41689e-68	8.14579e-67
ENSG00000181026.15	AEN	144.171	6.66731	4.45358e-68	8.20867e-67
ENSG00000081026.19	MAGI3	127.862	6.0293	4.67546e-68	8.61264e-67
ENSG00000144233.11	AMMECR1L	157.297	7.09365	4.77767e-68	8.7958e-67
ENSG00000092439.16	TRPM7	130.645	6.26892	4.99404e-68	9.18881e-67
ENSG00000137575.12	SDCBP	175.866	7.53383	5.14158e-68	9.45478e-67
ENSG00000154813.10	DPH3	147.308	6.84367	5.51199e-68	1.013e-66
ENSG00000140022.14	STON2	156.086	7.00507	5.6338e-68	1.03479e-66
ENSG00000177889.10	UBE2N	156.578	7.01192	5.72374e-68	1.0507e-66
ENSG00000066117.15	SMARCD1	145.702	6.98459	5.7668e-68	1.05799e-66
ENSG00000113719.17	ERGIC1	97.7239	5.21217	5.77468e-68	1.05882e-66
ENSG00000154124.5	OTULIN	141.979	6.64973	5.91097e-68	1.08319e-66
ENSG00000167721.11	TSR1	152.855	6.68088	6.04872e-68	1.10779e-66
ENSG00000106070.20	GRB10	141.537	6.56901	6.67287e-68	1.22139e-66
ENSG00000182952.5	HMGN4	180.182	7.57118	6.86049e-68	1.25501e-66
ENSG00000188786.10	MTF1	153.055	6.89832	6.97047e-68	1.27439e-66
ENSG00000010818.10	HIVEP2	131.592	6.33751	7.52195e-68	1.37443e-66
ENSG00000182934.12	SRPRA	147.663	7.08963	7.74563e-68	1.41448e-66
ENSG00000196177.13	ACADSB	131.276	6.67543	8.99352e-68	1.64142e-66
ENSG00000187607.16	ZNF286A	146.306	6.9129	9.40535e-68	1.7156e-66
ENSG00000179361.18	ARID3B	119.025	6.14435	9.47223e-68	1.7268e-66
ENSG00000135766.9	EGLN1	175.405	7.53341	1.0009e-67	1.82361e-66
ENSG00000025293.17	PHF20	154.576	6.9167	1.04216e-67	1.8977e-66
ENSG00000134709.13	HOOK1	150.793	6.73486	1.09171e-67	1.98677e-66
ENSG00000168566.13	SNRNP48	157.941	6.73738	1.12597e-67	2.04795e-66
ENSG00000166200.15	COPS2	174.926	7.17741	1.20017e-67	2.18165e-66
ENSG00000055483.20	USP36	109.094	5.56715	1.22493e-67	2.22538e-66
ENSG00000084112.15	SSH1	132.181	5.97731	1.24032e-67	2.25205e-66
ENSG00000153094.24	BCL2L11	146.11	6.60846	1.25374e-67	2.27512e-66
ENSG00000075420.13	FNDC3B	149.683	6.71905	1.49525e-67	2.71182e-66
ENSG00000157800.18	SLC37A3	146.74	6.3346	1.53542e-67	2.78307e-66
ENSG00000118496.5	FBXO30	151.74	6.73368	1.5896e-67	2.87964e-66
ENSG00000127314.18	RAP1B	128.516	6.36776	1.64783e-67	2.98341e-66
ENSG00000040199.18	PHLPP2	145.147	6.74255	1.66605e-67	3.01469e-66
ENSG00000116062.18	MSH6	146.637	6.28267	1.72962e-67	3.12793e-66
ENSG00000166402.9	TUB	149.619	6.94204	1.8403e-67	3.3262e-66
ENSG00000124831.19	LRRFIP1	106.195	5.44598	1.84282e-67	3.32885e-66
ENSG00000123094.16	RASSF8	149.31	7.1076	2.0686e-67	3.73456e-66
ENSG00000140534.14	TICRR	158.53	6.33535	2.24283e-67	4.04679e-66
ENSG00000108395.14	TRIM37	137.532	6.6673	2.28343e-67	4.11772e-66
ENSG00000133812.18	SBF2	109.411	5.48762	2.28596e-67	4.11993e-66
ENSG00000135052.16	GOLM1	138.782	6.6076	2.48595e-67	4.47781e-66
ENSG00000156017.13	CARNMT1	155.291	6.9975	2.56793e-67	4.62286e-66
ENSG00000115540.15	MOB4	165.392	7.09094	2.68243e-67	4.82623e-66
ENSG00000141441.16	GAREM1	132.063	6.07031	2.74741e-67	4.94036e-66
ENSG00000124177.16	CHD6	144.769	5.97951	3.09355e-67	5.55961e-66
ENSG00000087274.19	ADD1	120.274	5.84932	3.17444e-67	5.70175e-66
ENSG00000151576.10	QTRT2	145.782	6.82814	3.35806e-67	6.02814e-66
ENSG00000109805.10	NCAPG	166.187	7.17162	3.36151e-67	6.03093e-66
ENSG00000140450.9	ARRDC4	147.162	6.84035	3.97307e-67	7.1241e-66
ENSG00000141298.19	SSH2	158.898	7.38941	4.33361e-67	7.76618e-66
ENSG00000071794.16	HLTF	142.556	6.45865	4.57169e-67	8.1882e-66
ENSG00000143797.12	MBOAT2	160.038	7.20854	4.83609e-67	8.65687e-66
ENSG00000117000.9	RLF	258.564	8.45061	5.29446e-67	9.47204e-66
ENSG00000111596.14	CNOT2	140.873	5.94534	5.34576e-67	9.55842e-66
ENSG00000136874.11	STX17	134.806	6.79311	5.8095e-67	1.03817e-65
ENSG00000005893.16	LAMP2	134.686	6.8683	5.88008e-67	1.05019e-65
ENSG00000089157.16	RPLP0	127.487	4.28019	6.34539e-67	1.13266e-65
ENSG00000135999.12	EPC2	176.253	7.26615	6.41979e-67	1.1453e-65
ENSG00000033178.13	UBA6	196.378	7.80743	6.4882e-67	1.15685e-65
ENSG00000176994.11	SMCR8	146.662	6.99661	6.75603e-67	1.20393e-65
ENSG00000137713.16	PPP2R1B	169.267	7.48024	6.81121e-67	1.21308e-65
ENSG00000113387.12	SUB1	150.128	7.02942	6.91188e-67	1.23032e-65
ENSG00000165494.12	PCF11	119.384	6.13763	6.92571e-67	1.23208e-65
ENSG00000144320.14	LNPK	182.492	7.69587	7.60029e-67	1.35133e-65
ENSG00000155008.16	APOOL	132.845	6.61909	7.8053e-67	1.38701e-65
ENSG00000077514.9	POLD3	158.593	7.02484	8.28639e-67	1.47167e-65
ENSG00000182944.18	EWSR1	138.304	5.3045	8.40594e-67	1.49207e-65
ENSG00000120693.14	SMAD9	198.843	7.71855	8.52711e-67	1.51273e-65
ENSG00000179119.15	SPTY2D1	159.961	7.21231	9.04879e-67	1.60438e-65
ENSG00000136448.13	NMT1	120.859	6.00024	9.59964e-67	1.70109e-65
ENSG00000134313.17	KIDINS220	116.111	5.53587	9.93224e-67	1.75905e-65
ENSG00000143799.14	PARP1	160.535	4.59242	9.95351e-67	1.76183e-65
ENSG00000089057.15	SLC23A2	141.396	6.85651	1.00169e-66	1.77205e-65
ENSG00000263244.2	ENSG00000263244	197.655	7.92597	1.14132e-66	2.01794e-65
ENSG00000186591.13	UBE2H	159.315	7.29689	1.15846e-66	2.04712e-65
ENSG00000180011.7	ZADH2	181.59	7.69434	1.19516e-66	2.11079e-65
ENSG00000149639.15	SOGA1	111.946	5.68501	1.26261e-66	2.22867e-65
ENSG00000188895.12	MSL1	151.086	6.87364	1.26801e-66	2.23695e-65
ENSG00000065548.18	ZC3H15	152.297	6.75228	1.58061e-66	2.78686e-65
ENSG00000149311.20	ATM	135.938	5.01903	1.70867e-66	3.01098e-65
ENSG00000100014.20	SPECC1L	119.955	6.4003	1.73897e-66	3.06267e-65
ENSG00000102158.22	MAGT1	201.492	7.84824	1.7439e-66	3.06964e-65
ENSG00000131238.18	PPT1	141.559	6.85977	1.79098e-66	3.15077e-65
ENSG00000148396.19	SEC16A	127.021	5.70455	1.81156e-66	3.1852e-65
ENSG00000163788.14	SNRK	137.93	6.67177	2.06982e-66	3.63728e-65
ENSG00000152520.14	PAN3	188.182	7.74489	2.1722e-66	3.81508e-65
ENSG00000198833.7	UBE2J1	190.902	7.87944	2.21795e-66	3.89327e-65
ENSG00000078246.17	TULP3	122.041	6.49015	2.41489e-66	4.23662e-65
ENSG00000183495.14	EP400	131.956	6.1881	2.52197e-66	4.42202e-65
ENSG00000114331.16	ACAP2	134.715	6.56648	2.58222e-66	4.52516e-65
ENSG00000198604.11	BAZ1A	161.524	6.42315	2.59833e-66	4.55089e-65
ENSG00000164031.17	DNAJB14	153.976	6.89665	2.62635e-66	4.59741e-65
ENSG00000198231.14	DDX42	130.649	6.01259	2.65554e-66	4.64594e-65
ENSG00000162885.14	B3GALNT2	138.266	6.7483	2.86182e-66	5.00408e-65
ENSG00000088930.8	XRN2	160.207	6.89823	3.00848e-66	5.25762e-65
ENSG00000172840.7	PDP2	122.813	6.30032	3.30393e-66	5.77077e-65
ENSG00000169925.17	BRD3	124.435	6.03418	3.34722e-66	5.84315e-65
ENSG00000159579.14	RSPRY1	123.345	6.24547	3.61522e-66	6.30752e-65
ENSG00000088888.18	MAVS	161.782	7.31811	3.67469e-66	6.40775e-65
ENSG00000165672.7	PRDX3	150.395	6.21354	3.72289e-66	6.48823e-65
ENSG00000141446.11	ESCO1	184.966	7.61264	3.78209e-66	6.58778e-65
ENSG00000085415.16	SEH1L	125.13	6.26713	4.03782e-66	7.02935e-65
ENSG00000144791.10	LIMD1	116.694	5.62003	4.25533e-66	7.40395e-65
ENSG00000162636.16	FAM102B	147.091	7.17592	4.32293e-66	7.51744e-65
ENSG00000164209.17	SLC25A46	190.972	7.55773	4.40563e-66	7.65705e-65
ENSG00000131626.19	PPFIA1	106.418	5.40799	4.73119e-66	8.21838e-65
ENSG00000168014.18	C2CD3	136.527	5.9453	4.84674e-66	8.41448e-65
ENSG00000157538.14	VPS26C	127.464	6.42413	5.04501e-66	8.75389e-65
ENSG00000106462.12	EZH2	128.794	5.53871	5.35815e-66	9.29214e-65
ENSG00000148337.22	CIZ1	125.251	5.72957	5.76529e-66	9.99274e-65
ENSG00000198836.11	OPA1	146.809	6.69638	5.93682e-66	1.02844e-64
ENSG00000196396.10	PTPN1	130.048	6.73552	6.11072e-66	1.05799e-64
ENSG00000160352.16	ZNF714	219.631	8.08162	6.55689e-66	1.13462e-64
ENSG00000139946.10	PELI2	160.615	7.21214	6.98601e-66	1.20821e-64
ENSG00000070614.15	NDST1	119.269	6.19877	7.14161e-66	1.23445e-64
ENSG00000124222.22	STX16	152.678	7.14294	7.19417e-66	1.24286e-64
ENSG00000126067.12	PSMB2	118.873	6.3174	8.79495e-66	1.51858e-64
ENSG00000134086.9	VHL	152	7.13374	8.84357e-66	1.52614e-64
ENSG00000104131.13	EIF3J	164.689	7.1647	9.56441e-66	1.64964e-64
ENSG00000145390.12	USP53	152.337	6.81775	9.90388e-66	1.70726e-64
ENSG00000169895.6	SYAP1	157.554	7.18373	1.00579e-65	1.73286e-64
ENSG00000100221.11	JOSD1	151.464	7.13198	1.0222e-65	1.76019e-64
ENSG00000101654.18	RNMT	185.551	7.72516	1.04001e-65	1.78987e-64
ENSG00000087470.19	DNM1L	201.039	7.83884	1.06674e-65	1.83489e-64
ENSG00000170500.13	LONRF2	126.766	6.40468	1.06908e-65	1.8379e-64
ENSG00000033867.17	SLC4A7	115.787	6.09588	1.11611e-65	1.91772e-64
ENSG00000082269.17	FAM135A	139.869	6.69318	1.16921e-65	2.00729e-64
ENSG00000122966.17	CIT	105.196	4.98908	1.1695e-65	2.00729e-64
ENSG00000100216.6	TOMM22	130.233	6.15825	1.39875e-65	2.39946e-64
ENSG00000155313.16	USP25	134.404	6.71009	1.42386e-65	2.44121e-64
ENSG00000137992.15	DBT	121.545	6.35003	1.50819e-65	2.58439e-64
ENSG00000170153.11	RNF150	105.783	5.85231	1.68525e-65	2.88623e-64
ENSG00000134759.14	ELP2	122.088	5.6471	1.73126e-65	2.96344e-64
ENSG00000147526.20	TACC1	144.97	6.02541	1.74463e-65	2.98471e-64
ENSG00000145386.11	CCNA2	162.093	7.22656	1.86564e-65	3.19002e-64
ENSG00000112290.13	WASF1	131.388	6.67001	1.93503e-65	3.30687e-64
ENSG00000102974.16	CTCF	153.755	6.24859	1.93728e-65	3.30893e-64
ENSG00000175970.11	UNC119B	144.937	6.89332	1.97742e-65	3.37568e-64
ENSG00000110700.7	RPS13	100.038	5.13617	1.98697e-65	3.39016e-64
ENSG00000139372.15	TDG	150.074	7.11219	2.17917e-65	3.71608e-64
ENSG00000111911.7	HINT3	152.762	7.05656	2.25589e-65	3.84484e-64
ENSG00000187257.16	RSBN1L	155.181	7.16677	2.26797e-65	3.86335e-64
ENSG00000185650.10	ZFP36L1	128.466	6.72002	2.307e-65	3.92772e-64
ENSG00000100154.15	TTC28	143.273	6.72614	2.55586e-65	4.34909e-64
ENSG00000112144.16	CILK1	166.709	7.36465	2.5729e-65	4.37573e-64
ENSG00000130766.5	SESN2	137.789	6.59585	2.57534e-65	4.37753e-64
ENSG00000148358.20	GPR107	114.94	6.13699	2.64951e-65	4.50119e-64
ENSG00000151247.13	EIF4E	189.945	7.65513	2.74661e-65	4.66365e-64
ENSG00000085365.18	SCAMP1	202.057	7.95889	3.08226e-65	5.23077e-64
ENSG00000151414.15	NEK7	166.37	7.34991	3.09932e-65	5.2569e-64
ENSG00000106299.8	WASL	202.076	7.95966	3.31816e-65	5.62507e-64
ENSG00000182903.16	ZNF721	171.97	7.50752	3.32859e-65	5.63973e-64
ENSG00000100568.11	VTI1B	138.514	7.00155	3.42343e-65	5.79733e-64
ENSG00000125827.9	TMX4	125.769	6.61393	3.47267e-65	5.87756e-64
ENSG00000101782.15	RIOK3	162.567	7.2348	3.69744e-65	6.25466e-64
ENSG00000170776.22	AKAP13	107.417	5.10575	3.74618e-65	6.33372e-64
ENSG00000087086.15	FTL	122.975	5.57567	3.82732e-65	6.46745e-64
ENSG00000142875.20	PRKACB	153.658	7.14092	3.85065e-65	6.50341e-64
ENSG00000132463.15	GRSF1	139.488	6.6882	4.103e-65	6.92591e-64
ENSG00000125818.18	PSMF1	111.336	5.78071	4.18903e-65	7.06737e-64
ENSG00000140718.21	FTO	117.719	5.90237	4.38425e-65	7.3928e-64
ENSG00000115827.14	DCAF17	136.527	6.7318	4.49866e-65	7.58168e-64
ENSG00000124120.11	TTPAL	130.031	6.74269	5.06614e-65	8.53353e-64
ENSG00000183309.12	ZNF623	142.768	6.8811	5.25833e-65	8.85255e-64
ENSG00000171444.18	MCC	128.289	6.56641	5.41163e-65	9.10579e-64
ENSG00000135049.16	AGTPBP1	152.108	6.67987	5.47309e-65	9.20431e-64
ENSG00000117155.17	SSX2IP	131.547	6.83434	5.48576e-65	9.22074e-64
ENSG00000146909.8	NOM1	105.629	5.60638	5.60647e-65	9.41797e-64
ENSG00000107643.17	MAPK8	130.67	6.52117	5.60905e-65	9.41797e-64
ENSG00000100225.18	FBXO7	127.502	6.23608	5.75097e-65	9.65116e-64
ENSG00000174606.14	ANGEL2	120.863	6.34098	6.37944e-65	1.07002e-63
ENSG00000171843.17	MLLT3	182.149	7.69745	6.56033e-65	1.09977e-63
ENSG00000129625.13	REEP5	150.427	7.21273	6.61481e-65	1.10832e-63
ENSG00000139687.16	RB1	145.395	6.82475	7.21099e-65	1.20757e-63
ENSG00000198799.12	LRIG2	123.924	6.0318	7.49334e-65	1.25419e-63
ENSG00000152455.16	SUV39H2	182.09	7.59175	7.75799e-65	1.2978e-63
ENSG00000154059.11	IMPACT	131.773	6.84096	7.94228e-65	1.32793e-63
ENSG00000196821.10	ILRUN	123.895	6.74741	8.59093e-65	1.43563e-63
ENSG00000166483.12	WEE1	161.53	7.14069	8.90518e-65	1.48736e-63
ENSG00000187164.20	SHTN1	146.965	7.17853	9.21314e-65	1.53798e-63
ENSG00000161654.10	LSM12	132.286	6.93669	9.87244e-65	1.64717e-63
ENSG00000113456.19	RAD1	114.891	6.26623	9.98996e-65	1.6659e-63
ENSG00000173120.15	KDM2A	123.289	6.24472	1.00253e-64	1.67091e-63
ENSG00000260927.2	ENSG00000260927	141.323	7.02558	1.02669e-64	1.71029e-63
ENSG00000152234.16	ATP5F1A	124.848	6.38832	1.05686e-64	1.75962e-63
ENSG00000186951.17	PPARA	114.433	6.33079	1.08019e-64	1.79751e-63
ENSG00000136813.15	ECPAS	136.013	6.6573	1.10599e-64	1.83948e-63
ENSG00000132970.14	WASF3	107.055	6.04532	1.1168e-64	1.85649e-63
ENSG00000161800.13	RACGAP1	130.885	6.32795	1.14352e-64	1.89991e-63
ENSG00000198242.14	RPL23A	106.168	4.94286	1.15469e-64	1.91747e-63
ENSG00000100422.14	CERK	140.507	6.76873	1.21491e-64	2.0164e-63
ENSG00000196792.12	STRN3	140.471	6.77112	1.2208e-64	2.02513e-63
ENSG00000100815.12	TRIP11	117.883	6.12074	1.22621e-64	2.03303e-63
ENSG00000163374.20	YY1AP1	124.892	6.1512	1.3495e-64	2.23627e-63
ENSG00000122299.12	ZC3H7A	129.652	6.31715	1.3703e-64	2.26955e-63
ENSG00000167378.10	IRGQ	154.523	7.15278	1.57495e-64	2.60715e-63
ENSG00000031003.11	FAM13B	150.926	6.95763	1.65616e-64	2.74014e-63
ENSG00000127526.15	SLC35E1	127.128	6.70671	1.66754e-64	2.75753e-63
ENSG00000136875.13	PRPF4	143.073	6.65739	1.81216e-64	2.99511e-63
ENSG00000100934.15	SEC23A	142.751	6.73244	1.84733e-64	3.05166e-63
ENSG00000196693.15	ZNF33B	167.403	7.46631	2.11946e-64	3.49938e-63
ENSG00000141030.13	COPS3	123.85	6.02916	2.26408e-64	3.73621e-63
ENSG00000162623.16	TYW3	139.882	6.92893	2.27487e-64	3.75205e-63
ENSG00000204406.14	MBD5	116.795	6.35879	2.32636e-64	3.83499e-63
ENSG00000048028.11	USP28	126.448	6.48353	2.37664e-64	3.91584e-63
ENSG00000101596.17	SMCHD1	139.682	6.42682	2.56532e-64	4.22451e-63
ENSG00000136868.11	SLC31A1	148.742	7.40186	2.97929e-64	4.90368e-63
ENSG00000067369.14	TP53BP1	113.309	6.00839	2.98163e-64	4.90498e-63
ENSG00000166949.17	SMAD3	104.521	5.78733	2.9967e-64	4.92721e-63
ENSG00000118412.13	CASP8AP2	228.628	8.27074	3.10667e-64	5.10538e-63
ENSG00000154639.19	CXADR	163.797	7.43366	3.1126e-64	5.11248e-63
ENSG00000114126.18	TFDP2	138.146	6.91465	3.14696e-64	5.16622e-63
ENSG00000064703.13	DDX20	158.896	7.03924	3.29026e-64	5.39868e-63
ENSG00000141449.16	GREB1L	112.96	5.65791	3.57895e-64	5.86933e-63
ENSG00000150907.10	FOXO1	191.611	8.0071	3.6981e-64	6.0616e-63
ENSG00000134762.17	DSC3	130.523	6.52217	3.71355e-64	6.08377e-63
ENSG00000087302.9	RTRAF	114.94	6.33763	3.88229e-64	6.35692e-63
ENSG00000217128.13	FNIP1	170.165	7.49686	4.03559e-64	6.60452e-63
ENSG00000183955.14	KMT5A	145.496	6.98726	4.18286e-64	6.842e-63
ENSG00000088179.9	PTPN4	171.051	7.49863	4.56961e-64	7.47077e-63
ENSG00000141279.17	NPEPPS	121.301	6.3461	4.75418e-64	7.76851e-63
ENSG00000140632.17	GLYR1	112.529	5.65661	5.84907e-64	9.55268e-63
ENSG00000100522.10	GNPNAT1	144.97	6.89362	5.87391e-64	9.58831e-63
ENSG00000117592.9	PRDX6	144.135	6.60199	6.01805e-64	9.81854e-63
ENSG00000116731.23	PRDM2	137.549	7.08267	6.55679e-64	1.0692e-62
ENSG00000196632.11	WNK3	115.341	6.34449	9.04399e-64	1.47402e-62
ENSG00000134247.10	PTGFRN	125.933	6.61996	9.07815e-64	1.47883e-62
ENSG00000107164.16	FUBP3	118.375	6.01965	9.68187e-64	1.57636e-62
ENSG00000198793.13	MTOR	116.383	5.57908	9.81276e-64	1.59685e-62
ENSG00000102471.15	NDFIP2	164.694	7.25632	1.00533e-63	1.63516e-62
ENSG00000135823.14	STX6	146.209	7.26862	1.01468e-63	1.64952e-62
ENSG00000129657.16	SEC14L1	125.912	5.73534	1.07286e-63	1.7432e-62
ENSG00000211455.8	STK38L	122.018	6.49373	1.24043e-63	2.01444e-62
ENSG00000130559.19	CAMSAP1	111.879	5.88399	1.32435e-63	2.14963e-62
ENSG00000168374.11	ARF4	162.264	7.23624	1.32915e-63	2.15632e-62
ENSG00000135250.17	SRPK2	159.559	7.12117	1.36933e-63	2.22035e-62
ENSG00000165105.10	RASEF	152.034	7.23227	1.4155e-63	2.29405e-62
ENSG00000117625.14	RCOR3	118.242	5.9605	1.4545e-63	2.35606e-62
ENSG00000197102.14	DYNC1H1	119.101	4.57473	1.54377e-63	2.49938e-62
ENSG00000006530.18	AGK	108.482	5.84066	1.62016e-63	2.62171e-62
ENSG00000160075.12	SSU72	119.229	6.32621	1.65326e-63	2.67391e-62
ENSG00000145332.14	KLHL8	155.831	6.91699	1.81177e-63	2.92879e-62
ENSG00000174485.16	DENND4A	129.745	6.27075	1.81689e-63	2.93556e-62
ENSG00000179021.10	C3orf38	220.418	8.21404	1.86064e-63	3.00472e-62
ENSG00000122257.20	RBBP6	163.796	7.16828	2.02191e-63	3.26349e-62
ENSG00000221823.11	PPP3R1	181.179	7.80332	2.07994e-63	3.35543e-62
ENSG00000160209.19	PDXK	118.606	5.82555	2.0971e-63	3.3814e-62
ENSG00000102606.19	ARHGEF7	114.435	6.07697	2.16351e-63	3.48671e-62
ENSG00000197498.13	RPF2	109.632	6.07771	2.17559e-63	3.5044e-62
ENSG00000144043.12	TEX261	138.853	7.19375	2.7938e-63	4.4979e-62
ENSG00000109458.9	GAB1	133.201	6.77043	2.82481e-63	4.54553e-62
ENSG00000043093.15	DCUN1D1	196.376	8.04882	2.91726e-63	4.6919e-62
ENSG00000166037.11	CEP57	152.472	7.23309	2.99815e-63	4.81955e-62
ENSG00000211456.13	SACM1L	142.046	6.94825	3.0389e-63	4.88258e-62
ENSG00000170185.11	USP38	147.396	7.005	3.0784e-63	4.94354e-62
ENSG00000146729.10	NIPSNAP2	138.902	6.83439	3.24718e-63	5.21194e-62
ENSG00000066422.6	ZBTB11	134.562	6.50197	3.4696e-63	5.56612e-62
ENSG00000152457.18	DCLRE1C	114.224	6.13604	3.82814e-63	6.1382e-62
ENSG00000133884.10	DPF2	120.863	6.11	3.88161e-63	6.22079e-62
ENSG00000153107.13	ANAPC1	120.508	6.34	3.9661e-63	6.35297e-62
ENSG00000156030.14	MIDEAS	113.907	5.81708	4.01689e-63	6.43109e-62
ENSG00000182446.14	NPLOC4	124.698	6.32596	4.02527e-63	6.44124e-62
ENSG00000013561.18	RNF14	106.872	6.23081	4.17604e-63	6.67913e-62
ENSG00000143727.16	ACP1	129.806	6.74014	4.19728e-63	6.70972e-62
ENSG00000086475.15	SEPHS1	135.174	6.71704	4.35125e-63	6.95234e-62
ENSG00000116191.19	RALGPS2	152.642	7.04992	4.5107e-63	7.20348e-62
ENSG00000174371.17	EXO1	239.356	8.48059	4.70313e-63	7.507e-62
ENSG00000165637.14	VDAC2	141.192	6.71272	4.81044e-63	7.67443e-62
ENSG00000148248.14	SURF4	150.696	6.873	4.8486e-63	7.7314e-62
ENSG00000131323.16	TRAF3	110.987	6.35695	4.93851e-63	7.87081e-62
ENSG00000101974.15	ATP11C	127.814	6.71313	5.07092e-63	8.07778e-62
ENSG00000163257.11	DCAF16	159.546	7.2963	5.13332e-63	8.17308e-62
ENSG00000184743.13	ATL3	133.54	6.85114	5.43759e-63	8.65317e-62
ENSG00000089685.15	BIRC5	119.654	6.40251	6.15276e-63	9.78634e-62
ENSG00000157514.18	TSC22D3	130.254	6.10218	6.18282e-63	9.82923e-62
ENSG00000198218.11	QRICH1	122.239	6.29456	6.43887e-63	1.02311e-61
ENSG00000184432.11	COPB2	107.834	5.42271	6.63272e-63	1.05339e-61
ENSG00000166441.13	RPL27A	151.052	4.69347	9.21522e-63	1.4628e-61
ENSG00000071626.17	DAZAP1	119.389	6.02914	9.63247e-63	1.52827e-61
ENSG00000206557.6	TRIM71	134.419	7.05061	9.96071e-63	1.57956e-61
[truncated: 2,665 more rows]

## Sheet: Supplementary Fig.1c,d
Enrichment analysis of EPN24-IGF2BP1 versus EPN24-GFP with and without rRNA depletion in HEK293T, related to Supplementary Fig.1c,d
		EPN24-IGF2BP1 vs EPN24-GFP rRNA depletion				EPN24-IGF2BP1 vs EPN24-GFP without rRNA depletion
gene_id	gene_symbol	log2FoldChange	pvalue	padj	target	log2FoldChange	pvalue	padj	target
ENSG00000160075.12	SSU72	5.88627	2.90037e-41	6.19239e-40	TRUE	6.60267	9.47462e-37	2.11641e-35	TRUE
ENSG00000189339.12	SLC35E2B	6.05536	3.82905e-32	4.93386e-31	TRUE	7.39825	9.57167e-30	1.31833e-28	TRUE
ENSG00000008130.15	NADK	6.29183	5.30264e-29	5.78719e-28	TRUE	6.68679	1.68845e-24	1.73717e-23	TRUE
ENSG00000078369.18	GNB1	6.51221	1.19027e-67	1.6327e-65	TRUE	7.06701	3.705e-58	5.23584e-56	TRUE
ENSG00000157933.10	SKI	7.62122	8.40149e-57	5.0157e-55	TRUE	8.65687	2.28823e-48	1.28077e-46	TRUE
ENSG00000157916.20	RER1	5.47105	2.57121e-22	2.07631e-21	FALSE	6.83092	2.19025e-24	2.2393e-23	TRUE
ENSG00000227372.12	TP73-AS1	5.19218	6.04249e-30	6.93028e-29	TRUE	4.85914	4.66817e-17	3.18784e-16	TRUE
ENSG00000130764.10	LRRC47	5.41711	2.76247e-30	3.2316e-29	TRUE	5.41463	4.38082e-22	3.93538e-21	TRUE
ENSG00000116198.14	CEP104	4.79418	3.44797e-28	3.62046e-27	TRUE	4.39454	1.57073e-18	1.16448e-17	TRUE
ENSG00000198912.12	C1orf174	5.7983	6.65422e-23	5.50678e-22	TRUE	6.17729	1.05058e-20	8.72483e-20	TRUE
ENSG00000285629.1	ENSG00000285629	4.66628	3.61973e-23	3.03467e-22	FALSE	4.84573	2.90522e-19	2.23522e-18	TRUE
ENSG00000116251.11	RPL22	5.09594	1.4295e-34	2.09316e-33	TRUE	5.53654	1.73636e-30	2.49503e-29	TRUE
ENSG00000116237.16	ICMT	10.1143	1.14638e-59	8.44301e-58	TRUE	8.51061	3.26506e-68	1.1279e-65	TRUE
ENSG00000162408.11	NOL9	6.68122	1.35186e-58	8.98623e-57	TRUE	6.80158	5.26063e-49	3.15076e-47	TRUE
ENSG00000162413.17	KLHL21	5.20272	2.73186e-25	2.5094e-24	FALSE	5.97459	1.09627e-20	9.09765e-20	TRUE
ENSG00000116273.6	PHF13	7.47385	8.39356e-42	1.84983e-40	TRUE	7.64501	1.14556e-35	2.36006e-34	TRUE
ENSG00000007923.17	DNAJC11	4.53282	9.20207e-25	8.22252e-24	FALSE	4.50412	3.60011e-16	2.35007e-15	TRUE
ENSG00000171735.19	CAMTA1	5.28706	1.69195e-35	2.60193e-34	TRUE	4.97396	1.66832e-19	1.30114e-18	TRUE
ENSG00000049245.13	VAMP3	7.49131	5.66003e-52	2.42571e-50	TRUE	7.7499	4.13963e-45	1.79431e-43	TRUE
ENSG00000116285.13	ERRFI1	7.32392	1.14996e-44	2.9832e-43	TRUE	7.37161	1.1231e-33	1.99216e-32	TRUE
ENSG00000142599.19	RERE	5.72595	1.44112e-48	4.89288e-47	TRUE	5.44802	1.70555e-29	2.31737e-28	TRUE
ENSG00000074800.16	ENO1	5.69988	1.30838e-55	7.18367e-54	TRUE	5.86011	4.23489e-51	2.99234e-49	TRUE
ENSG00000171612.7	SLC25A33	6.87313	9.17732e-24	7.85637e-23	FALSE	6.67666	3.47095e-23	3.3381e-22	TRUE
ENSG00000188807.13	TMEM201	5.04973	5.76313e-27	5.74129e-26	TRUE	5.22017	3.49708e-19	2.67136e-18	TRUE
ENSG00000171603.18	CLSTN1	5.36755	1.09813e-32	1.45286e-31	TRUE	5.23443	4.42969e-21	3.74978e-20	TRUE
ENSG00000162441.12	LZIC	6.10429	2.22489e-35	3.39604e-34	TRUE	6.43047	4.12445e-29	5.49482e-28	TRUE
ENSG00000130939.20	UBE4B	5.70731	6.36205e-39	1.18574e-37	TRUE	5.38364	4.15746e-25	4.42794e-24	TRUE
ENSG00000054523.20	KIF1B	5.95624	6.95386e-44	1.71707e-42	TRUE	6.25474	6.67812e-45	2.82655e-43	TRUE
ENSG00000142657.21	PGD	5.59934	2.59949e-34	3.76335e-33	TRUE	5.76038	1.23447e-20	1.02098e-19	TRUE
ENSG00000160049.12	DFFA	7.49644	2.81081e-50	1.0704e-48	TRUE	6.87411	8.60006e-46	3.88525e-44	TRUE
ENSG00000120948.19	TARDBP	8.35903	7.72115e-75	1.81997e-72	TRUE	7.67079	7.77783e-51	5.35199e-49	TRUE
ENSG00000116649.10	SRM	6.80375	9.25229e-43	2.13788e-41	TRUE	5.95519	2.7229e-27	3.27082e-26	TRUE
ENSG00000171824.14	EXOSC10	5.52105	1.14519e-33	1.59649e-32	TRUE	5.40976	4.41855e-19	3.36173e-18	TRUE
ENSG00000198793.13	MTOR	5.08898	1.52265e-38	2.79418e-37	TRUE	4.89299	6.2473e-24	6.2526e-23	TRUE
ENSG00000120942.14	UBIAD1	7.04721	2.89385e-25	2.65462e-24	FALSE	5.86798	1.86089e-18	1.37274e-17	TRUE
ENSG00000116688.18	MFN2	5.04329	1.02598e-33	1.43371e-32	TRUE	5.89095	3.79218e-37	8.72737e-36	TRUE
ENSG00000048707.15	VPS13D	4.17937	5.05127e-19	3.56273e-18	TRUE	4.14099	1.36129e-19	1.0663e-18	TRUE
ENSG00000116731.23	PRDM2	6.27004	1.42816e-53	6.80309e-52	TRUE	5.73643	1.56859e-28	2.01974e-27	TRUE
ENSG00000189337.17	KAZN	3.86136	1.96395e-18	1.34856e-17	FALSE	4.44896	1.92889e-14	1.14964e-13	TRUE
ENSG00000116138.13	DNAJC16	4.99385	9.08307e-29	9.7752e-28	TRUE	5.39077	1.32217e-16	8.82972e-16	TRUE
ENSG00000197312.12	DDI2	7.43653	2.08881e-71	3.6927e-69	TRUE	6.67196	6.77851e-47	3.37436e-45	TRUE
ENSG00000215695.2	RSC1A1	10.887	7.62341e-15	4.46157e-14	TRUE	8.30876	3.25014e-24	3.2963e-23	TRUE
ENSG00000065526.12	SPEN	8.43563	1.1075e-91	1.05635e-88	TRUE	8.27489	5.60677e-75	4.35787e-72	TRUE
ENSG00000037637.11	FBXO42	6.26756	4.057e-40	8.06563e-39	TRUE	6.29425	3.84029e-29	5.13425e-28	TRUE
ENSG00000055070.17	SZRD1	7.45316	4.04415e-59	2.82086e-57	TRUE	6.49891	2.17071e-46	1.03682e-44	TRUE
ENSG00000187144.11	SPATA21	5.30301	8.11444e-29	8.76266e-28	TRUE	4.94272	1.7153e-17	1.20061e-16	TRUE
ENSG00000157191.20	NECAP2	4.9135	8.13588e-29	8.7835e-28	TRUE	6.17284	2.88797e-17	1.99728e-16	TRUE
ENSG00000219481.11	NBPF1	3.89709	1.49356e-26	1.45711e-25	TRUE	3.7959	5.15623e-18	3.7155e-17	TRUE
ENSG00000227751.1	RCC2-AS1	7.90192	1.60381e-12	8.48537e-12	FALSE	9.06319	1.37085e-14	8.24369e-14	TRUE
ENSG00000179051.14	RCC2	8.22609	3.41974e-69	5.23348e-67	TRUE	8.63422	1.1872e-66	3.53052e-64	TRUE
ENSG00000127481.15	UBR4	4.6349	3.56743e-36	5.69096e-35	TRUE	4.74111	5.11352e-31	7.59675e-30	TRUE
ENSG00000077549.19	CAPZB	4.70181	1.9031e-29	2.11414e-28	TRUE	3.87639	1.71171e-11	8.78696e-11	TRUE
ENSG00000169914.6	OTUD3	6.83206	4.70157e-36	7.43657e-35	TRUE	6.71968	9.07248e-37	2.03455e-35	TRUE
ENSG00000127483.19	HP1BP3	6.66127	4.3594e-52	1.88803e-50	TRUE	6.46248	4.1109e-37	9.43549e-36	TRUE
ENSG00000075151.24	EIF4G3	5.454	7.53194e-45	1.98404e-43	TRUE	6.08866	1.95431e-42	6.69693e-41	TRUE
ENSG00000289694.1	ENSG00000289694	7.19796	2.00434e-50	7.73339e-49	TRUE	7.13337	3.36603e-42	1.13526e-40	TRUE
ENSG00000070831.18	CDC42	5.6103	1.37126e-45	3.79493e-44	TRUE	5.78534	9.97128e-36	2.06172e-34	TRUE
ENSG00000184677.18	ZBTB40	4.86079	1.96755e-31	2.4523e-30	TRUE	4.98034	1.79852e-22	1.65663e-21	TRUE
ENSG00000004487.18	KDM1A	4.37443	5.95779e-27	5.93089e-26	TRUE	4.35704	2.54039e-16	1.67203e-15	TRUE
ENSG00000169641.14	LUZP1	6.31074	2.17806e-45	5.93561e-44	TRUE	6.5945	1.42078e-39	3.91532e-38	TRUE
ENSG00000125944.21	HNRNPR	6.50548	4.98007e-62	4.40199e-60	TRUE	7.63017	7.65329e-58	1.05966e-55	TRUE
ENSG00000125945.15	ZNF436	8.35481	6.88202e-25	6.19125e-24	TRUE	6.26711	2.13033e-22	1.95113e-21	TRUE
ENSG00000007968.7	E2F2	6.01535	5.08741e-35	7.62906e-34	TRUE	5.32344	3.62481e-25	3.87269e-24	TRUE
ENSG00000142676.14	RPL11	5.56935	7.80191e-42	1.72314e-40	TRUE	5.5118	2.45726e-47	1.25991e-45	TRUE
ENSG00000011007.13	ELOA	6.96677	2.82976e-50	1.07662e-48	TRUE	6.60037	3.64882e-35	7.19642e-34	TRUE
ENSG00000189266.13	PNRC2	7.86752	1.12089e-42	2.58417e-41	TRUE	7.48054	4.48549e-43	1.63365e-41	TRUE
ENSG00000188529.15	SRSF10	7.53068	3.57407e-71	6.18511e-69	TRUE	7.35721	4.23853e-69	1.55864e-66	TRUE
ENSG00000001460.18	STPG1	5.38426	1.03728e-33	1.44851e-32	TRUE	5.69034	1.63007e-18	1.20769e-17	TRUE
ENSG00000001461.17	NIPAL3	5.05007	8.67151e-31	1.04205e-29	TRUE	5.05122	2.37881e-23	2.30723e-22	TRUE
ENSG00000117602.13	RCAN3	6.38898	9.77807e-36	1.52544e-34	TRUE	6.32634	8.47587e-30	1.17355e-28	TRUE
ENSG00000133226.18	SRRM1	7.33414	5.69909e-85	3.48869e-82	TRUE	7.12324	5.47954e-60	8.92356e-58	TRUE
ENSG00000169504.15	CLIC4	8.30191	2.96101e-58	1.9155e-56	TRUE	8.04015	8.7978e-58	1.2035e-55	TRUE
ENSG00000183726.11	TMEM50A	6.45876	5.06564e-37	8.50787e-36	TRUE	6.43828	4.53398e-26	5.10058e-25	TRUE
ENSG00000204178.11	MACO1	7.39578	2.00447e-28	2.12873e-27	TRUE	7.50274	2.79726e-24	2.84713e-23	TRUE
ENSG00000162430.18	SELENON	6.58098	4.95819e-47	1.48978e-45	TRUE	6.18048	2.69045e-31	4.08392e-30	TRUE
ENSG00000127423.11	AUNIP	6.17577	3.94502e-30	4.57452e-29	TRUE	6.44628	1.94466e-19	1.51149e-18	TRUE
ENSG00000117632.23	STMN1	7.28828	3.47962e-54	1.74253e-52	TRUE	6.96017	1.01093e-42	3.56789e-41	TRUE
ENSG00000175087.10	PDIK1L	9.59989	2.96071e-25	2.71353e-24	TRUE	7.32709	1.0256e-30	1.49253e-29	TRUE
ENSG00000130695.16	CEP85	5.8166	4.23792e-37	7.1499e-36	TRUE	6.03071	1.34793e-24	1.39395e-23	TRUE
ENSG00000117682.17	DHDDS	5.042	4.03759e-27	4.0439e-26	TRUE	4.17331	1.56752e-12	8.52541e-12	FALSE
ENSG00000198830.11	HMGN2	7.81361	1.05532e-68	1.56822e-66	TRUE	7.35267	7.89546e-58	1.08878e-55	TRUE
ENSG00000117713.21	ARID1A	6.20007	1.34797e-63	1.36172e-61	TRUE	5.66562	8.67669e-33	1.45316e-31	TRUE
ENSG00000204160.12	ZDHHC18	5.11506	5.58156e-32	7.13153e-31	TRUE	6.26632	5.97914e-27	7.04377e-26	TRUE
ENSG00000158195.11	WASF2	7.0429	2.59564e-68	3.77509e-66	TRUE	6.90976	4.43759e-53	3.76578e-51	TRUE
ENSG00000009780.16	FAM76A	4.97739	6.74326e-24	5.80294e-23	TRUE	5.74986	6.18671e-22	5.51418e-21	TRUE
ENSG00000117758.14	STX12	7.1213	2.21043e-48	7.37661e-47	TRUE	8.21448	1.76522e-31	2.70469e-30	TRUE
ENSG00000117751.18	PPP1R8	6.90516	3.95007e-53	1.82032e-51	TRUE	8.24114	3.38194e-53	2.91895e-51	TRUE
ENSG00000117748.10	RPA2	5.71701	1.96449e-38	3.58201e-37	TRUE	5.99698	3.81437e-28	4.8047e-27	TRUE
ENSG00000158161.16	EYA3	7.19871	2.39355e-57	1.47401e-55	TRUE	6.72206	7.20067e-52	5.46022e-50	TRUE
ENSG00000126698.11	DNAJC8	7.11169	3.24147e-66	3.99237e-64	TRUE	6.88239	1.447e-41	4.61488e-40	TRUE
ENSG00000130770.18	ATP5IF1	5.55684	6.23952e-33	8.37394e-32	TRUE	6.65452	4.44548e-19	3.38072e-18	TRUE
ENSG00000130766.5	SESN2	5.90894	1.54849e-41	3.36387e-40	TRUE	6.72917	9.53318e-36	1.97352e-34	TRUE
ENSG00000204138.13	PHACTR4	6.5873	2.1027e-65	2.34348e-63	TRUE	6.74843	2.43582e-49	1.477e-47	TRUE
ENSG00000180198.17	RCC1	5.76513	3.7754e-48	1.23677e-46	TRUE	5.9868	3.84583e-39	1.02592e-37	TRUE
ENSG00000120656.14	TAF12	4.89162	9.78591e-28	1.00642e-26	TRUE	4.30258	1.56564e-13	8.91647e-13	FALSE
ENSG00000162419.13	GMEB1	4.91427	2.67605e-31	3.30888e-30	TRUE	5.03736	2.67638e-22	2.43559e-21	TRUE
ENSG00000198492.16	YTHDF2	7.95485	2.53895e-76	6.8962e-74	TRUE	8.16843	1.02286e-65	2.77625e-63	TRUE
ENSG00000159023.22	EPB41	5.67591	2.27661e-46	6.57093e-45	TRUE	5.8085	1.02939e-36	2.29493e-35	TRUE
ENSG00000116350.18	SRSF4	5.847	2.71243e-44	6.8884e-43	TRUE	6.45009	5.5634e-45	2.37235e-43	TRUE
ENSG00000162512.16	SDC3	3.76063	1.66324e-22	1.35753e-21	TRUE	3.39739	7.73807e-10	3.63209e-09	TRUE
ENSG00000134644.16	PUM1	7.48858	1.6552e-79	6.34453e-77	TRUE	6.8656	6.75317e-61	1.20917e-58	TRUE
ENSG00000060688.13	SNRNP40	4.52285	1.3857e-22	1.1353e-21	FALSE	4.87082	6.84783e-25	7.21914e-24	TRUE
ENSG00000162517.13	PEF1	6.2078	6.05375e-31	7.33713e-30	TRUE	5.96271	2.69183e-19	2.07478e-18	TRUE
ENSG00000184007.22	PTP4A2	7.04825	1.76719e-75	4.41949e-73	TRUE	8.09373	8.47249e-71	4.081e-68	TRUE
ENSG00000121774.18	KHDRBS1	7.26824	8.68644e-66	1.00925e-63	TRUE	6.67471	3.67438e-55	3.79638e-53	TRUE
ENSG00000025800.14	KPNA6	7.86034	9.49858e-94	1.14581e-90	TRUE	7.48563	1.18896e-54	1.17179e-52	TRUE
ENSG00000084652.16	TXLNA	7.2481	3.13615e-72	6.12505e-70	TRUE	7.42802	3.29635e-56	3.77029e-54	TRUE
ENSG00000084623.12	EIF3I	3.5782	4.43925e-20	3.27761e-19	TRUE	3.75793	6.47969e-16	4.17324e-15	TRUE
ENSG00000116478.12	HDAC1	6.16236	1.58614e-38	2.90808e-37	TRUE	5.63786	5.4879e-34	9.96711e-33	TRUE
ENSG00000175130.7	MARCKSL1	7.3158	1.59223e-61	1.34647e-59	TRUE	7.96034	2.72338e-39	7.32783e-38	TRUE
ENSG00000160058.19	BSDC1	5.63453	2.10446e-40	4.26234e-39	TRUE	4.90193	1.0547e-22	9.84165e-22	TRUE
ENSG00000160062.15	ZBTB8A	5.61427	1.7171e-28	1.82827e-27	TRUE	5.71007	1.13578e-21	9.94434e-21	TRUE
ENSG00000162521.19	RBBP4	7.92053	2.74313e-81	1.26412e-78	TRUE	7.72844	4.37752e-66	1.23725e-63	TRUE
ENSG00000162520.15	SYNC	7.53422	4.84769e-48	1.57546e-46	TRUE	8.04484	1.31686e-45	5.8793e-44	TRUE
ENSG00000162522.11	KIAA1522	4.94088	2.04133e-31	2.54322e-30	TRUE	4.82748	1.7365e-20	1.42209e-19	TRUE
ENSG00000134684.13	YARS1	4.92935	5.21251e-40	1.03029e-38	TRUE	5.49838	1.30621e-36	2.88386e-35	TRUE
ENSG00000116497.18	S100PBP	6.42631	3.68438e-48	1.20889e-46	TRUE	5.31774	9.74659e-24	9.65595e-23	TRUE
ENSG00000004455.18	AK2	5.81517	2.29318e-47	7.06101e-46	TRUE	6.05523	4.32567e-45	1.87021e-43	TRUE
ENSG00000160094.15	ZNF362	5.89495	1.91864e-39	3.69095e-38	TRUE	5.73299	6.53804e-23	6.18006e-22	TRUE
ENSG00000134686.20	PHC2	4.71491	1.12573e-25	1.0522e-24	TRUE	4.10331	1.38514e-14	8.32372e-14	TRUE
ENSG00000121903.15	ZSCAN20	4.14227	6.74842e-21	5.15226e-20	TRUE	3.47958	7.23385e-13	3.99403e-12	TRUE
ENSG00000197056.11	ZMYM1	7.22653	5.40703e-38	9.61265e-37	TRUE	6.78297	3.65423e-31	5.486e-30	TRUE
ENSG00000116560.12	SFPQ	6.41138	4.62982e-54	2.2961e-52	TRUE	6.40779	3.14111e-57	3.96394e-55	TRUE
ENSG00000146463.12	ZMYM4	7.47364	2.74597e-66	3.40041e-64	TRUE	7.4882	2.09816e-52	1.68439e-50	TRUE
ENSG00000126067.12	PSMB2	6.93615	4.80222e-46	1.36492e-44	TRUE	6.04098	3.5066e-35	6.91993e-34	TRUE
ENSG00000092853.14	CLSPN	5.79019	1.34379e-49	4.88167e-48	TRUE	6.17712	8.01521e-45	3.37161e-43	TRUE
ENSG00000134698.11	AGO4	5.31899	9.55629e-26	8.96072e-25	TRUE	5.59407	2.91795e-21	2.49602e-20	TRUE
ENSG00000092847.13	AGO1	5.9848	2.58129e-52	1.13018e-50	TRUE	5.87418	1.32138e-42	4.62065e-41	TRUE
ENSG00000126070.20	AGO3	4.66163	1.71013e-29	1.91011e-28	TRUE	5.33977	5.25486e-26	5.89603e-25	TRUE
ENSG00000054118.15	THRAP3	7.02788	8.6736e-62	7.56891e-60	TRUE	7.02214	7.32094e-42	2.40277e-40	TRUE
ENSG00000196182.11	STK40	5.67561	3.99052e-30	4.62599e-29	TRUE	5.53018	2.221e-26	2.54033e-25	TRUE
ENSG00000163875.16	MEAF6	5.77652	1.88621e-43	4.54529e-42	TRUE	5.7985	9.36139e-30	1.29041e-28	TRUE
ENSG00000163877.11	SNIP1	6.64634	3.84299e-23	3.21469e-22	FALSE	6.54006	1.14899e-22	1.06836e-21	TRUE
ENSG00000134697.13	GNL2	5.56447	8.34305e-39	1.54904e-37	TRUE	5.30134	9.3889e-24	9.30429e-23	TRUE
ENSG00000134690.11	CDCA8	7.43987	4.08047e-34	5.83733e-33	TRUE	7.0919	3.11387e-25	3.34773e-24	TRUE
ENSG00000196449.4	YRDC	7.02563	1.65464e-24	1.46289e-23	FALSE	6.9869	1.72503e-22	1.591e-21	TRUE
ENSG00000188786.10	MTF1	6.47755	2.95659e-45	8.00407e-44	TRUE	6.70316	3.64147e-41	1.12599e-39	TRUE
ENSG00000183431.12	SF3A3	6.45241	1.44348e-29	1.62022e-28	TRUE	6.0198	1.52932e-31	2.35273e-30	TRUE
ENSG00000183520.12	UTP11	6.25033	6.8665e-28	7.11887e-27	TRUE	4.83865	5.84681e-20	4.67622e-19	TRUE
ENSG00000214114.9	MYCBP	8.28907	1.61273e-23	1.36832e-22	TRUE	6.73821	4.00784e-23	3.83397e-22	TRUE
ENSG00000174574.16	AKIRIN1	8.56843	1.83114e-15	1.09928e-14	TRUE	8.87236	4.40837e-54	4.09679e-52	TRUE
ENSG00000127603.32	MACF1	3.08767	1.92906e-16	1.21291e-15	TRUE	3.28709	3.71405e-15	2.30646e-14	TRUE
ENSG00000090621.15	PABPC4	5.12484	3.5351e-34	5.07486e-33	TRUE	6.05216	5.31737e-37	1.20991e-35	TRUE
ENSG00000131236.18	CAP1	6.50682	1.00826e-57	6.33273e-56	TRUE	6.40275	2.18701e-44	8.83042e-43	TRUE
ENSG00000131238.18	PPT1	6.78461	5.55072e-47	1.66173e-45	TRUE	6.82403	2.10246e-33	3.65728e-32	TRUE
ENSG00000117000.9	RLF	7.81444	5.71134e-50	2.13727e-48	TRUE	8.20942	2.51523e-52	1.99117e-50	TRUE
ENSG00000084073.10	ZMPSTE24	7.04624	2.94817e-41	6.28789e-40	TRUE	7.66667	2.8091e-31	4.25834e-30	TRUE
ENSG00000084070.12	SMAP2	5.64293	2.69856e-31	3.3357e-30	TRUE	5.58438	3.12812e-19	2.40185e-18	TRUE
ENSG00000066136.21	NFYC	5.73241	2.84417e-32	3.68449e-31	TRUE	5.32488	2.40294e-18	1.7597e-17	TRUE
ENSG00000171793.17	CTPS1	4.90414	6.98502e-29	7.56692e-28	TRUE	5.19902	3.52351e-27	4.21036e-26	TRUE
ENSG00000010803.17	SCMH1	7.01955	2.97364e-41	6.33893e-40	TRUE	5.4094	5.4842e-25	5.80483e-24	TRUE
ENSG00000198815.9	FOXJ3	7.45835	7.82704e-68	1.08452e-65	TRUE	7.61203	4.30563e-55	4.42187e-53	TRUE
ENSG00000177181.15	RIMKLA	5.33447	5.89977e-28	6.13678e-27	TRUE	5.28078	2.22397e-20	1.81435e-19	TRUE
ENSG00000065978.19	YBX1	6.5138	5.43236e-81	2.42177e-78	TRUE	6.38612	1.36357e-66	4.01534e-64	TRUE
ENSG00000187147.18	RNF220	4.3835	1.86573e-24	1.64526e-23	TRUE	4.29893	1.09402e-13	6.27865e-13	TRUE
ENSG00000142937.12	RPS8	5.34038	9.14921e-36	1.42842e-34	TRUE	6.08415	5.91136e-52	4.52265e-50	TRUE
ENSG00000132763.15	MMACHC	5.41084	5.53815e-24	4.78899e-23	FALSE	5.6056	5.52581e-19	4.18184e-18	TRUE
ENSG00000117450.15	PRDX1	5.60453	1.11992e-19	8.1138e-19	FALSE	5.19508	8.96857e-19	6.73045e-18	TRUE
ENSG00000159592.11	GPBP1L1	6.66376	1.2129e-50	4.78787e-49	TRUE	6.94176	1.21815e-43	4.65988e-42	TRUE
ENSG00000159596.7	TMEM69	9.92637	3.68749e-12	1.92489e-11	TRUE	7.10029	3.15356e-14	1.85946e-13	FALSE
ENSG00000117461.15	PIK3R3	4.89671	2.2812e-27	2.31358e-26	TRUE	5.15993	1.29989e-21	1.13318e-20	TRUE
ENSG00000117481.11	NSUN4	5.62135	1.54155e-33	2.1331e-32	TRUE	5.13057	8.18201e-24	8.14367e-23	TRUE
ENSG00000123472.13	ATPAF1	7.70853	9.47349e-54	4.57113e-52	TRUE	8.39624	3.63574e-41	1.12524e-39	TRUE
ENSG00000159658.15	EFCAB14	6.54685	9.25294e-53	4.14301e-51	TRUE	5.49063	1.05984e-27	1.30286e-26	TRUE
ENSG00000123473.17	STIL	7.64384	1.99622e-51	8.28673e-50	TRUE	7.33852	1.74353e-44	7.13242e-43	TRUE
ENSG00000162368.14	CMPK1	7.50014	6.39495e-41	1.33477e-39	TRUE	8.44584	3.58693e-40	1.02652e-38	TRUE
ENSG00000185104.21	FAF1	4.93475	7.93792e-29	8.57655e-28	TRUE	4.9586	1.91762e-22	1.76292e-21	TRUE
ENSG00000123080.12	CDKN2C	5.73135	7.75932e-05	0.000273238	FALSE	6.81266	2.40692e-21	2.07028e-20	TRUE
ENSG00000123091.5	RNF11	9.31467	3.51131e-40	7.01475e-39	TRUE	8.31862	3.94411e-42	1.3211e-40	TRUE
ENSG00000085832.17	EPS15	6.59275	1.26128e-53	6.02214e-52	TRUE	6.86674	4.49972e-45	1.94055e-43	TRUE
ENSG00000117859.19	OSBPL9	5.76313	1.62792e-41	3.53267e-40	TRUE	5.03232	3.66315e-22	3.30283e-21	TRUE
ENSG00000078618.23	NRDC	4.6919	1.71262e-25	1.58845e-24	TRUE	4.95761	3.40353e-25	3.64417e-24	TRUE
ENSG00000169213.7	RAB3B	5.39874	2.63579e-32	3.42427e-31	TRUE	5.00528	8.21235e-21	6.86014e-20	TRUE
ENSG00000134717.18	BTF3L4	7.10066	7.21065e-52	3.0742e-50	TRUE	6.95871	1.29649e-44	5.34201e-43	TRUE
ENSG00000157077.16	ZFYVE9	5.18446	5.79858e-28	6.03458e-27	TRUE	5.78207	1.2548e-27	1.53755e-26	TRUE
ENSG00000134748.13	PRPF38A	7.94693	2.30633e-58	1.51347e-56	TRUE	7.29343	3.91346e-52	3.03484e-50	TRUE
ENSG00000134744.14	TUT4	4.77382	1.20042e-33	1.66951e-32	TRUE	5.30361	8.90355e-32	1.389e-30	TRUE
ENSG00000162377.6	COA7	7.84412	5.80191e-60	4.39851e-58	TRUE	8.32948	5.65297e-48	3.05895e-46	TRUE
ENSG00000162378.13	ZYG11B	7.88694	8.21102e-49	2.84431e-47	TRUE	7.53131	4.58283e-46	2.11509e-44	TRUE
ENSG00000058804.12	NDC1	8.29752	1.12739e-49	4.11012e-48	TRUE	9.44444	1.83765e-43	6.89855e-42	TRUE
ENSG00000116209.12	TMEM59	6.29792	3.0674e-26	2.94352e-25	TRUE	5.66731	2.53346e-21	2.17693e-20	TRUE
ENSG00000116205.14	TCEANC2	3.74998	3.15571e-16	1.9661e-15	TRUE	3.80615	3.78994e-14	2.22472e-13	TRUE
ENSG00000116221.15	MRPL37	5.61938	1.84634e-35	2.83405e-34	TRUE	5.43618	2.3899e-31	3.63901e-30	TRUE
ENSG00000157216.16	SSBP3	4.90128	7.77647e-26	7.32363e-25	TRUE	4.23056	7.2094e-16	4.63448e-15	TRUE
ENSG00000116133.13	DHCR24	6.43745	7.43999e-56	4.12356e-54	TRUE	6.39221	2.93501e-43	1.08513e-41	TRUE
ENSG00000162402.14	USP24	5.99691	8.9078e-54	4.31339e-52	TRUE	5.59059	1.05699e-45	4.74383e-44	TRUE
ENSG00000162409.12	PRKAA2	6.82759	1.64451e-50	6.38712e-49	TRUE	7.30659	6.19617e-53	5.21928e-51	TRUE
ENSG00000162601.11	MYSM1	6.85988	1.90093e-73	4.01879e-71	TRUE	6.89973	1.00092e-57	1.35298e-55	TRUE
ENSG00000177606.8	JUN	5.1398	1.11085e-37	1.93792e-36	TRUE	5.2885	8.03992e-32	1.25896e-30	TRUE
ENSG00000134709.13	HOOK1	5.63522	4.13528e-38	7.39339e-37	TRUE	6.40171	8.78168e-38	2.11795e-36	TRUE
ENSG00000162599.17	NFIA	5.07251	3.26759e-42	7.34338e-41	TRUE	4.89543	1.26072e-33	2.22704e-32	TRUE
ENSG00000132849.22	PATJ	4.20227	8.04425e-23	6.63303e-22	TRUE	3.51222	3.45303e-13	1.93495e-12	TRUE
ENSG00000162607.13	USP1	8.60739	3.34609e-68	4.83227e-66	TRUE	8.83097	4.77393e-59	7.52367e-57	TRUE
ENSG00000116641.18	DOCK7	4.60887	8.01038e-33	1.06887e-31	TRUE	4.72009	7.24971e-25	7.62871e-24	TRUE
ENSG00000079739.17	PGM1	5.59437	4.71548e-29	5.1546e-28	TRUE	5.29662	5.92283e-24	5.9348e-23	TRUE
ENSG00000158966.16	CACHD1	4.82992	4.43803e-35	6.66501e-34	TRUE	5.15081	2.2664e-25	2.45513e-24	TRUE
ENSG00000162437.15	RAVER2	7.41808	5.13483e-55	2.69654e-53	TRUE	6.32925	1.33354e-38	3.40086e-37	TRUE
ENSG00000162434.13	JAK1	5.01978	3.62197e-35	5.47745e-34	TRUE	4.50732	5.72351e-22	5.10933e-21	TRUE
ENSG00000162433.15	AK4	7.30325	4.04298e-68	5.77766e-66	TRUE	6.86852	6.81084e-43	2.43136e-41	TRUE
ENSG00000116675.16	DNAJC6	4.38005	3.21238e-24	2.80265e-23	TRUE	4.57796	4.47658e-16	2.90502e-15	TRUE
ENSG00000213625.9	LEPROT	5.89779	1.16772e-32	1.54294e-31	TRUE	6.34461	2.79818e-28	3.55611e-27	TRUE
ENSG00000198160.15	MIER1	6.77536	1.46152e-62	1.35007e-60	TRUE	6.62958	1.89151e-54	1.83252e-52	TRUE
ENSG00000116704.8	SLC35D1	6.6996	3.44165e-48	1.13196e-46	TRUE	6.57468	3.3018e-43	1.21287e-41	TRUE
ENSG00000142864.15	SERBP1	7.5098	1.72035e-106	7.83983e-103	TRUE	7.47952	9.1365e-69	3.32403e-66	TRUE
ENSG00000172380.6	GNG12	8.9616	5.94446e-50	2.21844e-48	TRUE	7.8466	6.59022e-50	4.21269e-48	TRUE
ENSG00000024526.17	DEPDC1	8.53957	3.80095e-54	1.89881e-52	TRUE	7.28304	7.68303e-56	8.42154e-54	TRUE
ENSG00000066557.6	LRRC40	6.59337	1.86006e-30	2.19662e-29	TRUE	6.08852	1.47414e-27	1.79986e-26	TRUE
ENSG00000116754.14	SRSF11	6.5781	1.34925e-66	1.7017e-64	TRUE	6.61718	2.49484e-51	1.7887e-49	TRUE
ENSG00000118454.13	ANKRD13C	8.91745	1.54874e-42	3.54661e-41	TRUE	7.16679	2.07645e-40	6.07983e-39	TRUE
ENSG00000132485.14	ZRANB2	7.94092	6.51252e-54	3.19503e-52	TRUE	7.13956	1.83673e-52	1.48849e-50	TRUE
ENSG00000162623.16	TYW3	6.68988	6.17185e-38	1.0925e-36	TRUE	6.30521	3.46545e-32	5.56408e-31	TRUE
ENSG00000117054.15	ACADM	5.19757	6.38159e-31	7.72534e-30	TRUE	5.03963	2.54786e-23	2.4656e-22	TRUE
ENSG00000137955.16	RABGGTB	5.30692	2.19205e-30	2.58051e-29	TRUE	6.03819	1.29056e-31	1.99349e-30	TRUE
ENSG00000142892.15	PIGK	6.75959	3.14518e-38	5.66023e-37	TRUE	6.23088	2.3122e-30	3.30443e-29	TRUE
ENSG00000036549.13	ZZZ3	6.92967	6.30521e-70	9.98463e-68	TRUE	7.72394	4.40963e-57	5.50382e-55	TRUE
ENSG00000077254.14	USP33	5.5496	1.58403e-27	1.6157e-26	TRUE	6.03747	2.27568e-34	4.22508e-33	TRUE
ENSG00000180488.16	MIGA1	6.05647	1.05748e-37	1.84874e-36	TRUE	5.72811	2.09851e-25	2.27831e-24	TRUE
ENSG00000162613.17	FUBP1	6.70413	8.68749e-59	5.8894e-57	TRUE	6.74449	1.10576e-48	6.43129e-47	TRUE
ENSG00000117114.21	ADGRL2	5.8776	7.8107e-51	3.1223e-49	TRUE	6.05298	2.26704e-40	6.62653e-39	TRUE
ENSG00000142875.20	PRKACB	6.92012	1.1335e-35	1.75829e-34	TRUE	6.49412	2.17952e-31	3.32904e-30	TRUE
ENSG00000117133.11	RPF1	6.33236	3.91019e-30	4.53799e-29	TRUE	6.97714	1.1943e-29	1.63507e-28	TRUE
ENSG00000174021.12	GNG5	5.45763	3.55271e-25	3.23946e-24	TRUE	5.68392	7.74702e-16	4.9726e-15	FALSE
ENSG00000285851.1	ENSG00000285851	6.35983	4.25733e-27	4.25775e-26	TRUE	6.88446	1.22816e-17	8.67625e-17	FALSE
ENSG00000117155.17	SSX2IP	6.94487	2.76475e-40	5.56396e-39	TRUE	6.20414	4.64714e-33	7.92723e-32	TRUE
ENSG00000162642.14	C1orf52	5.89864	2.43592e-32	3.17064e-31	TRUE	5.85793	2.20929e-18	1.62311e-17	TRUE
ENSG00000142867.14	BCL10	6.07647	6.2685e-35	9.34895e-34	TRUE	7.31868	5.46046e-27	6.45274e-26	TRUE
ENSG00000153904.21	DDAH1	8.221	2.19517e-59	1.56851e-57	TRUE	6.9343	2.34719e-35	4.72742e-34	TRUE
ENSG00000117174.11	ZNHIT6	5.3967	9.3609e-33	1.24249e-31	TRUE	5.23641	3.33661e-23	3.21524e-22	TRUE
ENSG00000097033.14	SH3GLB1	7.82458	4.59905e-60	3.53894e-58	TRUE	6.34844	9.60583e-42	3.12569e-40	TRUE
ENSG00000183291.18	SELENOF	6.6638	2.47782e-51	1.02136e-49	TRUE	7.78071	2.24077e-41	7.02401e-40	TRUE
ENSG00000153936.18	HS2ST1	6.51354	1.02633e-31	1.29599e-30	TRUE	6.64773	1.33976e-39	3.69801e-38	TRUE
ENSG00000065243.20	PKN2	7.42454	2.60067e-55	1.3943e-53	TRUE	7.5702	2.32314e-47	1.19472e-45	TRUE
ENSG00000213516.10	RBMXL1	7.79776	4.91328e-42	1.09578e-40	TRUE	8.39236	3.05511e-32	4.91679e-31	TRUE
ENSG00000197147.15	LRRC8B	7.73486	1.00708e-55	5.55165e-54	TRUE	7.94472	2.38602e-40	6.9624e-39	TRUE
ENSG00000171488.15	LRRC8C	5.48888	6.65615e-36	1.04556e-34	TRUE	6.39942	5.50621e-35	1.06569e-33	TRUE
ENSG00000171492.14	LRRC8D	5.54723	1.07895e-35	1.67495e-34	TRUE	6.30172	1.62634e-25	1.77925e-24	TRUE
ENSG00000162664.17	ZNF326	4.93854	1.31341e-37	2.28351e-36	TRUE	4.81121	1.16029e-33	2.05707e-32	TRUE
ENSG00000122482.22	ZNF644	8.61598	2.91064e-58	1.88589e-56	TRUE	8.79516	1.13545e-54	1.1321e-52	TRUE
ENSG00000097046.13	CDC7	7.44911	2.07901e-54	1.05924e-52	TRUE	7.47504	2.53325e-48	1.40869e-46	TRUE
ENSG00000069702.11	TGFBR3	5.02204	3.37511e-30	3.93147e-29	TRUE	4.56539	8.74175e-17	5.88734e-16	TRUE
ENSG00000122484.9	RPAP2	6.14005	7.17997e-52	3.0643e-50	TRUE	5.38659	2.03129e-29	2.75121e-28	TRUE
ENSG00000067208.16	EVI5	6.12461	4.0461e-42	9.06318e-41	TRUE	6.43873	1.97753e-36	4.31311e-35	TRUE
ENSG00000122406.14	RPL5	5.88664	8.50958e-57	5.07285e-55	TRUE	6.01238	1.08254e-57	1.45184e-55	TRUE
ENSG00000143033.18	MTF2	6.91317	1.80631e-48	6.10751e-47	TRUE	6.8964	5.46533e-32	8.65318e-31	TRUE
ENSG00000117500.13	TMED5	8.0286	1.4676e-61	1.2488e-59	TRUE	8.75663	2.301e-48	1.28581e-46	TRUE
ENSG00000122483.18	CCDC18	4.98079	2.39181e-26	2.30547e-25	FALSE	5.21113	2.75276e-20	2.23561e-19	TRUE
ENSG00000117505.13	DR1	7.70896	4.29987e-76	1.13777e-73	TRUE	7.0454	2.27243e-38	5.71853e-37	TRUE
ENSG00000137942.18	FNBP1L	6.88864	5.50202e-43	1.28875e-41	TRUE	5.70433	1.27105e-32	2.09892e-31	TRUE
ENSG00000067334.14	DNTTIP2	4.42204	3.95114e-25	3.59477e-24	TRUE	4.83672	7.07459e-24	7.06818e-23	TRUE
ENSG00000023909.10	GCLM	8.32579	1.39978e-23	1.19035e-22	TRUE	7.19053	4.63454e-28	5.80361e-27	TRUE
ENSG00000137962.13	ARHGAP29	5.00106	3.12605e-28	3.29086e-27	TRUE	4.82751	1.17617e-18	8.77487e-18	TRUE
ENSG00000117528.14	ABCD3	6.24694	9.28277e-33	1.23251e-31	TRUE	6.62215	1.07549e-33	1.9097e-32	TRUE
ENSG00000117519.16	CNN3	7.19309	3.15433e-40	6.32007e-39	TRUE	6.57856	6.27101e-39	1.64087e-37	TRUE
ENSG00000152078.10	TLCD4	7.31685	7.7153e-33	1.03174e-31	TRUE	6.38971	1.0944e-22	1.01954e-21	TRUE
ENSG00000117569.19	PTBP2	5.6705	1.10732e-38	2.04391e-37	TRUE	4.83879	3.15429e-21	2.69414e-20	TRUE
ENSG00000162688.17	AGL	5.59142	2.50138e-30	2.93538e-29	TRUE	5.66441	6.03565e-27	7.1079e-26	TRUE
ENSG00000117620.15	SLC35A3	4.66587	3.29946e-23	2.76906e-22	FALSE	4.60993	5.81768e-15	3.57261e-14	TRUE
ENSG00000283761.1	ENSG00000283761	6.77621	5.44843e-38	9.68079e-37	TRUE	7.05003	2.99332e-28	3.79705e-27	TRUE
ENSG00000156875.14	MFSD14A	8.023	1.97839e-30	2.33434e-29	TRUE	7.60991	1.05837e-26	1.22946e-25	TRUE
ENSG00000156876.10	SASS6	6.98669	1.98975e-53	9.40178e-52	TRUE	7.19312	4.42127e-38	1.08701e-36	TRUE
ENSG00000137992.15	DBT	4.99507	7.11148e-26	6.70661e-25	TRUE	5.29344	1.01546e-23	1.00514e-22	TRUE
ENSG00000162695.12	SLC30A7	8.23875	2.2958e-51	9.49192e-50	TRUE	7.08331	3.69689e-43	1.35364e-41	TRUE
ENSG00000198890.9	PRMT6	7.15395	6.72643e-43	1.56927e-41	TRUE	7.24364	3.07129e-36	6.59767e-35	TRUE
ENSG00000085491.17	SLC25A24	6.63776	1.60814e-37	2.78414e-36	TRUE	5.11599	1.99829e-19	1.55176e-18	TRUE
ENSG00000162636.16	FAM102B	6.25009	3.09161e-53	1.43276e-51	TRUE	6.01508	1.2589e-39	3.47764e-38	TRUE
ENSG00000134186.12	PRPF38B	4.39719	3.25394e-27	3.27181e-26	TRUE	3.93045	2.3988e-24	2.44813e-23	TRUE
ENSG00000116266.11	STXBP3	4.08395	1.97051e-19	1.41316e-18	FALSE	4.58854	1.30729e-17	9.20858e-17	TRUE
ENSG00000121957.15	GPSM2	5.41842	2.55087e-38	4.62109e-37	TRUE	4.80553	6.63444e-21	5.56925e-20	TRUE
ENSG00000121940.17	CLCC1	4.94605	2.57804e-30	3.02103e-29	TRUE	4.95431	1.37582e-25	1.51145e-24	TRUE
ENSG00000085433.17	WDR47	5.9782	5.2791e-42	1.17608e-40	TRUE	6.14938	7.81402e-32	1.22527e-30	TRUE
ENSG00000197780.11	TAF13	6.00829	1.38355e-31	1.73904e-30	TRUE	5.86699	1.11513e-30	1.61869e-29	TRUE
ENSG00000215717.7	TMEM167B	6.41114	1.20188e-42	2.76776e-41	TRUE	8.06482	6.0794e-41	1.84808e-39	TRUE
ENSG00000031698.13	SARS1	4.74862	8.88546e-24	7.61128e-23	TRUE	4.7282	9.12398e-22	8.02549e-21	TRUE
ENSG00000143126.8	CELSR2	2.6447	3.49797e-11	1.74024e-10	TRUE	2.52649	2.98755e-05	0.000104985	FALSE
ENSG00000134243.12	SORT1	5.88216	1.39613e-59	1.01888e-57	TRUE	6.07274	5.29049e-36	1.11547e-34	TRUE
ENSG00000143106.13	PSMA5	3.83302	2.01764e-18	1.38426e-17	FALSE	4.09957	2.02543e-15	1.27307e-14	TRUE
ENSG00000143028.9	SYPL2	4.52366	4.38757e-20	3.24199e-19	TRUE	4.02879	1.72705e-09	7.94719e-09	FALSE
ENSG00000065135.12	GNAI3	7.07295	4.98758e-63	4.77946e-61	TRUE	6.54365	3.10133e-47	1.5713e-45	TRUE
ENSG00000168710.18	AHCYL1	6.62874	1.70574e-53	8.07845e-52	TRUE	6.52817	9.79893e-31	1.42723e-29	TRUE
ENSG00000162775.17	RBM15	7.55882	3.62682e-55	1.91936e-53	TRUE	7.01954	1.53196e-44	6.2895e-43	TRUE
ENSG00000121931.16	LRIF1	6.95641	9.57062e-38	1.68107e-36	TRUE	7.84045	1.54052e-24	1.58975e-23	TRUE
ENSG00000156171.15	DRAM2	6.31224	2.83877e-28	2.99382e-27	TRUE	5.90447	2.33694e-19	1.80735e-18	TRUE
ENSG00000116455.14	WDR77	6.56651	7.06683e-31	8.53472e-30	TRUE	5.76834	1.04394e-24	1.08847e-23	TRUE
ENSG00000116459.11	ATP5PB	6.83457	4.5665e-45	1.22172e-43	TRUE	6.90796	4.2852e-43	1.56403e-41	TRUE
ENSG00000116473.15	RAP1A	7.29293	3.46314e-37	5.86689e-36	TRUE	6.33928	8.25586e-32	1.291e-30	TRUE
ENSG00000064703.13	DDX20	7.55464	2.10978e-53	9.92325e-52	TRUE	6.81795	3.3356e-42	1.1261e-40	TRUE
ENSG00000143079.15	CTTNBP2NL	7.02595	7.48384e-58	4.74408e-56	TRUE	6.93726	8.04346e-53	6.67666e-51	TRUE
ENSG00000116489.13	CAPZA1	7.82969	1.51318e-75	3.84061e-73	TRUE	7.94562	1.09334e-72	6.44676e-70	TRUE
ENSG00000155380.13	SLC16A1	6.78804	2.21414e-59	1.57931e-57	TRUE	7.47733	1.35421e-53	1.2252e-51	TRUE
ENSG00000198799.12	LRIG2	5.07757	7.8807e-34	1.11034e-32	TRUE	5.60481	3.34884e-28	4.23077e-27	TRUE
ENSG00000081026.19	MAGI3	5.91298	7.01816e-32	8.91431e-31	TRUE	6.00585	6.33146e-34	1.14505e-32	TRUE
ENSG00000081019.14	RSBN1	7.58946	3.53191e-54	1.76656e-52	TRUE	7.01008	1.63355e-46	7.86844e-45	TRUE
ENSG00000118655.7	DCLRE1B	6.66342	1.16811e-43	2.85341e-42	TRUE	6.81394	4.0495e-33	6.95225e-32	TRUE
ENSG00000163349.22	HIPK1	6.94764	8.89076e-69	1.33082e-66	TRUE	7.45305	5.32859e-64	1.21488e-61	TRUE
ENSG00000197323.12	TRIM33	7.40488	2.1452e-72	4.22996e-70	TRUE	7.92665	5.99432e-57	7.34767e-55	TRUE
ENSG00000116752.6	BCAS2	7.32233	1.49215e-38	2.74066e-37	TRUE	6.41717	2.97357e-35	5.92962e-34	TRUE
ENSG00000175984.15	DENND2C	5.05928	2.56249e-27	2.5899e-26	TRUE	4.71959	2.23443e-16	1.47349e-15	TRUE
ENSG00000213281.5	NRAS	9.3089	5.1155e-67	6.63946e-65	TRUE	7.81993	1.34906e-69	5.49244e-67	TRUE
ENSG00000009307.17	CSDE1	7.47502	1.5605e-99	3.20012e-96	TRUE	7.45904	9.53618e-97	8.1532e-93	TRUE
ENSG00000052723.12	SIKE1	8.96616	3.76257e-71	6.48395e-69	TRUE	7.87372	3.10573e-46	1.47109e-44	TRUE
ENSG00000173218.15	VANGL1	6.03265	2.0306e-46	5.88988e-45	TRUE	6.23115	3.10002e-35	6.1674e-34	TRUE
ENSG00000163399.16	ATP1A1	6.30627	2.85811e-60	2.22857e-58	TRUE	6.26588	4.53138e-46	2.09417e-44	TRUE
ENSG00000203865.12	ATP1A1-AS1	5.24954	6.79826e-35	1.01206e-33	TRUE	4.49464	1.59623e-24	1.64525e-23	TRUE
ENSG00000134247.10	PTGFRN	6.73631	3.26159e-44	8.23711e-43	TRUE	5.64723	1.81284e-32	2.95788e-31	TRUE
ENSG00000116830.12	TTF2	5.05688	6.5976e-35	9.83264e-34	TRUE	4.51929	1.68019e-20	1.37697e-19	TRUE
ENSG00000198162.12	MAN1A2	6.59424	1.04741e-55	5.76621e-54	TRUE	6.43293	1.84782e-48	1.04799e-46	TRUE
ENSG00000196505.11	GDAP2	6.9094	1.53639e-59	1.11529e-57	TRUE	7.1679	8.11242e-47	4.0092e-45	TRUE
ENSG00000065183.16	WDR3	4.90735	7.68452e-29	8.30495e-28	TRUE	5.21888	2.2223e-26	2.54097e-25	TRUE
ENSG00000116874.12	WARS2	5.99131	1.23831e-37	2.15569e-36	TRUE	6.47563	1.29725e-32	2.13908e-31	TRUE
ENSG00000231365.7	WARS2-AS1	5.36611	9.1906e-37	1.51565e-35	TRUE	4.92772	5.54701e-22	4.95435e-21	TRUE
ENSG00000143067.5	ZNF697	5.70565	1.07933e-31	1.36208e-30	TRUE	5.95687	4.66891e-31	6.95435e-30	TRUE
ENSG00000134250.21	NOTCH2	6.1285	3.69348e-65	4.09417e-63	TRUE	5.80846	1.56889e-42	5.41416e-41	TRUE
ENSG00000265808.4	SEC22B	5.90214	4.66716e-35	7.00398e-34	TRUE	5.12493	9.76183e-22	8.57551e-21	TRUE
ENSG00000171943.12	SRGAP2C	5.78881	1.48909e-31	1.8694e-30	TRUE	5.74274	2.35736e-26	2.6945e-25	TRUE
ENSG00000266338.7	NBPF15	4.34201	4.25429e-21	3.27857e-20	FALSE	4.05	2.83376e-13	1.59394e-12	TRUE
ENSG00000265491.5	RNF115	5.05624	5.75041e-34	8.16929e-33	TRUE	5.23034	2.50255e-25	2.70752e-24	TRUE
ENSG00000186141.9	POLR3C	6.13389	1.62107e-38	2.9708e-37	TRUE	5.16206	8.4306e-25	8.83328e-24	TRUE
ENSG00000265241.8	RBM8A	5.53183	8.94171e-27	8.83274e-26	TRUE	6.2489	1.13245e-31	1.75481e-30	TRUE
ENSG00000271601.4	LIX1L	7.4273	2.86801e-53	1.33215e-51	TRUE	6.87933	1.13279e-39	3.13433e-38	TRUE
ENSG00000131791.8	PRKAB2	7.55235	1.52282e-45	4.19738e-44	TRUE	7.72459	4.96228e-38	1.21478e-36	TRUE
ENSG00000116128.12	BCL9	5.76964	5.41014e-50	2.03011e-48	TRUE	5.29631	1.20802e-22	1.12264e-21	TRUE
ENSG00000178104.20	PDE4DIP	3.41253	2.18537e-15	1.30676e-14	TRUE	3.61915	1.37814e-14	8.2846e-14	TRUE
ENSG00000269713.8	NBPF9	5.73278	9.39828e-30	1.06806e-28	TRUE	5.00328	4.45026e-19	3.3836e-18	TRUE
ENSG00000203814.7	H2BC18	5.0365	1.75518e-29	1.95776e-28	TRUE	4.95212	1.18691e-25	1.30854e-24	TRUE
ENSG00000143368.10	SF3B4	6.1306	2.24261e-39	4.29004e-38	TRUE	6.04556	2.04448e-25	2.22177e-24	TRUE
ENSG00000264522.6	OTUD7B	5.12604	1.14895e-40	2.36681e-39	TRUE	4.75342	5.54843e-28	6.91512e-27	TRUE
ENSG00000143401.15	ANP32E	7.20464	5.90877e-56	3.27933e-54	TRUE	7.76253	2.34645e-60	3.93363e-58	TRUE
ENSG00000117362.13	APH1A	5.97848	2.07472e-35	3.17746e-34	TRUE	5.56965	1.10139e-25	1.21466e-24	TRUE
ENSG00000163125.16	RPRD2	6.6446	1.70776e-73	3.62912e-71	TRUE	6.42218	3.76175e-53	3.23237e-51	TRUE
ENSG00000143384.14	MCL1	9.13713	5.87111e-77	1.6839e-74	TRUE	8.09358	2.48642e-68	8.76629e-66	TRUE
ENSG00000143420.19	ENSA	5.59877	2.21634e-45	6.03592e-44	TRUE	5.74046	2.05444e-36	4.4723e-35	TRUE
ENSG00000143457.11	GOLPH3L	8.71976	1.45671e-43	3.53732e-42	TRUE	7.37808	3.58346e-40	1.02639e-38	TRUE
ENSG00000143437.21	ARNT	5.57335	1.79419e-44	4.59343e-43	TRUE	5.44462	8.48395e-29	1.10826e-27	TRUE
ENSG00000143418.20	CERS2	5.98933	5.41069e-51	2.19066e-49	TRUE	6.28858	1.02407e-40	3.06944e-39	TRUE
ENSG00000259357.2	ENSG00000259357	9.96406	1.90043e-12	1.00237e-11	TRUE	8.72159	3.17806e-19	2.43855e-18	TRUE
ENSG00000143363.17	PRUNE1	7.7687	4.97439e-43	1.1685e-41	TRUE	7.03765	4.90546e-33	8.35467e-32	TRUE
ENSG00000197622.13	CDC42SE1	7.13136	5.43443e-59	3.77136e-57	TRUE	6.62584	2.89817e-43	1.07267e-41	TRUE
ENSG00000143398.20	PIP5K1A	7.38836	7.29054e-78	2.26526e-75	TRUE	7.14806	1.65185e-59	2.63979e-57	TRUE
ENSG00000143393.17	PI4KB	4.2154	5.49318e-27	5.47635e-26	TRUE	4.33016	6.36267e-19	4.8024e-18	TRUE
ENSG00000143390.18	RFX5	5.28781	1.85495e-37	3.19391e-36	TRUE	5.97267	2.80384e-28	3.56197e-27	TRUE
ENSG00000143442.22	POGZ	6.27563	9.48229e-60	7.07103e-58	TRUE	6.03481	2.01712e-37	4.76404e-36	TRUE
ENSG00000143376.14	SNX27	6.18054	1.17781e-48	4.03228e-47	TRUE	5.72947	1.4967e-41	4.76588e-40	TRUE
ENSG00000143436.11	MRPL9	4.95419	1.04966e-23	8.95962e-23	FALSE	7.24207	2.22438e-19	1.72302e-18	TRUE
ENSG00000159445.13	THEM4	4.50888	1.162e-17	7.70917e-17	FALSE	4.4906	1.82632e-13	1.03734e-12	TRUE
ENSG00000160679.13	CHTOP	7.05478	1.60684e-39	3.10278e-38	TRUE	5.56568	9.93589e-28	1.22273e-26	TRUE
ENSG00000143553.11	SNAPIN	5.31181	2.36067e-22	1.91005e-21	FALSE	8.37213	4.32085e-16	2.80609e-15	TRUE
ENSG00000143621.17	ILF2	5.78235	6.10346e-47	1.82189e-45	TRUE	5.45661	2.01697e-36	4.39352e-35	TRUE
ENSG00000143624.14	INTS3	3.75385	3.90854e-16	2.42555e-15	TRUE	3.268	2.33823e-12	1.25989e-11	TRUE
ENSG00000143614.10	GATAD2B	6.61211	5.45144e-68	7.65703e-66	TRUE	6.57406	1.50193e-47	7.90221e-46	TRUE
ENSG00000198837.10	DENND4B	3.93523	9.51911e-20	6.91983e-19	TRUE	4.46297	1.12492e-17	7.96337e-17	TRUE
ENSG00000160741.17	CRTC2	5.04048	1.41946e-33	1.96747e-32	TRUE	4.08504	2.31203e-11	1.17767e-10	TRUE
ENSG00000177954.14	RPS27	5.57271	7.91644e-28	8.18052e-27	TRUE	5.42075	7.02887e-35	1.35121e-33	TRUE
ENSG00000143549.21	TPM3	6.14276	2.21498e-68	3.24447e-66	TRUE	5.89622	1.13266e-39	3.13433e-38	TRUE
ENSG00000143612.21	C1orf43	7.71795	4.60386e-56	2.57251e-54	TRUE	7.80502	5.92907e-62	1.12649e-59	TRUE
ENSG00000143569.19	UBAP2L	6.6762	3.83188e-79	1.3908e-76	TRUE	6.32776	1.72696e-51	1.2566e-49	TRUE
ENSG00000143515.20	ATP8B2	5.74227	2.5108e-47	7.69067e-46	TRUE	5.48246	2.96995e-37	6.89635e-36	TRUE
ENSG00000160714.10	UBE2Q1	5.31417	6.42287e-39	1.19631e-37	TRUE	5.32424	1.06831e-24	1.11218e-23	TRUE
ENSG00000160710.18	ADAR	6.02229	5.38679e-64	5.62173e-62	TRUE	7.01254	1.02227e-54	1.02825e-52	TRUE
ENSG00000163348.4	PYGO2	6.05467	8.86487e-39	1.6422e-37	TRUE	6.43726	1.67842e-19	1.30872e-18	TRUE
ENSG00000173207.13	CKS1B	6.83625	1.82272e-26	1.7694e-25	TRUE	5.69505	2.46057e-16	1.62137e-15	TRUE
ENSG00000160767.22	FAM189B	5.89354	7.07805e-43	1.64755e-41	TRUE	5.65587	5.00725e-30	7.03834e-29	TRUE
ENSG00000116539.14	ASH1L	5.99808	1.58483e-56	9.14206e-55	TRUE	5.87859	7.13528e-46	3.24494e-44	TRUE
ENSG00000163374.20	YY1AP1	5.4481	5.3506e-41	1.12193e-39	TRUE	5.63626	2.17263e-31	3.32001e-30	TRUE
ENSG00000132676.16	DAP3	5.97492	6.2479e-34	8.8699e-33	TRUE	5.17421	2.96253e-26	3.36709e-25	TRUE
ENSG00000116580.20	GON4L	4.33295	5.66131e-31	6.87776e-30	TRUE	4.45906	3.51539e-21	2.9936e-20	TRUE
ENSG00000143622.11	RIT1	6.90515	3.93917e-29	4.3175e-28	TRUE	6.06365	1.46501e-22	1.35594e-21	TRUE
ENSG00000132680.11	KHDC4	5.44175	5.74286e-35	8.58061e-34	TRUE	6.24564	3.82119e-35	7.52336e-34	TRUE
ENSG00000163479.14	SSR2	4.58339	6.42975e-25	5.79327e-24	TRUE	4.57603	5.32302e-20	4.26928e-19	TRUE
ENSG00000160803.8	UBQLN4	5.89432	4.82055e-47	1.44949e-45	TRUE	5.99305	7.57276e-36	1.58204e-34	TRUE
ENSG00000254726.3	MEX3A	4.77468	2.63523e-21	2.04699e-20	TRUE	4.48303	3.24825e-14	1.91397e-13	FALSE
ENSG00000160785.14	SLC25A44	6.2107	1.51407e-50	5.89726e-49	TRUE	6.11381	8.02485e-37	1.80673e-35	TRUE
ENSG00000198952.8	SMG5	4.89024	7.08338e-31	8.54967e-30	TRUE	5.00267	1.50184e-30	2.16807e-29	TRUE
ENSG00000163468.15	CCT3	6.11952	2.99412e-52	1.30778e-50	TRUE	6.82059	6.1415e-57	7.47449e-55	TRUE
ENSG00000116604.19	MEF2D	4.1489	2.75766e-26	2.64878e-25	TRUE	4.00645	2.88074e-13	1.61984e-12	TRUE
ENSG00000183856.11	IQGAP3	4.17516	9.03954e-25	8.08258e-24	TRUE	4.11657	7.49476e-17	5.05748e-16	TRUE
ENSG00000143319.17	ISG20L2	7.05555	1.29249e-51	5.41474e-50	TRUE	6.70187	2.17925e-46	1.03945e-44	TRUE
ENSG00000143321.19	HDGF	7.04356	4.58031e-55	2.41151e-53	TRUE	6.25927	5.58957e-50	3.60675e-48	TRUE
ENSG00000143294.15	PRCC	4.3316	1.62985e-18	1.12461e-17	TRUE	3.99352	2.6093e-14	1.54467e-13	FALSE
ENSG00000132694.19	ARHGEF11	3.68461	3.91896e-22	3.13992e-21	TRUE	3.16666	1.77674e-09	8.17031e-09	TRUE
ENSG00000117036.12	ETV3	6.67868	2.98689e-47	9.11491e-46	TRUE	6.98132	6.62819e-50	4.22906e-48	TRUE
ENSG00000183853.18	KIRREL1	4.08778	2.18921e-24	1.92555e-23	TRUE	4.06377	2.91287e-16	1.91057e-15	TRUE
ENSG00000158710.15	TAGLN2	5.70475	1.82733e-25	1.69255e-24	TRUE	6.35728	1.83751e-35	3.72722e-34	TRUE
ENSG00000143315.8	PIGM	5.47923	6.65997e-32	8.46458e-31	TRUE	5.48268	9.98061e-20	7.8683e-19	TRUE
ENSG00000162734.13	PEA15	6.38847	9.69413e-54	4.66661e-52	TRUE	6.2112	1.72751e-34	3.23013e-33	TRUE
ENSG00000162735.19	PEX19	7.1517	4.72635e-43	1.11278e-41	TRUE	6.33773	3.57812e-36	7.66237e-35	TRUE
ENSG00000122218.17	COPA	4.97715	1.7404e-40	3.54952e-39	TRUE	4.78093	1.56323e-26	1.80307e-25	TRUE
ENSG00000162738.7	VANGL2	5.66626	2.00323e-33	2.76169e-32	TRUE	4.94203	3.09873e-17	2.13872e-16	TRUE
ENSG00000158796.17	DEDD	4.58768	3.02338e-24	2.64e-23	TRUE	4.85087	4.23593e-17	2.90175e-16	TRUE
ENSG00000143222.12	UFC1	5.90611	4.26199e-20	3.15127e-19	FALSE	5.26491	4.7508e-19	3.6057e-18	TRUE
ENSG00000158850.15	B4GALT3	6.0188	1.50497e-38	2.76298e-37	TRUE	5.95989	3.64561e-23	3.50018e-22	TRUE
ENSG00000143252.16	SDHC	5.44984	8.46145e-30	9.63191e-29	TRUE	6.03562	3.15436e-22	2.85386e-21	TRUE
ENSG00000118217.7	ATF6	5.80303	8.80134e-41	1.82404e-39	TRUE	5.25047	5.91082e-29	7.81384e-28	TRUE
ENSG00000152332.16	UHMK1	7.75742	8.37602e-72	1.57584e-69	TRUE	8.10618	8.54339e-73	5.21742e-70	TRUE
ENSG00000117143.14	UAP1	5.82244	3.848e-34	5.51247e-33	TRUE	6.92836	3.76458e-32	6.02456e-31	TRUE
ENSG00000185630.19	PBX1	4.83983	9.59084e-31	1.15051e-29	TRUE	5.28323	1.53067e-29	2.08556e-28	TRUE
ENSG00000143149.13	ALDH9A1	5.70785	4.95562e-32	6.35156e-31	TRUE	7.03059	3.11833e-26	3.53945e-25	TRUE
ENSG00000143183.18	TMCO1	6.76889	1.40487e-35	2.17023e-34	TRUE	6.44371	6.63106e-23	6.26625e-22	TRUE
ENSG00000143179.16	UCK2	6.39047	1.45199e-40	2.97017e-39	TRUE	6.36414	2.37504e-38	5.97236e-37	TRUE
ENSG00000143157.12	POGK	8.59663	1.04119e-72	2.10362e-70	TRUE	7.41305	8.9504e-58	1.2195e-55	TRUE
ENSG00000152382.6	TADA1	7.17934	2.07336e-33	2.8555e-32	TRUE	6.93487	9.50285e-26	1.05004e-24	TRUE
ENSG00000143195.13	ILDR2	4.93256	1.00666e-26	9.91526e-26	TRUE	3.81113	7.78932e-12	4.07819e-11	TRUE
ENSG00000143190.23	POU2F1	7.15279	6.36736e-78	2.00885e-75	TRUE	7.07957	6.25669e-59	9.68201e-57	TRUE
ENSG00000143162.9	CREG1	7.40413	1.88144e-35	2.88685e-34	TRUE	7.97015	1.36497e-24	1.41115e-23	TRUE
ENSG00000197965.12	MPZL1	6.77518	1.77926e-55	9.67833e-54	TRUE	6.78031	1.36658e-47	7.21229e-46	TRUE
ENSG00000143164.16	DCAF6	5.52597	5.9288e-38	1.05084e-36	TRUE	6.03489	2.21328e-32	3.59411e-31	TRUE
ENSG00000143155.13	TIPRL	6.58302	5.7486e-37	9.62338e-36	TRUE	6.25806	1.74214e-27	2.11951e-26	TRUE
ENSG00000213064.10	SFT2D2	7.27364	8.21135e-74	1.78191e-71	TRUE	7.25555	1.3128e-61	2.40088e-59	TRUE
ENSG00000214262.4	ANKRD36BP1	8.67433	1.48902e-20	1.12242e-19	TRUE	8.22825	8.35367e-20	6.61466e-19	TRUE
ENSG00000143153.14	ATP1B1	3.90854	2.20691e-17	1.44753e-16	FALSE	6.05355	1.53108e-20	1.25868e-19	TRUE
ENSG00000117475.14	BLZF1	7.29669	1.74738e-30	2.06772e-29	TRUE	7.56331	7.89518e-21	6.60326e-20	TRUE
ENSG00000117479.15	SLC19A2	7.22624	4.0083e-24	3.48593e-23	FALSE	6.05589	3.219e-20	2.60683e-19	TRUE
ENSG00000117523.18	PRRC2C	7.30816	6.81867e-99	1.33172e-95	TRUE	7.00819	1.79613e-63	4.01476e-61	TRUE
ENSG00000094975.14	SUCO	7.01068	4.41433e-42	9.86645e-41	TRUE	6.35529	1.98318e-37	4.68714e-36	TRUE
ENSG00000117592.9	PRDX6	7.48583	1.48267e-50	5.79144e-49	TRUE	7.23708	5.1873e-41	1.58961e-39	TRUE
ENSG00000076321.11	KLHL20	4.53545	1.37369e-26	1.34272e-25	TRUE	4.95757	2.36107e-17	1.63852e-16	TRUE
ENSG00000120334.16	CENPL	6.17245	1.43865e-31	1.80663e-30	TRUE	5.47043	1.36644e-21	1.18999e-20	TRUE
ENSG00000117593.12	DARS2	6.44212	1.0547e-37	1.84467e-36	TRUE	5.831	1.71964e-28	2.20841e-27	TRUE
ENSG00000234741.9	GAS5	4.84744	3.25736e-25	2.97544e-24	FALSE	4.75793	5.00932e-22	4.48465e-21	TRUE
ENSG00000185278.16	ZBTB37	5.64322	1.0963e-42	2.52889e-41	TRUE	5.46226	2.87731e-31	4.35788e-30	TRUE
ENSG00000135870.12	RC3H1	6.70253	1.44433e-58	9.53906e-57	TRUE	6.9216	5.05349e-44	1.98649e-42	TRUE
ENSG00000152061.24	RABGAP1L	4.55771	7.61389e-27	7.54473e-26	TRUE	4.71562	2.83328e-23	2.73948e-22	TRUE
ENSG00000116161.18	CACYBP	5.75039	1.59168e-36	2.57825e-35	TRUE	5.76766	9.93973e-32	1.54583e-30	TRUE
ENSG00000120333.4	MRPS14	6.28209	3.50791e-25	3.20075e-24	FALSE	6.75613	8.83518e-23	8.28047e-22	TRUE
ENSG00000075391.18	RASAL2	5.17939	7.88531e-35	1.1705e-33	TRUE	5.05281	2.50363e-28	3.18888e-27	TRUE
ENSG00000116191.19	RALGPS2	6.84338	2.03978e-42	4.64259e-41	TRUE	6.4935	5.35212e-34	9.72567e-33	TRUE
ENSG00000116199.12	FAM20B	8.72002	2.07648e-47	6.43239e-46	TRUE	6.79708	5.04598e-50	3.26833e-48	TRUE
ENSG00000143322.21	ABL2	6.54974	1.03194e-70	1.71352e-68	TRUE	7.57151	3.37992e-55	3.50272e-53	TRUE
ENSG00000057252.13	SOAT1	6.62978	3.81257e-38	6.83131e-37	TRUE	5.84392	2.90195e-31	4.39326e-30	TRUE
ENSG00000169905.13	TOR1AIP2	7.38878	3.30401e-78	1.07548e-75	TRUE	6.90656	1.32801e-55	1.43723e-53	TRUE
ENSG00000143337.19	TOR1AIP1	7.2861	1.1237e-37	1.95951e-36	TRUE	6.02582	1.21611e-28	1.57537e-27	TRUE
ENSG00000135837.16	CEP350	6.86446	4.9821e-66	5.88864e-64	TRUE	6.66052	1.94802e-54	1.88193e-52	TRUE
ENSG00000143324.14	XPR1	6.85716	6.31754e-51	2.54776e-49	TRUE	6.27882	6.75297e-37	1.52944e-35	TRUE
ENSG00000135823.14	STX6	6.89837	3.55938e-45	9.59163e-44	TRUE	6.34782	7.7721e-36	1.62171e-34	TRUE
ENSG00000135821.19	GLUL	7.40479	3.55713e-80	1.50404e-77	TRUE	7.46836	3.69245e-65	9.28517e-63	TRUE
ENSG00000135829.17	DHX9	6.45865	1.89845e-52	8.36339e-51	TRUE	6.07762	6.28076e-45	2.66496e-43	TRUE
ENSG00000135862.6	LAMC1	5.5985	4.30609e-45	1.15356e-43	TRUE	5.60872	6.43629e-29	8.49536e-28	TRUE
ENSG00000116698.22	SMG7	7.21096	7.0314e-75	1.67666e-72	TRUE	6.83909	3.95254e-53	3.38779e-51	TRUE
ENSG00000162704.16	ARPC5	5.84802	5.94124e-50	2.21844e-48	TRUE	6.12857	4.12492e-38	1.01561e-36	TRUE
ENSG00000198860.14	TSEN15	5.23674	1.86856e-29	2.07633e-28	TRUE	5.34791	1.32707e-22	1.23127e-21	TRUE
ENSG00000116667.15	C1orf21	4.67295	2.55291e-28	2.69789e-27	TRUE	4.8544	4.68781e-22	4.20453e-21	TRUE
ENSG00000116406.20	EDEM3	5.88353	2.81304e-43	6.7e-42	TRUE	5.84921	3.75785e-35	7.40292e-34	TRUE
ENSG00000121481.11	RNF2	8.31151	1.63143e-54	8.34306e-53	TRUE	7.17806	1.94052e-38	4.90495e-37	TRUE
ENSG00000121486.12	TRMT1L	5.27223	1.9292e-26	1.87011e-25	TRUE	7.04276	2.03555e-30	2.92004e-29	TRUE
ENSG00000116679.16	IVNS1ABP	7.39163	5.27611e-49	1.85428e-47	TRUE	6.38963	2.74678e-39	7.38499e-38	TRUE
ENSG00000047410.14	TPR	5.90725	1.39335e-56	8.07159e-55	TRUE	5.21998	1.37983e-32	2.26543e-31	TRUE
ENSG00000157181.16	ODR4	6.3952	1.56408e-35	2.41071e-34	TRUE	6.92752	8.71469e-29	1.13797e-27	TRUE
ENSG00000116750.14	UCHL5	7.25378	1.00708e-43	2.46446e-42	TRUE	7.07172	1.80138e-42	6.19771e-41	TRUE
ENSG00000116747.13	RO60	8.40374	1.09745e-75	2.84878e-73	TRUE	8.81976	6.46745e-61	1.16411e-58	TRUE
ENSG00000023572.10	GLRX2	6.05645	4.09614e-23	3.4231e-22	FALSE	5.61349	7.87644e-22	6.95678e-21	TRUE
ENSG00000134371.14	CDC73	6.33867	4.06527e-41	8.59448e-40	TRUE	6.03752	1.64159e-30	2.36482e-29	TRUE
ENSG00000066279.19	ASPM	6.62561	6.36325e-39	1.18574e-37	TRUE	6.2978	1.36903e-34	2.5725e-33	TRUE
ENSG00000177888.8	ZBTB41	7.01785	3.28296e-42	7.37389e-41	TRUE	7.04716	4.47811e-33	7.64969e-32	TRUE
ENSG00000213047.13	DENND1B	5.92875	3.29079e-36	5.25989e-35	TRUE	5.41496	7.71916e-25	8.10772e-24	TRUE
ENSG00000151414.15	NEK7	7.64676	2.6183e-09	1.19133e-08	TRUE	7.80751	5.66346e-39	1.48645e-37	TRUE
ENSG00000162702.8	ZNF281	7.7089	4.01471e-66	4.8146e-64	TRUE	8.82319	7.42802e-49	4.38392e-47	TRUE
ENSG00000118193.12	KIF14	6.19334	4.82385e-38	8.58332e-37	TRUE	6.20549	1.46424e-30	2.11558e-29	TRUE
ENSG00000118200.15	CAMSAP2	6.9853	1.86643e-63	1.84903e-61	TRUE	6.58882	3.21591e-36	6.89535e-35	TRUE
ENSG00000134369.16	NAV1	3.18015	1.5776e-18	1.08947e-17	TRUE	3.36991	2.80451e-11	1.42007e-10	TRUE
ENSG00000198700.10	IPO9	5.92237	1.00525e-48	3.46175e-47	TRUE	5.9601	3.83841e-42	1.28696e-40	TRUE
ENSG00000134375.11	TIMM17A	6.56078	1.28259e-36	2.09327e-35	TRUE	6.64484	2.57564e-35	5.16927e-34	TRUE
ENSG00000077157.22	PPP1R12B	4.03235	7.51542e-25	6.7448e-24	TRUE	3.87776	4.2987e-17	2.94258e-16	TRUE
ENSG00000117139.18	KDM5B	5.29633	1.68331e-43	4.07072e-42	TRUE	5.67103	3.04128e-38	7.56227e-37	TRUE
ENSG00000183155.5	RABIF	6.99971	3.51395e-31	4.31759e-30	TRUE	6.04683	1.45258e-19	1.13547e-18	TRUE
ENSG00000117153.16	KLHL12	5.93599	8.70842e-27	8.60851e-26	TRUE	6.09103	9.58692e-31	1.39993e-29	TRUE
ENSG00000159346.13	ADIPOR1	7.72401	4.46383e-73	9.29337e-71	TRUE	6.91684	4.31671e-45	1.8687e-43	TRUE
ENSG00000163444.12	TMEM183A	6.18824	2.925e-47	8.93934e-46	TRUE	6.61956	1.42051e-36	3.13016e-35	TRUE
ENSG00000159388.6	BTG2	5.39865	9.87607e-30	1.11987e-28	TRUE	5.85371	3.22072e-23	3.10532e-22	TRUE
ENSG00000058668.15	ATP2B4	4.15379	1.8912e-22	1.5387e-21	TRUE	4.26628	1.08673e-15	6.92989e-15	TRUE
ENSG00000058673.17	ZC3H11A	7.45726	6.43159e-55	3.35604e-53	TRUE	6.85695	1.15248e-44	4.77743e-43	TRUE
ENSG00000257315.3	ZBED6	6.94709	3.83455e-54	1.91326e-52	TRUE	6.77417	4.43272e-45	1.91407e-43	TRUE
ENSG00000158615.10	PPP1R15B	7.76341	5.12543e-79	1.84399e-76	TRUE	7.77528	1.33547e-61	2.42934e-59	TRUE
ENSG00000198625.14	MDM4	7.08025	2.48962e-58	1.63114e-56	TRUE	6.1665	4.8213e-45	2.07401e-43	TRUE
ENSG00000117222.14	RBBP5	6.41385	5.79503e-38	1.02802e-36	TRUE	6.72646	1.36841e-34	2.5725e-33	TRUE
ENSG00000133059.17	DSTYK	5.18096	5.62859e-33	7.56889e-32	TRUE	5.4182	1.00484e-26	1.17085e-25	TRUE
ENSG00000158711.14	ELK4	6.93317	3.4036e-52	1.48033e-50	TRUE	6.64359	2.91961e-40	8.44737e-39	TRUE
ENSG00000069275.13	NUCKS1	8.90848	2.00803e-122	4.11787e-118	TRUE	8.94562	8.16822e-108	1.39673e-103	TRUE
ENSG00000117280.13	RAB29	6.99952	2.05385e-31	2.55805e-30	TRUE	7.78883	1.6731e-25	1.82982e-24	TRUE
ENSG00000133065.11	SLC41A1	6.30662	6.17899e-45	1.63817e-43	TRUE	6.14419	1.29541e-37	3.09371e-36	TRUE
ENSG00000266028.8	SRGAP2	5.15972	8.50074e-32	1.07575e-30	TRUE	5.19481	2.15579e-27	2.60515e-26	TRUE
ENSG00000266094.8	RASSF5	5.12543	6.77933e-24	5.83276e-23	TRUE	5.77904	2.80496e-18	2.04884e-17	TRUE
ENSG00000143486.16	EIF2D	4.38906	1.30972e-21	1.02788e-20	FALSE	4.21951	3.84692e-16	2.50735e-15	TRUE
ENSG00000143479.18	DYRK3	5.30244	3.39775e-31	4.17857e-30	TRUE	5.40101	3.34656e-23	3.22301e-22	TRUE
ENSG00000162889.11	MAPKAPK2	6.04188	1.55327e-38	2.8491e-37	TRUE	6.20441	3.21698e-28	4.0687e-27	TRUE
ENSG00000123836.15	PFKFB2	3.99058	3.49347e-22	2.80558e-21	FALSE	4.6165	1.42304e-19	1.11365e-18	TRUE
ENSG00000180667.11	YOD1	8.99056	3.76924e-66	4.56023e-64	TRUE	9.47489	8.53589e-58	1.17236e-55	TRUE
ENSG00000196352.18	CD55	5.30544	2.11323e-29	2.34376e-28	TRUE	5.09232	3.27638e-19	2.50837e-18	TRUE
ENSG00000117335.21	CD46	5.70946	1.13962e-30	1.3615e-29	TRUE	5.39174	2.44859e-23	2.37144e-22	TRUE
ENSG00000117597.18	UTP25	6.54042	3.07211e-53	1.42533e-51	TRUE	5.81333	3.81981e-36	8.1646e-35	TRUE
ENSG00000082497.12	SERTAD4	6.05343	1.70216e-30	2.01711e-29	TRUE	6.05494	2.38034e-23	2.30806e-22	TRUE
ENSG00000117625.14	RCOR3	5.15338	2.33188e-33	3.20508e-32	TRUE	4.91003	2.80662e-21	2.4044e-20	TRUE
ENSG00000170385.10	SLC30A1	7.14959	7.94962e-30	9.06438e-29	TRUE	8.13281	1.99646e-24	2.04544e-23	TRUE
ENSG00000123684.13	LPGAT1	7.46933	7.70131e-73	1.57931e-70	TRUE	8.01541	1.28307e-61	2.35912e-59	TRUE
ENSG00000143493.13	INTS7	7.25387	1.46485e-52	6.49509e-51	TRUE	6.18488	1.06358e-28	1.38145e-27	TRUE
ENSG00000143476.18	DTL	8.24901	1.68118e-69	2.61182e-67	TRUE	8.60294	4.45541e-71	2.17672e-68	TRUE
ENSG00000066027.12	PPP2R5A	6.39508	8.30729e-34	1.16843e-32	TRUE	6.12865	3.55847e-30	5.03709e-29	TRUE
ENSG00000162772.17	ATF3	6.61741	5.17042e-61	4.26679e-59	TRUE	6.17748	1.93194e-48	1.09388e-46	TRUE
ENSG00000117697.15	NSL1	6.17456	4.18096e-52	1.81458e-50	TRUE	5.91621	9.48797e-34	1.69e-32	TRUE
ENSG00000162769.13	FLVCR1	5.85605	1.10376e-34	1.62781e-33	TRUE	7.02738	6.52922e-32	1.02805e-30	TRUE
ENSG00000143494.16	VASH2	5.19388	5.3079e-26	5.03465e-25	TRUE	4.40454	3.34619e-11	1.69084e-10	TRUE
ENSG00000174606.14	ANGEL2	6.17653	3.19751e-40	6.40033e-39	TRUE	6.85835	3.98732e-29	5.31835e-28	TRUE
ENSG00000136643.12	RPS6KC1	5.04442	5.36822e-29	5.8572e-28	TRUE	7.82635	2.95892e-25	3.18916e-24	TRUE
ENSG00000117707.16	PROX1	6.30872	2.09781e-37	3.59548e-36	TRUE	4.96047	1.64281e-18	1.21633e-17	TRUE
ENSG00000152104.12	PTPN14	5.38234	4.42018e-49	1.55613e-47	TRUE	5.86774	1.04254e-42	3.66808e-41	TRUE
ENSG00000117724.14	CENPF	4.8602	8.2865e-41	1.72082e-39	TRUE	4.89071	2.67095e-33	4.62032e-32	TRUE
ENSG00000136636.13	KCTD3	6.9729	9.11531e-49	3.14693e-47	TRUE	7.26906	3.81105e-41	1.17736e-39	TRUE
ENSG00000092978.11	GPATCH2	5.77476	4.92463e-37	8.28121e-36	TRUE	6.50291	4.78409e-27	5.66716e-26	TRUE
ENSG00000067533.6	RRP15	7.09903	1.25779e-50	4.95077e-49	TRUE	6.39971	3.03155e-40	8.74166e-39	TRUE
ENSG00000136628.18	EPRS1	6.08992	1.73853e-37	2.99975e-36	TRUE	6.18855	2.96679e-38	7.38974e-37	TRUE
ENSG00000067704.10	IARS2	5.95438	4.82967e-37	8.1282e-36	TRUE	6.63691	3.82479e-35	7.52612e-34	TRUE
ENSG00000118873.17	RAB3GAP2	4.80203	2.60626e-31	3.22746e-30	TRUE	4.45349	3.93641e-21	3.34463e-20	TRUE
ENSG00000116141.17	MARK1	5.08233	2.20968e-32	2.8789e-31	TRUE	4.53771	3.58598e-17	2.46655e-16	TRUE
ENSG00000162817.7	C1orf115	5.20809	2.40466e-25	2.21579e-24	FALSE	5.81496	6.37903e-23	6.03642e-22	TRUE
ENSG00000186205.14	MTARC1	4.14436	1.25161e-21	9.83209e-21	TRUE	4.64387	2.97488e-15	1.85484e-14	TRUE
ENSG00000154305.18	MIA3	5.1021	2.6988e-36	4.32885e-35	TRUE	5.37971	4.89832e-26	5.50501e-25	TRUE
ENSG00000186063.13	AIDA	6.24993	3.01231e-35	4.56905e-34	TRUE	7.03781	2.97035e-37	6.89635e-36	TRUE
ENSG00000162819.12	BROX	8.67701	8.61357e-53	3.86941e-51	TRUE	7.91189	8.88907e-47	4.38037e-45	TRUE
ENSG00000162909.18	CAPN2	4.28529	6.54561e-29	7.1078e-28	TRUE	4.48744	3.82017e-23	3.6616e-22	TRUE
ENSG00000143514.17	TP53BP2	6.09054	7.62868e-48	2.43299e-46	TRUE	6.76707	1.44793e-41	4.61488e-40	TRUE
ENSG00000143756.12	FBXO28	8.23763	1.18172e-81	5.702e-79	TRUE	8.3919	4.08867e-72	2.19004e-69	TRUE
ENSG00000143753.13	DEGS1	7.74179	7.2096e-43	1.67532e-41	TRUE	7.91161	5.02977e-33	8.5615e-32	TRUE
ENSG00000143748.18	NVL	5.72572	2.47395e-39	4.72597e-38	TRUE	5.00277	5.05033e-30	7.09598e-29	TRUE
ENSG00000143771.12	CNIH4	4.94349	5.47565e-29	5.97124e-28	TRUE	5.50016	1.26509e-20	1.04504e-19	TRUE
ENSG00000162923.17	WDR26	6.34865	8.79943e-61	7.07647e-59	TRUE	6.76293	2.89675e-57	3.72429e-55	TRUE
ENSG00000185842.16	DNAH14	2.96946	1.54184e-11	7.80513e-11	FALSE	3.22392	1.54378e-11	7.95837e-11	TRUE
ENSG00000143815.15	LBR	7.76115	1.20408e-61	1.03314e-59	TRUE	6.06825	4.61812e-42	1.53484e-40	TRUE
ENSG00000154380.19	ENAH	6.80117	2.5985e-74	5.85577e-72	TRUE	6.93646	2.29184e-70	1.04505e-67	TRUE
ENSG00000143742.14	SRP9	8.36047	1.51699e-75	3.84061e-73	TRUE	8.14475	2.3186e-69	9.01067e-67	TRUE
ENSG00000143751.10	SDE2	6.28424	1.68072e-55	9.15444e-54	TRUE	7.37399	8.82827e-52	6.63556e-50	TRUE
ENSG00000163041.13	H3-3A	4.9862	1.15328e-24	1.02493e-23	TRUE	4.87185	1.47546e-21	1.282e-20	TRUE
ENSG00000182827.9	ACBD3	7.47972	6.68436e-61	5.46121e-59	TRUE	6.84463	1.30708e-50	8.76488e-49	TRUE
ENSG00000183814.16	LIN9	6.28788	3.00938e-41	6.40845e-40	TRUE	6.61324	1.38962e-33	2.44715e-32	TRUE
ENSG00000143799.14	PARP1	3.65879	3.22973e-25	2.95152e-24	TRUE	4.00609	1.93451e-25	2.10628e-24	TRUE
ENSG00000143776.20	CDC42BPA	5.41492	2.07346e-45	5.66184e-44	TRUE	5.005	7.3654e-33	1.23778e-31	TRUE
ENSG00000181450.18	ZNF678	7.8989	5.28597e-63	5.04183e-61	TRUE	7.32001	1.58453e-49	9.79915e-48	TRUE
ENSG00000143740.15	SNAP47	3.07736	4.75811e-15	2.81154e-14	FALSE	3.63821	2.18172e-13	1.2349e-12	TRUE
ENSG00000143761.16	ARF1	7.67971	1.34544e-67	1.8394e-65	TRUE	7.72248	3.02139e-72	1.66659e-69	TRUE
ENSG00000168159.15	RNF187	4.58402	7.23488e-26	6.82141e-25	TRUE	4.5524	4.57913e-20	3.68215e-19	TRUE
ENSG00000116574.6	RHOU	7.27869	7.526e-50	2.78333e-48	TRUE	8.02622	5.3853e-33	9.14459e-32	TRUE
ENSG00000168118.12	RAB4A	6.79907	9.95686e-35	1.47108e-33	TRUE	6.85615	3.26858e-35	6.47638e-34	TRUE
ENSG00000154429.11	CCSAP	7.50516	2.38033e-64	2.50969e-62	TRUE	7.97729	6.16884e-56	6.84961e-54	TRUE
ENSG00000069248.12	NUP133	5.68418	3.62323e-35	5.47745e-34	TRUE	6.8366	5.77532e-42	1.91016e-40	TRUE
ENSG00000135776.5	ABCB10	5.27919	5.33492e-24	4.62007e-23	TRUE	6.5447	6.57934e-25	6.94895e-24	TRUE
ENSG00000135801.10	TAF5L	6.98154	3.22714e-64	3.38511e-62	TRUE	6.51741	2.24705e-46	1.07029e-44	TRUE
ENSG00000135763.10	URB2	5.99504	1.93495e-31	2.41509e-30	TRUE	7.37127	5.43988e-30	7.62453e-29	TRUE
ENSG00000143641.10	GALNT2	4.47626	4.21421e-24	3.66268e-23	TRUE	4.2418	2.59176e-15	1.6201e-14	TRUE
ENSG00000119280.17	C1orf198	6.88876	8.116e-50	2.99883e-48	TRUE	6.49534	2.26965e-37	5.33469e-36	TRUE
ENSG00000173409.14	ARV1	5.78159	6.3947e-24	5.51108e-23	TRUE	5.61638	8.42938e-23	7.91057e-22	TRUE
ENSG00000182118.8	FAM89A	5.68648	5.07249e-31	6.18256e-30	TRUE	5.6138	1.9138e-19	1.48851e-18	TRUE
ENSG00000116906.13	GNPAT	5.39969	4.86283e-36	7.68571e-35	TRUE	5.44114	3.46724e-25	3.70666e-24	TRUE
ENSG00000116903.7	EXOC8	7.67242	1.44085e-55	7.87934e-54	TRUE	8.68728	1.80856e-39	4.94016e-38	TRUE
ENSG00000010072.16	SPRTN	7.46793	6.25928e-39	1.16796e-37	TRUE	6.4852	4.90866e-29	6.51421e-28	TRUE
ENSG00000135766.9	EGLN1	8.01493	4.79711e-43	1.1275e-41	TRUE	8.2861	4.27959e-37	9.81608e-36	TRUE
ENSG00000287856.1	ENSG00000287856	7.51065	2.19547e-44	5.59981e-43	TRUE	8.04185	1.05059e-34	1.99384e-33	TRUE
ENSG00000116918.15	TSNAX	5.48952	2.52579e-29	2.79e-28	TRUE	6.54033	4.02089e-33	6.90659e-32	TRUE
ENSG00000116991.12	SIPA1L2	4.0614	5.05464e-25	4.57438e-24	TRUE	4.30447	3.20526e-16	2.09753e-15	TRUE
ENSG00000135749.19	PCNX2	4.72068	4.16684e-32	5.36237e-31	TRUE	4.14141	5.01174e-19	3.8012e-18	TRUE
ENSG00000143674.11	MAP3K21	6.69082	5.54669e-52	2.37962e-50	TRUE	7.64571	1.70156e-49	1.05039e-47	TRUE
ENSG00000059588.10	TARBP1	4.02563	1.68888e-15	1.01596e-14	FALSE	4.49815	1.98727e-17	1.38501e-16	TRUE
ENSG00000168264.11	IRF2BP2	7.36335	3.28553e-60	2.55698e-58	TRUE	7.71173	1.92989e-52	1.55661e-50	TRUE
ENSG00000173726.11	TOMM20	8.1862	2.33175e-83	1.3662e-80	TRUE	8.32796	3.75176e-70	1.64495e-67	TRUE
ENSG00000054267.22	ARID4B	4.74873	1.35376e-32	1.78302e-31	TRUE	5.03565	4.23362e-31	6.33081e-30	TRUE
ENSG00000152904.11	GGPS1	5.51231	1.17963e-35	1.82778e-34	TRUE	5.69498	1.12596e-28	1.4608e-27	TRUE
ENSG00000285053.1	TBCE	5.48074	9.39734e-35	1.38991e-33	TRUE	5.77743	5.12184e-31	7.60581e-30	TRUE
ENSG00000284770.2	TBCE	4.75405	3.9274e-27	3.9345e-26	TRUE	4.50095	1.60195e-20	1.31506e-19	TRUE
ENSG00000162885.14	B3GALNT2	5.33567	1.30582e-36	2.1295e-35	TRUE	5.12078	1.99427e-27	2.41252e-26	TRUE
ENSG00000168243.11	GNG4	6.35408	5.78146e-32	7.37545e-31	TRUE	5.57088	4.87569e-17	3.32556e-16	TRUE
ENSG00000143669.15	LYST	3.76067	2.21686e-22	1.79688e-21	TRUE	3.67981	6.42272e-12	3.38132e-11	TRUE
ENSG00000116962.15	NID1	5.89881	4.29348e-40	8.5218e-39	TRUE	6.05836	1.49175e-40	4.40556e-39	TRUE
ENSG00000086619.15	ERO1B	3.98207	1.54149e-19	1.11053e-18	TRUE	3.76598	1.69281e-11	8.69385e-11	FALSE
ENSG00000116977.19	LGALS8	5.02963	9.05027e-29	9.74246e-28	TRUE	5.46001	9.23871e-26	1.02218e-24	TRUE
ENSG00000119285.11	HEATR1	7.04698	9.19766e-76	2.40276e-73	TRUE	6.87548	1.19663e-62	2.45052e-60	TRUE
ENSG00000116984.15	MTR	5.44514	3.44641e-45	9.29942e-44	TRUE	5.06369	1.06766e-31	1.65667e-30	TRUE
ENSG00000203668.3	CHML	8.20493	3.92625e-66	4.72232e-64	TRUE	7.64437	9.70543e-52	7.24831e-50	TRUE
ENSG00000174371.17	EXO1	6.89166	2.582e-52	1.13018e-50	TRUE	6.70963	2.96032e-35	5.9101e-34	TRUE
ENSG00000143702.16	CEP170	6.18899	1.36748e-57	8.49787e-56	TRUE	5.89035	1.74416e-43	6.56198e-42	TRUE
ENSG00000117020.19	AKT3	6.06709	5.99369e-64	6.23922e-62	TRUE	6.65438	1.01804e-57	1.37071e-55	TRUE
ENSG00000179456.11	ZBTB18	6.96299	3.98755e-49	1.40624e-47	TRUE	6.71344	6.97713e-31	1.02938e-29	TRUE
ENSG00000035687.10	ADSS2	6.64716	7.60281e-46	2.12848e-44	TRUE	6.41435	7.66627e-34	1.37554e-32	TRUE
ENSG00000121644.19	DESI2	8.33893	7.98025e-73	1.62837e-70	TRUE	8.60735	1.52391e-75	1.24086e-72	TRUE
ENSG00000153187.20	HNRNPU	6.47579	1.10419e-82	6.11988e-80	TRUE	6.51284	3.49924e-68	1.17324e-65	TRUE
ENSG00000162852.14	CNST	7.48446	7.60366e-29	8.22406e-28	TRUE	6.07841	1.4897e-24	1.53823e-23	TRUE
ENSG00000153207.16	AHCTF1	6.58782	3.69004e-37	6.24353e-36	TRUE	6.512	3.72077e-34	6.82654e-33	TRUE
ENSG00000162714.13	ZNF496	5.40408	3.24669e-26	3.11339e-25	TRUE	5.31365	1.56365e-16	1.04139e-15	TRUE
ENSG00000143727.16	ACP1	6.83819	7.13391e-50	2.64548e-48	TRUE	7.2716	8.81388e-43	3.12358e-41	TRUE
ENSG00000130508.11	PXDN	5.2846	9.86935e-29	1.0613e-27	TRUE	3.93839	1.36995e-10	6.71217e-10	FALSE
ENSG00000182551.14	ADI1	5.87312	1.55875e-28	1.66356e-27	TRUE	5.43419	2.32897e-20	1.89774e-19	TRUE
ENSG00000171865.10	RNASEH1	7.52754	2.33744e-47	7.19188e-46	TRUE	7.99975	7.53204e-43	2.68042e-41	TRUE
ENSG00000171863.15	RPS7	4.86821	1.56382e-40	3.19574e-39	TRUE	5.64846	6.93062e-41	2.09938e-39	TRUE
ENSG00000151692.15	RNF144A	5.80288	6.41625e-25	5.78238e-24	FALSE	5.75857	3.67106e-23	3.52362e-22	TRUE
ENSG00000115738.10	ID2	7.44771	3.54631e-41	7.52061e-40	TRUE	6.61365	3.67672e-25	3.92448e-24	TRUE
ENSG00000134313.17	KIDINS220	4.58247	6.15503e-33	8.26596e-32	TRUE	5.23538	8.01698e-30	1.11271e-28	TRUE
ENSG00000143797.12	MBOAT2	6.22854	6.62036e-34	9.38242e-33	TRUE	7.5481	2.90785e-32	4.69304e-31	TRUE
ENSG00000151693.11	ASAP2	5.12959	6.47418e-28	6.72063e-27	TRUE	4.94012	5.52343e-20	4.4269e-19	TRUE
ENSG00000119185.13	ITGB1BP1	5.22203	3.62537e-20	2.68686e-19	TRUE	6.40929	1.0582e-24	1.10233e-23	TRUE
ENSG00000119203.14	CPSF3	5.64984	7.44683e-25	6.6847e-24	FALSE	5.87935	2.72474e-21	2.33659e-20	TRUE
ENSG00000151694.14	ADAM17	4.67851	3.86716e-25	3.52149e-24	TRUE	4.61946	1.19052e-14	7.18831e-14	FALSE
ENSG00000134308.14	YWHAQ	7.95314	4.83357e-66	5.74621e-64	TRUE	8.28668	3.99449e-70	1.72921e-67	TRUE
ENSG00000172059.11	KLF11	6.88637	2.8923e-40	5.8064e-39	TRUE	8.48264	3.07479e-31	4.6467e-30	TRUE
ENSG00000171848.16	RRM2	6.28405	1.38019e-41	3.00942e-40	TRUE	6.67066	3.12697e-43	1.15361e-41	TRUE
ENSG00000115758.13	ODC1	6.72195	2.8937e-54	1.4598e-52	TRUE	7.80556	1.0913e-48	6.36884e-47	TRUE
ENSG00000115761.17	NOL10	4.67941	2.16064e-27	2.19294e-26	TRUE	4.73819	8.52443e-22	7.51358e-21	TRUE
ENSG00000143870.13	PDIA6	5.32641	3.43164e-31	4.21899e-30	TRUE	5.87911	4.05877e-28	5.10128e-27	TRUE
ENSG00000134318.15	ROCK2	6.29885	4.50523e-49	1.58471e-47	TRUE	6.91165	1.62922e-43	6.15664e-42	TRUE
ENSG00000169016.17	E2F6	5.96824	2.95689e-34	4.2657e-33	TRUE	7.89354	3.21441e-28	4.06695e-27	TRUE
ENSG00000079785.16	DDX1	4.44432	1.74202e-25	1.61463e-24	TRUE	5.30052	1.19727e-28	1.55214e-27	TRUE
ENSG00000163029.16	SMC6	5.02115	9.42464e-26	8.84131e-25	TRUE	4.37942	4.15459e-16	2.70068e-15	TRUE
ENSG00000178295.15	GEN1	6.72439	2.18563e-39	4.18299e-38	TRUE	6.53395	4.5523e-34	8.30759e-33	TRUE
ENSG00000118965.16	WDR35	6.10953	5.80323e-36	9.14734e-35	TRUE	6.81256	1.60796e-27	1.96255e-26	TRUE
ENSG00000055917.16	PUM2	7.4068	5.03005e-68	7.11387e-66	TRUE	7.54098	1.30884e-60	2.26066e-58	TRUE
ENSG00000143878.10	RHOB	8.55993	1.31924e-30	1.5706e-29	TRUE	7.14486	4.0638e-32	6.48217e-31	TRUE
ENSG00000119778.15	ATAD2B	6.1311	1.10606e-36	1.80949e-35	TRUE	5.73165	2.91418e-29	3.92216e-28	TRUE
ENSG00000173960.14	UBXN2A	6.34282	1.02428e-37	1.79528e-36	TRUE	6.266	3.06938e-28	3.89209e-27	TRUE
ENSG00000163026.12	WDCP	7.2411	4.20401e-36	6.67531e-35	TRUE	9.75882	1.90149e-17	1.32658e-16	TRUE
ENSG00000198399.16	ITSN2	5.43825	2.27967e-29	2.52289e-28	TRUE	5.59502	3.02988e-33	5.228e-32	TRUE
ENSG00000084676.16	NCOA1	7.33652	1.5841e-49	5.70918e-48	TRUE	6.23666	7.476e-33	1.25576e-31	TRUE
ENSG00000138092.11	CENPO	6.05153	7.16445e-42	1.58662e-40	TRUE	6.48145	3.18985e-29	4.28307e-28	TRUE
ENSG00000138031.15	ADCY3	5.00094	1.34672e-26	1.3173e-25	TRUE	5.32657	1.48462e-22	1.37334e-21	TRUE
ENSG00000119772.19	DNMT3A	3.52721	5.55587e-19	3.90989e-18	TRUE	4.04452	7.68391e-15	4.68751e-14	TRUE
ENSG00000143970.18	ASXL2	7.16538	2.21852e-70	3.58626e-68	TRUE	7.54998	1.42747e-54	1.3948e-52	TRUE
ENSG00000084733.11	RAB10	8.36645	1.46137e-62	1.35007e-60	TRUE	8.74635	1.11877e-41	3.60952e-40	TRUE
ENSG00000084754.12	HADHA	6.71147	5.96325e-30	6.84323e-29	TRUE	6.40323	6.8437e-33	1.15187e-31	TRUE
ENSG00000138018.19	SELENOI	7.92826	1.88121e-50	7.28575e-49	TRUE	7.46102	2.7606e-51	1.97098e-49	TRUE
ENSG00000213699.9	SLC35F6	6.43067	4.30003e-36	6.82513e-35	TRUE	6.4371	1.37359e-26	1.5897e-25	TRUE
ENSG00000157851.17	DPYSL5	5.94863	8.62974e-39	1.60009e-37	TRUE	4.66108	4.28698e-18	3.1009e-17	TRUE
ENSG00000119777.20	TMEM214	5.85457	2.9869e-32	3.86573e-31	TRUE	4.83137	1.24183e-14	7.4902e-14	FALSE
ENSG00000084693.16	AGBL5	5.84287	2.09445e-34	3.03863e-33	TRUE	5.19454	2.55465e-21	2.19404e-20	TRUE
ENSG00000115204.15	MPV17	4.81174	1.22115e-19	8.83477e-19	TRUE	5.3981	4.55354e-12	2.41549e-11	FALSE
ENSG00000115207.15	GTF3C2	5.21517	8.03197e-33	1.07129e-31	TRUE	4.92704	1.71401e-18	1.26768e-17	TRUE
ENSG00000115241.11	PPM1G	4.43185	1.88778e-26	1.83125e-25	TRUE	5.35007	7.52536e-27	8.82578e-26	TRUE
ENSG00000243943.10	ZNF512	5.91792	1.41764e-32	1.86535e-31	TRUE	5.33351	9.60203e-20	7.58208e-19	TRUE
ENSG00000198522.14	GPN1	5.93368	5.76906e-32	7.36422e-31	TRUE	6.36336	7.18157e-23	6.77151e-22	TRUE
ENSG00000119760.16	SUPT7L	7.76205	4.32495e-34	6.17415e-33	TRUE	8.5172	1.4488e-21	1.25947e-20	TRUE
ENSG00000213639.10	PPP1CB	7.34869	2.37215e-47	7.28228e-46	TRUE	8.3542	9.04474e-50	5.71758e-48	TRUE
ENSG00000163811.12	WDR43	6.06087	2.15139e-46	6.22264e-45	TRUE	5.8727	6.59619e-44	2.57515e-42	TRUE
ENSG00000119801.13	YPEL5	5.63594	7.7429e-28	8.00523e-27	TRUE	7.0522	9.45998e-22	8.31462e-21	TRUE
ENSG00000172954.14	LCLAT1	7.66287	2.59494e-56	1.47613e-54	TRUE	7.73419	1.02268e-41	3.31512e-40	TRUE
ENSG00000021574.13	SPAST	5.39144	6.84968e-31	8.27734e-30	TRUE	6.04487	8.28219e-22	7.30571e-21	TRUE
ENSG00000152683.14	SLC30A6	7.7525	1.11996e-09	5.17743e-09	TRUE	7.88442	4.04289e-35	7.93701e-34	TRUE
ENSG00000119820.11	YIPF4	5.40344	1.38674e-31	1.74251e-30	TRUE	7.53602	1.89642e-24	1.94645e-23	TRUE
ENSG00000115760.15	BIRC6	6.14167	2.37344e-59	1.68708e-57	TRUE	6.41637	3.1542e-51	2.24263e-49	TRUE
ENSG00000119812.20	FAM98A	5.79121	2.02985e-39	3.89392e-38	TRUE	6.0456	1.05392e-32	1.74882e-31	TRUE
ENSG00000150938.10	CRIM1	6.18812	6.03518e-28	6.27285e-27	TRUE	5.86388	4.37405e-21	3.70451e-20	FALSE
ENSG00000115808.12	STRN	7.28481	9.99686e-60	7.41431e-58	TRUE	7.18477	1.49362e-48	8.54185e-47	TRUE
ENSG00000008869.12	HEATR5B	4.83279	7.97251e-27	7.89246e-26	TRUE	5.80429	1.83841e-24	1.88861e-23	TRUE
ENSG00000152133.17	GPATCH11	7.89298	1.03124e-37	1.80595e-36	TRUE	8.15094	1.03818e-36	2.31152e-35	TRUE
ENSG00000055332.19	EIF2AK2	6.67478	9.01232e-47	2.67461e-45	TRUE	6.62631	1.1554e-42	4.05266e-41	TRUE
ENSG00000218739.10	CEBPZOS	7.45251	1.37687e-39	2.67254e-38	TRUE	6.44009	1.59905e-30	2.30645e-29	TRUE
ENSG00000115816.15	CEBPZ	5.51622	1.44758e-37	2.51254e-36	TRUE	6.63159	8.90456e-35	1.69842e-33	TRUE
ENSG00000115825.11	PRKD3	7.53204	5.26021e-66	6.19949e-64	TRUE	6.89075	1.34127e-42	4.6854e-41	TRUE
ENSG00000163171.8	CDC42EP3	6.61791	2.82682e-31	3.49109e-30	TRUE	5.69511	1.11949e-21	9.80923e-21	TRUE
ENSG00000119787.14	ATL2	6.3142	8.56401e-45	2.24151e-43	TRUE	7.06494	1.06227e-40	3.17834e-39	TRUE
ENSG00000115875.19	SRSF7	6.4549	1.01751e-28	1.09389e-27	TRUE	6.00138	5.45833e-35	1.05702e-33	TRUE
ENSG00000163214.21	DHX57	4.89457	3.98216e-21	3.0729e-20	TRUE	5.28261	4.33998e-23	4.14358e-22	TRUE
ENSG00000115904.15	SOS1	6.33763	2.72736e-50	1.04056e-48	TRUE	6.54026	4.47858e-39	1.18639e-37	TRUE
ENSG00000011566.15	MAP4K3	5.83129	1.80361e-21	1.40897e-20	FALSE	5.9032	2.35905e-24	2.40827e-23	TRUE
ENSG00000138050.15	THUMPD2	6.28294	5.06727e-27	5.05421e-26	TRUE	7.1774	4.87369e-24	4.89933e-23	TRUE
ENSG00000143924.19	EML4	7.64028	1.24767e-50	4.91563e-49	TRUE	6.62419	4.88484e-36	1.03249e-34	TRUE
ENSG00000115944.15	COX7A2L	4.68985	5.3134e-24	4.6024e-23	TRUE	5.24914	4.23732e-21	3.59138e-20	TRUE
ENSG00000152518.8	ZFP36L2	8.17303	2.05551e-43	4.93009e-42	TRUE	7.91698	2.01168e-32	3.27451e-31	TRUE
ENSG00000138095.20	LRPPRC	5.56836	2.91236e-37	4.95839e-36	TRUE	5.39744	5.34316e-33	9.07753e-32	TRUE
ENSG00000138032.21	PPM1B	7.33309	1.26436e-27	1.29544e-26	TRUE	6.72971	7.12512e-24	7.11659e-23	TRUE
ENSG00000138078.16	PREPL	6.24305	4.10637e-42	9.19316e-41	TRUE	7.56897	2.45935e-38	6.17076e-37	TRUE
ENSG00000119729.12	RHOQ	6.21835	1.05464e-39	2.05682e-38	TRUE	6.25241	1.23742e-33	2.18814e-32	TRUE
ENSG00000171150.9	SOCS5	5.73919	1.27476e-27	1.30544e-26	TRUE	6.45994	3.14414e-32	5.05531e-31	TRUE
ENSG00000180398.13	MCFD2	7.83857	4.85202e-65	5.30669e-63	TRUE	8.52045	1.17445e-56	1.39462e-54	TRUE
ENSG00000143933.20	CALM2	5.58628	1.73378e-42	3.96151e-41	TRUE	6.65803	6.15389e-34	1.1153e-32	TRUE
ENSG00000095002.15	MSH2	4.48283	6.97659e-22	5.53302e-21	TRUE	4.86851	2.10585e-20	1.71921e-19	TRUE
ENSG00000116062.18	MSH6	4.88112	3.77778e-34	5.41376e-33	TRUE	5.18735	3.77483e-31	5.66208e-30	TRUE
ENSG00000138081.22	FBXO11	5.0202	7.7114e-32	9.78272e-31	TRUE	4.7509	2.00375e-23	1.95343e-22	TRUE
ENSG00000170802.17	FOXN2	7.47802	2.22526e-48	7.42008e-47	TRUE	8.10961	2.09592e-37	4.94676e-36	TRUE
ENSG00000068912.15	ERLEC1	5.26806	4.15492e-27	4.15836e-26	TRUE	4.4839	1.82085e-17	1.27214e-16	TRUE
ENSG00000068878.15	PSME4	6.22372	1.65814e-42	3.79291e-41	TRUE	6.33116	1.9177e-42	6.57809e-41	TRUE
ENSG00000115306.16	SPTBN1	5.22944	6.99519e-45	1.84502e-43	TRUE	5.27067	3.63735e-34	6.67706e-33	TRUE
ENSG00000115310.19	RTN4	6.56687	9.65895e-52	4.07145e-50	TRUE	6.79088	2.58243e-38	6.45589e-37	TRUE
ENSG00000143947.15	RPS27A	4.79039	4.51838e-26	4.30169e-25	TRUE	5.62512	1.42077e-43	5.38681e-42	TRUE
ENSG00000115355.18	CCDC88A	5.95956	2.14292e-42	4.87193e-41	TRUE	5.37321	4.62009e-32	7.34212e-31	TRUE
ENSG00000275052.5	PPP4R3B	7.4617	1.00863e-44	2.6282e-43	TRUE	6.90834	3.28984e-43	1.20978e-41	TRUE
ENSG00000138035.15	PNPT1	5.41022	2.9949e-32	3.87486e-31	TRUE	5.77351	1.01446e-28	1.31964e-27	TRUE
ENSG00000119866.22	BCL11A	4.02664	1.27297e-22	1.04399e-21	TRUE	3.46036	1.44505e-10	7.07002e-10	TRUE
ENSG00000115421.13	PAPOLG	6.2365	1.38849e-39	2.69256e-38	TRUE	6.04649	2.55658e-32	4.14371e-31	TRUE
ENSG00000162924.15	REL	6.71244	3.67393e-51	1.50082e-49	TRUE	6.5002	1.60873e-35	3.27873e-34	TRUE
ENSG00000267520.2	ENSG00000267520	6.90565	5.17433e-31	6.29919e-30	TRUE	9.6449	2.33558e-11	1.18914e-10	FALSE
ENSG00000162928.9	PEX13	7.26679	4.59031e-30	5.31077e-29	TRUE	7.73521	1.96495e-22	1.80595e-21	TRUE
ENSG00000115464.15	USP34	6.02299	1.81261e-50	7.02671e-49	TRUE	6.08728	1.12946e-47	5.99787e-46	TRUE
ENSG00000082898.19	XPO1	6.02254	4.97234e-51	2.01717e-49	TRUE	6.49462	1.93988e-52	1.56099e-50	TRUE
ENSG00000115484.15	CCT4	6.70542	2.34095e-50	8.98985e-49	TRUE	6.64021	2.86134e-49	1.72584e-47	TRUE
ENSG00000115504.15	EHBP1	5.18076	5.48485e-39	1.02673e-37	TRUE	5.52676	4.77013e-30	6.71332e-29	TRUE
ENSG00000014641.21	MDH1	7.34453	4.27494e-21	3.29387e-20	FALSE	7.451	8.2261e-21	6.86995e-20	TRUE
ENSG00000143952.20	VPS54	6.4928	2.93392e-42	6.61527e-41	TRUE	6.82905	1.25956e-36	2.78626e-35	TRUE
ENSG00000197329.12	PELI1	7.01198	2.00132e-30	2.36004e-29	TRUE	6.51526	2.83315e-24	2.8828e-23	TRUE
ENSG00000119862.13	LGALSL	6.58221	3.3941e-40	6.7839e-39	TRUE	6.87711	1.7106e-24	1.75943e-23	TRUE
ENSG00000119844.17	AFTPH	6.69459	7.37499e-28	7.63255e-27	TRUE	6.99301	3.11537e-28	3.94894e-27	TRUE
ENSG00000179833.4	SERTAD2	7.82806	2.84523e-49	1.01034e-47	TRUE	6.97494	9.14661e-42	2.98478e-40	TRUE
ENSG00000011523.14	CEP68	6.20196	1.43714e-29	1.61354e-28	TRUE	6.3373	3.07213e-18	2.23968e-17	FALSE
ENSG00000138069.18	RAB1A	7.344	1.01634e-41	2.22911e-40	TRUE	7.01233	2.90044e-36	6.25819e-35	TRUE
ENSG00000138071.15	ACTR2	7.122	1.58816e-63	1.5887e-61	TRUE	7.51111	9.32258e-54	8.4918e-52	TRUE
ENSG00000198369.10	SPRED2	7.22549	1.55347e-63	1.55874e-61	TRUE	7.34983	3.66173e-47	1.83888e-45	TRUE
ENSG00000143971.9	ETAA1	7.02463	5.77799e-29	6.29258e-28	TRUE	7.29577	1.70392e-27	2.07449e-26	TRUE
ENSG00000115946.8	PNO1	6.07148	3.474e-27	3.48624e-26	TRUE	9.72562	1.43395e-17	1.0076e-16	TRUE
ENSG00000221823.11	PPP3R1	8.00504	4.79987e-47	1.44539e-45	TRUE	8.04276	2.46715e-37	5.77905e-36	TRUE
ENSG00000273275.1	ENSG00000273275	8.7392	5.27989e-21	4.05144e-20	TRUE	9.1997	7.60735e-16	4.88479e-15	TRUE
ENSG00000169604.21	ANTXR1	5.65715	2.07167e-48	6.97025e-47	TRUE	5.26656	2.96086e-19	2.27649e-18	TRUE
ENSG00000198380.13	GFPT1	6.53253	6.09231e-47	1.81988e-45	TRUE	7.62054	1.49841e-42	5.18664e-41	TRUE
ENSG00000115977.21	AAK1	6.08639	2.8256e-48	9.36099e-47	TRUE	6.02739	4.34401e-42	1.45221e-40	TRUE
ENSG00000087338.5	GMCL1	8.05899	1.61636e-30	1.9171e-29	TRUE	7.30059	2.10128e-33	3.65708e-32	TRUE
ENSG00000124380.11	SNRNP27	5.9731	1.47597e-28	1.57686e-27	TRUE	7.11983	1.41789e-22	1.31411e-21	TRUE
ENSG00000059728.11	MXD1	6.30314	1.31211e-47	4.13008e-46	TRUE	6.49434	9.14223e-33	1.52888e-31	TRUE
ENSG00000179818.16	PCBP1-AS1	4.45448	5.4099e-32	6.91866e-31	TRUE	4.53909	1.63051e-22	1.50464e-21	TRUE
ENSG00000169564.7	PCBP1	7.5707	5.14424e-52	2.21159e-50	TRUE	8.89591	1.38762e-35	2.84334e-34	TRUE
ENSG00000116001.17	TIA1	7.63114	4.46497e-32	5.73884e-31	TRUE	6.57224	1.12144e-23	1.10749e-22	TRUE
ENSG00000116005.12	PCYOX1	6.06266	2.98632e-32	3.86573e-31	TRUE	6.08123	1.10601e-26	1.28393e-25	TRUE
ENSG00000035141.8	FAM136A	9.19115	1.54251e-34	2.25462e-33	TRUE	7.54902	2.8424e-43	1.05316e-41	TRUE
ENSG00000075340.23	ADD2	5.39588	3.07886e-37	5.23317e-36	TRUE	5.32117	2.67634e-29	3.60347e-28	TRUE
ENSG00000144043.12	TEX261	7.47476	9.94447e-53	4.44295e-51	TRUE	7.07744	9.61838e-42	3.1268e-40	TRUE
ENSG00000124374.9	PAIP2B	5.17238	3.44109e-27	3.45406e-26	TRUE	6.31872	1.98208e-23	1.9334e-22	TRUE
ENSG00000075292.19	ZNF638	6.35462	7.22693e-51	2.90309e-49	TRUE	6.64994	3.7597e-37	8.65846e-36	TRUE
ENSG00000144036.16	EXOC6B	5.35648	1.38621e-33	1.92269e-32	TRUE	5.54242	2.28431e-27	2.75754e-26	TRUE
ENSG00000135624.17	CCT7	4.07132	5.16258e-22	4.11861e-21	FALSE	4.11653	4.55631e-21	3.85601e-20	TRUE
ENSG00000116127.20	ALMS1	6.53185	2.38196e-55	1.28207e-53	TRUE	5.65183	6.8379e-40	1.9168e-38	TRUE
ENSG00000124356.17	STAMBP	6.0903	9.732e-53	4.35276e-51	TRUE	5.88053	5.07519e-38	1.24153e-36	TRUE
ENSG00000187605.16	TET3	6.81589	8.35408e-55	4.34264e-53	TRUE	5.54487	9.03357e-33	1.51144e-31	TRUE
ENSG00000114978.18	MOB1A	9.06285	6.71355e-73	1.39066e-70	TRUE	8.66706	1.17886e-64	2.83914e-62	TRUE
ENSG00000065911.13	MTHFD2	5.98659	2.35749e-47	7.24812e-46	TRUE	6.93752	7.11813e-48	3.82155e-46	TRUE
ENSG00000159399.10	HK2	6.15386	2.58972e-46	7.45368e-45	TRUE	6.22074	3.18646e-37	7.37804e-36	TRUE
ENSG00000115364.14	MRPL19	7.34971	3.31055e-62	2.9711e-60	TRUE	7.54962	7.41633e-52	5.59892e-50	TRUE
ENSG00000005436.14	GCFC2	6.3509	9.92591e-35	1.46703e-33	TRUE	6.37196	4.33984e-26	4.88861e-25	TRUE
ENSG00000176407.18	KCMF1	6.49827	4.60028e-33	6.22487e-32	TRUE	6.55933	8.08132e-34	1.44774e-32	TRUE
ENSG00000152291.15	TGOLN2	7.29307	1.41826e-71	2.59681e-69	TRUE	6.16754	7.43494e-49	4.38392e-47	TRUE
ENSG00000168906.13	MAT2A	10.7448	9.88987e-40	1.93246e-38	TRUE	8.51764	1.79922e-50	1.19247e-48	TRUE
ENSG00000115486.13	GGCX	4.11005	3.82778e-19	2.71004e-18	FALSE	4.39857	7.20812e-16	4.63448e-15	TRUE
ENSG00000168883.20	USP39	5.55857	2.42586e-35	3.69729e-34	TRUE	6.4036	8.82388e-28	1.08824e-26	TRUE
ENSG00000168887.11	C2orf68	6.82252	6.64317e-31	8.03622e-30	TRUE	5.86633	5.00259e-22	4.4798e-21	TRUE
ENSG00000068654.17	POLR1A	4.85933	8.39183e-34	1.17951e-32	TRUE	4.75782	5.84518e-20	4.67601e-19	TRUE
ENSG00000132300.19	PTCD3	5.06349	1.12356e-30	1.34427e-29	TRUE	6.0951	5.37209e-31	7.96014e-30	TRUE
ENSG00000132305.22	IMMT	6.19619	1.8586e-38	3.39549e-37	TRUE	6.33555	2.09555e-29	2.836e-28	TRUE
ENSG00000132313.15	MRPL35	7.42165	1.20505e-41	2.63455e-40	TRUE	7.36758	7.24211e-39	1.88059e-37	TRUE
ENSG00000115548.17	KDM3A	4.4045	9.49553e-30	1.07821e-28	TRUE	5.12943	3.80703e-27	4.53647e-26	TRUE
ENSG00000115561.16	CHMP3	6.0935	2.12991e-33	2.93239e-32	TRUE	6.10073	1.91437e-27	2.3208e-26	TRUE
ENSG00000153561.13	RMND5A	8.75811	6.73699e-72	1.27922e-69	TRUE	8.98273	1.96754e-63	4.34116e-61	TRUE
ENSG00000084090.14	STARD7	9.66148	2.86058e-89	2.21366e-86	TRUE	8.6168	2.24851e-86	5.49263e-83	TRUE
ENSG00000135956.9	TMEM127	5.6211	3.64973e-24	3.18083e-23	TRUE	6.17763	2.77002e-24	2.82024e-23	TRUE
ENSG00000144021.3	CIAO1	6.93859	2.52726e-33	3.4655e-32	TRUE	5.44926	1.97001e-20	1.61062e-19	TRUE
ENSG00000144028.15	SNRNP200	4.16454	2.54924e-17	1.6702e-16	TRUE	4.70335	9.62663e-23	8.99511e-22	TRUE
ENSG00000121152.10	NCAPH	6.53248	1.91942e-33	2.64971e-32	TRUE	5.83624	4.42494e-27	5.25629e-26	TRUE
ENSG00000114982.19	KANSL3	6.08925	2.37414e-42	5.38271e-41	TRUE	6.75193	1.43549e-41	4.58378e-40	TRUE
ENSG00000168763.16	CNNM3	5.04048	2.58121e-23	2.17384e-22	FALSE	5.65379	3.47141e-19	2.65234e-18	TRUE
ENSG00000075568.17	TMEM131	6.15885	1.25514e-37	2.18405e-36	TRUE	5.20303	1.35117e-21	1.17729e-20	TRUE
ENSG00000040933.16	INPP4A	4.25408	2.0563e-22	1.66938e-21	TRUE	5.00792	1.369e-23	1.34613e-22	TRUE
ENSG00000071073.13	MGAT4A	6.71587	1.17182e-32	1.54785e-31	TRUE	6.64138	8.38153e-25	8.78455e-24	TRUE
ENSG00000185414.20	MRPL30	7.66119	3.76901e-40	7.51913e-39	TRUE	8.0008	3.3395e-32	5.3669e-31	TRUE
ENSG00000158417.11	EIF5B	5.14573	1.78646e-40	3.64164e-39	TRUE	4.50332	3.5358e-24	3.57965e-23	TRUE
ENSG00000135945.10	REV1	5.53599	1.97749e-28	2.10116e-27	TRUE	6.20627	8.74177e-27	1.02243e-25	TRUE
ENSG00000170500.13	LONRF2	5.71295	3.00882e-37	5.12048e-36	TRUE	6.47351	4.68226e-32	7.43747e-31	TRUE
ENSG00000071082.11	RPL31	5.50033	9.30331e-44	2.28209e-42	TRUE	5.32306	1.1628e-34	2.20191e-33	TRUE
ENSG00000158435.8	CNOT11	6.61576	2.98139e-31	3.67866e-30	TRUE	6.79449	3.43707e-31	5.18045e-30	TRUE
ENSG00000071054.17	MAP4K4	4.97157	6.20776e-33	8.33405e-32	TRUE	4.81938	3.36596e-24	3.41175e-23	TRUE
ENSG00000135966.13	TGFBRAP1	7.05502	1.94623e-39	3.74052e-38	TRUE	8.38701	1.0318e-24	1.07646e-23	TRUE
ENSG00000135974.10	C2orf49	7.81427	3.54416e-45	9.55689e-44	TRUE	6.64337	9.34015e-37	2.0891e-35	TRUE
ENSG00000135968.22	GCC2	5.3161	3.20942e-31	3.95288e-30	TRUE	6.18744	3.01715e-35	6.01303e-34	TRUE
ENSG00000169756.17	LIMS1	6.25906	3.57179e-34	5.12574e-33	TRUE	6.27779	1.13539e-32	1.87852e-31	TRUE
ENSG00000153201.16	RANBP2	7.64113	1.97317e-63	1.94538e-61	TRUE	7.05562	4.6162e-57	5.74071e-55	TRUE
ENSG00000163006.12	CCDC138	5.11574	3.53254e-22	2.8364e-21	TRUE	6.25558	7.2133e-22	6.39087e-21	TRUE
ENSG00000186522.15	SEPTIN10	4.93679	2.35031e-25	2.16765e-24	TRUE	5.68108	1.60468e-22	1.4812e-21	TRUE
ENSG00000169679.15	BUB1	6.61516	5.12357e-35	7.68049e-34	TRUE	6.52155	2.11313e-35	4.26857e-34	TRUE
ENSG00000153094.24	BCL2L11	6.85989	3.14484e-47	9.58979e-46	TRUE	7.24235	3.43113e-38	8.503e-37	TRUE
ENSG00000153107.13	ANAPC1	6.18326	2.04606e-43	4.91317e-42	TRUE	6.18434	2.51205e-36	5.43732e-35	TRUE
ENSG00000114999.8	TTL	5.92644	2.9352e-54	1.47711e-52	TRUE	5.88257	1.21532e-40	3.6173e-39	TRUE
ENSG00000125630.16	POLR1B	6.68723	2.2824e-53	1.06861e-51	TRUE	7.23098	1.98104e-38	5.00366e-37	TRUE
ENSG00000144136.11	SLC20A1	6.79859	3.25974e-52	1.41927e-50	TRUE	7.12672	3.2535e-43	1.1977e-41	TRUE
ENSG00000169607.13	CKAP2L	7.47576	2.86803e-39	5.45843e-38	TRUE	8.37388	2.09214e-25	2.27212e-24	TRUE
ENSG00000115084.15	SLC35F5	5.96019	5.17695e-42	1.15395e-40	TRUE	7.07446	9.08277e-37	2.03553e-35	TRUE
ENSG00000115091.12	ACTR3	6.4074	2.07784e-48	6.97956e-47	TRUE	6.00637	6.56434e-39	1.71108e-37	TRUE
ENSG00000088205.13	DDX18	6.8318	1.00187e-50	3.97013e-49	TRUE	6.60823	3.60837e-44	1.43491e-42	TRUE
ENSG00000125633.11	CCDC93	6.73717	6.04138e-44	1.49898e-42	TRUE	6.34598	6.85194e-33	1.15263e-31	TRUE
ENSG00000088179.9	PTPN4	6.02343	2.6705e-39	5.09432e-38	TRUE	6.41261	3.26694e-27	3.91472e-26	TRUE
ENSG00000115109.14	EPB41L5	5.48067	5.36879e-25	4.85226e-24	TRUE	5.27921	3.73226e-22	3.36336e-21	TRUE
ENSG00000226479.4	TMEM185B	4.84089	9.99185e-25	8.9127e-24	FALSE	5.05336	7.78268e-13	4.29013e-12	TRUE
ENSG00000074054.20	CLASP1	5.5287	4.70877e-44	1.17759e-42	TRUE	5.7892	4.46298e-36	9.4801e-35	TRUE
ENSG00000155438.12	NIFK	6.5171	2.05826e-39	3.94289e-38	TRUE	6.42299	3.6866e-28	4.64548e-27	TRUE
ENSG00000211460.12	TSN	6.87154	4.61228e-51	1.87481e-49	TRUE	6.45264	1.67369e-35	3.40705e-34	TRUE
ENSG00000169967.17	MAP3K2	7.93908	1.14108e-54	5.87944e-53	TRUE	7.37302	1.48844e-48	8.52649e-47	TRUE
ENSG00000136709.12	WDR33	5.7454	4.6078e-34	6.57565e-33	TRUE	5.4387	9.36282e-26	1.0349e-24	TRUE
ENSG00000144231.11	POLR2D	7.78128	2.24711e-52	9.88875e-51	TRUE	7.84933	1.2946e-47	6.85356e-46	TRUE
ENSG00000144233.11	AMMECR1L	7.83051	7.62004e-49	2.64854e-47	TRUE	6.50997	1.93099e-36	4.21698e-35	TRUE
ENSG00000136715.19	SAP130	7.50976	2.01518e-59	1.44494e-57	TRUE	6.54468	3.56949e-38	8.82029e-37	TRUE
ENSG00000136731.13	UGGT1	5.79127	3.04072e-45	8.22097e-44	TRUE	6.19358	1.65363e-38	4.18906e-37	TRUE
ENSG00000136699.20	SMPD4	5.20169	4.44237e-33	6.01716e-32	TRUE	5.30719	2.5453e-26	2.90253e-25	TRUE
ENSG00000136718.10	IMP4	6.82994	7.8146e-31	9.4184e-30	TRUE	6.48661	3.27278e-31	4.94153e-30	TRUE
ENSG00000072135.13	PTPN18	4.80389	2.09541e-20	1.56913e-19	TRUE	5.25566	2.94035e-15	1.83511e-14	FALSE
ENSG00000152102.18	FAM168B	8.62294	6.76602e-67	8.72647e-65	TRUE	8.92439	2.07033e-69	8.13831e-67	TRUE
ENSG00000115762.17	PLEKHB2	7.85819	6.46468e-59	4.44125e-57	TRUE	7.19609	6.51534e-48	3.50895e-46	TRUE
ENSG00000152127.9	MGAT5	6.61535	2.31452e-43	5.53193e-42	TRUE	7.17715	7.06188e-37	1.59595e-35	TRUE
ENSG00000082258.13	CCNT2	6.68146	1.73706e-56	9.97814e-55	TRUE	7.55423	9.01629e-42	2.94506e-40	TRUE
ENSG00000115839.19	RAB3GAP1	4.85358	1.60798e-29	1.79847e-28	TRUE	5.29455	4.25083e-30	5.98494e-29	TRUE
ENSG00000048991.17	R3HDM1	6.84225	3.3637e-66	4.13051e-64	TRUE	6.85103	4.2807e-52	3.30464e-50	TRUE
ENSG00000144224.17	UBXN4	7.56148	1.32147e-49	4.80486e-48	TRUE	7.10548	5.48447e-49	3.26766e-47	TRUE
ENSG00000076003.5	MCM6	5.7388	9.33829e-37	1.53877e-35	TRUE	6.13479	1.40003e-33	2.46421e-32	TRUE
ENSG00000115866.11	DARS1	5.95938	1.04516e-35	1.62618e-34	TRUE	7.21895	4.43391e-33	7.581e-32	TRUE
ENSG00000144228.9	SPOPL	7.28077	4.29477e-40	8.5218e-39	TRUE	7.06603	3.32364e-35	6.57785e-34	TRUE
ENSG00000169554.23	ZEB2	5.35609	7.43818e-46	2.08381e-44	TRUE	4.76493	1.16173e-29	1.59174e-28	TRUE
ENSG00000115947.14	ORC4	5.62832	9.74154e-31	1.16824e-29	TRUE	5.9072	8.38504e-30	1.16191e-28	TRUE
ENSG00000204406.14	MBD5	5.04813	1.9064e-26	1.84861e-25	TRUE	4.31373	1.12181e-15	7.14829e-15	TRUE
ENSG00000135999.12	EPC2	7.42174	1.08424e-47	3.42861e-46	TRUE	7.499	2.03708e-40	5.97479e-39	TRUE
ENSG00000168280.18	KIF5C	3.17799	4.28081e-16	2.65297e-15	TRUE	3.60666	7.31429e-15	4.47001e-14	TRUE
ENSG00000168288.13	MMADHC	7.32864	1.49998e-26	1.46302e-25	TRUE	6.16648	4.34069e-24	4.36866e-23	TRUE
ENSG00000115963.14	RND3	6.06575	7.08809e-32	9.00034e-31	TRUE	10.6412	6.27082e-14	3.63608e-13	TRUE
ENSG00000080345.18	RIF1	6.94058	4.6218e-71	7.89827e-69	TRUE	6.80705	3.01806e-57	3.82721e-55	TRUE
ENSG00000162980.17	ARL5A	8.31334	3.97049e-44	9.97828e-43	TRUE	7.7767	9.61626e-46	4.3215e-44	TRUE
ENSG00000283228.1	ENSG00000283228	6.95803	2.14499e-24	1.88706e-23	FALSE	7.0739	1.6896e-21	1.4636e-20	TRUE
ENSG00000182389.20	CACNB4	3.35658	1.45376e-13	8.07376e-13	TRUE	3.77022	3.91756e-11	1.97169e-10	TRUE
ENSG00000115145.10	STAM2	6.12368	4.33701e-26	4.13286e-25	TRUE	6.72818	8.1591e-20	6.46658e-19	TRUE
ENSG00000157827.20	FMNL2	6.26883	6.24884e-32	7.95684e-31	TRUE	6.35738	1.94989e-26	2.23698e-25	TRUE
ENSG00000196504.20	PRPF40A	6.83376	3.05463e-52	1.33279e-50	TRUE	6.55569	5.30189e-52	4.07459e-50	TRUE
ENSG00000115159.16	GPD2	7.0855	1.04012e-41	2.2776e-40	TRUE	6.58427	3.00502e-32	4.84072e-31	TRUE
ENSG00000144283.23	PKP4	5.47919	1.93883e-36	3.12575e-35	TRUE	5.8575	3.70028e-36	7.91901e-35	TRUE
ENSG00000115183.15	TANC1	5.04615	7.45158e-30	8.50596e-29	TRUE	4.83242	2.16325e-21	1.86538e-20	TRUE
ENSG00000123636.19	BAZ2B	4.19643	2.7827e-23	2.34064e-22	TRUE	4.95506	1.56287e-16	1.04107e-15	TRUE
ENSG00000136536.15	MARCHF7	9.13416	8.38739e-63	7.85389e-61	TRUE	8.40095	1.84477e-58	2.68465e-56	TRUE
ENSG00000153250.21	RBMS1	5.82711	5.04734e-37	8.4806e-36	TRUE	5.96007	6.51823e-29	8.59687e-28	TRUE
ENSG00000115233.12	PSMD14	5.03934	9.02782e-24	7.73162e-23	FALSE	6.45153	7.32263e-25	7.70306e-24	TRUE
ENSG00000182263.14	FIGN	7.46949	5.0038e-46	1.41829e-44	TRUE	6.89712	1.86813e-35	3.78485e-34	TRUE
ENSG00000082438.18	COBLL1	4.7154	1.00369e-23	8.57253e-23	TRUE	5.53254	3.80929e-23	3.6522e-22	TRUE
ENSG00000178662.16	CSRNP3	5.30612	6.66975e-23	5.51852e-22	TRUE	4.47457	2.97119e-15	1.85288e-14	FALSE
ENSG00000172292.15	CERS6	7.93005	1.90489e-48	6.41966e-47	TRUE	7.6692	4.58365e-41	1.40841e-39	TRUE
ENSG00000227617.9	CERS6-AS1	7.75154	2.56656e-30	3.00843e-29	TRUE	7.14576	1.55291e-23	1.52259e-22	TRUE
ENSG00000138398.17	PPIG	5.71697	3.88712e-41	8.23057e-40	TRUE	6.18552	1.21268e-41	3.89413e-40	TRUE
ENSG00000213160.10	KLHL23	8.08515	3.43528e-41	7.29646e-40	TRUE	7.19491	8.81983e-30	1.21871e-28	TRUE
ENSG00000138385.16	SSB	5.17392	8.50542e-28	8.76706e-27	TRUE	5.61961	1.22269e-27	1.49928e-26	TRUE
ENSG00000144357.18	UBR3	5.87707	2.35009e-31	2.91992e-30	TRUE	6.46742	8.08086e-32	1.26479e-30	TRUE
ENSG00000115806.13	GORASP2	7.7057	4.01977e-63	3.88837e-61	TRUE	6.98592	1.34291e-37	3.20491e-36	TRUE
ENSG00000198586.14	TLK1	7.41066	2.13149e-61	1.79141e-59	TRUE	6.67751	1.5302e-49	9.48033e-48	TRUE
ENSG00000123600.21	METTL8	5.63896	1.29192e-28	1.38347e-27	TRUE	5.21341	1.27585e-16	8.52367e-16	TRUE
ENSG00000115827.14	DCAF17	7.52669	2.716e-36	4.35473e-35	TRUE	5.83562	1.42756e-31	2.20213e-30	TRUE
ENSG00000128708.13	HAT1	5.47469	3.25836e-28	3.42663e-27	TRUE	5.57325	1.27789e-27	1.56416e-26	TRUE
ENSG00000115844.11	DLX2	7.73971	2.83108e-33	3.86918e-32	TRUE	7.58195	2.78732e-21	2.38906e-20	TRUE
ENSG00000152256.14	PDK1	6.26414	1.95072e-35	2.98979e-34	TRUE	5.30501	2.16906e-24	2.2183e-23	TRUE
ENSG00000091436.17	MAP3K20	6.1778	3.34595e-36	5.34597e-35	TRUE	5.72102	1.79044e-31	2.7421e-30	TRUE
ENSG00000144354.15	CDCA7	7.64927	5.87021e-59	4.05321e-57	TRUE	7.24725	1.00287e-44	4.18258e-43	TRUE
ENSG00000172845.18	SP3	7.21547	1.50031e-76	4.12979e-74	TRUE	6.97073	5.43756e-56	6.0771e-54	TRUE
ENSG00000138430.16	OLA1	5.81756	6.21804e-40	1.22668e-38	TRUE	5.72393	2.5131e-37	5.88264e-36	TRUE
ENSG00000115935.18	WIPF1	4.86434	9.95719e-26	9.32384e-25	TRUE	5.49136	3.61217e-17	2.48356e-16	TRUE
ENSG00000115966.18	ATF2	7.16754	5.9659e-53	2.72175e-51	TRUE	7.68254	5.68713e-40	1.60739e-38	TRUE
ENSG00000154518.10	ATP5MC3	6.85428	3.14347e-25	2.87589e-24	TRUE	6.44343	7.11484e-26	7.92833e-25	TRUE
ENSG00000144320.14	LNPK	6.99446	1.81704e-45	4.99156e-44	TRUE	6.65391	3.33019e-40	9.57051e-39	TRUE
ENSG00000128714.6	HOXD13	8.75246	1.57157e-50	6.11541e-49	TRUE	7.97102	2.12259e-39	5.76572e-38	TRUE
ENSG00000128710.6	HOXD10	6.76162	4.82731e-30	5.57868e-29	TRUE	8.14673	3.23733e-18	2.35811e-17	TRUE
ENSG00000170144.21	HNRNPA3	6.76048	3.35636e-76	8.99723e-74	TRUE	6.76652	3.34733e-68	1.13435e-65	TRUE
ENSG00000116044.16	NFE2L2	7.00525	6.79018e-36	1.0658e-34	TRUE	6.65647	6.39603e-39	1.67103e-37	TRUE
ENSG00000018510.18	AGPS	6.51493	3.78503e-44	9.52388e-43	TRUE	6.28334	1.01969e-43	3.92265e-42	TRUE
ENSG00000180228.14	PRKRA	5.26494	1.06845e-23	9.11802e-23	TRUE	4.65721	4.94643e-19	3.7525e-18	TRUE
ENSG00000116095.11	PLEKHA3	6.46403	1.13269e-46	3.33975e-45	TRUE	6.12835	3.4276e-39	9.15071e-38	TRUE
ENSG00000155657.29	TTN	2.33276	3.19224e-09	1.44606e-08	TRUE	2.4787	2.54718e-07	1.03188e-06	TRUE
ENSG00000187231.14	SESTD1	6.23356	1.28147e-35	1.98184e-34	TRUE	6.22064	4.18451e-32	6.6654e-31	TRUE
ENSG00000163510.14	CWC22	6.71225	7.44876e-34	1.05165e-32	TRUE	6.81479	1.35503e-32	2.22684e-31	TRUE
ENSG00000170035.16	UBE2E3	6.77356	7.18125e-29	7.77539e-28	TRUE	7.54984	1.77495e-25	1.93626e-24	TRUE
ENSG00000138434.17	ITPRID2	7.23835	7.27156e-51	2.91816e-49	TRUE	7.45021	3.57977e-45	1.55757e-43	TRUE
ENSG00000077232.19	DNAJC10	5.11727	3.73537e-32	4.81617e-31	TRUE	5.3889	3.08814e-33	5.32315e-32	TRUE
ENSG00000061676.15	NCKAP1	6.50714	1.04049e-60	8.33491e-59	TRUE	6.65096	1.86269e-51	1.34677e-49	TRUE
ENSG00000065548.18	ZC3H15	5.85099	4.04275e-37	6.83187e-36	TRUE	7.30309	2.40904e-42	8.20585e-41	TRUE
ENSG00000144369.14	FAM171B	6.85649	1.07479e-35	1.66975e-34	TRUE	6.83105	3.46175e-26	3.92404e-25	TRUE
ENSG00000115368.10	WDR75	5.1291	6.15627e-24	5.30894e-23	TRUE	5.2499	1.31362e-23	1.29205e-22	TRUE
ENSG00000138381.10	ASNSD1	7.26382	1.9768e-34	2.87302e-33	TRUE	8.87318	3.66059e-21	3.11182e-20	TRUE
ENSG00000128699.14	ORMDL1	7.63438	1.7948e-26	1.7427e-25	TRUE	6.99882	1.00654e-26	1.17243e-25	TRUE
ENSG00000138386.17	NAB1	6.92437	1.66395e-32	2.17906e-31	TRUE	7.21605	1.05107e-29	1.44418e-28	TRUE
ENSG00000115419.13	GLS	8.69424	3.98964e-21	3.07808e-20	TRUE	6.34068	2.55146e-25	2.75782e-24	TRUE
ENSG00000115415.20	STAT1	6.21379	6.70482e-29	7.27106e-28	TRUE	5.69297	3.06798e-25	3.30255e-24	TRUE
ENSG00000128641.19	MYO1B	4.28134	2.43189e-21	1.89155e-20	FALSE	4.95519	3.58511e-21	3.04917e-20	TRUE
ENSG00000196950.14	SLC39A10	7.17225	5.85672e-36	9.2281e-35	TRUE	6.86783	2.51237e-35	5.05118e-34	TRUE
ENSG00000081320.11	STK17B	7.01221	1.47574e-36	2.39517e-35	TRUE	7.28207	3.50622e-28	4.42143e-27	TRUE
ENSG00000119041.11	GTF3C3	6.01614	5.68362e-28	5.92096e-27	TRUE	5.66572	3.86418e-26	4.37152e-25	TRUE
ENSG00000197121.15	PGAP1	6.91932	1.03733e-35	1.61462e-34	TRUE	6.57204	6.46791e-29	8.53379e-28	TRUE
ENSG00000115524.17	SF3B1	5.77008	8.0722e-48	2.57044e-46	TRUE	6.01599	5.96511e-43	2.13837e-41	TRUE
ENSG00000115520.9	COQ10B	6.22339	1.61961e-28	1.72717e-27	TRUE	7.17775	4.63487e-22	4.15813e-21	TRUE
ENSG00000144381.18	HSPD1	6.76579	6.52275e-64	6.75566e-62	TRUE	6.50666	7.75215e-63	1.62648e-60	TRUE
ENSG00000115540.15	MOB4	7.4289	1.04057e-36	1.70711e-35	TRUE	8.05783	2.07679e-31	3.1764e-30	TRUE
ENSG00000119042.17	SATB2	6.81046	6.94963e-53	3.14952e-51	TRUE	7.23097	2.04645e-49	1.25649e-47	TRUE
ENSG00000178074.6	C2orf69	7.28821	2.66525e-42	6.02273e-41	TRUE	8.25453	7.42349e-36	1.55181e-34	TRUE
ENSG00000162971.11	TYW5	5.48669	5.71009e-26	5.40613e-25	FALSE	6.10222	6.90168e-22	6.11795e-21	TRUE
ENSG00000163535.18	SGO2	6.69337	2.65502e-24	2.32677e-23	FALSE	6.30586	1.59254e-22	1.47039e-21	TRUE
ENSG00000082153.18	BZW1	7.4156	7.66877e-60	5.76057e-58	TRUE	6.98855	6.14188e-55	6.27004e-53	TRUE
ENSG00000013441.17	CLK1	4.93697	1.43485e-26	1.40116e-25	TRUE	5.53356	3.68495e-24	3.72734e-23	TRUE
ENSG00000115942.9	ORC2	6.18132	2.84241e-38	5.12659e-37	TRUE	6.23227	4.47584e-28	5.60899e-27	TRUE
ENSG00000155744.10	FAM126B	7.26418	5.47887e-56	3.04899e-54	TRUE	7.72442	3.56688e-46	1.67791e-44	TRUE
ENSG00000003402.21	CFLAR	4.05882	7.02615e-22	5.57066e-21	TRUE	3.97619	1.99667e-13	1.13166e-12	FALSE
ENSG00000115993.13	TRAK2	3.9748	2.47562e-22	1.99951e-21	TRUE	4.33205	1.11771e-20	9.26431e-20	TRUE
ENSG00000082146.13	STRADB	6.93777	1.67999e-28	1.79015e-27	TRUE	6.45888	3.67062e-31	5.50819e-30	TRUE
ENSG00000155755.20	TMEM237	5.83999	1.80304e-27	1.83681e-26	TRUE	6.72299	8.39609e-24	8.34703e-23	TRUE
ENSG00000003393.16	ALS2	4.15487	4.87597e-25	4.41658e-24	TRUE	3.83173	8.95871e-16	5.73851e-15	TRUE
ENSG00000116030.17	SUMO1	7.27753	1.09814e-49	4.0106e-48	TRUE	7.01262	1.60089e-30	2.30813e-29	TRUE
ENSG00000055044.11	NOP58	5.44704	4.81648e-34	6.86868e-33	TRUE	5.37577	2.08247e-31	3.18366e-30	TRUE
ENSG00000204217.16	BMPR2	7.12662	3.43254e-48	1.12987e-46	TRUE	7.33559	3.73551e-42	1.25492e-40	TRUE
ENSG00000138439.12	FAM117B	5.9596	1.01169e-08	4.47657e-08	TRUE	6.53478	3.50095e-21	2.98204e-20	TRUE
ENSG00000138442.11	WDR12	6.2467	1.64325e-34	2.39844e-33	TRUE	5.6282	1.89005e-21	1.63433e-20	TRUE
ENSG00000144426.19	NBEAL1	4.51315	8.3696e-25	7.49173e-24	TRUE	4.9604	3.03756e-19	2.33389e-18	TRUE
ENSG00000138443.17	ABI2	6.64647	2.07913e-67	2.78671e-65	TRUE	6.60932	7.52339e-41	2.26889e-39	TRUE
ENSG00000173166.18	RAPH1	6.75206	1.3869e-45	3.83561e-44	TRUE	6.95487	1.74562e-39	4.77587e-38	TRUE
ENSG00000114933.16	INO80D	7.3556	8.8075e-71	1.49269e-68	TRUE	6.71935	1.27191e-41	4.08049e-40	TRUE
ENSG00000023228.14	NDUFS1	6.49621	1.31034e-47	4.12767e-46	TRUE	6.79368	1.75867e-44	7.18575e-43	TRUE
ENSG00000114942.14	EEF1B2	5.46787	2.02485e-35	3.10225e-34	TRUE	5.31309	7.59741e-34	1.3639e-32	TRUE
ENSG00000204186.10	ZDBF2	6.17918	2.20901e-41	4.74845e-40	TRUE	7.24813	1.15609e-41	3.72289e-40	TRUE
ENSG00000118260.15	CREB1	7.10278	2.64116e-56	1.50034e-54	TRUE	6.52916	4.56854e-36	9.69227e-35	TRUE
ENSG00000163249.13	CCNYL1	7.0826	6.38758e-26	6.03363e-25	TRUE	5.63491	9.14702e-21	7.62787e-20	TRUE
ENSG00000163251.4	FZD5	6.51675	1.9574e-36	3.15445e-35	TRUE	6.00527	9.05191e-23	8.47894e-22	TRUE
ENSG00000178385.15	PLEKHM3	6.1469	2.74087e-45	7.42988e-44	TRUE	5.93157	4.53473e-29	6.02967e-28	TRUE
ENSG00000115020.17	PIKFYVE	6.27707	2.10484e-48	7.05872e-47	TRUE	6.62443	1.68014e-41	5.33016e-40	TRUE
ENSG00000197713.15	RPE	8.37131	5.02388e-33	6.78241e-32	TRUE	9.58552	9.1403e-24	9.06581e-23	TRUE
ENSG00000115365.12	LANCL1	8.27517	3.08198e-35	4.67126e-34	TRUE	8.45089	1.50536e-35	3.07538e-34	TRUE
ENSG00000138376.11	BARD1	6.56675	5.47574e-43	1.28333e-41	TRUE	6.41897	3.89194e-32	6.21965e-31	TRUE
ENSG00000138363.15	ATIC	6.29049	6.94212e-41	1.44824e-39	TRUE	5.85468	8.05928e-30	1.11813e-28	TRUE
ENSG00000079246.16	XRCC5	6.19665	6.14332e-51	2.48239e-49	TRUE	6.94145	1.93027e-49	1.18729e-47	TRUE
ENSG00000197756.10	RPL37A	4.67746	5.45015e-35	8.15216e-34	TRUE	4.83022	5.20782e-32	8.26461e-31	TRUE
ENSG00000163466.16	ARPC2	5.73498	3.6373e-33	4.94198e-32	TRUE	5.54943	3.55065e-30	5.02811e-29	TRUE
ENSG00000144579.8	CTDSP1	5.56478	1.66402e-32	2.17906e-31	TRUE	6.46761	2.83812e-27	3.40804e-26	TRUE
ENSG00000127831.11	VIL1	4.23569	5.17467e-20	3.80552e-19	TRUE	4.83469	1.0729e-18	8.01664e-18	TRUE
ENSG00000135913.11	USP37	7.19385	8.53956e-58	5.39663e-56	TRUE	8.47734	1.90938e-43	7.15214e-42	TRUE
ENSG00000144580.14	CNOT9	7.36771	9.05368e-67	1.15678e-64	TRUE	7.31853	3.3279e-47	1.67863e-45	TRUE
ENSG00000115568.16	ZNF142	5.84283	2.16558e-48	7.23872e-47	TRUE	5.2605	5.51806e-24	5.53408e-23	TRUE
ENSG00000135912.11	TTLL4	5.01984	1.10191e-31	1.38973e-30	TRUE	4.69858	4.27738e-20	3.44356e-19	TRUE
ENSG00000135903.20	PAX3	5.14848	4.24817e-32	5.46533e-31	TRUE	5.1321	3.64119e-18	2.64441e-17	TRUE
ENSG00000116120.11	FARSB	6.56654	1.03902e-43	2.54112e-42	TRUE	6.43165	1.60877e-36	3.52455e-35	TRUE
ENSG00000123983.15	ACSL3	5.71613	4.43178e-31	5.41936e-30	TRUE	5.8069	7.01049e-30	9.76187e-29	TRUE
ENSG00000085449.15	WDFY1	6.66238	2.16235e-41	4.65302e-40	TRUE	6.56978	2.08304e-33	3.62902e-32	TRUE
ENSG00000036257.14	CUL3	6.31695	2.60756e-41	5.58175e-40	TRUE	5.85449	2.25478e-33	3.92024e-32	TRUE
ENSG00000144468.17	RHBDD1	7.84344	4.55786e-38	8.13119e-37	TRUE	5.64841	3.22084e-25	3.45622e-24	TRUE
ENSG00000168958.20	MFF	7.49258	7.58176e-29	8.20255e-28	TRUE	5.84586	3.4654e-19	2.64935e-18	TRUE
ENSG00000173744.18	AGFG1	7.64372	1.07403e-58	7.22138e-57	TRUE	7.60607	2.68483e-46	1.27526e-44	TRUE
ENSG00000153827.14	TRIP12	6.30537	5.79709e-62	5.10218e-60	TRUE	6.58656	9.20781e-56	1.00286e-53	TRUE
ENSG00000135932.12	CAB39	7.68487	1.60587e-47	5.0086e-46	TRUE	8.51825	7.72976e-40	2.15796e-38	TRUE
ENSG00000173692.14	PSMD1	5.3057	2.01449e-32	2.62627e-31	TRUE	5.52713	6.52655e-32	1.02805e-30	TRUE
ENSG00000115053.17	NCL	4.74418	6.94036e-44	1.71477e-42	TRUE	4.86653	4.2281e-39	1.12265e-37	TRUE
ENSG00000187514.17	PTMA	7.16293	1.32508e-93	1.55277e-90	TRUE	6.89694	9.38848e-63	1.9342e-60	TRUE
ENSG00000144524.18	COPS7B	5.40548	1.18418e-28	1.26909e-27	TRUE	6.01565	2.95138e-26	3.35664e-25	TRUE
ENSG00000135930.15	EIF4E2	5.07872	1.24378e-31	1.56576e-30	TRUE	5.16312	2.98236e-22	2.7054e-21	TRUE
ENSG00000204120.16	GIGYF2	5.72404	3.71532e-44	9.35421e-43	TRUE	5.55112	1.43165e-26	1.6552e-25	TRUE
ENSG00000077044.11	DGKD	3.73661	3.44953e-17	2.24427e-16	FALSE	4.32496	4.23087e-15	2.61885e-14	TRUE
ENSG00000123485.12	HJURP	5.47739	1.80752e-28	1.92255e-27	FALSE	5.96501	2.19432e-15	1.37694e-14	TRUE
ENSG00000188042.8	ARL4C	7.19566	5.69167e-08	2.41554e-07	TRUE	10.6033	1.34854e-13	7.70057e-13	TRUE
ENSG00000130147.16	SH3BP4	6.24169	2.84513e-34	4.10881e-33	TRUE	5.94174	1.13851e-19	8.95904e-19	TRUE
ENSG00000157985.19	AGAP1	5.65987	1.27441e-40	2.61867e-39	TRUE	5.69201	1.13222e-32	1.8742e-31	TRUE
ENSG00000198612.11	COPS8	7.19776	5.61726e-42	1.25006e-40	TRUE	7.35752	5.92219e-32	9.36785e-31	TRUE
ENSG00000124831.19	LRRFIP1	5.72652	1.69027e-41	3.66409e-40	TRUE	5.43228	1.28625e-33	2.27095e-32	TRUE
ENSG00000132326.12	PER2	4.41219	3.69538e-24	3.21994e-23	TRUE	4.23396	1.37984e-13	7.8767e-13	FALSE
ENSG00000204104.12	TRAF3IP1	4.78532	6.63221e-22	5.26851e-21	FALSE	5.56108	1.44147e-23	1.41495e-22	TRUE
ENSG00000065802.12	ASB1	5.65932	3.14533e-28	3.31031e-27	FALSE	5.97318	5.5427e-27	6.54314e-26	TRUE
ENSG00000130414.13	NDUFA10	3.75066	3.85999e-17	2.50695e-16	TRUE	3.9745	8.68373e-13	4.77375e-12	TRUE
ENSG00000115677.18	HDLBP	6.21188	1.03915e-61	8.99147e-60	TRUE	6.11774	2.92344e-47	1.48557e-45	TRUE
ENSG00000168385.18	SEPTIN2	7.99069	4.69761e-82	2.43883e-79	TRUE	8.25791	1.56353e-60	2.67356e-58	TRUE
ENSG00000006607.14	FARP2	5.6233	1.9231e-40	3.90853e-39	TRUE	6.08614	2.22585e-31	3.3983e-30	TRUE
ENSG00000115694.15	STK25	4.64637	2.57649e-22	2.08016e-21	FALSE	5.41818	1.00222e-20	8.33532e-20	TRUE
ENSG00000134107.5	BHLHE40	6.82891	4.82208e-32	6.18427e-31	TRUE	5.93174	4.75289e-18	3.43065e-17	TRUE
ENSG00000134108.14	ARL8B	12.0811	8.41839e-18	5.6087e-17	TRUE	8.91113	9.3993e-40	2.61552e-38	TRUE
ENSG00000134109.11	EDEM1	6.71877	3.32692e-41	7.06997e-40	TRUE	6.74276	1.09681e-36	2.43729e-35	TRUE
ENSG00000070950.10	RAD18	7.28907	1.5387e-54	7.87866e-53	TRUE	6.7185	1.36683e-42	4.7601e-41	TRUE
ENSG00000134077.16	THUMPD3	5.74688	5.63193e-38	9.99516e-37	TRUE	5.241	5.76626e-22	5.14615e-21	TRUE
ENSG00000168137.20	SETD5	6.73974	2.31515e-81	1.07902e-78	TRUE	6.65797	1.7813e-62	3.5625e-60	TRUE
ENSG00000144554.13	FANCD2	4.4787	1.04209e-28	1.11886e-27	TRUE	4.41362	2.33841e-21	2.01388e-20	TRUE
ENSG00000254999.4	BRK1	6.7284	1.3541e-33	1.87879e-32	TRUE	6.97151	1.01273e-27	1.24583e-26	TRUE
ENSG00000134086.9	VHL	6.90743	9.21268e-40	1.80271e-38	TRUE	8.11831	2.02578e-35	4.09695e-34	TRUE
ENSG00000157014.11	TATDN2	5.36508	1.26268e-29	1.42352e-28	TRUE	7.21752	3.5134e-31	5.2885e-30	TRUE
ENSG00000197548.13	ATG7	4.77202	5.9899e-24	5.16982e-23	FALSE	4.64749	2.82071e-16	1.85119e-15	TRUE
ENSG00000144560.16	VGLL4	5.6879	8.09612e-38	1.42758e-36	TRUE	6.02775	3.01645e-32	4.85685e-31	TRUE
ENSG00000075975.17	MKRN2	6.7879	1.859e-40	3.78575e-39	TRUE	6.60804	6.75648e-34	1.21934e-32	TRUE
ENSG00000132155.14	RAF1	5.38156	5.54713e-47	1.66173e-45	TRUE	5.27943	3.16953e-31	4.78775e-30	TRUE
ENSG00000144713.13	RPL32	5.97259	5.34219e-53	2.45083e-51	TRUE	5.82176	1.22908e-49	7.69843e-48	TRUE
ENSG00000144711.16	IQSEC1	5.64841	5.38507e-43	1.2628e-41	TRUE	5.58251	1.87178e-23	1.8279e-22	TRUE
ENSG00000132182.13	NUP210	4.33258	1.25709e-24	1.1155e-23	TRUE	4.47479	5.21175e-21	4.40091e-20	TRUE
ENSG00000163528.13	CHCHD4	6.40724	5.02561e-25	4.55012e-24	FALSE	7.47836	6.74657e-19	5.08207e-18	TRUE
ENSG00000170876.8	TMEM43	6.92364	3.52537e-32	4.54971e-31	TRUE	5.5127	5.92833e-20	4.73809e-19	TRUE
ENSG00000225733.7	FGD5-AS1	8.59363	5.41225e-58	3.4576e-56	TRUE	8.84714	3.46537e-51	2.45876e-49	TRUE
ENSG00000177463.16	NR2C2	6.51604	1.49028e-49	5.38048e-48	TRUE	6.46382	4.11948e-40	1.17402e-38	TRUE
ENSG00000131368.9	MRPS25	5.60592	1.1155e-45	3.09549e-44	TRUE	5.86735	2.57988e-38	6.45422e-37	TRUE
ENSG00000131381.12	RBSN	5.52097	2.51745e-41	5.39733e-40	TRUE	6.19925	1.3491e-39	3.72081e-38	TRUE
ENSG00000131375.10	CAPN7	6.33723	1.71966e-38	3.14586e-37	TRUE	6.50587	2.65275e-32	4.29349e-31	TRUE
ENSG00000144597.14	EAF1	7.33863	1.53299e-53	7.28554e-52	TRUE	7.03817	1.12322e-39	3.11288e-38	TRUE
ENSG00000249786.7	EAF1-AS1	4.946	1.63362e-23	1.38518e-22	FALSE	4.88303	3.66757e-16	2.39274e-15	TRUE
ENSG00000206560.12	ANKRD28	6.76702	2.17906e-43	5.21729e-42	TRUE	5.84879	3.47091e-31	5.22684e-30	TRUE
ENSG00000154813.10	DPH3	8.85612	5.40162e-22	4.30513e-21	TRUE	7.39909	1.61306e-28	2.07309e-27	TRUE
ENSG00000131374.15	TBC1D5	4.1743	2.1572e-18	1.4773e-17	FALSE	4.29926	6.19226e-17	4.20427e-16	TRUE
ENSG00000182568.17	SATB1	5.33609	1.11767e-31	1.40916e-30	TRUE	6.14553	4.58983e-27	5.44837e-26	TRUE
ENSG00000144566.11	RAB5A	7.20298	2.75855e-57	1.68865e-55	TRUE	7.14808	3.54634e-41	1.09856e-39	TRUE
ENSG00000114166.8	KAT2B	5.37504	5.49209e-31	6.67613e-30	TRUE	6.28872	1.05203e-05	3.81612e-05	TRUE
ENSG00000129810.15	SGO1	6.53932	2.18995e-35	3.34767e-34	TRUE	6.8726	4.29062e-20	3.4534e-19	TRUE
ENSG00000170142.12	UBE2E1	5.91824	2.29756e-34	3.32976e-33	TRUE	5.81058	1.85946e-22	1.71038e-21	TRUE
ENSG00000197885.11	NKIRAS1	7.04517	3.24011e-39	6.13243e-38	TRUE	6.93462	1.46247e-29	1.99421e-28	TRUE
ENSG00000174748.22	RPL15	6.65769	1.83675e-81	8.65888e-79	TRUE	6.63568	5.1769e-70	2.21306e-67	TRUE
ENSG00000174738.13	NR1D2	6.65247	4.87665e-42	1.0882e-40	TRUE	6.5326	8.63492e-43	3.06333e-41	TRUE
ENSG00000077097.16	TOP2B	6.73387	9.96869e-42	2.18874e-40	TRUE	6.53343	3.53077e-40	1.01214e-38	TRUE
ENSG00000033867.17	SLC4A7	6.47917	9.94303e-37	1.63317e-35	TRUE	6.21159	1.04309e-30	1.51734e-29	TRUE
ENSG00000163512.14	AZI2	5.35059	7.0352e-30	8.03962e-29	TRUE	7.04546	8.62218e-24	8.56682e-23	TRUE
ENSG00000163527.10	STT3B	8.08335	9.30194e-49	3.20866e-47	TRUE	6.9611	6.19122e-38	1.507e-36	TRUE
ENSG00000152642.11	GPD1L	6.32394	6.01093e-35	8.97134e-34	TRUE	6.31335	5.14801e-19	3.90283e-18	TRUE
ENSG00000091317.8	CMTM6	8.74116	2.52984e-31	3.13471e-30	TRUE	8.10001	4.06406e-36	8.67431e-35	TRUE
ENSG00000182973.20	CNOT10	5.4334	3.24055e-33	4.41116e-32	TRUE	5.98184	1.62657e-29	2.21181e-28	TRUE
ENSG00000206557.6	TRIM71	7.05428	2.33926e-38	4.24712e-37	TRUE	6.0976	5.40238e-33	9.16903e-32	TRUE
ENSG00000170275.15	CRTAP	5.82341	9.79328e-41	2.02655e-39	TRUE	5.40772	7.54487e-31	1.11075e-29	TRUE
ENSG00000153560.12	UBP1	7.29338	3.74877e-61	3.09984e-59	TRUE	6.57222	7.11694e-47	3.53254e-45	TRUE
ENSG00000163539.18	CLASP2	4.98319	1.08855e-36	1.78227e-35	TRUE	5.7914	7.79584e-37	1.75864e-35	TRUE
ENSG00000170248.15	PDCD6IP	7.09249	3.68046e-45	9.91029e-44	TRUE	6.90114	8.52592e-45	3.56888e-43	TRUE
ENSG00000093167.18	LRRFIP2	4.13769	2.45708e-22	1.98571e-21	TRUE	4.47587	9.31509e-20	7.3606e-19	TRUE
ENSG00000144674.17	GOLGA4	6.50108	1.77567e-63	1.76766e-61	TRUE	6.71579	4.94199e-36	1.04392e-34	TRUE
ENSG00000144677.15	CTDSPL	6.63824	7.17738e-41	1.4958e-39	TRUE	6.34115	1.70936e-25	1.86768e-24	TRUE
ENSG00000172939.9	OXSR1	6.11783	8.40563e-39	1.55995e-37	TRUE	6.19972	6.45662e-38	1.56937e-36	TRUE
ENSG00000114739.14	ACVR2B	6.32548	3.64423e-68	5.24436e-66	TRUE	6.87517	4.58304e-54	4.24757e-52	TRUE
ENSG00000114742.14	WDR48	6.87182	1.40613e-47	4.41923e-46	TRUE	6.54517	2.25949e-36	4.90619e-35	TRUE
ENSG00000114745.15	GORASP1	4.24913	9.26038e-24	7.92582e-23	TRUE	4.39122	1.45352e-17	1.02051e-16	TRUE
ENSG00000168028.14	RPSA	6.29391	2.07495e-79	7.80751e-77	TRUE	6.57509	2.07692e-74	1.47976e-71	TRUE
ENSG00000114784.4	EIF1B	6.83689	8.82117e-38	1.55275e-36	TRUE	7.01302	5.54813e-33	9.41173e-32	TRUE
ENSG00000188846.14	RPL14	5.75887	1.28087e-58	8.54203e-57	TRUE	5.60832	3.53372e-50	2.3107e-48	TRUE
ENSG00000177842.12	ZNF620	7.71044	3.44062e-37	5.83115e-36	TRUE	7.32919	1.20237e-30	1.74311e-29	TRUE
ENSG00000172888.12	ZNF621	6.29705	1.80974e-46	5.2567e-45	TRUE	5.84851	1.7312e-30	2.48866e-29	TRUE
ENSG00000168036.18	CTNNB1	5.71351	1.78549e-48	6.04209e-47	TRUE	5.33477	1.00767e-34	1.91451e-33	TRUE
ENSG00000182606.17	TRAK1	4.97634	1.57318e-27	1.60511e-26	TRUE	5.30172	1.58686e-30	2.28983e-29	TRUE
ENSG00000093183.14	SEC22C	5.55642	2.89372e-38	5.21683e-37	TRUE	6.35748	2.88935e-34	5.32972e-33	TRUE
ENSG00000114857.19	NKTR	6.93744	4.09792e-58	2.63024e-56	TRUE	6.7465	2.27909e-52	1.81262e-50	TRUE
ENSG00000181061.14	HIGD1A	6.11876	1.61618e-35	2.48728e-34	TRUE	7.78982	9.85513e-29	1.28346e-27	TRUE
ENSG00000163788.14	SNRK	7.24963	7.1219e-43	1.65682e-41	TRUE	6.73478	1.40442e-36	3.0967e-35	TRUE
ENSG00000011198.10	ABHD5	7.3798	6.64892e-35	9.90551e-34	TRUE	6.70009	5.04553e-28	6.30212e-27	TRUE
ENSG00000179152.20	TCAIM	6.41476	6.29882e-37	1.0523e-35	TRUE	6.1204	5.43243e-27	6.42183e-26	TRUE
ENSG00000185219.18	ZNF445	4.92305	1.35608e-34	1.98849e-33	TRUE	5.33674	4.8104e-28	6.01723e-27	TRUE
ENSG00000186448.15	ZNF197	5.44971	5.79761e-29	6.31227e-28	FALSE	5.13853	1.07523e-22	1.0025e-21	TRUE
ENSG00000163807.6	KIAA1143	7.49514	1.47794e-44	3.79325e-43	TRUE	7.45396	1.37764e-34	2.58583e-33	TRUE
ENSG00000163812.15	ZDHHC3	5.33861	1.48937e-41	3.24059e-40	TRUE	5.30632	4.36317e-31	6.51598e-30	TRUE
ENSG00000011376.12	LARS2	4.44419	2.84435e-21	2.20651e-20	TRUE	3.89986	3.46815e-13	1.94311e-12	TRUE
ENSG00000144791.10	LIMD1	5.02047	7.65351e-36	1.1981e-34	TRUE	5.15584	2.74775e-20	2.23207e-19	TRUE
ENSG00000230530.2	LIMD1-AS1	5.62866	2.07305e-28	2.20042e-27	TRUE	5.90905	7.29853e-21	6.11621e-20	TRUE
ENSG00000211456.13	SACM1L	5.64094	1.1997e-34	1.76361e-33	TRUE	5.77366	3.34693e-29	4.49045e-28	TRUE
ENSG00000163818.19	LZTFL1	6.74104	4.23181e-27	4.23326e-26	TRUE	7.16239	2.39213e-21	2.05808e-20	TRUE
ENSG00000163820.16	FYCO1	6.49323	8.31882e-31	1.00114e-29	TRUE	5.01271	3.07426e-26	3.4906e-25	TRUE
ENSG00000181555.22	SETD2	6.60557	4.83223e-70	7.68174e-68	TRUE	7.03853	1.34851e-48	7.79015e-47	TRUE
ENSG00000114648.12	KLHL18	5.64508	1.81873e-34	2.64891e-33	TRUE	5.02452	7.63512e-26	8.50533e-25	TRUE
ENSG00000114650.21	SCAP	4.01045	1.5799e-15	9.5235e-15	TRUE	4.17132	1.17073e-11	6.07183e-11	TRUE
ENSG00000173473.11	SMARCC1	6.03742	5.59178e-60	4.25494e-58	TRUE	5.54732	6.1833e-45	2.62687e-43	TRUE
ENSG00000132153.15	DHX30	4.40759	8.499e-25	7.60589e-24	FALSE	4.10061	5.50936e-16	3.56171e-15	TRUE
ENSG00000047849.22	MAP4	4.72416	7.4371e-33	9.95188e-32	TRUE	4.66871	1.2249e-18	9.13043e-18	TRUE
ENSG00000164045.12	CDC25A	6.08369	4.60175e-50	1.73471e-48	TRUE	6.30643	1.07427e-44	4.46945e-43	TRUE
ENSG00000172113.10	NME6	4.75138	9.42787e-26	8.84232e-25	FALSE	5.49997	4.07307e-24	4.109e-23	TRUE
ENSG00000164054.17	SHISA5	6.13873	6.28807e-45	1.66279e-43	TRUE	6.34626	3.44776e-34	6.33585e-33	TRUE
ENSG00000114302.16	PRKAR2A	7.66896	6.97294e-63	6.55936e-61	TRUE	7.64366	8.90468e-51	6.07784e-49	TRUE
ENSG00000177479.20	ARIH2	5.51525	2.21594e-43	5.30247e-42	TRUE	5.42539	4.36057e-35	8.55086e-34	TRUE
ENSG00000178035.13	IMPDH2	5.46151	5.37451e-34	7.64586e-33	TRUE	6.31673	5.10377e-37	1.16362e-35	TRUE
ENSG00000198218.11	QRICH1	5.90641	5.96581e-48	1.91607e-46	TRUE	5.80135	7.65703e-35	1.46702e-33	TRUE
ENSG00000067560.14	RHOA	8.39635	3.80056e-75	9.27835e-73	TRUE	6.80415	1.96867e-48	1.11284e-46	TRUE
ENSG00000173402.12	DAG1	6.04283	2.30314e-37	3.93916e-36	TRUE	6.36315	5.403e-32	8.5664e-31	TRUE
ENSG00000176095.12	IP6K1	5.15902	6.64481e-36	1.04418e-34	TRUE	7.27267	2.12251e-30	3.04096e-29	TRUE
ENSG00000004534.15	RBM6	4.94095	8.1741e-29	8.82243e-28	TRUE	4.08107	2.45165e-17	1.7e-16	TRUE
ENSG00000114353.17	GNAI2	4.95379	1.25646e-26	1.23166e-25	TRUE	5.24627	1.52133e-16	1.01399e-15	FALSE
ENSG00000259956.2	RBM15B	6.66737	2.40426e-56	1.37147e-54	TRUE	6.90918	6.17212e-46	2.82571e-44	TRUE
ENSG00000145041.16	DCAF1	4.58531	2.85107e-22	2.29597e-21	TRUE	5.13687	7.78776e-24	7.76479e-23	TRUE
ENSG00000164080.14	RAD54L2	5.18609	1.10684e-37	1.93175e-36	TRUE	5.75468	6.62753e-38	1.60976e-36	TRUE
ENSG00000162244.12	RPL29	5.77584	9.63125e-54	4.64179e-52	TRUE	6.02998	6.67102e-51	4.63704e-49	TRUE
ENSG00000164086.10	DUSP7	6.88629	1.24018e-39	2.41258e-38	TRUE	6.7913	6.59817e-30	9.20272e-29	TRUE
ENSG00000164091.12	WDR82	7.3537	2.80405e-71	4.89384e-69	TRUE	7.98679	8.75833e-61	1.52936e-58	TRUE
ENSG00000163930.10	BAP1	5.60552	3.6778e-35	5.5579e-34	TRUE	5.15945	1.92472e-26	2.20884e-25	TRUE
ENSG00000168268.11	NT5DC2	6.16035	4.05415e-40	8.06387e-39	TRUE	6.23041	6.47281e-33	1.09315e-31	TRUE
ENSG00000163939.18	PBRM1	6.19712	1.43163e-36	2.32543e-35	TRUE	5.92814	1.08864e-38	2.78463e-37	TRUE
ENSG00000163938.17	GNL3	6.12847	5.71476e-37	9.57065e-36	TRUE	5.90503	1.01576e-32	1.68876e-31	TRUE
ENSG00000016864.19	GLT8D1	5.98328	1.68698e-28	1.79714e-27	TRUE	6.29274	4.84584e-20	3.89112e-19	TRUE
ENSG00000114902.14	SPCS1	6.29721	2.1148e-31	2.63317e-30	TRUE	6.83922	1.52369e-26	1.75983e-25	TRUE
ENSG00000114904.13	NEK4	6.90453	8.33128e-41	1.72837e-39	TRUE	6.52814	2.53478e-34	4.68579e-33	TRUE
ENSG00000163935.14	SFMBT1	5.83919	5.56943e-33	7.49424e-32	TRUE	5.76774	3.78996e-29	5.06894e-28	TRUE
ENSG00000163931.17	TKT	4.06729	2.24976e-26	2.17212e-25	TRUE	4.27125	1.0326e-15	6.59455e-15	TRUE
ENSG00000272886.6	DCP1A	7.09644	3.12386e-54	1.5682e-52	TRUE	7.68663	1.95003e-35	3.9461e-34	TRUE
ENSG00000114251.15	WNT5A	6.52264	1.99129e-39	3.82175e-38	TRUE	6.82735	4.35105e-24	4.37781e-23	TRUE
ENSG00000180376.17	CCDC66	5.24212	4.69029e-28	4.89984e-27	TRUE	5.42008	2.99955e-19	2.3052e-18	TRUE
ENSG00000163946.14	TASOR	7.04882	1.37693e-56	7.98776e-55	TRUE	6.77124	1.16039e-54	1.15073e-52	TRUE
ENSG00000157500.12	APPL1	7.45699	4.43079e-60	3.42231e-58	TRUE	8.21716	1.34499e-48	7.78295e-47	TRUE
ENSG00000174840.9	PDE12	7.17972	1.66723e-41	3.61605e-40	TRUE	7.50972	2.14759e-39	5.82437e-38	TRUE
ENSG00000168374.11	ARF4	6.26451	1.40372e-43	3.41067e-42	TRUE	6.78151	1.96845e-33	3.4364e-32	TRUE
ENSG00000174839.13	DENND6A	8.08911	2.5295e-44	6.4318e-43	TRUE	8.08811	1.45524e-36	3.19844e-35	TRUE
ENSG00000163681.16	SLMAP	5.94233	7.21807e-43	1.67634e-41	TRUE	5.92495	3.01696e-34	5.56211e-33	TRUE
ENSG00000136068.16	FLNB	3.02292	7.78062e-15	4.55097e-14	TRUE	2.90945	9.50306e-11	4.68698e-10	TRUE
ENSG00000163684.12	RPP14	7.36878	4.86918e-41	1.02465e-39	TRUE	6.70804	5.61695e-31	8.31936e-30	TRUE
ENSG00000255154.9	HTD2	7.38003	1.53581e-28	1.63993e-27	TRUE	6.57228	3.30545e-22	2.9874e-21	TRUE
ENSG00000168297.16	PXK	5.67838	5.54731e-31	6.74125e-30	TRUE	5.13021	1.42823e-18	1.06091e-17	TRUE
ENSG00000168301.13	KCTD6	6.56594	3.57307e-29	3.92358e-28	TRUE	8.04187	2.80974e-19	2.1637e-18	TRUE
ENSG00000144724.20	PTPRG	4.35505	1.00097e-18	6.96296e-18	TRUE	4.85489	1.57032e-19	1.22638e-18	TRUE
ENSG00000163635.20	ATXN7	6.11595	1.98394e-50	7.6619e-49	TRUE	6.282	9.88109e-44	3.80544e-42	TRUE
ENSG00000151276.24	MAGI1	4.18601	1.55689e-18	1.07535e-17	TRUE	4.82044	6.02725e-20	4.8149e-19	TRUE
ENSG00000163376.11	KBTBD8	6.7268	9.53612e-33	1.26492e-31	TRUE	7.89525	3.87402e-30	5.46791e-29	TRUE
ENSG00000144747.17	TMF1	6.12407	1.02578e-31	1.2957e-30	TRUE	6.14852	1.69365e-32	2.77134e-31	TRUE
ENSG00000144746.7	ARL6IP5	6.76714	1.17716e-33	1.63883e-32	TRUE	6.69944	7.05188e-26	7.8633e-25	TRUE
ENSG00000114861.24	FOXP1	4.7586	3.14345e-34	4.5237e-33	TRUE	4.61154	1.21897e-22	1.13251e-21	TRUE
ENSG00000285708.1	ENSG00000285708	7.18916	2.19418e-30	2.58227e-29	TRUE	6.63044	7.97896e-22	7.04551e-21	TRUE
ENSG00000163412.13	EIF4E3	5.26682	3.30803e-32	4.27324e-31	TRUE	5.79604	2.79054e-28	3.54772e-27	TRUE
ENSG00000163602.12	RYBP	8.1043	1.85108e-71	3.34451e-69	TRUE	7.40801	1.61917e-47	8.47994e-46	TRUE
ENSG00000144736.14	SHQ1	5.66262	3.22616e-34	4.63784e-33	TRUE	5.39432	2.06919e-22	1.89716e-21	TRUE
ENSG00000163605.15	PPP4R2	7.71489	1.99789e-71	3.54725e-69	TRUE	8.40088	1.17175e-51	8.65502e-50	TRUE
ENSG00000227124.11	ZNF717	5.07749	1.10785e-20	8.38948e-20	TRUE	6.09368	5.05705e-22	4.52501e-21	TRUE
ENSG00000169855.21	ROBO1	6.10697	1.30373e-48	4.44853e-47	TRUE	5.51528	5.68247e-35	1.09856e-33	TRUE
ENSG00000083937.10	CHMP2B	6.75487	5.85994e-37	9.80577e-36	TRUE	6.8647	2.52471e-33	4.37842e-32	TRUE
ENSG00000163320.12	CGGBP1	8.62205	4.73203e-65	5.18929e-63	TRUE	7.89328	4.53315e-56	5.08293e-54	TRUE
ENSG00000175105.8	ZNF654	6.4406	4.24212e-39	7.97371e-38	TRUE	6.12431	1.62876e-29	2.21392e-28	TRUE
ENSG00000179021.10	C3orf38	8.00122	5.35169e-47	1.60449e-45	TRUE	8.19327	2.01609e-43	7.51889e-42	TRUE
ENSG00000169379.17	ARL13B	5.98363	3.21156e-33	4.37604e-32	TRUE	7.38125	1.08856e-22	1.01465e-21	TRUE
ENSG00000178694.10	NSUN3	6.77662	1.75795e-31	2.2002e-30	TRUE	6.14097	2.585e-26	2.94485e-25	TRUE
ENSG00000080200.10	CRYBG3	6.21484	4.6793e-38	8.34421e-37	TRUE	5.94983	1.99676e-30	2.86679e-29	TRUE
ENSG00000170854.18	RIOX2	5.22729	4.25503e-31	5.20787e-30	TRUE	5.65544	8.09095e-26	9.00431e-25	TRUE
ENSG00000080822.17	CLDND1	6.85466	2.05806e-50	7.93321e-49	TRUE	7.61609	1.46088e-29	1.99284e-28	TRUE
ENSG00000057019.16	DCBLD2	6.73778	1.98681e-45	5.42886e-44	TRUE	6.31927	1.62781e-21	1.41222e-20	TRUE
ENSG00000036054.13	TBC1D23	8.22792	2.53972e-28	2.68533e-27	TRUE	6.23808	2.81166e-26	3.20093e-25	TRUE
ENSG00000154174.8	TOMM70	7.53383	3.40329e-50	1.29124e-48	TRUE	6.6836	1.92578e-43	7.20568e-42	TRUE
ENSG00000114354.15	TFG	5.83244	1.30235e-41	2.84575e-40	TRUE	5.95851	7.47815e-34	1.34391e-32	TRUE
ENSG00000081154.12	PCNP	7.61581	7.62732e-59	5.18784e-57	TRUE	7.22472	4.54238e-52	3.49876e-50	TRUE
ENSG00000066422.6	ZBTB11	7.79157	1.50614e-35	2.32316e-34	TRUE	6.05855	2.16679e-25	2.34946e-24	TRUE
ENSG00000114391.13	RPL24	4.38309	1.7849e-31	2.23325e-30	TRUE	5.39246	5.87707e-35	1.13554e-33	TRUE
ENSG00000182504.11	CEP97	6.90692	2.07114e-46	5.99899e-45	TRUE	6.3902	2.36519e-30	3.37593e-29	TRUE
ENSG00000144815.17	NXPE3	4.4547	1.14086e-25	1.06586e-24	FALSE	5.5628	8.44422e-25	8.84483e-24	TRUE
ENSG00000170017.12	ALCAM	5.84263	1.24875e-27	1.27976e-26	TRUE	7.24055	2.97396e-23	2.87225e-22	TRUE
ENSG00000114439.19	BBX	6.65358	3.46714e-62	3.10483e-60	TRUE	6.96049	2.78576e-57	3.62245e-55	TRUE
ENSG00000196776.17	CD47	5.12461	1.03774e-24	9.24852e-24	TRUE	5.92182	3.3927e-21	2.892e-20	TRUE
ENSG00000163507.15	CIP2A	7.26226	7.85243e-33	1.04974e-31	TRUE	6.53159	4.01217e-30	5.65823e-29	TRUE
ENSG00000198919.13	DZIP3	5.87778	6.69804e-30	7.66072e-29	TRUE	5.6685	2.62567e-23	2.54018e-22	TRUE
ENSG00000177707.11	NECTIN3	5.73805	1.57602e-30	1.87034e-29	TRUE	5.28029	1.57067e-22	1.45059e-21	TRUE
ENSG00000144827.9	ABHD10	7.82179	7.91014e-25	7.09128e-24	TRUE	8.19438	1.59877e-17	1.12157e-16	FALSE
ENSG00000144848.11	ATG3	6.879	1.29169e-29	1.45462e-28	TRUE	6.44408	5.75042e-26	6.44148e-25	TRUE
ENSG00000138459.9	SLC35A5	7.6856	5.39715e-33	7.26958e-32	TRUE	7.12053	8.81157e-25	9.21832e-24	TRUE
ENSG00000163608.15	NEPRO	7.25538	1.05757e-47	3.34686e-46	TRUE	7.53985	3.0105e-43	1.11184e-41	TRUE
ENSG00000176542.10	USF3	6.75175	6.08699e-64	6.3203e-62	TRUE	6.83048	8.1578e-55	8.2786e-53	TRUE
ENSG00000121579.14	NAA50	8.42116	2.195e-82	1.15418e-79	TRUE	9.19889	3.08605e-80	4.05922e-77	TRUE
ENSG00000114573.10	ATP6V1A	7.87192	1.35137e-60	1.07622e-58	TRUE	8.06697	2.43329e-45	1.06687e-43	TRUE
ENSG00000151576.10	QTRT2	5.50667	6.75725e-37	1.12614e-35	TRUE	6.40432	9.36489e-34	1.66981e-32	TRUE
ENSG00000082701.17	GSK3B	5.99332	6.90321e-54	3.37862e-52	TRUE	6.05618	3.44531e-35	6.80683e-34	TRUE
ENSG00000163428.4	LRRC58	9.20347	5.68794e-69	8.67232e-67	TRUE	9.00634	5.73878e-63	1.22663e-60	TRUE
ENSG00000163430.12	FSTL1	5.96415	1.46028e-33	2.02133e-32	TRUE	6.41769	4.34152e-28	5.44466e-27	TRUE
ENSG00000144840.10	RABL3	6.40697	4.29596e-26	4.09564e-25	TRUE	4.71193	4.74999e-15	2.93169e-14	FALSE
ENSG00000051341.15	POLQ	5.53093	1.64581e-37	2.84576e-36	TRUE	5.94706	1.38944e-33	2.44715e-32	TRUE
ENSG00000173230.17	GOLGB1	4.19138	7.08038e-20	5.17453e-19	TRUE	4.10055	7.03198e-17	4.75552e-16	TRUE
ENSG00000173226.17	IQCB1	7.14087	1.62435e-23	1.37789e-22	FALSE	6.1038	5.0311e-21	4.25151e-20	TRUE
ENSG00000272758.7	WDR5B-DT	6.83642	8.0778e-34	1.13733e-32	TRUE	7.76095	2.96163e-05	0.000104117	TRUE
ENSG00000114030.13	KPNA1	8.50624	3.47237e-42	7.79506e-41	TRUE	7.05919	5.67037e-41	1.72989e-39	TRUE
ENSG00000206527.10	HACD2	8.03028	1.40264e-49	5.08198e-48	TRUE	8.11526	1.2169e-06	4.70993e-06	TRUE
ENSG00000175455.16	CCDC14	5.86685	4.28264e-30	4.95901e-29	TRUE	7.13507	1.42938e-27	1.74584e-26	TRUE
ENSG00000114491.14	UMPS	6.3608	1.08047e-31	1.3631e-30	TRUE	5.53894	1.02873e-23	1.01798e-22	TRUE
ENSG00000173706.14	HEG1	5.86451	8.01117e-33	1.06887e-31	TRUE	4.97555	1.54212e-16	1.02745e-15	TRUE
ENSG00000163848.20	ZNF148	7.01385	8.57588e-61	6.92384e-59	TRUE	7.96988	1.74231e-47	9.0831e-46	TRUE
ENSG00000114520.11	SNX4	6.56519	3.74984e-29	4.1144e-28	TRUE	6.49292	2.82293e-21	2.41777e-20	TRUE
ENSG00000144909.8	OSBPL11	7.64605	1.39691e-39	2.70761e-38	TRUE	7.16344	1.12623e-32	1.86519e-31	TRUE
ENSG00000058262.10	SEC61A1	7.64896	6.78072e-46	1.90352e-44	TRUE	7.2165	1.54494e-35	3.15247e-34	TRUE
ENSG00000163902.12	RPN1	6.33975	4.37823e-35	6.58001e-34	TRUE	5.78491	2.48565e-33	4.31506e-32	TRUE
ENSG00000075785.14	RAB7A	7.00636	9.51205e-60	7.08035e-58	TRUE	6.78116	4.32972e-36	9.21419e-35	TRUE
ENSG00000169714.17	CNBP	7.22418	1.055e-74	2.45851e-72	TRUE	7.91188	1.17411e-61	2.19305e-59	TRUE
ENSG00000172765.18	TMCC1	6.06386	1.19459e-37	2.08047e-36	TRUE	6.61166	5.34118e-27	6.31615e-26	TRUE
ENSG00000017260.20	ATP2C1	5.69106	2.17006e-29	2.40419e-28	TRUE	5.23239	4.43003e-23	4.22601e-22	TRUE
ENSG00000114686.9	MRPL3	7.77984	2.82594e-46	8.12216e-45	TRUE	7.0271	2.61069e-39	7.03015e-38	TRUE
ENSG00000138246.17	DNAJC13	6.15583	1.80941e-42	4.12283e-41	TRUE	5.72217	3.60562e-33	6.20265e-32	TRUE
ENSG00000081307.15	UBA5	6.07805	5.22342e-26	4.95681e-25	TRUE	6.15278	2.80267e-22	2.54578e-21	TRUE
ENSG00000091527.17	CDV3	7.9819	3.72767e-81	1.68007e-78	TRUE	9.68811	4.09844e-72	2.19004e-69	TRUE
ENSG00000163781.14	TOPBP1	7.75748	9.30035e-68	1.28432e-65	TRUE	7.1819	1.41535e-55	1.52693e-53	TRUE
ENSG00000144867.13	SRPRB	5.10933	3.83941e-22	3.07738e-21	FALSE	5.96536	2.21124e-23	2.14958e-22	TRUE
ENSG00000163785.13	RYK	6.20027	3.32668e-44	8.39633e-43	TRUE	6.14085	1.09411e-34	2.07414e-33	TRUE
ENSG00000129055.13	ANAPC13	7.39088	1.46999e-35	2.26826e-34	TRUE	7.10984	9.63203e-31	1.40532e-29	TRUE
ENSG00000174579.4	MSL2	7.51755	3.82779e-57	2.33273e-55	TRUE	7.34587	5.67814e-43	2.04192e-41	TRUE
ENSG00000114054.14	PCCB	4.20887	1.37796e-20	1.03966e-19	FALSE	5.40518	1.00231e-18	7.50068e-18	TRUE
ENSG00000118007.13	STAG1	5.81816	1.63886e-38	3.00207e-37	TRUE	5.80357	3.03409e-33	5.23262e-32	TRUE
ENSG00000114098.18	ARMC8	5.57058	3.08357e-33	4.20724e-32	TRUE	6.79871	5.04422e-25	5.35073e-24	TRUE
ENSG00000051382.9	PIK3CB	5.65208	1.53501e-32	2.01463e-31	TRUE	5.39023	8.20298e-23	7.70485e-22	TRUE
ENSG00000175110.14	MRPS22	4.38952	1.67488e-23	1.41958e-22	TRUE	4.48841	2.58674e-20	2.10378e-19	TRUE
ENSG00000184432.11	COPB2	5.10246	1.07769e-32	1.42627e-31	TRUE	5.31258	5.75359e-26	6.44293e-25	TRUE
ENSG00000114120.14	SLC25A36	7.82614	4.21923e-66	5.04512e-64	TRUE	8.64912	7.01427e-48	3.77171e-46	TRUE
ENSG00000155893.13	PXYLP1	4.2494	7.62355e-18	5.09322e-17	TRUE	4.82062	2.96655e-16	1.94504e-15	TRUE
ENSG00000177311.12	ZBTB38	5.20126	1.61566e-35	2.48728e-34	TRUE	5.59358	2.16255e-24	2.2123e-23	TRUE
ENSG00000155903.14	RASA2	7.73589	8.76945e-33	1.16662e-31	TRUE	6.16583	7.437e-29	9.77095e-28	TRUE
ENSG00000069849.11	ATP1B3	8.59329	1.58729e-30	1.88317e-29	TRUE	7.15672	2.73621e-32	4.42229e-31	TRUE
ENSG00000114126.18	TFDP2	5.66305	7.98032e-33	1.06545e-31	TRUE	6.33563	2.49931e-28	3.18457e-27	TRUE
ENSG00000175066.16	GK5	5.04261	5.94724e-27	5.92182e-26	TRUE	6.00213	4.30492e-28	5.40073e-27	TRUE
ENSG00000114127.11	XRN1	6.17234	2.72062e-48	9.02778e-47	TRUE	6.53199	9.32268e-37	2.08656e-35	TRUE
ENSG00000175054.16	ATR	5.31699	3.21865e-25	2.94205e-24	TRUE	4.69442	1.96352e-19	1.5258e-18	TRUE
ENSG00000120756.13	PLS1	6.13326	8.43219e-33	1.12321e-31	TRUE	6.25264	1.34057e-24	1.38675e-23	TRUE
ENSG00000163714.18	U2SURP	7.02381	1.50895e-58	9.94988e-57	TRUE	6.65669	3.18668e-52	2.48816e-50	TRUE
ENSG00000181744.9	DIPK2A	6.56914	6.76616e-37	1.12716e-35	TRUE	6.63432	1.271e-24	1.31718e-23	TRUE
ENSG00000152952.12	PLOD2	6.83131	4.67211e-33	6.31998e-32	TRUE	7.49636	2.38655e-23	2.31342e-22	TRUE
ENSG00000163754.18	GYG1	6.27751	3.67265e-34	5.26862e-33	TRUE	7.57454	4.17902e-36	8.91012e-35	TRUE
ENSG00000071794.16	HLTF	6.97312	1.19373e-37	2.07985e-36	TRUE	6.8131	5.33654e-36	1.12449e-34	TRUE
ENSG00000018408.15	WWTR1	5.82997	1.375e-27	1.40669e-26	TRUE	4.82365	7.51258e-18	5.36933e-17	FALSE
ENSG00000114744.9	COMMD2	7.40561	3.08803e-36	4.94156e-35	TRUE	7.19893	1.33548e-32	2.19788e-31	TRUE
ENSG00000082996.20	RNF13	6.78677	2.27059e-26	2.1912e-25	TRUE	6.01143	2.13371e-20	1.74155e-19	TRUE
ENSG00000070087.15	PFN2	8.42252	6.62639e-50	2.4595e-48	TRUE	8.44682	1.96324e-43	7.3298e-42	TRUE
ENSG00000196428.13	TSC22D2	6.76021	8.85053e-54	4.29073e-52	TRUE	6.79196	1.4913e-35	3.04847e-34	TRUE
ENSG00000120742.11	SERP1	7.30697	1.4455e-56	8.36191e-55	TRUE	7.34431	1.13476e-46	5.54395e-45	TRUE
ENSG00000144895.12	EIF2A	7.61072	6.4199e-50	2.38502e-48	TRUE	6.9878	3.99815e-46	1.86793e-44	TRUE
ENSG00000198843.14	SELENOT	7.26887	4.9667e-44	1.23682e-42	TRUE	10.3296	1.70488e-19	1.32844e-18	TRUE
ENSG00000181788.4	SIAH2	8.69054	1.72226e-25	1.59704e-24	TRUE	8.52401	1.18856e-20	9.84443e-20	TRUE
ENSG00000144893.13	MED12L	5.74335	4.71118e-37	7.9353e-36	TRUE	5.48639	5.54893e-23	5.26694e-22	TRUE
ENSG00000152601.18	MBNL1	7.92227	1.79311e-55	9.74076e-54	TRUE	8.34026	5.88955e-45	2.5083e-43	TRUE
ENSG00000169860.7	P2RY1	8.00646	1.51692e-22	1.24008e-21	TRUE	8.51705	2.1384e-18	1.5717e-17	TRUE
ENSG00000181467.5	RAP2B	6.93399	3.9447e-40	7.85379e-39	TRUE	7.94646	1.64959e-30	2.37534e-29	TRUE
ENSG00000114790.13	ARHGEF26	7.02906	1.99293e-32	2.59898e-31	TRUE	6.68879	8.35076e-26	9.27835e-25	TRUE
ENSG00000174953.14	DHX36	7.21563	5.315e-44	1.32195e-42	TRUE	6.0112	3.71152e-38	9.16463e-37	TRUE
ENSG00000163655.16	GMPS	6.61861	4.1135e-47	1.24235e-45	TRUE	7.03399	2.88613e-49	1.73772e-47	TRUE
ENSG00000114850.7	SSR3	8.05805	1.55275e-62	1.42791e-60	TRUE	8.35984	9.44041e-51	6.39312e-49	TRUE
ENSG00000163659.13	TIPARP	7.83643	1.15017e-61	9.88955e-60	TRUE	8.11018	1.25605e-51	9.23777e-50	TRUE
ENSG00000163660.12	CCNL1	7.09462	4.83497e-46	1.37304e-44	TRUE	5.75293	2.61691e-32	4.23748e-31	TRUE
ENSG00000174891.14	RSRC1	5.46543	1.70546e-26	1.65832e-25	TRUE	4.43316	1.20901e-13	6.92232e-13	FALSE
ENSG00000168827.15	GFM1	5.52516	3.34617e-31	4.11761e-30	TRUE	6.26698	7.51754e-27	8.81964e-26	TRUE
ENSG00000113810.16	SMC4	7.00439	1.20118e-71	2.21916e-69	TRUE	6.61256	4.87841e-59	7.65307e-57	TRUE
ENSG00000213186.8	TRIM59	7.10814	2.75673e-52	1.20538e-50	TRUE	7.50095	2.02436e-43	7.5415e-42	TRUE
ENSG00000186432.10	KPNA4	6.02893	7.99017e-46	2.23387e-44	TRUE	6.58228	7.24075e-38	1.75497e-36	TRUE
ENSG00000163590.14	PPM1L	5.14964	6.14615e-28	6.38658e-27	TRUE	5.57929	1.03212e-15	6.59271e-15	TRUE
ENSG00000169251.13	NMD3	7.633	1.23583e-44	3.19184e-43	TRUE	7.47053	6.23034e-46	2.84474e-44	TRUE
ENSG00000173905.9	GOLIM4	5.18047	2.58241e-24	2.26556e-23	FALSE	5.57633	6.03829e-23	5.72349e-22	TRUE
ENSG00000085276.19	MECOM	5.05803	3.87865e-28	4.06332e-27	TRUE	4.98174	7.65395e-15	4.67007e-14	TRUE
ENSG00000085274.16	MYNN	6.91001	1.13352e-26	1.11407e-25	TRUE	7.83566	1.17565e-18	8.7729e-18	FALSE
ENSG00000008952.17	SEC62	6.96271	2.08212e-53	9.80436e-52	TRUE	6.62121	6.16767e-49	3.6556e-47	TRUE
ENSG00000173889.16	PHC3	6.32151	3.63292e-57	2.21727e-55	TRUE	7.29413	2.38908e-45	1.05289e-43	TRUE
ENSG00000163558.13	PRKCI	6.89487	1.15132e-30	1.37468e-29	TRUE	6.9601	1.56306e-36	3.4288e-35	TRUE
ENSG00000136603.14	SKIL	8.88719	5.82777e-49	2.04116e-47	TRUE	8.33369	1.58717e-45	7.05847e-44	TRUE
ENSG00000163577.8	EIF5A2	6.99415	3.57948e-28	3.75374e-27	TRUE	6.40173	1.96936e-21	1.70162e-20	TRUE
ENSG00000154310.17	TNIK	6.42735	4.67942e-32	6.00883e-31	TRUE	6.21234	2.57207e-33	4.45378e-32	TRUE
ENSG00000075420.13	FNDC3B	6.06182	2.76806e-46	7.96138e-45	TRUE	5.89994	7.48112e-32	1.17361e-30	TRUE
ENSG00000114346.14	ECT2	6.01182	4.89578e-44	1.22138e-42	TRUE	6.6599	3.49631e-41	1.08405e-39	TRUE
ENSG00000177565.18	TBL1XR1	7.60149	1.52243e-70	2.49763e-68	TRUE	6.99807	5.35398e-57	6.61013e-55	TRUE
ENSG00000172667.11	ZMAT3	6.77644	4.87636e-44	1.21876e-42	TRUE	6.15168	3.74233e-30	5.29078e-29	TRUE
ENSG00000121879.6	PIK3CA	5.82921	4.79099e-23	3.99467e-22	TRUE	5.63643	9.09827e-15	5.53159e-14	FALSE
ENSG00000121864.10	ZNF639	8.82008	2.4523e-27	2.48097e-26	TRUE	7.86119	4.0635e-33	6.97279e-32	TRUE
ENSG00000171109.19	MFN1	5.80608	5.62779e-26	5.33068e-25	TRUE	6.98708	9.04987e-25	9.45894e-24	TRUE
ENSG00000114450.11	GNB4	7.60058	1.97158e-33	2.71898e-32	TRUE	7.97176	6.55491e-34	1.18421e-32	TRUE
ENSG00000058056.10	USP13	5.60118	2.52305e-30	2.95912e-29	TRUE	6.4347	4.36438e-25	4.64542e-24	TRUE
ENSG00000114416.18	FXR1	6.67015	9.07944e-53	4.06977e-51	TRUE	6.76173	6.82282e-44	2.65756e-42	TRUE
ENSG00000058063.16	ATP11B	7.46514	6.15922e-39	1.15034e-37	TRUE	9.01045	2.93299e-26	3.33684e-25	TRUE
ENSG00000043093.15	DCUN1D1	7.28245	1.42605e-46	4.17474e-45	TRUE	7.19826	6.74791e-38	1.63784e-36	TRUE
ENSG00000176597.12	B3GNT5	5.89794	7.57715e-27	7.51013e-26	TRUE	6.65595	1.46831e-22	1.35863e-21	TRUE
ENSG00000114796.16	KLHL24	6.80008	2.23944e-32	2.91675e-31	TRUE	6.82173	1.29241e-26	1.49827e-25	TRUE
ENSG00000163872.16	YEATS2	5.3772	5.34429e-32	6.8369e-31	TRUE	5.57256	4.16506e-26	4.69947e-25	TRUE
ENSG00000161202.20	DVL3	5.8357	1.31858e-36	2.14945e-35	TRUE	5.83273	8.22762e-24	8.18669e-23	TRUE
ENSG00000161203.14	AP2M1	4.59994	1.40502e-25	1.30729e-24	FALSE	4.98891	1.69569e-21	1.46812e-20	TRUE
ENSG00000114867.22	EIF4G1	5.97898	5.79838e-58	3.69277e-56	TRUE	5.60264	1.65814e-35	3.3774e-34	TRUE
ENSG00000073803.14	MAP3K13	4.87717	1.98351e-29	2.20166e-28	TRUE	4.39941	2.53111e-13	1.42817e-12	FALSE
ENSG00000163904.13	SENP2	6.92911	4.66724e-44	1.16792e-42	TRUE	7.32874	1.92758e-39	5.24851e-38	TRUE
ENSG00000073792.16	IGF2BP2	6.50685	3.72468e-48	1.22114e-46	TRUE	6.04716	1.96688e-31	3.00964e-30	TRUE
ENSG00000136527.19	TRA2B	7.25519	9.47441e-71	1.57961e-68	TRUE	6.55021	1.64323e-54	1.5965e-52	TRUE
ENSG00000156976.17	EIF4A2	7.09585	9.01862e-45	2.35899e-43	TRUE	6.63173	1.48097e-39	4.07134e-38	TRUE
ENSG00000145012.14	LPP	5.67646	2.45606e-35	3.74054e-34	TRUE	5.17082	1.1501e-17	8.13828e-17	TRUE
ENSG00000152492.15	CCDC50	7.41783	4.31755e-41	9.10904e-40	TRUE	6.8612	9.0735e-35	1.72968e-33	TRUE
ENSG00000198836.11	OPA1	7.45557	3.94891e-42	8.85515e-41	TRUE	6.48126	2.38268e-34	4.41654e-33	TRUE
ENSG00000133657.17	ATP13A3	6.86681	3.85852e-62	3.43283e-60	TRUE	6.51407	1.07719e-48	6.29723e-47	TRUE
ENSG00000041802.11	LSG1	5.23419	7.22657e-22	5.72514e-21	FALSE	6.19727	6.8201e-22	6.04877e-21	TRUE
ENSG00000114331.16	ACAP2	7.4128	3.5823e-37	6.06624e-36	TRUE	6.63004	9.18533e-34	1.63951e-32	TRUE
ENSG00000184203.8	PPP1R2	9.93721	1.94692e-19	1.39648e-18	TRUE	9.11846	9.46981e-22	8.32112e-21	TRUE
ENSG00000072274.13	TFRC	6.85199	5.72126e-34	8.13069e-33	TRUE	7.61962	1.21311e-36	2.687e-35	TRUE
ENSG00000161217.12	PCYT1A	5.59023	3.9614e-28	4.14578e-27	TRUE	6.62062	4.07352e-31	6.09941e-30	TRUE
ENSG00000163960.12	UBXN7	7.74941	3.57735e-55	1.89562e-53	TRUE	7.12015	1.35359e-48	7.80633e-47	TRUE
ENSG00000163961.4	RNF168	7.1554	4.04696e-43	9.56119e-42	TRUE	7.72482	5.64505e-34	1.02471e-32	TRUE
ENSG00000174013.8	FBXO45	7.40013	4.54502e-52	1.96221e-50	TRUE	8.02074	2.64884e-35	5.30683e-34	TRUE
ENSG00000180370.10	PAK2	7.64287	3.89342e-54	1.93792e-52	TRUE	7.8991	1.05409e-44	4.39086e-43	TRUE
ENSG00000119231.11	SENP5	7.1865	1.06801e-44	2.77236e-43	TRUE	6.88435	2.09101e-28	2.67529e-27	TRUE
ENSG00000114503.11	NCBP2	7.63351	6.80909e-36	1.06836e-34	TRUE	6.97083	2.79763e-34	5.16331e-33	TRUE
ENSG00000075711.21	DLG1	5.6749	6.49229e-37	1.0833e-35	TRUE	5.71237	2.31307e-32	3.7526e-31	TRUE
ENSG00000122068.13	FYTTD1	6.60599	1.8879e-45	5.17582e-44	TRUE	7.34328	7.44009e-35	1.42705e-33	TRUE
ENSG00000186001.14	LRCH3	6.33142	1.14924e-33	1.6016e-32	TRUE	6.05264	1.5903e-26	1.83243e-25	TRUE
ENSG00000182899.17	RPL35A	4.69355	2.59178e-31	3.21049e-30	TRUE	5.1122	5.13797e-30	7.21616e-29	TRUE
ENSG00000182903.16	ZNF721	8.05375	2.09224e-47	6.47632e-46	TRUE	8.65417	1.01344e-38	2.602e-37	TRUE
ENSG00000185619.18	PCGF3	6.89958	4.59535e-44	1.15063e-42	TRUE	6.53051	2.74503e-31	4.16492e-30	TRUE
ENSG00000249592.7	ENSG00000249592	5.90959	4.96949e-32	6.36734e-31	TRUE	6.47035	3.3295e-21	2.83958e-20	TRUE
ENSG00000127418.15	FGFRL1	7.91379	1.7211e-29	1.9208e-28	TRUE	5.6602	3.63923e-18	2.64355e-17	TRUE
ENSG00000159692.16	CTBP1	6.25275	8.74152e-39	1.62008e-37	TRUE	6.79958	1.14951e-30	1.66788e-29	TRUE
ENSG00000163950.13	SLBP	7.0805	1.05855e-35	1.64515e-34	TRUE	7.95643	9.73207e-43	3.44185e-41	TRUE
ENSG00000168924.15	LETM1	5.02518	1.09855e-33	1.53251e-32	TRUE	5.29466	1.38708e-25	1.52285e-24	TRUE
ENSG00000109685.19	NSD2	5.94563	9.03711e-62	7.86938e-60	TRUE	6.54902	9.09004e-53	7.49085e-51	TRUE
ENSG00000063978.16	RNF4	7.90345	8.63295e-64	8.87398e-62	TRUE	6.94211	1.72981e-48	9.84321e-47	TRUE
ENSG00000125386.16	FAM193A	5.69159	1.45292e-39	2.81085e-38	TRUE	5.41581	1.31671e-25	1.44792e-24	TRUE
ENSG00000087274.19	ADD1	5.87875	1.37434e-42	3.15606e-41	TRUE	5.68018	9.89461e-33	1.65066e-31	TRUE
ENSG00000087269.16	NOP14	4.87656	2.77998e-27	2.80557e-26	TRUE	4.18196	5.76685e-19	4.35846e-18	TRUE
ENSG00000197386.14	HTT	4.57985	2.5725e-32	3.34416e-31	TRUE	4.61583	5.14889e-22	4.60358e-21	TRUE
ENSG00000074211.14	PPP2R2C	5.31442	1.20641e-25	1.1253e-24	TRUE	5.09468	4.76676e-16	3.08981e-15	TRUE
ENSG00000179010.16	MRFAP1	7.04845	3.58409e-60	2.77879e-58	TRUE	7.40974	2.59916e-58	3.71919e-56	TRUE
ENSG00000178988.11	MRFAP1L1	7.70165	9.90102e-23	8.14605e-22	TRUE	6.9998	1.84448e-25	2.01017e-24	TRUE
ENSG00000170871.12	KIAA0232	8.40764	1.30629e-42	3.00315e-41	TRUE	6.83138	6.21106e-39	1.62643e-37	TRUE
ENSG00000132405.19	TBC1D14	6.53832	1.50318e-46	4.39426e-45	TRUE	6.67493	5.9255e-37	1.34381e-35	TRUE
ENSG00000245748.1	ENSG00000245748	6.16174	2.27877e-06	8.83379e-06	FALSE	5.88513	3.79175e-18	2.75083e-17	TRUE
ENSG00000173011.12	TADA2B	5.3539	1.02644e-34	1.51541e-33	TRUE	6.93973	8.55083e-25	8.95377e-24	TRUE
ENSG00000109519.13	GRPEL1	7.39907	5.54751e-29	6.048e-28	TRUE	6.29502	4.86165e-28	6.07688e-27	TRUE
ENSG00000071127.17	WDR1	4.4644	2.80571e-24	2.45726e-23	TRUE	5.71984	5.8967e-24	5.91036e-23	TRUE
ENSG00000178163.8	ZNF518B	7.44457	5.03214e-48	1.63282e-46	TRUE	8.03762	1.41653e-46	6.85203e-45	TRUE
ENSG00000038219.13	BOD1L1	5.34064	3.98486e-38	7.13378e-37	TRUE	5.35617	8.90689e-32	1.389e-30	TRUE
ENSG00000118564.15	FBXL5	6.29837	3.85883e-36	6.14865e-35	TRUE	6.78553	9.87004e-29	1.28491e-27	TRUE
ENSG00000169762.17	TAPT1	5.30613	8.31049e-28	8.57044e-27	TRUE	5.7051	5.4424e-22	4.86219e-21	TRUE
ENSG00000118579.13	MED28	6.17051	4.42148e-37	7.45346e-36	TRUE	7.1198	5.15616e-40	1.46215e-38	TRUE
ENSG00000163257.11	DCAF16	7.91402	9.39851e-57	5.59464e-55	TRUE	7.81213	1.69518e-41	5.3729e-40	TRUE
ENSG00000109805.10	NCAPG	7.04905	4.5435e-43	1.07096e-41	TRUE	6.73947	1.3352e-40	3.96031e-39	TRUE
ENSG00000178177.17	LCORL	5.54305	3.751e-35	5.66226e-34	TRUE	6.29195	1.253e-28	1.6207e-27	TRUE
ENSG00000145147.20	SLIT2	6.76697	1.22616e-54	6.30195e-53	TRUE	6.65944	1.9271e-39	5.24851e-38	TRUE
ENSG00000109606.13	DHX15	7.02512	8.91003e-50	3.28334e-48	TRUE	7.66347	3.2258e-44	1.28727e-42	TRUE
ENSG00000168214.22	RBPJ	6.77624	1.28739e-56	7.51083e-55	TRUE	6.32999	6.78896e-33	1.14372e-31	TRUE
ENSG00000109787.13	KLF3	8.27998	2.83111e-08	1.22252e-07	TRUE	9.616	4.72281e-29	6.27731e-28	TRUE
ENSG00000109790.18	KLHL5	6.28183	2.51402e-27	2.54154e-26	TRUE	6.62371	8.16487e-22	7.20595e-21	FALSE
ENSG00000035928.17	RFC1	7.82505	1.59185e-59	1.15146e-57	TRUE	6.52789	2.55665e-47	1.3089e-45	TRUE
ENSG00000163682.17	RPL9	6.09467	8.57748e-42	1.88834e-40	TRUE	5.76053	1.62073e-48	9.23791e-47	TRUE
ENSG00000078140.14	UBE2K	8.583	8.77132e-52	3.70491e-50	TRUE	8.2513	8.17106e-53	6.76615e-51	TRUE
ENSG00000121892.15	PDS5A	6.98243	1.73956e-51	7.23592e-50	TRUE	7.48261	1.51455e-52	1.23619e-50	TRUE
ENSG00000078177.14	N4BP2	6.85636	5.67777e-36	8.95302e-35	TRUE	7.02064	9.63526e-29	1.2553e-27	TRUE
ENSG00000163697.17	APBB2	5.03254	3.15902e-25	2.88883e-24	TRUE	5.77395	1.98799e-23	1.93862e-22	TRUE
ENSG00000109133.13	TMEM33	8.34689	4.55737e-56	2.55001e-54	TRUE	8.98225	7.49971e-51	5.17879e-49	TRUE
ENSG00000014824.14	SLC30A9	6.96165	7.90627e-57	4.74075e-55	TRUE	6.36296	5.72246e-44	2.23916e-42	TRUE
ENSG00000188848.17	BEND4	7.16265	2.73583e-59	1.93128e-57	TRUE	7.46208	1.63675e-47	8.55437e-46	TRUE
ENSG00000151806.14	GUF1	8.05729	2.43092e-26	2.34262e-25	TRUE	7.09658	9.03932e-28	1.1128e-26	TRUE
ENSG00000163281.12	GNPDA2	8.57042	3.67581e-20	2.72376e-19	TRUE	7.35078	7.35641e-20	5.84505e-19	TRUE
ENSG00000109171.15	SLAIN2	9.42116	2.59511e-24	2.27573e-23	TRUE	7.56464	7.54194e-31	1.11075e-29	TRUE
ENSG00000075539.15	FRYL	5.85443	3.23855e-33	4.40989e-32	TRUE	5.02791	3.22317e-24	3.27089e-23	TRUE
ENSG00000109184.15	DCUN1D4	7.00726	3.40758e-11	1.69631e-10	TRUE	6.7202	3.99269e-41	1.23236e-39	TRUE
ENSG00000163069.13	SGCB	6.05194	2.63497e-34	3.81336e-33	TRUE	6.68723	1.05101e-29	1.44418e-28	TRUE
ENSG00000109189.13	USP46	6.36329	2.52899e-42	5.72427e-41	TRUE	7.29825	4.20486e-43	1.53635e-41	TRUE
ENSG00000226950.8	DANCR	5.39599	7.67094e-26	7.22591e-25	TRUE	5.92476	1.09253e-18	8.15798e-18	TRUE
ENSG00000134852.15	CLOCK	6.96625	1.35559e-58	8.99644e-57	TRUE	7.35097	1.34066e-46	6.52196e-45	TRUE
ENSG00000109265.15	CRACD	4.50986	3.42307e-24	2.98393e-23	TRUE	4.1361	1.04509e-14	6.33032e-14	FALSE
ENSG00000128059.8	PPAT	8.65387	2.41904e-44	6.1624e-43	TRUE	8.48154	1.37667e-34	2.58543e-33	TRUE
ENSG00000128050.9	PAICS	8.6774	2.49114e-94	3.19286e-91	TRUE	7.48045	9.61851e-70	4.01151e-67	TRUE
ENSG00000174780.17	SRP72	8.10536	6.88001e-47	2.04773e-45	TRUE	7.19983	9.38199e-59	1.42602e-56	TRUE
ENSG00000084093.19	REST	6.81947	2.36349e-47	7.26114e-46	TRUE	6.92169	9.44569e-47	4.64128e-45	TRUE
ENSG00000047315.17	POLR2B	4.83166	9.51032e-24	8.13465e-23	TRUE	5.06074	2.90701e-26	3.30838e-25	TRUE
ENSG00000145241.11	CENPC	5.36716	3.27159e-28	3.43966e-27	TRUE	5.61342	1.27968e-21	1.11642e-20	TRUE
ENSG00000033178.13	UBA6	7.69273	1.02456e-44	2.66463e-43	TRUE	7.24894	2.56233e-44	1.02731e-42	TRUE
ENSG00000083896.13	YTHDC1	6.10244	3.49469e-41	7.41497e-40	TRUE	6.56139	6.2392e-41	1.8933e-39	TRUE
ENSG00000132463.15	GRSF1	6.18971	8.03597e-45	2.11003e-43	TRUE	5.95902	1.12568e-29	1.54421e-28	TRUE
ENSG00000173542.9	MOB1B	7.73106	1.4209e-46	4.16263e-45	TRUE	9.05521	4.81247e-37	1.10015e-35	TRUE
ENSG00000156136.10	DCK	7.39661	1.29134e-24	1.14465e-23	TRUE	6.92571	2.09377e-22	1.91867e-21	TRUE
ENSG00000132466.20	ANKRD17	7.56702	3.60034e-80	1.50678e-77	TRUE	7.59331	1.70788e-69	6.79161e-67	TRUE
ENSG00000163743.14	RCHY1	6.51677	7.55633e-37	1.2537e-35	TRUE	6.83656	2.91618e-33	5.03688e-32	TRUE
ENSG00000174796.12	THAP6	5.55108	8.66785e-31	1.04192e-29	TRUE	5.37605	1.51161e-21	1.31307e-20	TRUE
ENSG00000138757.15	G3BP2	7.59315	2.5856e-77	7.52097e-75	TRUE	7.03977	1.1336e-65	3.02876e-63	TRUE
ENSG00000138768.15	USO1	6.80318	4.21449e-31	5.16288e-30	TRUE	6.53391	1.06768e-37	2.55877e-36	TRUE
ENSG00000198301.12	SDAD1	7.68013	5.31508e-46	1.5034e-44	TRUE	7.15088	6.81279e-40	1.91133e-38	TRUE
ENSG00000138750.16	NUP54	7.35803	3.0599e-41	6.51264e-40	TRUE	6.56102	5.19779e-37	1.18348e-35	TRUE
ENSG00000138760.11	SCARB2	4.60814	3.22838e-27	3.2469e-26	TRUE	4.4488	1.57774e-18	1.16942e-17	TRUE
ENSG00000138758.12	SEPTIN11	7.14754	9.84725e-65	1.05726e-62	TRUE	6.96926	1.81377e-41	5.73116e-40	TRUE
ENSG00000118816.11	CCNI	7.34038	1.18291e-74	2.74102e-72	TRUE	7.74082	3.32114e-65	8.4133e-63	TRUE
ENSG00000138764.15	CCNG2	5.80164	1.49469e-28	1.59644e-27	TRUE	5.74978	6.56792e-29	8.65907e-28	TRUE
ENSG00000138767.14	CNOT6L	7.16125	3.13094e-56	1.77611e-54	TRUE	8.50009	1.20144e-46	5.86136e-45	TRUE
ENSG00000138756.19	BMP2K	5.93524	3.81378e-32	4.91573e-31	TRUE	5.54891	1.07914e-23	1.06663e-22	TRUE
ENSG00000163291.14	PAQR3	7.82162	6.96909e-44	1.7198e-42	TRUE	7.61742	4.66664e-39	1.23144e-37	TRUE
ENSG00000138670.19	RASGEF1B	5.69117	4.39706e-30	5.09006e-29	TRUE	5.07888	1.36523e-15	8.65259e-15	FALSE
ENSG00000138668.19	HNRNPD	6.06978	3.36273e-47	1.02314e-45	TRUE	5.18838	2.56942e-32	4.16256e-31	TRUE
ENSG00000152795.18	HNRNPDL	7.39293	4.20824e-65	4.62726e-63	TRUE	7.17941	5.37499e-54	4.96809e-52	TRUE
ENSG00000145293.17	ENOPH1	7.33201	7.86964e-31	9.48195e-30	TRUE	6.60528	6.29633e-27	7.40723e-26	TRUE
ENSG00000138674.17	SEC31A	6.68809	2.13945e-56	1.22552e-54	TRUE	6.73995	2.3601e-42	8.04717e-41	TRUE
ENSG00000251022.6	THAP9-AS1	7.48853	5.95369e-48	1.91367e-46	TRUE	7.41707	1.21894e-28	1.57844e-27	TRUE
ENSG00000189308.11	LIN54	7.47363	1.50745e-49	5.43768e-48	TRUE	7.85867	1.04922e-35	2.16681e-34	TRUE
ENSG00000163624.6	CDS1	7.03965	1.93548e-29	2.14894e-28	TRUE	7.48936	3.12822e-24	3.17643e-23	TRUE
ENSG00000163625.16	WDFY3	5.56949	2.90596e-48	9.61169e-47	TRUE	6.06981	8.77524e-36	1.82102e-34	TRUE
ENSG00000163629.13	PTPN13	6.03071	7.2525e-42	1.60526e-40	TRUE	5.37456	9.11614e-30	1.25711e-28	TRUE
ENSG00000172493.23	AFF1	6.59397	4.33901e-55	2.28741e-53	TRUE	7.35569	7.79555e-41	2.3489e-39	TRUE
ENSG00000145332.14	KLHL8	6.8155	1.03666e-45	2.87864e-44	TRUE	7.18259	5.56339e-43	2.00487e-41	TRUE
ENSG00000163644.15	PPM1K	5.96824	4.06719e-31	4.9869e-30	TRUE	5.98352	1.85786e-25	2.02347e-24	TRUE
ENSG00000138640.15	FAM13A	5.12524	2.54182e-30	2.98028e-29	TRUE	4.93354	2.37648e-22	2.1696e-21	TRUE
ENSG00000185477.5	GPRIN3	6.17537	1.64128e-31	2.0548e-30	TRUE	5.91813	1.85716e-25	2.02336e-24	TRUE
ENSG00000163104.18	SMARCAD1	7.20609	2.1485e-44	5.48684e-43	TRUE	6.55465	1.0675e-42	3.75205e-41	TRUE
ENSG00000163110.15	PDLIM5	6.35453	5.02786e-46	1.42412e-44	TRUE	5.83249	1.63546e-27	1.99469e-26	TRUE
ENSG00000138698.15	RAP1GDS1	6.33305	1.32429e-26	1.29659e-25	TRUE	6.5915	2.66129e-22	2.42315e-21	FALSE
ENSG00000151247.13	EIF4E	8.40466	1.15367e-49	4.19845e-48	TRUE	7.35459	1.44761e-38	3.67808e-37	TRUE
ENSG00000164024.12	METAP1	6.6931	1.08659e-42	2.50789e-41	TRUE	7.31707	1.74092e-35	3.5397e-34	TRUE
ENSG00000197894.12	ADH5	6.15988	4.49689e-21	3.46293e-20	FALSE	6.69348	1.16208e-21	1.01642e-20	TRUE
ENSG00000109270.13	LAMTOR3	11.7769	5.64283e-15	3.3214e-14	TRUE	6.87151	4.1861e-22	3.76342e-21	TRUE
ENSG00000164031.17	DNAJB14	6.19088	2.73461e-37	4.66351e-36	TRUE	5.93486	1.23418e-32	2.04001e-31	TRUE
ENSG00000164032.12	H2AZ1	7.57586	3.94921e-32	5.08549e-31	TRUE	6.39286	1.05903e-37	2.53982e-36	TRUE
ENSG00000138814.17	PPP3CA	5.50439	6.67881e-36	1.04872e-34	TRUE	7.5134	3.84442e-32	6.14945e-31	TRUE
ENSG00000138821.14	SLC39A8	5.5295	3.71864e-26	3.55682e-25	TRUE	5.40108	3.59781e-23	3.45623e-22	TRUE
ENSG00000109332.20	UBE2D3	6.84338	1.8536e-77	5.46931e-75	TRUE	7.65903	1.2796e-65	3.36624e-63	TRUE
ENSG00000145354.12	CISD2	5.93775	8.28472e-28	8.54601e-27	TRUE	6.81079	1.09998e-21	9.64322e-21	TRUE
ENSG00000138778.14	CENPE	5.78477	3.26087e-30	3.79947e-29	TRUE	6.01226	4.29075e-34	7.84283e-33	TRUE
ENSG00000168769.14	TET2	7.20868	5.0489e-55	2.65481e-53	TRUE	7.08447	7.56512e-40	2.11372e-38	TRUE
ENSG00000138780.15	GSTCD	8.48794	2.72138e-20	2.02788e-19	TRUE	5.60297	3.32955e-21	2.83958e-20	TRUE
ENSG00000164022.18	AIMP1	5.82928	1.73782e-28	1.84986e-27	TRUE	4.97579	4.56155e-21	3.85949e-20	TRUE
ENSG00000164023.15	SGMS2	6.37096	1.39144e-36	2.26373e-35	TRUE	6.98555	3.17416e-28	4.01751e-27	TRUE
ENSG00000138795.10	LEF1	6.25127	1.11235e-38	2.05226e-37	TRUE	5.22866	1.449e-20	1.19265e-19	TRUE
ENSG00000109475.17	RPL34	4.33525	1.22423e-22	1.00441e-21	TRUE	4.68754	5.04923e-18	3.63994e-17	TRUE
ENSG00000198856.13	OSTC	6.2908	1.2296e-25	1.14667e-24	FALSE	7.07534	1.01775e-18	7.60953e-18	TRUE
ENSG00000138802.11	SEC24B	7.12675	1.45909e-65	1.6577e-63	TRUE	7.53211	9.62698e-38	2.31691e-36	TRUE
ENSG00000123739.11	PLA2G12A	7.59578	4.40727e-35	6.62123e-34	TRUE	7.42194	2.87551e-28	3.65032e-27	TRUE
ENSG00000170522.10	ELOVL6	7.34259	6.90379e-42	1.53055e-40	TRUE	6.50123	5.03191e-33	8.5615e-32	TRUE
ENSG00000174749.6	FAM241A	5.73603	3.33087e-27	3.34834e-26	TRUE	6.30837	1.55756e-22	1.43926e-21	TRUE
ENSG00000138660.12	AP1AR	5.59713	1.76467e-29	1.96675e-28	TRUE	6.20726	1.87813e-27	2.27929e-26	TRUE
ENSG00000145365.11	TIFA	5.79064	2.77771e-27	2.80396e-26	TRUE	6.21067	1.38725e-18	1.03203e-17	TRUE
ENSG00000138658.16	ZGRF1	5.32704	7.06854e-22	5.60211e-21	FALSE	5.60859	3.35864e-25	3.59731e-24	TRUE
ENSG00000145349.18	CAMK2D	5.47742	3.32334e-28	3.49317e-27	TRUE	5.61727	3.32827e-19	2.54696e-18	TRUE
ENSG00000174607.11	UGT8	7.44632	1.38249e-24	1.22386e-23	TRUE	9.62564	5.00847e-11	2.50709e-10	FALSE
ENSG00000260404.4	ENSG00000260404	6.99441	8.11776e-49	2.81439e-47	TRUE	5.97841	5.61541e-23	5.32856e-22	TRUE
ENSG00000145388.15	METTL14	5.99807	2.17335e-34	3.15197e-33	TRUE	7.10447	3.81581e-30	5.38798e-29	TRUE
ENSG00000145390.12	USP53	6.42415	4.3597e-48	1.42364e-46	TRUE	6.60531	7.89912e-39	2.04343e-37	TRUE
ENSG00000283050.3	GTF2IP12	8.31705	1.86691e-40	3.79998e-39	TRUE	6.95076	2.34992e-30	3.35693e-29	TRUE
ENSG00000164109.14	MAD2L1	8.94605	2.70479e-27	2.7317e-26	TRUE	7.34352	6.96557e-38	1.68947e-36	TRUE
ENSG00000164111.15	ANXA5	6.36985	7.69975e-41	1.60141e-39	TRUE	7.18011	7.58805e-25	7.97246e-24	TRUE
ENSG00000123737.13	EXOSC9	6.27904	7.71348e-28	7.97682e-27	TRUE	6.28415	2.55706e-26	2.91496e-25	TRUE
ENSG00000145386.11	CCNA2	8.09089	1.45809e-50	5.70086e-49	TRUE	7.60502	2.83045e-36	6.11487e-35	TRUE
ENSG00000138688.17	KIAA1109	5.21884	6.73139e-42	1.49314e-40	TRUE	4.8592	8.77511e-26	9.73718e-25	TRUE
ENSG00000138685.17	FGF2	7.76286	2.72365e-31	3.3657e-30	TRUE	6.65358	7.98316e-31	1.17148e-29	TRUE
ENSG00000145375.9	SPATA5	6.07435	7.14638e-34	1.01104e-32	TRUE	5.40844	1.09022e-24	1.13464e-23	TRUE
ENSG00000164056.11	SPRY1	6.37438	3.66161e-31	4.49633e-30	TRUE	5.33991	2.99597e-14	1.76898e-13	FALSE
ENSG00000151458.12	ANKRD50	6.12557	9.76385e-44	2.3922e-42	TRUE	6.3782	2.11368e-32	3.43564e-31	TRUE
ENSG00000164066.13	INTU	6.22912	2.79328e-40	5.61862e-39	TRUE	5.99343	3.31531e-27	3.97129e-26	TRUE
ENSG00000164070.12	HSPA4L	6.35446	7.37415e-37	1.22447e-35	TRUE	6.04281	6.79654e-39	1.76891e-37	TRUE
ENSG00000142731.11	PLK4	7.91403	4.17598e-43	9.85464e-42	TRUE	7.38875	4.04321e-37	9.28635e-36	TRUE
ENSG00000138709.19	LARP1B	6.26369	1.83222e-29	2.03815e-28	TRUE	5.47063	8.30505e-23	7.79858e-22	TRUE
ENSG00000164040.18	PGRMC2	6.83923	1.55021e-31	1.94316e-30	TRUE	6.28011	1.53346e-25	1.68032e-24	TRUE
ENSG00000077684.16	JADE1	6.47383	1.60156e-47	4.99895e-46	TRUE	7.01821	2.54718e-42	8.64198e-41	TRUE
ENSG00000151466.12	SCLT1	6.01287	2.32674e-29	2.57357e-28	TRUE	5.23768	1.98252e-19	1.53986e-18	FALSE
ENSG00000254535.4	PABPC4L	7.15774	5.0312e-27	5.02067e-26	TRUE	5.89974	6.75006e-22	5.99287e-21	TRUE
ENSG00000151012.13	SLC7A11	6.70194	3.25412e-30	3.79269e-29	TRUE	6.8373	7.19025e-30	9.99997e-29	TRUE
ENSG00000109381.21	ELF2	5.73109	2.05545e-43	4.93009e-42	TRUE	6.39367	4.49123e-32	7.14398e-31	TRUE
ENSG00000164134.13	NAA15	7.27506	3.17415e-67	4.17259e-65	TRUE	6.95106	9.70708e-52	7.24831e-50	TRUE
ENSG00000145391.14	SETD7	6.76003	1.09977e-62	1.02049e-60	TRUE	7.1075	6.1524e-59	9.5639e-57	TRUE
ENSG00000153130.18	SCOC	7.27354	1.08974e-33	1.52075e-32	TRUE	8.19557	6.45203e-33	1.09018e-31	TRUE
ENSG00000179387.10	ELMOD2	7.05435	1.54676e-31	1.93943e-30	TRUE	8.31347	6.95153e-25	7.32395e-24	TRUE
ENSG00000109436.8	TBC1D9	5.01952	4.04315e-27	4.04848e-26	TRUE	5.97176	2.83126e-25	3.05349e-24	TRUE
ENSG00000170153.11	RNF150	6.05857	1.66214e-29	1.85802e-28	TRUE	6.47865	8.24759e-30	1.14379e-28	TRUE
ENSG00000170185.11	USP38	7.26053	7.28929e-49	2.54004e-47	TRUE	6.96896	5.65141e-37	1.28335e-35	TRUE
ENSG00000109458.9	GAB1	7.01949	2.56629e-42	5.8055e-41	TRUE	5.64261	7.02092e-25	7.39251e-24	TRUE
ENSG00000153147.6	SMARCA5	6.62045	1.86221e-41	4.0177e-40	TRUE	6.30486	2.34078e-39	6.32826e-38	TRUE
ENSG00000164163.11	ABCE1	7.94478	6.05503e-71	1.03046e-68	TRUE	7.82914	5.71918e-58	7.95082e-56	TRUE
ENSG00000164164.17	OTUD4	7.9044	8.24298e-70	1.3003e-67	TRUE	7.65656	4.35032e-58	6.0974e-56	TRUE
ENSG00000151612.18	ZNF827	4.47786	1.05887e-25	9.91061e-25	TRUE	3.87576	1.29621e-12	7.07113e-12	TRUE
ENSG00000120519.16	SLC10A7	4.82072	3.04725e-25	2.79035e-24	TRUE	5.15333	2.96091e-15	1.8468e-14	FALSE
ENSG00000164168.8	TMEM184C	8.06021	7.56901e-44	1.86672e-42	TRUE	8.85619	8.99333e-29	1.17301e-27	TRUE
ENSG00000198589.14	LRBA	4.49067	2.66173e-24	2.33215e-23	TRUE	4.33426	1.69862e-19	1.32386e-18	TRUE
ENSG00000145425.10	RPS3A	6.59934	6.04599e-49	2.11218e-47	TRUE	5.78128	2.72872e-53	2.36252e-51	TRUE
ENSG00000109686.19	SH3D19	6.78366	1.46576e-60	1.16056e-58	TRUE	6.07712	5.98787e-51	4.17066e-49	TRUE
ENSG00000164142.16	FHIP1A	5.41055	3.04431e-34	4.38411e-33	TRUE	5.24961	6.76197e-23	6.38466e-22	TRUE
ENSG00000109670.16	FBXW7	5.82356	2.39601e-35	3.65316e-34	TRUE	6.42907	8.78309e-28	1.0836e-26	TRUE
ENSG00000164144.16	ARFIP1	7.00253	1.83941e-31	2.30005e-30	TRUE	6.74342	6.66695e-29	8.77948e-28	TRUE
ENSG00000109654.16	TRIM2	5.96824	4.6342e-45	1.23742e-43	TRUE	5.82537	1.23922e-28	1.60349e-27	TRUE
ENSG00000171566.12	PLRG1	6.28388	5.84549e-31	7.09311e-30	TRUE	6.76443	5.74698e-27	6.77551e-26	TRUE
ENSG00000164114.19	MAP9	6.21881	7.85748e-24	6.74904e-23	TRUE	6.18846	4.81829e-28	6.02488e-27	TRUE
ENSG00000205208.5	C4orf46	8.01804	1.4137e-44	3.63521e-43	TRUE	9.31204	8.89298e-26	9.85519e-25	TRUE
ENSG00000052795.13	FNIP2	6.47399	1.25043e-47	3.94502e-46	TRUE	7.11066	3.88679e-39	1.03604e-37	TRUE
ENSG00000109756.10	RAPGEF2	5.68459	1.04434e-38	1.93114e-37	TRUE	6.05529	2.08431e-34	3.87399e-33	TRUE
ENSG00000170088.14	TMEM192	4.86751	1.59745e-32	2.09523e-31	TRUE	5.66819	1.39151e-28	1.7985e-27	TRUE
ENSG00000052802.13	MSMO1	7.4995	1.36415e-31	1.71571e-30	TRUE	7.21691	9.57811e-27	1.1172e-25	TRUE
ENSG00000129116.19	PALLD	5.90291	1.21075e-43	2.95055e-42	TRUE	5.89213	1.64167e-20	1.34636e-19	TRUE
ENSG00000154447.15	SH3RF1	5.35035	4.1824e-26	3.99202e-25	TRUE	5.11506	3.96257e-21	3.36602e-20	TRUE
ENSG00000137601.18	NEK1	5.01021	2.93866e-27	2.96424e-26	TRUE	4.58098	3.47782e-20	2.80978e-19	TRUE
ENSG00000109572.15	CLCN3	7.92911	6.27842e-39	1.171e-37	TRUE	7.64235	1.23077e-40	3.66011e-39	TRUE
ENSG00000198948.12	MFAP3L	5.33483	2.49282e-28	2.63846e-27	TRUE	5.53781	1.05128e-17	7.4529e-17	TRUE
ENSG00000109586.12	GALNT7	5.59396	2.4418e-31	3.03019e-30	TRUE	5.62121	2.34602e-20	1.91073e-19	TRUE
ENSG00000164118.13	CEP44	6.0083	1.16737e-23	9.9519e-23	FALSE	6.40195	1.2409e-18	9.24364e-18	TRUE
ENSG00000129128.13	SPCS3	8.41808	9.57017e-60	7.11071e-58	TRUE	8.0871	7.05326e-45	2.98164e-43	TRUE
ENSG00000151718.16	WWC2	6.4529	1.61788e-35	2.48896e-34	TRUE	5.45709	2.11324e-23	2.05665e-22	TRUE
ENSG00000168564.6	CDKN2AIP	6.23042	8.22443e-29	8.87442e-28	TRUE	7.69984	1.56969e-22	1.45007e-21	TRUE
ENSG00000173320.12	STOX2	6.44637	1.15472e-38	2.12758e-37	TRUE	7.56111	6.81917e-29	8.96612e-28	TRUE
ENSG00000164305.19	CASP3	9.12336	5.79165e-23	4.8114e-22	TRUE	8.44632	1.39848e-22	1.29682e-21	TRUE
ENSG00000151725.12	CENPU	6.55525	1.23681e-30	1.47461e-29	TRUE	6.35186	7.53561e-27	8.83478e-26	TRUE
ENSG00000164323.15	CFAP97	7.78323	2.76983e-38	4.99789e-37	TRUE	6.73966	7.97236e-35	1.52402e-33	TRUE
ENSG00000083857.15	FAT1	6.14289	8.33015e-46	2.32647e-44	TRUE	6.6201	4.8784e-34	8.88847e-33	TRUE
ENSG00000071539.14	TRIP13	7.23611	1.21588e-43	2.96128e-42	TRUE	7.20126	1.83706e-32	2.99454e-31	TRUE
ENSG00000049656.14	CLPTM1L	5.52894	8.26175e-35	1.2246e-33	TRUE	6.18118	1.00653e-28	1.30983e-27	TRUE
ENSG00000153395.10	LPCAT1	6.62515	3.95461e-36	6.29149e-35	TRUE	6.20339	2.5476e-33	4.41365e-32	TRUE
ENSG00000164151.12	ICE1	6.52912	1.1316e-48	3.87732e-47	TRUE	7.73968	2.46318e-48	1.37196e-46	TRUE
ENSG00000037474.15	NSUN2	5.93102	2.52088e-35	3.835e-34	TRUE	5.47943	6.16797e-26	6.89567e-25	TRUE
ENSG00000112941.14	TENT4A	7.42249	9.7734e-41	2.02345e-39	TRUE	7.81231	2.91394e-35	5.8209e-34	TRUE
ENSG00000124275.15	MTRR	7.5155	5.8226e-46	1.64016e-44	TRUE	6.73793	9.25849e-34	1.6517e-32	TRUE
ENSG00000150753.12	CCT5	5.98432	3.9788e-44	9.99306e-43	TRUE	5.40802	5.99505e-32	9.47872e-31	TRUE
ENSG00000145495.16	MARCHF6	5.89907	4.88004e-44	1.21894e-42	TRUE	7.09476	1.56372e-39	4.29195e-38	TRUE
ENSG00000112977.16	DAP	6.19005	4.19872e-27	4.20118e-26	TRUE	6.97431	1.25665e-27	1.53926e-26	TRUE
ENSG00000038382.21	TRIO	4.14351	9.31668e-26	8.74403e-25	TRUE	4.46179	3.52731e-21	3.003e-20	TRUE
ENSG00000154124.5	OTULIN	5.88453	1.90582e-37	3.27874e-36	TRUE	6.2238	9.44864e-31	1.38151e-29	TRUE
ENSG00000154122.14	ANKH	5.3466	1.09986e-39	2.14399e-38	TRUE	5.21334	1.13853e-21	9.96583e-21	TRUE
ENSG00000145555.15	MYO10	3.88783	1.61916e-18	1.11742e-17	FALSE	4.12606	4.58201e-16	2.97174e-15	TRUE
ENSG00000113360.17	DROSHA	5.5564	4.90087e-34	6.98417e-33	TRUE	4.74275	2.61947e-24	2.66935e-23	TRUE
ENSG00000082213.18	C5orf22	7.68361	4.08837e-43	9.65345e-42	TRUE	7.77871	7.60758e-35	1.45836e-33	TRUE
ENSG00000113384.14	GOLPH3	9.29129	7.79732e-45	2.05e-43	TRUE	7.48012	5.77665e-43	2.07516e-41	TRUE
ENSG00000150712.11	MTMR12	6.24591	4.16179e-36	6.61083e-35	TRUE	6.90117	1.44979e-37	3.45275e-36	TRUE
ENSG00000056097.16	ZFR	7.84208	1.39558e-65	1.59438e-63	TRUE	8.24378	5.53683e-67	1.6757e-64	TRUE
ENSG00000113387.12	SUB1	6.02066	1.5583e-36	2.52618e-35	TRUE	5.48286	5.66254e-30	7.93336e-29	TRUE
ENSG00000113407.14	TARS1	6.49325	1.16612e-44	3.0232e-43	TRUE	7.23719	2.12351e-52	1.70075e-50	TRUE
ENSG00000039560.14	RAI14	6.70023	3.63398e-51	1.48598e-49	TRUE	5.82016	3.06886e-38	7.62178e-37	TRUE
ENSG00000113456.19	RAD1	7.11367	8.56019e-37	1.41568e-35	TRUE	6.37444	3.62689e-31	5.4496e-30	TRUE
ENSG00000113460.13	BRIX1	5.28553	3.89592e-25	3.54689e-24	TRUE	6.49956	1.24061e-23	1.2227e-22	TRUE
ENSG00000168724.17	DNAJC21	5.69051	8.4825e-35	1.25641e-33	TRUE	5.92301	1.75783e-28	2.25575e-27	TRUE
ENSG00000164187.7	LMBRD2	6.63287	1.17271e-26	1.15094e-25	TRUE	6.02702	1.4689e-21	1.27662e-20	FALSE
ENSG00000145604.17	SKP2	6.83701	3.75299e-62	3.3462e-60	TRUE	6.75365	6.14513e-46	2.81712e-44	TRUE
ENSG00000164190.19	NIPBL	7.15531	7.53774e-58	4.77088e-56	TRUE	7.00657	7.51098e-51	5.17879e-49	TRUE
ENSG00000197603.16	CPLANE1	5.2695	1.05094e-35	1.63394e-34	TRUE	4.15053	1.12776e-14	6.81661e-14	TRUE
ENSG00000113569.16	NUP155	7.56881	1.33355e-68	1.96742e-66	TRUE	7.73789	1.01921e-59	1.65194e-57	TRUE
ENSG00000113594.10	LIFR	5.33312	1.3249e-24	1.17415e-23	TRUE	6.25649	1.27704e-32	2.10779e-31	TRUE
ENSG00000164327.13	RICTOR	6.5985	4.39469e-51	1.79169e-49	TRUE	7.39526	1.88097e-37	4.45171e-36	TRUE
ENSG00000132356.12	PRKAA1	6.64145	3.76928e-40	7.51913e-39	TRUE	7.30587	4.28733e-36	9.12967e-35	TRUE
ENSG00000145592.14	RPL37	5.66513	7.77489e-53	3.51189e-51	TRUE	5.43699	9.08441e-47	4.47018e-45	TRUE
ENSG00000205765.10	C5orf51	8.72458	8.63733e-74	1.86448e-71	TRUE	8.33688	1.98436e-63	4.3502e-61	TRUE
ENSG00000172262.12	ZNF131	5.11179	3.14115e-37	5.33463e-36	TRUE	5.36489	1.88045e-26	2.15877e-25	TRUE
ENSG00000112972.15	HMGCS1	5.30768	1.38259e-28	1.47901e-27	TRUE	6.08178	7.22163e-28	8.94503e-27	TRUE
ENSG00000172239.14	PAIP1	5.72822	5.68415e-32	7.26034e-31	TRUE	6.98252	3.93467e-29	5.25017e-28	TRUE
ENSG00000112992.18	NNT	6.09699	1.86055e-29	2.06854e-28	TRUE	5.60596	3.03025e-16	1.98566e-15	TRUE
ENSG00000112996.11	MRPS30	6.88748	6.55969e-43	1.53124e-41	TRUE	8.0224	6.44832e-30	8.99739e-29	TRUE
ENSG00000170571.12	EMB	6.89614	8.67847e-40	1.6998e-38	TRUE	7.19902	3.47274e-29	4.65377e-28	TRUE
ENSG00000164172.20	MOCS2	6.22786	3.00418e-27	3.0281e-26	TRUE	6.22245	2.46205e-25	2.66455e-24	TRUE
ENSG00000185305.12	ARL15	9.21832	2.86961e-17	1.87441e-16	TRUE	7.50524	1.075e-23	1.06285e-22	TRUE
ENSG00000178996.14	SNX18	6.30184	3.10444e-34	4.46913e-33	TRUE	6.66545	6.68201e-29	8.79592e-28	TRUE
ENSG00000164294.14	GPX8	7.39696	1.76015e-28	1.87266e-27	TRUE	8.01609	6.06954e-21	5.10758e-20	TRUE
ENSG00000067248.11	DHX29	6.20405	3.61806e-36	5.76948e-35	TRUE	6.28209	1.22613e-24	1.27145e-23	TRUE
ENSG00000039123.16	MTREX	5.41196	6.10954e-33	8.20756e-32	TRUE	5.41891	1.2692e-31	1.96137e-30	TRUE
ENSG00000134352.20	IL6ST	8.57507	8.45589e-54	4.11399e-52	TRUE	7.87365	7.88002e-50	4.99053e-48	TRUE
ENSG00000095015.6	MAP3K1	7.263	6.96791e-43	1.62284e-41	TRUE	6.98378	6.93382e-37	1.56832e-35	TRUE
ENSG00000155545.20	MIER3	8.13013	1.58354e-43	3.83623e-42	TRUE	7.06266	2.60465e-43	9.66124e-42	TRUE
ENSG00000062194.16	GPBP1	7.08976	6.09404e-53	2.77712e-51	TRUE	7.60581	1.5249e-51	1.1167e-49	TRUE
ENSG00000113448.20	PDE4D	5.57002	2.75645e-34	3.98635e-33	TRUE	4.6309	6.22162e-17	4.22337e-16	TRUE
ENSG00000164181.14	ELOVL7	5.44952	9.9204e-27	9.7783e-26	TRUE	8.41888	2.16461e-17	1.50646e-16	TRUE
ENSG00000049167.16	ERCC8	4.47081	1.13909e-24	1.01342e-23	TRUE	4.04594	8.02724e-16	5.1486e-15	TRUE
ENSG00000188725.8	SMIM15	8.38861	1.14019e-39	2.2205e-38	TRUE	7.5198	2.09105e-36	4.54909e-35	TRUE
ENSG00000130449.6	ZSWIM6	7.883	7.65149e-42	1.69174e-40	TRUE	6.68575	5.104e-31	7.58591e-30	TRUE
ENSG00000068796.19	KIF2A	6.36522	1.34516e-52	5.97728e-51	TRUE	6.96369	2.10194e-47	1.08916e-45	TRUE
ENSG00000086189.11	DIMT1	5.94228	1.2563e-25	1.17078e-24	TRUE	6.13846	5.1275e-25	5.43569e-24	TRUE
ENSG00000086200.17	IPO11	6.19073	4.25399e-33	5.76389e-32	TRUE	5.79031	3.91254e-29	5.22676e-28	TRUE
ENSG00000153006.16	SREK1IP1	7.16533	5.01663e-53	2.30664e-51	TRUE	7.45964	1.05199e-47	5.59517e-46	TRUE
ENSG00000153015.17	CWC27	3.36652	4.7193e-18	3.18613e-17	TRUE	3.39309	1.20353e-12	6.57184e-12	TRUE
ENSG00000197860.10	SGTB	7.09399	1.16714e-35	1.8098e-34	TRUE	7.2028	8.17666e-31	1.19911e-29	TRUE
ENSG00000123213.23	NLN	5.6731	1.37599e-30	1.63627e-29	TRUE	5.7313	5.44787e-29	7.21021e-28	TRUE
ENSG00000112851.15	ERBIN	7.37343	6.44423e-51	2.5963e-49	TRUE	7.70008	1.58296e-48	9.03766e-47	TRUE
ENSG00000153914.16	SREK1	5.49824	2.81933e-44	7.1466e-43	TRUE	5.50326	1.07881e-35	2.22656e-34	TRUE
ENSG00000145675.15	PIK3R1	5.79425	1.64463e-40	3.35586e-39	TRUE	6.5041	6.58311e-32	1.03606e-30	TRUE
ENSG00000145740.20	SLC30A5	6.40688	4.7549e-32	6.10192e-31	TRUE	7.62063	3.33396e-27	3.99223e-26	TRUE
ENSG00000273841.6	TAF9	6.39417	4.52759e-33	6.12853e-32	TRUE	5.14305	7.74174e-21	6.47968e-20	TRUE
ENSG00000152942.19	RAD17	8.32706	1.73042e-27	1.76415e-26	TRUE	7.60476	3.92823e-28	4.94266e-27	TRUE
ENSG00000197822.12	OCLN	5.65361	6.11585e-29	6.65523e-28	TRUE	6.11152	5.53087e-18	3.9796e-17	TRUE
ENSG00000145736.14	GTF2H2	7.30565	3.06579e-23	2.57612e-22	TRUE	6.18526	2.29314e-19	1.77508e-18	FALSE
ENSG00000145734.20	BDP1	6.44507	6.13656e-58	3.90209e-56	TRUE	6.35564	2.99869e-54	2.84078e-52	TRUE
ENSG00000131844.17	MCCC2	5.97368	1.65164e-46	4.8111e-45	TRUE	4.94711	2.3881e-28	3.04513e-27	TRUE
ENSG00000131711.15	MAP1B	6.52639	1.29831e-64	1.39031e-62	TRUE	6.80796	5.395e-49	3.21996e-47	TRUE
ENSG00000113048.18	MRPS27	5.64022	1.28287e-42	2.95097e-41	TRUE	5.44533	8.26305e-36	1.721e-34	TRUE
ENSG00000049883.15	PTCD2	5.5366	4.20298e-34	6.00631e-33	TRUE	4.82576	1.44559e-20	1.19012e-19	TRUE
ENSG00000083312.19	TNPO1	7.97944	4.82553e-78	1.53422e-75	TRUE	7.25591	1.69178e-57	2.24253e-55	TRUE
ENSG00000157107.14	FCHO2	6.68215	4.44767e-29	4.86445e-28	TRUE	6.58479	1.38602e-24	1.43247e-23	TRUE
ENSG00000145741.17	BTF3	5.99455	1.55087e-51	6.47075e-50	TRUE	5.7611	8.08824e-37	1.81741e-35	TRUE
ENSG00000164338.10	UTP15	7.02445	2.5404e-34	3.6804e-33	TRUE	7.43359	3.50533e-30	4.96598e-29	TRUE
ENSG00000164346.10	NSA2	6.40238	1.75398e-45	4.82481e-44	TRUE	6.35371	7.402e-34	1.33162e-32	TRUE
ENSG00000198780.13	FAM169A	6.4079	1.38765e-46	4.07105e-45	TRUE	7.31055	1.80679e-38	4.5703e-37	TRUE
ENSG00000113161.17	HMGCR	5.50433	5.89626e-28	6.13469e-27	TRUE	5.97889	3.44885e-31	5.19591e-30	TRUE
ENSG00000113163.19	CERT1	5.83098	3.53321e-31	4.33996e-30	TRUE	6.17672	3.94829e-35	7.7602e-34	TRUE
ENSG00000164252.13	AGGF1	6.89204	1.43641e-36	2.33226e-35	TRUE	9.53453	2.2484e-17	1.56255e-16	TRUE
ENSG00000132846.6	ZBED3	6.97128	3.04342e-44	7.70512e-43	TRUE	6.8413	7.04418e-24	7.03985e-23	TRUE
ENSG00000164253.14	WDR41	5.94943	1.51914e-29	1.70096e-28	TRUE	6.30533	1.20253e-27	1.47508e-26	TRUE
ENSG00000132842.15	AP3B1	4.59138	2.87134e-26	2.75667e-25	TRUE	4.8695	1.25926e-17	8.88497e-17	TRUE
ENSG00000085365.18	SCAMP1	7.06394	6.24708e-46	1.75612e-44	TRUE	7.37993	1.88269e-39	5.13856e-38	TRUE
ENSG00000145685.14	LHFPL2	6.70499	8.5523e-32	1.08194e-30	TRUE	6.18797	1.17451e-27	1.44123e-26	TRUE
ENSG00000152409.9	JMY	7.71994	1.75947e-41	3.80405e-40	TRUE	7.64213	1.88654e-40	5.54276e-39	TRUE
ENSG00000152413.15	HOMER1	6.81437	1.70527e-38	3.12092e-37	TRUE	6.709	8.95867e-28	1.10367e-26	TRUE
ENSG00000164329.14	TENT2	5.51418	2.30396e-31	2.86608e-30	TRUE	5.79015	8.23025e-29	1.07594e-27	TRUE
ENSG00000177034.17	MTX3	8.92948	3.05892e-38	5.50981e-37	TRUE	8.18864	2.67669e-45	1.1676e-43	TRUE
ENSG00000039319.17	ZFYVE16	6.44678	1.64729e-34	2.40349e-33	TRUE	6.21205	5.23934e-28	6.53942e-27	TRUE
ENSG00000228716.7	DHFR	7.5698	3.61191e-66	4.4089e-64	TRUE	8.30638	2.42193e-64	5.63454e-62	TRUE
ENSG00000113318.11	MSH3	5.23276	2.77388e-25	2.54571e-24	FALSE	6.29747	2.52413e-22	2.30194e-21	TRUE
ENSG00000152348.16	ATG10	4.67601	1.72837e-26	1.6798e-25	TRUE	5.16439	1.60534e-29	2.18381e-28	TRUE
ENSG00000186468.13	RPS23	5.35391	2.19106e-35	3.34767e-34	TRUE	6.00951	3.62922e-43	1.33171e-41	TRUE
ENSG00000174695.10	TMEM167A	7.93749	4.07222e-37	6.87883e-36	TRUE	7.59587	8.14226e-44	3.15711e-42	TRUE
ENSG00000038427.16	VCAN	5.29444	6.66277e-30	7.6225e-29	TRUE	4.5598	1.01845e-17	7.22613e-17	TRUE
ENSG00000127184.13	COX7C	5.35551	4.02753e-22	3.22501e-21	FALSE	5.72076	2.4173e-19	1.86781e-18	TRUE
ENSG00000164180.14	TMEM161B	6.08784	8.95233e-27	8.839e-26	FALSE	6.63812	6.76932e-20	5.39385e-19	TRUE
ENSG00000081189.16	MEF2C	4.48859	1.32731e-21	1.04128e-20	TRUE	3.70887	1.02072e-11	5.30917e-11	FALSE
ENSG00000113356.13	POLR3G	7.30537	2.17566e-29	2.40974e-28	TRUE	7.14307	4.86326e-23	4.63025e-22	TRUE
ENSG00000176018.13	LYSMD3	8.85963	4.59622e-45	1.22887e-43	TRUE	8.22089	3.91009e-39	1.04144e-37	TRUE
ENSG00000164199.18	ADGRV1	3.41981	1.67862e-17	1.10545e-16	FALSE	3.30684	1.65536e-11	8.50922e-11	TRUE
ENSG00000133302.13	SLF1	6.11086	1.72658e-24	1.52518e-23	FALSE	6.63808	1.11349e-24	1.15816e-23	TRUE
ENSG00000198677.12	TTC37	5.72654	6.25687e-40	1.23375e-38	TRUE	6.00325	7.28697e-36	1.52514e-34	TRUE
ENSG00000164292.13	RHOBTB3	6.79802	2.96255e-44	7.50501e-43	TRUE	7.08255	1.56899e-34	2.93854e-33	TRUE
ENSG00000118985.16	ELL2	6.52913	2.5646e-41	5.49553e-40	TRUE	6.2503	2.64413e-30	3.76777e-29	TRUE
ENSG00000153113.24	CAST	5.47451	7.90576e-35	1.17311e-33	TRUE	5.57931	4.41201e-32	7.0245e-31	TRUE
ENSG00000113441.16	LNPEP	4.98564	3.49596e-32	4.51458e-31	TRUE	4.89261	2.08697e-22	1.91296e-21	TRUE
ENSG00000174136.13	RGMB	7.12387	2.79389e-34	4.03908e-33	TRUE	6.28	5.34719e-23	5.07968e-22	TRUE
ENSG00000153922.11	CHD1	6.7748	3.5789e-61	2.97136e-59	TRUE	6.95475	5.1135e-45	2.19144e-43	TRUE
ENSG00000145725.20	PPIP5K2	4.22081	2.86039e-16	1.78482e-15	TRUE	4.94939	9.23474e-22	8.12082e-21	TRUE
ENSG00000181751.10	MACIR	7.63492	3.7838e-24	3.29488e-23	TRUE	7.9951	5.40777e-21	4.56418e-20	TRUE
ENSG00000184349.14	EFNA5	5.734	3.02568e-37	5.14705e-36	TRUE	5.17579	9.17268e-23	8.58502e-22	TRUE
ENSG00000151422.14	FER	6.31135	9.72958e-39	1.79995e-37	TRUE	5.06053	2.92973e-22	2.65907e-21	TRUE
ENSG00000198961.10	PJA2	7.11916	2.05026e-39	3.92941e-38	TRUE	7.49084	7.61437e-37	1.71884e-35	TRUE
ENSG00000112893.10	MAN2A1	5.98811	2.64392e-33	3.62183e-32	TRUE	5.85083	1.691e-26	1.94716e-25	TRUE
ENSG00000164209.17	SLC25A46	6.79017	1.43076e-40	2.9282e-39	TRUE	7.29593	1.15993e-42	4.06438e-41	TRUE
ENSG00000134987.13	WDR36	8.68152	1.80399e-43	4.35741e-42	TRUE	9.35002	1.86253e-33	3.25481e-32	TRUE
ENSG00000164211.13	STARD4	9.16338	2.84118e-16	1.7731e-15	TRUE	7.63865	2.71934e-21	2.33255e-20	TRUE
ENSG00000134982.17	APC	6.61801	2.11764e-48	7.09582e-47	TRUE	6.67839	3.01374e-40	8.69764e-39	TRUE
ENSG00000153037.15	SRP19	4.4771	1.21293e-23	1.03317e-22	TRUE	5.38078	2.24639e-22	2.05467e-21	TRUE
ENSG00000129625.13	REEP5	6.57829	4.91915e-39	9.22514e-38	TRUE	7.17244	4.73566e-37	1.08404e-35	TRUE
ENSG00000172795.17	DCP2	7.41459	1.80061e-65	2.01777e-63	TRUE	8.00725	3.73592e-69	1.40401e-66	TRUE
ENSG00000171444.18	MCC	7.06302	1.62399e-41	3.52602e-40	TRUE	6.05507	9.06364e-34	1.61863e-32	TRUE
ENSG00000047188.16	YTHDC2	5.36589	4.07812e-30	4.72486e-29	TRUE	5.56082	2.97362e-30	4.23024e-29	TRUE
ENSG00000164219.10	PGGT1B	6.72079	3.91221e-40	7.79289e-39	TRUE	6.61483	3.05223e-35	6.07586e-34	TRUE
ENSG00000145780.8	FEM1C	7.67851	7.77876e-52	3.30953e-50	TRUE	8.12466	3.19447e-36	6.85368e-35	TRUE
ENSG00000134970.14	TMED7	13.3219	3.56578e-19	2.52847e-18	TRUE	8.43183	7.23189e-39	1.87936e-37	TRUE
ENSG00000145782.13	ATG12	5.85353	6.75414e-27	6.71224e-26	TRUE	6.31742	7.39799e-27	8.68236e-26	TRUE
ENSG00000177879.17	AP3S1	5.37287	1.89843e-23	1.6054e-22	TRUE	6.20803	6.17133e-27	7.26267e-26	TRUE
ENSG00000092421.17	SEMA6A	5.00382	1.55039e-30	1.84098e-29	TRUE	5.41467	1.03508e-22	9.66119e-22	TRUE
ENSG00000172869.15	DMXL1	5.56687	3.13761e-31	3.8691e-30	TRUE	5.89077	6.27499e-30	8.77344e-29	TRUE
ENSG00000151304.6	SRFBP1	6.80494	2.73943e-25	2.51579e-24	FALSE	8.99161	2.23431e-15	1.40152e-14	TRUE
ENSG00000205302.7	SNX2	6.03537	2.06888e-28	2.19656e-27	TRUE	5.15528	4.75158e-24	4.77799e-23	TRUE
ENSG00000061455.11	PRDM6	5.68612	1.78617e-32	2.33604e-31	TRUE	6.3037	2.66007e-19	2.05076e-18	TRUE
ENSG00000168944.17	CEP120	6.4785	4.84973e-29	5.29995e-28	TRUE	5.57847	9.4042e-27	1.09766e-25	TRUE
ENSG00000151292.18	CSNK1G3	7.62357	6.17627e-54	3.03733e-52	TRUE	7.56896	1.98985e-44	8.08206e-43	TRUE
ENSG00000164902.14	PHAX	6.0998	4.74872e-31	5.79828e-30	TRUE	6.37714	1.05736e-28	1.37389e-27	TRUE
ENSG00000113368.12	LMNB1	5.9121	4.24427e-34	6.0632e-33	TRUE	6.41222	1.05749e-38	2.71102e-37	TRUE
ENSG00000164244.21	PRRC1	7.70596	3.5421e-64	3.70601e-62	TRUE	7.86642	2.12512e-51	1.53327e-49	TRUE
ENSG00000064651.14	SLC12A2	5.1719	9.3994e-25	8.39519e-24	FALSE	5.55893	7.63066e-23	7.18505e-22	TRUE
ENSG00000066583.12	ISOC1	9.46408	1.09074e-17	7.24578e-17	TRUE	6.81349	1.20859e-24	1.25403e-23	TRUE
ENSG00000186687.16	LYRM7	6.97423	1.33458e-28	1.42803e-27	TRUE	6.85974	3.47496e-27	4.1538e-26	TRUE
ENSG00000158985.14	CDC42SE2	9.23994	2.09419e-34	3.03863e-33	TRUE	7.19178	3.57342e-36	7.6571e-35	TRUE
ENSG00000158987.22	RAPGEF6	6.80263	2.435e-38	4.41313e-37	TRUE	6.92617	2.10843e-32	3.42872e-31	TRUE
ENSG00000217128.13	FNIP1	8.09331	2.95799e-43	7.02485e-42	TRUE	7.40187	1.31106e-35	2.6913e-34	TRUE
ENSG00000131437.16	KIF3A	5.33248	1.46673e-21	1.14934e-20	TRUE	5.70275	3.93909e-23	3.77136e-22	TRUE
ENSG00000164402.14	SEPTIN8	7.08005	5.83109e-53	2.66321e-51	TRUE	5.96995	4.46614e-34	8.15471e-33	TRUE
ENSG00000072364.13	AFF4	8.79792	5.41608e-93	5.84566e-90	TRUE	7.97222	2.40035e-77	2.4144e-74	TRUE
ENSG00000155329.12	ZCCHC10	7.15722	8.94527e-28	9.20886e-27	TRUE	6.43737	1.56313e-20	1.2838e-19	TRUE
ENSG00000170606.16	HSPA4	5.71531	8.76639e-44	2.15425e-42	TRUE	5.80853	1.1096e-37	2.65551e-36	TRUE
ENSG00000113583.8	C5orf15	8.29454	1.77177e-43	4.2821e-42	TRUE	10.4557	1.51529e-20	1.246e-19	TRUE
ENSG00000213585.11	VDAC1	8.49557	1.14177e-63	1.16199e-61	TRUE	7.68928	9.07812e-63	1.88159e-60	TRUE
ENSG00000113558.19	SKP1	5.58027	1.94885e-26	1.88871e-25	FALSE	5.56152	1.71883e-20	1.40829e-19	TRUE
ENSG00000113575.10	PPP2CA	8.16038	8.64733e-59	5.87188e-57	TRUE	7.20598	3.75337e-40	1.07147e-38	TRUE
ENSG00000119048.9	UBE2B	5.94048	3.48379e-22	2.79836e-21	FALSE	6.93864	4.66141e-18	3.36675e-17	TRUE
ENSG00000152700.14	SAR1B	6.70328	4.66348e-52	2.00912e-50	TRUE	6.81128	3.25469e-46	1.53739e-44	TRUE
ENSG00000113615.13	SEC24A	7.65568	4.86453e-60	3.72227e-58	TRUE	6.87557	2.10986e-46	1.00916e-44	TRUE
ENSG00000164615.6	CAMLG	6.02599	1.51704e-26	1.47861e-25	TRUE	5.85102	6.71265e-25	7.08755e-24	TRUE
ENSG00000145833.16	DDX46	5.6616	3.98188e-41	8.42688e-40	TRUE	4.93116	1.30676e-20	1.07869e-19	TRUE
ENSG00000181904.9	C5orf24	8.58539	2.79173e-48	9.25626e-47	TRUE	7.47817	1.03313e-39	2.87018e-38	TRUE
ENSG00000113648.17	MACROH2A1	5.09138	7.2643e-34	1.02666e-32	TRUE	4.90667	1.34535e-19	1.05406e-18	TRUE
ENSG00000113658.18	SMAD5	8.18287	6.06172e-79	2.12492e-76	TRUE	8.27266	4.40217e-65	1.09094e-62	TRUE
ENSG00000177733.7	HNRNPA0	7.16066	9.13435e-60	6.82398e-58	TRUE	7.3815	7.19224e-53	5.9992e-51	TRUE
ENSG00000031003.11	FAM13B	6.76598	1.06272e-49	3.89166e-48	TRUE	7.18691	3.41717e-32	5.48914e-31	TRUE
ENSG00000094880.11	CDC23	6.84323	1.66511e-39	3.21226e-38	TRUE	6.81034	2.09344e-34	3.88885e-33	TRUE
ENSG00000120709.11	FAM53C	6.75499	1.24684e-48	4.26149e-47	TRUE	6.95741	5.10383e-43	1.84314e-41	TRUE
ENSG00000120733.14	KDM3B	5.86621	5.75394e-46	1.62305e-44	TRUE	6.53447	2.12526e-41	6.67417e-40	TRUE
ENSG00000120705.13	ETF1	7.32024	5.69571e-66	6.6744e-64	TRUE	7.63816	1.17992e-61	2.19305e-59	TRUE
ENSG00000113013.16	HSPA9	6.23312	1.83458e-59	1.31775e-57	TRUE	6.70303	2.13039e-53	1.88261e-51	TRUE
ENSG00000044115.21	CTNNA1	5.11389	4.903e-28	5.11814e-27	TRUE	4.84424	2.38026e-21	2.0489e-20	TRUE
ENSG00000280987.4	MATR3	8.08218	4.58828e-60	3.53729e-58	TRUE	7.19112	8.17424e-51	5.60222e-49	TRUE
ENSG00000281398.4	SNHG4	6.45496	2.67538e-23	2.2513e-22	FALSE	6.58152	1.7162e-19	1.33696e-18	TRUE
ENSG00000015479.20	MATR3	7.09471	8.93961e-61	7.17513e-59	TRUE	6.83907	1.62936e-50	1.0841e-48	TRUE
ENSG00000120727.13	PAIP2	6.5071	1.56646e-35	2.41348e-34	TRUE	5.74467	7.45087e-24	7.43326e-23	TRUE
ENSG00000170464.10	DNAJC18	4.42139	2.18261e-21	1.69991e-20	FALSE	5.15937	3.92702e-20	3.16596e-19	TRUE
ENSG00000131508.16	UBE2D2	7.44068	1.0595e-57	6.63425e-56	TRUE	7.89381	3.73498e-45	1.62303e-43	TRUE
ENSG00000185129.8	PURA	7.85675	3.2142e-55	1.70982e-53	TRUE	7.21994	1.44067e-35	2.94849e-34	TRUE
ENSG00000113068.10	PFDN1	6.45573	7.92108e-30	9.03434e-29	TRUE	6.80819	7.33773e-24	7.32253e-23	TRUE
ENSG00000131503.21	ANKHD1	6.29466	1.99092e-43	4.78358e-42	TRUE	5.85624	2.11537e-29	2.86169e-28	TRUE
ENSG00000254996.5	ANKHD1-EIF4EBP3	6.86045	1.26544e-42	2.91249e-41	TRUE	6.09926	5.22414e-33	8.87974e-32	TRUE
ENSG00000176087.16	SLC35A4	7.61926	8.49659e-52	3.59257e-50	TRUE	7.30616	6.47317e-40	1.81903e-38	TRUE
ENSG00000146007.11	ZMAT2	5.60568	7.56793e-24	6.50579e-23	TRUE	5.07315	2.92513e-19	2.25004e-18	FALSE
ENSG00000131504.18	DIAPH1	3.86549	1.76235e-25	1.63273e-24	TRUE	4.01583	3.5612e-24	3.60431e-23	TRUE
ENSG00000171720.10	HDAC3	4.0096	7.31169e-16	4.47718e-15	FALSE	4.95242	1.68061e-18	1.24324e-17	TRUE
ENSG00000013561.18	RNF14	7.16776	6.42761e-40	1.2662e-38	TRUE	5.50762	2.75116e-22	2.50164e-21	TRUE
ENSG00000113552.16	GNPDA1	5.42782	1.62462e-28	1.73205e-27	TRUE	5.98829	1.81838e-24	1.86859e-23	TRUE
ENSG00000131507.11	NDFIP1	5.37464	2.6386e-26	2.5362e-25	TRUE	6.9161	2.12038e-25	2.30059e-24	TRUE
ENSG00000113580.15	NR3C1	6.98233	3.15089e-48	1.03883e-46	TRUE	6.91548	1.4142e-34	2.65155e-33	TRUE
ENSG00000145817.17	YIPF5	6.08892	7.45491e-35	1.10741e-33	TRUE	7.57387	3.67856e-23	3.52983e-22	TRUE
ENSG00000133706.19	LARS1	4.74687	1.62964e-32	2.13609e-31	TRUE	4.82766	1.31777e-27	1.6124e-26	TRUE
ENSG00000275740.1	ENSG00000275740	6.51581	5.53778e-33	7.4541e-32	TRUE	6.68095	3.2918e-25	3.52904e-24	TRUE
ENSG00000091009.8	RBM27	7.08362	2.19971e-56	1.25828e-54	TRUE	7.66691	3.52331e-47	1.77457e-45	TRUE
ENSG00000113649.13	TCERG1	6.92109	1.9502e-67	2.63111e-65	TRUE	6.08656	8.04706e-47	3.98265e-45	TRUE
ENSG00000145868.17	FBXO38	4.93002	9.55502e-25	8.53232e-24	TRUE	5.59723	5.36103e-23	5.09142e-22	TRUE
ENSG00000164284.15	GRPEL2	9.3345	1.60631e-70	2.62475e-68	TRUE	8.37216	1.16086e-54	1.15073e-52	TRUE
ENSG00000113712.19	CSNK1A1	7.1323	1.0425e-46	3.08715e-45	TRUE	7.67468	4.38161e-53	3.72753e-51	TRUE
ENSG00000230551.4	ENSG00000230551	7.66815	1.75748e-42	4.0112e-41	TRUE	7.53486	2.45067e-43	9.10983e-42	TRUE
ENSG00000155846.17	PPARGC1B	6.34119	7.42066e-39	1.3809e-37	TRUE	5.8904	2.39896e-36	5.20242e-35	TRUE
ENSG00000155850.9	SLC26A2	7.0864	2.24312e-35	3.42259e-34	TRUE	6.2039	1.19657e-31	1.85081e-30	TRUE
ENSG00000070814.22	TCOF1	4.87583	7.23149e-37	1.20224e-35	TRUE	4.59612	1.76468e-26	2.02995e-25	TRUE
ENSG00000164587.13	RPS14	3.34776	1.71068e-16	1.07908e-15	FALSE	3.52576	4.18231e-15	2.58973e-14	TRUE
ENSG00000070614.15	NDST1	6.55105	1.41181e-46	4.13896e-45	TRUE	5.90272	5.61937e-20	4.50168e-19	TRUE
ENSG00000086589.12	RBM22	7.4266	3.0662e-49	1.08692e-47	TRUE	7.14859	5.54378e-39	1.45728e-37	TRUE
ENSG00000132912.13	DCTN4	7.28521	3.75073e-66	4.55125e-64	TRUE	7.41348	7.62195e-44	2.95872e-42	TRUE
ENSG00000123643.13	SLC36A1	5.35009	7.11526e-29	7.70598e-28	TRUE	6.29236	4.26212e-24	4.29085e-23	TRUE
ENSG00000145907.16	G3BP1	7.8332	2.77893e-91	2.59034e-88	TRUE	6.95461	4.43526e-64	1.02487e-61	TRUE
ENSG00000037749.13	MFAP3	6.29837	9.61555e-48	3.05006e-46	TRUE	6.9664	3.4619e-44	1.37988e-42	TRUE
ENSG00000155506.19	LARP1	7.72774	1.08116e-92	1.10857e-89	TRUE	7.6849	1.91583e-81	2.96964e-78	TRUE
ENSG00000155508.14	CNOT8	6.86597	8.05133e-35	1.19428e-33	TRUE	7.08625	5.3628e-30	7.51957e-29	TRUE
ENSG00000082516.9	GEMIN5	5.6992	1.21276e-30	1.44678e-29	TRUE	5.67709	8.89687e-25	9.30471e-24	TRUE
ENSG00000055163.20	CYFIP2	5.25476	9.92967e-30	1.12564e-28	TRUE	4.67056	2.07858e-19	1.61191e-18	TRUE
ENSG00000155858.6	LSM11	7.24008	2.37747e-33	3.26337e-32	TRUE	7.29209	1.65609e-30	2.38269e-29	TRUE
ENSG00000113282.14	CLINT1	6.75403	7.61728e-38	1.34372e-36	TRUE	7.54556	3.35253e-40	9.62663e-39	TRUE
ENSG00000145860.12	RNF145	6.522	5.33316e-35	7.983e-34	TRUE	6.36181	7.99664e-25	8.39401e-24	TRUE
ENSG00000170234.13	PWWP2A	6.59559	1.36509e-34	2.001e-33	TRUE	7.14622	5.67866e-27	6.69902e-26	TRUE
ENSG00000164609.10	SLU7	6.22261	1.05539e-36	1.72936e-35	TRUE	5.98066	2.54199e-30	3.62374e-29	TRUE
ENSG00000113328.19	CCNG1	7.84358	1.77259e-80	7.65275e-78	TRUE	8.56529	2.08944e-63	4.55138e-61	TRUE
ENSG00000072571.20	HMMR	5.73317	3.23676e-30	3.77352e-29	TRUE	5.90345	1.84616e-22	1.69905e-21	TRUE
ENSG00000038274.18	MAT2B	5.89806	5.9962e-32	7.63989e-31	TRUE	7.21503	1.15668e-27	1.42037e-26	TRUE
ENSG00000113645.15	WWC1	4.39064	1.78066e-22	1.45077e-21	TRUE	3.61547	2.70042e-13	1.52145e-12	FALSE
ENSG00000113643.9	RARS1	5.2283	4.86053e-27	4.85154e-26	FALSE	4.76745	5.99305e-24	6.00341e-23	TRUE
ENSG00000120137.7	PANK3	9.12033	1.11012e-101	2.84566e-98	TRUE	9.86435	3.21108e-94	1.83026e-90	TRUE
ENSG00000253861.1	SLC2A3P1	9.09885	8.00165e-23	6.60056e-22	TRUE	8.91447	2.51199e-26	2.86741e-25	TRUE
ENSG00000040275.17	SPDL1	6.23712	1.74988e-39	3.37422e-38	TRUE	5.63223	3.17278e-26	3.59886e-25	TRUE
ENSG00000181163.14	NPM1	6.27038	1.28436e-76	3.58344e-74	TRUE	6.54335	1.08461e-69	4.469e-67	TRUE
ENSG00000072803.18	FBXW11	8.32225	6.24826e-65	6.79751e-63	TRUE	7.0709	8.50691e-45	3.56529e-43	TRUE
ENSG00000168246.6	UBTD2	8.32448	9.60062e-50	3.53148e-48	TRUE	7.5144	5.67798e-43	2.04192e-41	TRUE
ENSG00000174705.13	SH3PXD2B	5.31695	3.72503e-32	4.80435e-31	TRUE	4.80826	4.81969e-16	3.12235e-15	TRUE
ENSG00000113719.17	ERGIC1	4.30698	1.79917e-29	2.00411e-28	TRUE	4.47406	6.26149e-21	5.26523e-20	TRUE
ENSG00000113732.9	ATP6V0E1	8.50754	3.66113e-25	3.33535e-24	TRUE	6.28858	3.90634e-18	2.83276e-17	TRUE
ENSG00000164463.12	CREBRF	5.07931	1.02787e-35	1.6005e-34	TRUE	5.14812	4.01884e-23	3.84341e-22	TRUE
ENSG00000113739.11	STC2	5.68439	9.43248e-35	1.39461e-33	TRUE	6.00842	2.29606e-27	2.77074e-26	TRUE
ENSG00000145919.11	BOD1	6.91929	3.50425e-44	8.83908e-43	TRUE	7.11132	5.32653e-41	1.62936e-39	TRUE
ENSG00000113742.14	CPEB4	6.50063	2.48908e-44	6.33688e-43	TRUE	6.96442	1.7258e-34	3.2287e-33	TRUE
ENSG00000164466.13	SFXN1	8.04463	8.59283e-80	3.42162e-77	TRUE	8.47569	9.13913e-75	6.64998e-72	TRUE
ENSG00000170085.18	SIMC1	6.85656	1.01398e-50	4.01421e-49	TRUE	6.70068	3.92573e-29	5.24029e-28	TRUE
ENSG00000122203.15	KIAA1191	7.39648	2.75256e-66	3.40041e-64	TRUE	7.42235	3.06593e-62	6.02597e-60	TRUE
ENSG00000175414.7	ARL10	5.66176	5.24959e-47	1.57618e-45	TRUE	5.79459	1.03381e-36	2.30327e-35	TRUE
ENSG00000113194.13	FAF2	7.96426	7.30701e-86	4.75698e-83	TRUE	7.89388	2.28617e-62	4.54563e-60	TRUE
ENSG00000146083.12	RNF44	5.86086	2.28593e-40	4.62302e-39	TRUE	5.50687	9.25723e-23	8.66178e-22	TRUE
ENSG00000087206.17	UIMC1	4.15426	1.72572e-23	1.46176e-22	FALSE	4.63612	7.24163e-22	6.41431e-21	TRUE
ENSG00000113761.12	ZNF346	4.13909	1.63056e-17	1.07448e-16	TRUE	3.75522	2.67377e-11	1.35587e-10	TRUE
ENSG00000165671.22	NSD1	6.6151	1.5219e-65	1.72429e-63	TRUE	7.14314	9.708e-57	1.16085e-54	TRUE
ENSG00000169230.10	PRELID1	4.96163	1.82674e-26	1.77288e-25	TRUE	5.77332	5.04558e-24	5.07064e-23	TRUE
ENSG00000198055.11	GRK6	4.42558	6.09289e-24	5.25649e-23	FALSE	4.31833	3.50661e-13	1.96369e-12	TRUE
ENSG00000145916.19	RMND5B	5.05336	4.40026e-31	5.38241e-30	TRUE	5.3187	2.11835e-19	1.64164e-18	TRUE
ENSG00000197451.12	HNRNPAB	6.01265	2.1927e-40	4.43667e-39	TRUE	6.10895	2.36679e-37	5.55539e-36	TRUE
ENSG00000175309.15	PHYKPL	4.48288	2.60307e-16	1.62747e-15	TRUE	3.33704	1.72407e-08	7.49671e-08	FALSE
ENSG00000169045.17	HNRNPH1	6.25684	1.6664e-59	1.20327e-57	TRUE	6.43844	9.6026e-58	1.30317e-55	TRUE
ENSG00000127022.16	CANX	8.11553	1.82911e-97	2.88534e-94	TRUE	7.56966	3.17699e-83	6.6683e-80	TRUE
ENSG00000161021.13	MAML1	7.89691	1.56087e-51	6.50584e-50	TRUE	6.74893	2.59073e-48	1.43832e-46	TRUE
ENSG00000161011.20	SQSTM1	5.31561	7.84499e-32	9.94604e-31	TRUE	5.1464	1.16964e-21	1.02277e-20	TRUE
ENSG00000197226.13	TBC1D9B	4.62245	2.31749e-31	2.88029e-30	TRUE	4.67617	1.326e-20	1.09404e-19	TRUE
ENSG00000113269.14	RNF130	4.50709	2.24774e-25	2.07585e-24	TRUE	4.00694	6.10899e-13	3.38773e-12	TRUE
ENSG00000050748.18	MAPK9	6.92163	4.57168e-47	1.3787e-45	TRUE	6.41925	1.64955e-37	3.918e-36	TRUE
ENSG00000113300.13	CNOT6	8.15126	1.34224e-74	3.05836e-72	TRUE	7.61556	6.86565e-68	2.23617e-65	TRUE
ENSG00000196670.14	ZFP62	5.99729	6.60713e-31	7.99602e-30	TRUE	5.65418	1.33625e-24	1.38271e-23	TRUE
ENSG00000204628.12	RACK1	5.68205	1.10445e-51	4.63704e-50	TRUE	5.85771	8.02844e-61	1.41528e-58	TRUE
ENSG00000112679.15	DUSP22	4.76465	1.54745e-25	1.43818e-24	TRUE	6.00933	6.63533e-26	7.40606e-25	TRUE
ENSG00000112685.14	EXOC2	5.85522	2.73786e-33	3.74801e-32	TRUE	6.10438	5.83027e-27	6.87076e-26	TRUE
ENSG00000137273.6	FOXF2	6.71543	8.92331e-32	1.12748e-30	TRUE	6.41542	9.34306e-25	9.75346e-24	TRUE
ENSG00000054598.9	FOXC1	9.7188	1.24281e-83	7.38733e-81	TRUE	9.1596	1.05529e-65	2.84173e-63	TRUE
ENSG00000137266.15	SLC22A23	4.58712	1.73859e-18	1.19742e-17	FALSE	4.49336	1.49079e-12	8.11324e-12	TRUE
ENSG00000112739.17	PRPF4B	6.09872	5.72353e-45	1.52059e-43	TRUE	6.54583	3.46465e-35	6.84108e-34	TRUE
ENSG00000153046.18	CDYL	5.70497	1.09637e-30	1.31366e-29	TRUE	5.66207	8.3744e-30	1.16091e-28	TRUE
ENSG00000124785.9	NRN1	6.29037	7.8734e-40	1.54507e-38	TRUE	8.29596	8.01014e-25	8.40561e-24	TRUE
ENSG00000124782.21	RREB1	6.04168	5.55339e-50	2.08196e-48	TRUE	5.65455	1.48791e-32	2.43702e-31	TRUE
ENSG00000124783.14	SSR1	7.78332	1.10819e-81	5.41088e-79	TRUE	7.66449	3.75578e-66	1.07037e-63	TRUE
ENSG00000124784.9	RIOK1	5.39384	3.93933e-22	3.15562e-21	TRUE	5.25708	3.55857e-20	2.87434e-19	TRUE
ENSG00000096696.15	DSP	5.67212	1.48593e-46	4.34693e-45	TRUE	6.45502	2.1507e-47	1.11273e-45	TRUE
ENSG00000168566.13	SNRNP48	7.37238	4.26181e-45	1.14244e-43	TRUE	7.02085	1.72232e-40	5.07774e-39	TRUE
ENSG00000239264.9	TXNDC5	7.65543	5.48448e-55	2.87647e-53	TRUE	7.33696	9.78135e-49	5.73778e-47	TRUE
ENSG00000259040.5	BLOC1S5-TXNDC5	7.34573	4.19527e-56	2.36678e-54	TRUE	7.7269	1.79149e-48	1.01773e-46	TRUE
ENSG00000188428.20	BLOC1S5	6.14679	5.94826e-32	7.58117e-31	TRUE	7.11367	7.90348e-28	9.76839e-27	TRUE
ENSG00000137203.15	TFAP2A	6.50555	1.88128e-62	1.71084e-60	TRUE	6.37543	4.09984e-38	1.01016e-36	TRUE
ENSG00000197977.4	ELOVL2	6.75811	1.4001e-38	2.57391e-37	TRUE	6.06615	1.31853e-26	1.52803e-25	TRUE
ENSG00000224531.6	SMIM13	8.56068	5.14549e-46	1.45643e-44	TRUE	8.36296	3.55665e-46	1.6754e-44	TRUE
ENSG00000205269.6	TMEM170B	7.45577	2.16341e-50	8.32365e-49	TRUE	7.88782	1.08285e-38	2.77187e-37	TRUE
ENSG00000095951.17	HIVEP1	6.38107	1.11619e-53	5.35433e-52	TRUE	6.43419	2.25887e-39	6.11163e-38	TRUE
ENSG00000145990.11	GFOD1	5.09721	1.66099e-30	1.96946e-29	TRUE	4.99384	5.10119e-23	4.85273e-22	TRUE
ENSG00000225921.7	NOL7	6.77883	4.86241e-29	5.31239e-28	TRUE	5.97825	6.01324e-23	5.70133e-22	TRUE
ENSG00000010017.13	RANBP9	7.61102	6.59431e-47	1.96555e-45	TRUE	7.26282	2.64078e-35	5.29378e-34	TRUE
ENSG00000050393.12	MCUR1	6.50725	1.07394e-38	1.9849e-37	TRUE	5.81643	1.37002e-25	1.50557e-24	TRUE
ENSG00000008083.14	JARID2	6.35455	2.26907e-37	3.88251e-36	TRUE	5.84735	3.2979e-28	4.1695e-27	TRUE
ENSG00000124788.19	ATXN1	5.64105	6.19071e-50	2.30195e-48	TRUE	5.8972	8.22359e-39	2.12096e-37	TRUE
ENSG00000137414.7	FAM8A1	8.59409	3.87353e-44	9.74058e-43	TRUE	7.396	6.97128e-35	1.34165e-33	TRUE
ENSG00000124789.12	NUP153	8.13165	8.94476e-88	6.32518e-85	TRUE	7.80931	1.13158e-60	1.9644e-58	TRUE
ENSG00000137177.20	KIF13A	4.48687	6.89995e-28	7.14993e-27	TRUE	4.52721	3.85186e-19	2.93712e-18	TRUE
ENSG00000165097.16	KDM1B	6.72829	5.77486e-29	6.29084e-28	TRUE	5.15921	2.85926e-20	2.32045e-19	TRUE
ENSG00000124795.17	DEK	7.6281	1.04835e-63	1.06958e-61	TRUE	7.94925	7.43684e-73	4.62423e-70	TRUE
ENSG00000172201.12	ID4	7.45296	2.16596e-35	3.31225e-34	TRUE	6.43759	1.14092e-23	1.1264e-22	TRUE
ENSG00000112242.16	E2F3	7.15798	3.91867e-66	4.72232e-64	TRUE	7.77106	6.20049e-46	2.8349e-44	TRUE
ENSG00000145996.11	CDKAL1	6.26196	1.22834e-33	1.70777e-32	TRUE	6.04936	2.02613e-26	2.32133e-25	TRUE
ENSG00000124766.7	SOX4	7.81778	5.53546e-72	1.06089e-69	TRUE	8.83032	2.69979e-47	1.37396e-45	TRUE
ENSG00000124532.15	MRS2	7.15889	9.56823e-37	1.5754e-35	TRUE	7.41031	1.7338e-34	3.24011e-33	TRUE
ENSG00000112294.14	ALDH5A1	6.33408	2.22624e-31	2.77023e-30	TRUE	5.62218	1.75093e-22	1.61446e-21	TRUE
ENSG00000111802.14	TDP2	7.25974	5.28813e-34	7.5282e-33	TRUE	6.18263	6.45725e-28	8.00985e-27	TRUE
ENSG00000112308.13	C6orf62	8.37675	6.37532e-54	3.13147e-52	TRUE	8.60623	4.7871e-50	3.10653e-48	TRUE
ENSG00000286522.2	H3C2	5.42439	1.41543e-22	1.1585e-21	TRUE	4.65705	1.07329e-25	1.18405e-24	TRUE
ENSG00000187837.4	H1-2	4.317	3.91891e-22	3.13992e-21	FALSE	4.71951	7.9884e-29	1.04592e-27	TRUE
ENSG00000168298.7	H1-4	5.14019	8.11517e-41	1.68695e-39	TRUE	5.10646	1.17138e-38	2.98956e-37	TRUE
ENSG00000182952.5	HMGN4	9.34177	1.27304e-29	1.4348e-28	TRUE	10.5363	9.01316e-21	7.51808e-20	TRUE
ENSG00000181315.11	ZNF322	6.44898	2.94858e-24	2.57688e-23	FALSE	9.99826	3.04975e-12	1.63298e-11	TRUE
ENSG00000196787.4	H2AC11	4.29533	5.36352e-21	4.11253e-20	FALSE	4.98403	1.34419e-20	1.10877e-19	TRUE
ENSG00000197903.8	H2BC12	3.98961	2.88326e-23	2.42473e-22	TRUE	4.34385	1.6183e-16	1.07716e-15	TRUE
ENSG00000204789.5	ZNF204P	8.58188	4.70381e-24	4.083e-23	TRUE	7.6321	9.09318e-25	9.5013e-24	TRUE
ENSG00000124613.9	ZNF391	7.00599	1.63978e-37	2.83652e-36	TRUE	7.31759	2.33902e-25	2.533e-24	TRUE
ENSG00000198315.11	ZKSCAN8	9.64601	1.43677e-79	5.55923e-77	TRUE	7.51008	1.7594e-53	1.57512e-51	TRUE
ENSG00000158691.15	ZSCAN12	5.53576	1.11001e-36	1.81523e-35	TRUE	5.31772	3.9476e-26	4.46294e-25	TRUE
ENSG00000204713.11	TRIM27	6.78787	1.82411e-36	2.9466e-35	TRUE	6.16054	1.32399e-26	1.53385e-25	TRUE
ENSG00000204619.8	PPP1R11	5.67348	5.71592e-24	4.94063e-23	TRUE	4.89786	7.98676e-17	5.38206e-16	TRUE
ENSG00000234127.9	TRIM26	5.80698	4.73221e-38	8.43122e-37	TRUE	5.81009	1.24879e-22	1.1599e-21	TRUE
ENSG00000231074.10	HCG18	4.65389	5.71747e-28	5.95319e-27	TRUE	5.06079	3.6028e-22	3.25078e-21	TRUE
ENSG00000204576.12	PRR3	6.59325	1.94208e-09	8.87887e-09	TRUE	6.08197	4.77948e-29	6.34771e-28	TRUE
ENSG00000204574.14	ABCF1	4.61716	1.8446e-26	1.78979e-25	TRUE	4.98989	8.47836e-26	9.41707e-25	TRUE
ENSG00000204569.10	PPP1R10	7.01359	2.89655e-59	2.04122e-57	TRUE	7.23237	1.54035e-42	5.32643e-41	TRUE
ENSG00000137337.16	MDC1	6.33798	1.09965e-56	6.49872e-55	TRUE	5.43182	6.84407e-33	1.15187e-31	TRUE
ENSG00000196230.14	TUBB	8.20883	1.24437e-101	3.00215e-98	TRUE	8.56732	1.46511e-86	3.85425e-83	TRUE
ENSG00000272540.1	ENSG00000272540	7.41445	7.00465e-32	8.89989e-31	TRUE	6.79854	1.34914e-29	1.84336e-28	TRUE
ENSG00000137310.12	TCF19	7.45628	6.87048e-29	7.44678e-28	TRUE	6.24223	8.68223e-26	9.63724e-25	TRUE
ENSG00000198563.14	DDX39B	4.8642	5.48321e-33	7.38307e-32	TRUE	4.99908	3.29743e-25	3.53286e-24	TRUE
ENSG00000204469.13	PRRC2A	6.0308	5.77875e-59	4.00354e-57	TRUE	5.83376	1.13678e-40	3.39238e-39	TRUE
ENSG00000204463.14	BAG6	4.53181	1.04176e-26	1.02561e-25	TRUE	4.56733	1.20508e-19	9.4698e-19	TRUE
ENSG00000204388.7	HSPA1B	7.05189	9.74646e-64	9.99354e-62	TRUE	7.22199	2.88101e-48	1.5943e-46	TRUE
ENSG00000285565.1	ENSG00000285565	6.24518	2.41668e-22	1.95383e-21	FALSE	6.22693	9.17166e-21	7.64469e-20	TRUE
ENSG00000204310.13	AGPAT1	6.3525	1.70658e-46	4.96408e-45	TRUE	5.67398	8.99863e-26	9.96581e-25	TRUE
ENSG00000204304.12	PBX2	5.42198	7.67783e-29	8.2999e-28	TRUE	6.12512	2.93463e-25	3.16398e-24	TRUE
ENSG00000204256.14	BRD2	7.1475	8.9542e-89	6.80088e-86	TRUE	7.42655	3.38848e-53	2.91895e-51	TRUE
ENSG00000231500.7	RPS18	4.38078	1.88675e-32	2.466e-31	TRUE	4.23872	5.74746e-27	6.77551e-26	TRUE
ENSG00000137309.20	HMGA1	7.88918	3.69405e-79	1.35275e-76	TRUE	7.48529	8.56749e-63	1.78658e-60	TRUE
ENSG00000225339.4	ENSG00000225339	6.27174	1.20186e-35	1.86011e-34	TRUE	6.53864	2.64393e-29	3.56123e-28	TRUE
ENSG00000272325.2	NUDT3	6.62263	1.25141e-44	3.22801e-43	TRUE	6.68633	3.3887e-39	9.05393e-38	TRUE
ENSG00000270800.3	RPS10-NUDT3	5.60596	5.09465e-41	1.071e-39	TRUE	5.55218	1.91645e-36	4.19058e-35	TRUE
ENSG00000124614.16	RPS10	5.14773	4.9447e-31	6.02859e-30	TRUE	5.14146	2.25509e-27	2.72323e-26	TRUE
ENSG00000196821.10	ILRUN	6.53996	4.3916e-44	1.10096e-42	TRUE	7.28399	3.45474e-40	9.9118e-39	TRUE
ENSG00000065060.18	UHRF1BP1	6.20621	4.91615e-46	1.39441e-44	TRUE	6.25384	4.10624e-41	1.26627e-39	TRUE
ENSG00000064999.15	ANKS1A	4.78554	1.0385e-28	1.11529e-27	TRUE	4.92093	7.66882e-21	6.42179e-20	TRUE
ENSG00000198755.11	RPL10A	5.30573	1.79398e-33	2.47739e-32	TRUE	5.96792	3.36456e-38	8.34407e-37	TRUE
ENSG00000096060.15	FKBP5	6.09957	1.0882e-48	3.73798e-47	TRUE	6.27534	4.74709e-37	1.08592e-35	TRUE
ENSG00000197753.11	LHFPL5	7.1713	1.10791e-41	2.42475e-40	TRUE	7.32745	8.14548e-36	1.69755e-34	TRUE
ENSG00000096063.16	SRPK1	7.42003	2.52031e-70	4.05364e-68	TRUE	8.45157	2.2354e-49	1.36515e-47	TRUE
ENSG00000112062.11	MAPK14	7.16324	6.26683e-42	1.3916e-40	TRUE	6.56731	1.00017e-35	2.06675e-34	TRUE
ENSG00000096070.19	BRPF3	6.291	6.72768e-52	2.87426e-50	TRUE	6.24079	7.43466e-38	1.80069e-36	TRUE
ENSG00000112078.14	KCTD20	7.05169	1.86782e-55	1.01332e-53	TRUE	7.50851	3.99008e-58	5.6155e-56	TRUE
ENSG00000112079.9	STK38	6.39327	1.37458e-39	2.66938e-38	TRUE	6.52967	2.16283e-29	2.92474e-28	TRUE
ENSG00000112081.17	SRSF3	7.56631	6.90749e-65	7.49481e-63	TRUE	7.30677	6.12329e-57	7.47449e-55	TRUE
ENSG00000137168.8	PPIL1	7.5798	5.49995e-39	1.02908e-37	TRUE	7.26978	1.05299e-32	1.74811e-31	TRUE
ENSG00000198663.17	C6orf89	6.10303	2.23159e-43	5.33681e-42	TRUE	6.51738	5.08327e-40	1.44268e-38	TRUE
ENSG00000137409.21	MTCH1	4.12175	4.58733e-23	3.82797e-22	TRUE	4.0969	8.45525e-17	5.69663e-16	TRUE
ENSG00000065491.8	TBC1D22B	6.85397	3.59216e-37	6.08042e-36	TRUE	6.48194	7.79699e-31	1.1454e-29	TRUE
ENSG00000112130.17	RNF8	4.58247	2.77677e-20	2.06803e-19	FALSE	5.40808	7.44195e-22	6.58662e-21	TRUE
ENSG00000156639.12	ZFAND3	6.9029	1.4079e-47	4.42142e-46	TRUE	6.59152	1.75102e-34	3.26872e-33	TRUE
ENSG00000124767.7	GLO1	8.52719	6.8149e-98	1.21524e-94	TRUE	8.29691	4.32925e-83	8.22533e-80	TRUE
ENSG00000001167.15	NFYA	7.89562	8.76394e-46	2.44354e-44	TRUE	8.60288	1.10806e-37	2.65368e-36	TRUE
ENSG00000137166.17	FOXP4	4.33577	4.20489e-26	4.01255e-25	TRUE	4.65478	1.44302e-14	8.6655e-14	TRUE
ENSG00000164663.15	USP49	4.73925	4.09868e-21	3.15984e-20	TRUE	4.64867	7.93426e-17	5.34773e-16	TRUE
ENSG00000124641.16	MED20	6.16553	3.1917e-26	3.06138e-25	TRUE	7.35414	1.63174e-17	1.14376e-16	FALSE
ENSG00000137413.17	TAF8	5.0968	1.94382e-27	1.97679e-26	TRUE	5.65239	2.98633e-26	3.39301e-25	TRUE
ENSG00000048544.6	MRPS10	7.46986	1.07073e-37	1.87111e-36	TRUE	9.00277	5.63397e-26	6.31311e-25	TRUE
ENSG00000024048.11	UBR2	4.99878	5.25954e-31	6.39913e-30	TRUE	5.19487	2.67382e-25	2.88825e-24	TRUE
ENSG00000112624.13	BICRAL	6.46853	6.14617e-41	1.28415e-39	TRUE	5.80227	3.26084e-24	3.30619e-23	TRUE
ENSG00000146223.16	RPL7L1	7.29144	1.31712e-74	3.01791e-72	TRUE	8.38009	1.92118e-60	3.25259e-58	TRUE
ENSG00000112640.16	PPP2R5D	5.81981	6.72295e-33	9.01095e-32	TRUE	6.04622	3.01227e-25	3.24462e-24	TRUE
ENSG00000124733.5	MEA1	5.60567	1.74298e-25	1.61515e-24	TRUE	5.0047	2.89578e-17	2.00228e-16	TRUE
ENSG00000124702.19	KLHDC3	5.23356	7.74539e-32	9.8228e-31	TRUE	5.95162	3.54278e-23	3.40527e-22	TRUE
ENSG00000124541.7	RRP36	5.40372	1.06478e-29	1.20604e-28	TRUE	5.18858	4.55789e-22	4.09121e-21	TRUE
ENSG00000112658.8	SRF	5.83971	9.59704e-38	1.68427e-36	TRUE	6.65344	1.57108e-29	2.13806e-28	TRUE
ENSG00000171467.16	ZNF318	5.25161	2.67883e-38	4.8422e-37	TRUE	4.44686	2.66149e-16	1.74938e-15	TRUE
ENSG00000137221.14	TJAP1	5.1335	7.29541e-28	7.55209e-27	TRUE	5.07757	4.75685e-19	3.60948e-18	TRUE
ENSG00000124571.18	XPO5	5.10909	4.01817e-31	4.92827e-30	TRUE	5.6777	1.08098e-26	1.2553e-25	TRUE
ENSG00000112715.26	VEGFA	3.74702	4.10689e-19	2.90364e-18	FALSE	3.27854	3.8336e-10	1.83185e-09	TRUE
ENSG00000096384.20	HSP90AB1	6.14185	1.10469e-56	6.51909e-55	TRUE	6.01108	1.18533e-56	1.40267e-54	TRUE
ENSG00000096401.8	CDC5L	7.51126	3.54041e-44	8.92478e-43	TRUE	6.80906	2.65606e-49	1.60769e-47	TRUE
ENSG00000001561.7	ENPP4	7.91741	5.8069e-26	5.49398e-25	TRUE	7.43413	2.18942e-19	1.69633e-18	TRUE
ENSG00000146072.6	TNFRSF21	7.44181	8.17422e-28	8.4384e-27	TRUE	5.17266	2.32944e-16	1.53555e-15	FALSE
ENSG00000198087.7	CD2AP	7.36723	2.4442e-57	1.50294e-55	TRUE	8.08524	4.44783e-46	2.05834e-44	TRUE
ENSG00000031691.7	CENPQ	7.12911	5.53304e-26	5.24335e-25	TRUE	7.28874	1.30368e-24	1.35023e-23	TRUE
ENSG00000112118.20	MCM3	6.01148	2.57679e-49	9.16605e-48	TRUE	6.45879	9.89191e-48	5.26937e-46	TRUE
ENSG00000065308.5	TRAM2	4.93792	1.34319e-20	1.01398e-19	TRUE	4.7177	1.45942e-16	9.73489e-16	TRUE
ENSG00000112144.16	CILK1	6.93256	5.22643e-44	1.30071e-42	TRUE	8.54008	6.70963e-31	9.91199e-30	TRUE
ENSG00000112146.17	FBXO9	5.25273	2.14434e-29	2.37633e-28	TRUE	5.69408	6.89397e-25	7.26554e-24	TRUE
ENSG00000012660.14	ELOVL5	8.0781	6.7845e-60	5.13394e-58	TRUE	7.6985	9.89068e-48	5.26937e-46	TRUE
ENSG00000151914.22	DST	5.18627	3.78642e-48	1.2394e-46	TRUE	4.86089	2.26105e-35	4.5566e-34	TRUE
ENSG00000112200.17	ZNF451	7.49767	2.12167e-63	2.08178e-61	TRUE	6.7347	7.53402e-44	2.92791e-42	TRUE
ENSG00000112208.11	BAG2	8.1145	2.20293e-33	3.03192e-32	TRUE	7.6162	1.40871e-28	1.81935e-27	TRUE
ENSG00000112210.12	RAB23	7.29359	1.88233e-31	2.35157e-30	TRUE	7.53152	2.52955e-26	2.88552e-25	TRUE
ENSG00000146143.19	PRIM2	6.30595	6.59186e-29	7.15424e-28	TRUE	6.15414	2.24477e-23	2.18031e-22	FALSE
ENSG00000112245.13	PTP4A1	8.80433	8.46109e-69	1.27582e-66	TRUE	8.55733	2.97247e-57	3.80733e-55	TRUE
ENSG00000285976.2	ENSG00000285976	8.80316	1.14058e-69	1.79233e-67	TRUE	9.06913	1.82278e-53	1.62337e-51	TRUE
ENSG00000118482.12	PHF3	6.80491	7.33387e-68	1.01963e-65	TRUE	6.98923	6.38105e-50	4.08662e-48	TRUE
ENSG00000082269.17	FAM135A	6.86063	3.97463e-50	1.50383e-48	TRUE	5.71391	2.74559e-25	2.96483e-24	TRUE
ENSG00000119900.9	OGFRL1	8.90211	1.97159e-27	2.00453e-26	TRUE	7.33445	2.55239e-35	5.12862e-34	TRUE
ENSG00000156508.19	EEF1A1	1.35417	0.000829041	0.00269838	FALSE	2.11851	1.39435e-07	5.75146e-07	TRUE
ENSG00000112697.17	TMEM30A	6.91679	1.30279e-30	1.55146e-29	TRUE	6.66811	3.96743e-38	9.78948e-37	TRUE
ENSG00000112701.18	SENP6	5.98799	1.68252e-44	4.31293e-43	TRUE	6.03539	8.07303e-34	1.44701e-32	TRUE
ENSG00000196586.17	MYO6	5.90407	4.05787e-35	6.12097e-34	TRUE	6.08814	1.4378e-33	2.52809e-32	TRUE
ENSG00000146247.14	PHIP	6.99699	1.59355e-67	2.17136e-65	TRUE	7.17783	6.72838e-56	7.42271e-54	TRUE
ENSG00000198478.8	SH3BGRL2	7.98198	1.01505e-39	1.98244e-38	TRUE	7.8309	3.40916e-31	5.14291e-30	TRUE
ENSG00000112742.10	TTK	7.16252	4.19108e-35	6.31031e-34	TRUE	6.37734	2.29211e-29	3.09711e-28	TRUE
ENSG00000112773.16	TENT5A	9.69338	2.72956e-19	1.94527e-18	TRUE	8.43192	1.56127e-24	1.61019e-23	TRUE
ENSG00000005700.15	IBTK	6.39651	1.70814e-37	2.95229e-36	TRUE	7.30665	1.25601e-34	2.37186e-33	TRUE
ENSG00000083097.15	DOP1A	6.05835	8.41038e-29	9.07268e-28	TRUE	6.29034	1.68e-27	2.04609e-26	TRUE
ENSG00000013375.16	PGM3	7.19223	1.46707e-37	2.54421e-36	TRUE	7.67327	4.98155e-31	7.41035e-30	TRUE
ENSG00000065833.9	ME1	5.35855	5.51931e-22	4.39551e-21	FALSE	6.32851	7.33721e-20	5.8314e-19	TRUE
ENSG00000065615.14	CYB5R4	5.62086	2.07978e-24	1.83048e-23	FALSE	5.53367	0.000186829	0.000617627	TRUE
ENSG00000112837.17	TBX18	6.3451	3.56551e-36	5.69011e-35	TRUE	5.90779	1.38712e-23	1.36238e-22	TRUE
ENSG00000271793.2	ENSG00000271793	5.79985	6.41191e-45	1.69445e-43	TRUE	6.57908	1.00483e-40	3.01441e-39	TRUE
ENSG00000135316.19	SYNCRIP	7.30118	1.01618e-71	1.90308e-69	TRUE	7.49073	2.44486e-48	1.36398e-46	TRUE
ENSG00000188994.13	ZNF292	6.83254	2.33734e-53	1.09184e-51	TRUE	6.65987	1.31007e-41	4.19504e-40	TRUE
ENSG00000135336.16	ORC3	6.23839	1.95677e-21	1.52634e-20	TRUE	6.48662	1.51714e-24	1.56609e-23	TRUE
ENSG00000135334.9	AKIRIN2	7.11154	2.12455e-50	8.18183e-49	TRUE	7.58108	6.6866e-36	1.40291e-34	TRUE
ENSG00000111880.16	RNGTT	6.61799	9.04083e-34	1.26769e-32	TRUE	6.78004	6.72055e-25	7.09371e-24	TRUE
ENSG00000146278.11	PNRC1	8.21475	2.36691e-51	9.77607e-50	TRUE	7.80278	3.04268e-38	7.56227e-37	TRUE
ENSG00000146281.6	PM20D2	6.51067	1.0239e-40	2.11559e-39	TRUE	7.13186	1.11932e-36	2.48407e-35	TRUE
ENSG00000198833.7	UBE2J1	6.9019	3.53408e-49	1.24954e-47	TRUE	7.50408	9.85039e-09	4.33278e-08	TRUE
ENSG00000025039.15	RRAGD	6.38646	3.66703e-39	6.91811e-38	TRUE	6.32592	2.50964e-33	4.3545e-32	TRUE
ENSG00000083099.11	LYRM2	7.54863	2.41376e-53	1.12625e-51	TRUE	7.92722	1.51841e-41	4.83053e-40	TRUE
ENSG00000112159.12	MDN1	4.36514	8.50802e-34	1.19503e-32	TRUE	5.42933	1.52375e-35	3.11108e-34	TRUE
ENSG00000118412.13	CASP8AP2	8.15758	1.13549e-57	7.07768e-56	TRUE	6.82336	1.79252e-43	6.73654e-42	TRUE
ENSG00000112182.16	BACH2	5.18138	3.62347e-30	4.21597e-29	TRUE	6.03768	7.68189e-18	5.48805e-17	TRUE
ENSG00000135341.18	MAP3K7	8.1384	1.1285e-38	2.08112e-37	TRUE	6.94493	6.32089e-40	1.7777e-38	TRUE
ENSG00000172469.17	MANEA	6.42454	1.94872e-34	2.83421e-33	TRUE	8.23025	7.42928e-18	5.31091e-17	TRUE
ENSG00000112218.9	GPR63	7.82123	6.604e-29	7.16551e-28	TRUE	7.22203	2.22379e-23	2.16117e-22	TRUE
ENSG00000146263.12	MMS22L	6.6539	1.21341e-59	8.91879e-58	TRUE	6.56013	9.75758e-50	6.15682e-48	TRUE
ENSG00000184486.10	POU3F2	7.0891	3.82427e-45	1.02717e-43	TRUE	7.21566	1.26629e-32	2.09207e-31	TRUE
ENSG00000112234.9	FBXL4	7.00768	5.78548e-35	8.64114e-34	TRUE	6.13817	5.27601e-23	5.01485e-22	TRUE
ENSG00000146267.12	FAXC	6.33449	1.38138e-30	1.6422e-29	TRUE	5.71255	7.23041e-23	6.81567e-22	TRUE
ENSG00000132424.17	PNISR	4.38968	1.29046e-16	8.18165e-16	FALSE	5.13821	3.0787e-21	2.63155e-20	TRUE
ENSG00000112237.13	CCNC	8.04971	1.55703e-36	2.52512e-35	TRUE	6.74526	5.81226e-34	1.0545e-32	TRUE
ENSG00000112246.10	SIM1	5.91788	8.46261e-29	9.12422e-28	TRUE	5.13109	3.11886e-18	2.27327e-17	TRUE
ENSG00000112249.14	ASCC3	6.10868	2.75594e-40	5.54896e-39	TRUE	6.13304	9.49584e-38	2.28696e-36	TRUE
ENSG00000187772.8	LIN28B	6.93095	4.67951e-41	9.8575e-40	TRUE	8.02239	1.50296e-62	3.04141e-60	TRUE
ENSG00000057663.16	ATG5	6.73497	5.81922e-30	6.68729e-29	TRUE	6.70816	1.1588e-29	1.58837e-28	TRUE
ENSG00000178409.14	BEND3	5.53378	7.93035e-33	1.05946e-31	TRUE	5.81326	1.99169e-27	2.41025e-26	TRUE
ENSG00000112320.12	SOBP	5.68647	1.10852e-29	1.25455e-28	TRUE	5.23803	1.2807e-17	9.02876e-17	FALSE
ENSG00000025796.14	SEC63	6.44884	4.27448e-41	9.02283e-40	TRUE	5.59655	1.01378e-32	1.68712e-31	TRUE
ENSG00000112335.15	SNX3	7.37795	5.69563e-48	1.83504e-46	TRUE	7.07258	2.37889e-34	4.41192e-33	TRUE
ENSG00000118689.15	FOXO3	7.78549	7.16252e-74	1.57093e-71	TRUE	7.89145	2.36878e-53	2.07187e-51	TRUE
ENSG00000135535.17	CD164	8.39777	5.62658e-54	2.777e-52	TRUE	8.19903	5.30474e-50	3.42943e-48	TRUE
ENSG00000112365.5	ZBTB24	7.80268	8.19181e-48	2.60651e-46	TRUE	8.34586	6.26069e-35	1.20761e-33	TRUE
ENSG00000112290.13	WASF1	6.55393	5.92909e-51	2.39818e-49	TRUE	7.07361	5.63178e-41	1.71965e-39	TRUE
ENSG00000168438.15	CDC40	6.17186	9.68878e-34	1.35669e-32	TRUE	6.25738	7.72507e-27	9.05069e-26	TRUE
ENSG00000155111.15	CDK19	6.78036	1.32259e-33	1.8357e-32	TRUE	6.10959	6.02163e-28	7.48033e-27	TRUE
ENSG00000123505.19	AMD1	8.25776	6.45967e-88	4.64801e-85	TRUE	8.46347	1.78292e-82	3.20915e-79	TRUE
ENSG00000197498.13	RPF2	6.41588	5.88685e-41	1.23123e-39	TRUE	6.00601	3.84926e-36	8.22242e-35	TRUE
ENSG00000112394.18	SLC16A10	5.40894	2.93142e-24	2.56243e-23	TRUE	5.19003	1.78278e-20	1.45964e-19	FALSE
ENSG00000173214.7	MFSD4B	4.85271	7.24534e-25	6.50669e-24	TRUE	5.07783	4.31816e-22	3.88113e-21	TRUE
ENSG00000009413.16	REV3L	7.34961	1.22161e-56	7.16784e-55	TRUE	7.25387	7.13274e-61	1.27048e-58	TRUE
ENSG00000010810.17	FYN	5.04745	1.65982e-36	2.68545e-35	TRUE	5.0853	3.1949e-22	2.88901e-21	TRUE
ENSG00000277443.3	MARCKS	7.74929	5.74662e-53	2.62756e-51	TRUE	8.52021	9.50421e-46	4.27677e-44	TRUE
ENSG00000196591.12	HDAC2	5.14509	1.59705e-40	3.2604e-39	TRUE	5.96374	1.02502e-46	5.02937e-45	TRUE
ENSG00000187189.11	TSPYL4	6.2067	8.23548e-40	1.61535e-38	TRUE	6.41248	1.0045e-21	8.81973e-21	TRUE
ENSG00000111817.19	DSE	4.1949	2.90544e-27	2.93146e-26	TRUE	4.30534	8.43627e-19	6.33536e-18	TRUE
ENSG00000189241.8	TSPYL1	7.24556	1.71253e-65	1.92961e-63	TRUE	8.21233	2.72336e-53	2.36252e-51	TRUE
ENSG00000111832.13	RWDD1	7.11718	2.59968e-30	3.04463e-29	TRUE	5.82274	4.03562e-28	5.07405e-27	TRUE
ENSG00000196911.11	KPNA5	6.55459	1.17661e-34	1.73028e-33	TRUE	5.43489	2.8878e-24	2.93754e-23	TRUE
[truncated: 3,061 more rows]

## Sheet: Supplementary Fig.1e,f
Enrichment analysis of EPN24-IGF2BP1 versus EPN24-GFP and versus EPN24 in HEK293T, related to Supplementary Fig.1e,f
[truncated: 4,654 more rows]

[truncated: 10 more sheets: Fig.1g, Fig.1h, Supplementary Fig.1j, Supplementary Fig.1l, Fig.2e, Fig.2g,h, Fig.3a & Supplementary Fig.3b, Fig.3d & Supplementary Fig.3d, Fig.4e,f & Supplementary Fig.4e, Fig.4g]
