# Supplementary material for: Longitudinal and large-scale monitoring of transcriptome and RBP-RNA interactome in living cells by engineered protein nanocages
Source: Research Square preprint supplement (doi:10.21203/rs.3.rs-6053638/v1), 2025-03-26
Supplement: Supplementary file 2 [file e931c5b0e50b801868006005.xlsx]

## Sheet: Legend
Table S1. Sequence of constructs, PCR and qPCR primers, related to Figs.1-4.
S1-1	Sequences of VLP or EPN24-RBPs, related to Figs.1-4.
S1-2	Annotation of FMR1 mutations, related to Fig.4.
S1-3	Sequence of PCR primers for constructs, related to Figs.1-4.
S1-4	Sequence of qPCR primers related to Supplementary Fig.1a and Supplementary Fig.4d.

## Sheet: S1-1
Sequences of VLP or EPN24-RBPs, related to Figs.1-4.
EPN24	ATGCACGGTCTGCAGGACGACCCGGACCTGCAAGCACTGCTCAAGGGCAGCCAGCTGCTGAAAGTTAAATCTTCTTCTTGGCGTCGTGAACGTTTCTACAAACTCCAGGAGGACTGCAAAACCATCTGGCAGGAATCCCGTAAAGTTATGCGTTCTCCGGAATCTCAGCTGTTCTCTATCGAAGACATCCAGGAAGTTCGTATGGGTCACCGTACCGAAGGTCTGGAAAAATTCGCGCGTGACATCCCGGAAGACCGTTGCTTCTCCATCGTTTTCAAAGACCAGCGTAACACCCTGGACCTGATCGCGCCGTCTCCGGCGGACGCGCAGCACTGGGTTCAGGGTCTGCGTAAAATCATCCACCACTCTGGTTCTATGGACCAACGTCAGAAACTGCAG…
HIVgag-SLBP	ATGGGCGCCCGCGCCAGCGTGCTGTCGGGCGGCGAGCTGGACCGCTGGGAGAAGATCCGCCTGCGCCCCGGCGGCAAAAAGAAGTACAAGCTGAAGCACATCGTGTGGGCCAGCCGCGAACTGGAGCGCTTCGCCGTGAACCCCGGGCTCCTGGAGACCAGCGAGGGGTGCCGCCAGATCCTCGGCCAACTGCAGCCCAGCCTGCAAACCGGCAGCGAGGAGCTGCGCAGCCTGTACAACACCGTGGCCACGCTGTACTGCGTCCACCAGCGCATCGAAATCAAGGATACGAAAGAGGCCCTGGATAAAATCGAAGAGGAACAGAATAAGAGCAAAAAGAAGGCCCAACAGGCCGCCGCGGACACCGGACACAGCAACCAGGTCAGCCAGAACTACCCC…
HIVgag-ZIP-SLBP	ATGGGTGCGAGAGCGTCAGTATTAAGCGGGGGAGAATTAGATCGATGGGAAAAAATTCGGTTAAGGCCAGGGGGAAAGAAGAAGTACAAGCTAAAGCACATCGTATGGGCAAGCAGGGAGCTAGAACGATTCGCAGTTAATCCTGGCCTGTTAGAAACATCAGAAGGCTGTAGACAAATACTGGGACAGCTACAACCATCCCTTCAGACAGGATCAGAGGAGCTTCGATCACTATACAACACAGTAGCAACCCTCTATTGTGTGCACCAGCGGATCGAGATCAAGGACACCAAGGAAGCTTTAGACAAGATAGAGGAAGAGCAAAACAAGTCCAAGAAGAAGGCCCAGCAGGCAGCAGCTGACACAGGACACAGCAATCAGGTCAGCCAAAATTACCCT…
mPEG10-SLBP	ATGGCTGCTGCGGGTGGTTCCTCCAACTGCCCGCCCCCTCCCCCTCCCCCTCCTCCCAACAACAACAACAACAACAACACCCCAAAGAGCCCAGGCGTGCCTGACGCCGAAGATGATGATGAACGCAGACACGATGAGCTCCCTGAAGACATCAACAACTTTGACGAAGACATGAACAGGCAGTTTGAGAATATGAACCTGCTGGATCAGGTGGAGTTGCTTGCACAGAGCTACAGTCTGCTGGATCATTTAGATGACTTTGATGATGATGATGAAGACGATGACTTTGATCCAGAACCTGACCAGGATGAGCTCCCTGAGTACAGTGACGATGATGACCTGGAGCTTCAGGGTGCTGCAGCAGCCCCTATCCCAAACTTTTTCTCCGATGATGACTGC…
hPEG10-SLBP	ATGCTGGGTCCCGACTGCCCACCTCCTCCTCCTCCCCCTCCCCCCAACAACAACAACAACAACAACTCCAAGCACACCGGCCATAAGAGTGCGTGTGTCCCCAACATGACCGAACGAAGAAGGGACGAGCTCTCTGAAGAGATCAACAACTTAAGAGAGAAGGTCATGAAGCAGTCGGAGGAGAACAACAACCTGCAGAGCCAGGTGCAGAAGCTCACAGAGGAGAACACCACCCTTCGAGAGCAAGTGGAACCCACCCCTGAGGATGAGGATGATGACATCGAGCTCCGCGGTGCTGCAGCAGCTGCTGCCCCACCCCCTCCAATAGAGGAAGAGTGCCCAGAAGACCTCCCAGAGAAGTTCGATGGCAACCCAGACATGCTGGCTCCTTTCATGGCC…
EPN24-GFP	ATGCACGGTCTGCAGGACGACCCGGACCTGCAAGCACTGCTCAAGGGCAGCCAGCTGCTGAAAGTTAAATCTTCTTCTTGGCGTCGTGAACGTTTCTACAAACTCCAGGAGGACTGCAAAACCATCTGGCAGGAATCCCGTAAAGTTATGCGTTCTCCGGAATCTCAGCTGTTCTCTATCGAAGACATCCAGGAAGTTCGTATGGGTCACCGTACCGAAGGTCTGGAAAAATTCGCGCGTGACATCCCGGAAGACCGTTGCTTCTCCATCGTTTTCAAAGACCAGCGTAACACCCTGGACCTGATCGCGCCGTCTCCGGCGGACGCGCAGCACTGGGTTCAGGGTCTGCGTAAAATCATCCACCACTCTGGTTCTATGGACCAACGTCAGAAACTGCAG…
EPN24-SLBP	ATGCACGGTCTGCAGGACGACCCGGACCTGCAAGCACTGCTCAAGGGCAGCCAGCTGCTGAAAGTTAAATCTTCTTCTTGGCGTCGTGAACGTTTCTACAAACTCCAGGAGGACTGCAAAACCATCTGGCAGGAATCCCGTAAAGTTATGCGTTCTCCGGAATCTCAGCTGTTCTCTATCGAAGACATCCAGGAAGTTCGTATGGGTCACCGTACCGAAGGTCTGGAAAAATTCGCGCGTGACATCCCGGAAGACCGTTGCTTCTCCATCGTTTTCAAAGACCAGCGTAACACCCTGGACCTGATCGCGCCGTCTCCGGCGGACGCGCAGCACTGGGTTCAGGGTCTGCGTAAAATCATCCACCACTCTGGTTCTATGGACCAACGTCAGAAACTGCAG…
EPN24-IGF2BP1	ATGCACGGTCTGCAGGACGACCCGGACCTGCAAGCACTGCTCAAGGGCAGCCAGCTGCTGAAAGTTAAATCTTCTTCTTGGCGTCGTGAACGTTTCTACAAACTCCAGGAGGACTGCAAAACCATCTGGCAGGAATCCCGTAAAGTTATGCGTTCTCCGGAATCTCAGCTGTTCTCTATCGAAGACATCCAGGAAGTTCGTATGGGTCACCGTACCGAAGGTCTGGAAAAATTCGCGCGTGACATCCCGGAAGACCGTTGCTTCTCCATCGTTTTCAAAGACCAGCGTAACACCCTGGACCTGATCGCGCCGTCTCCGGCGGACGCGCAGCACTGGGTTCAGGGTCTGCGTAAAATCATCCACCACTCTGGTTCTATGGACCAACGTCAGAAACTGCAG…
EPN24-IGF2BP1-∆KH1-2	ATGCACGGTCTGCAGGACGACCCGGACCTGCAAGCACTGCTCAAGGGCAGCCAGCTGCTGAAAGTTAAATCTTCTTCTTGGCGTCGTGAACGTTTCTACAAACTCCAGGAGGACTGCAAAACCATCTGGCAGGAATCCCGTAAAGTTATGCGTTCTCCGGAATCTCAGCTGTTCTCTATCGAAGACATCCAGGAAGTTCGTATGGGTCACCGTACCGAAGGTCTGGAAAAATTCGCGCGTGACATCCCGGAAGACCGTTGCTTCTCCATCGTTTTCAAAGACCAGCGTAACACCCTGGACCTGATCGCGCCGTCTCCGGCGGACGCGCAGCACTGGGTTCAGGGTCTGCGTAAAATCATCCACCACTCTGGTTCTATGGACCAACGTCAGAAACTGCAG…
EPN24-IGF2BP1-∆KH3-4	ATGCACGGTCTGCAGGACGACCCGGACCTGCAAGCACTGCTCAAGGGCAGCCAGCTGCTGAAAGTTAAATCTTCTTCTTGGCGTCGTGAACGTTTCTACAAACTCCAGGAGGACTGCAAAACCATCTGGCAGGAATCCCGTAAAGTTATGCGTTCTCCGGAATCTCAGCTGTTCTCTATCGAAGACATCCAGGAAGTTCGTATGGGTCACCGTACCGAAGGTCTGGAAAAATTCGCGCGTGACATCCCGGAAGACCGTTGCTTCTCCATCGTTTTCAAAGACCAGCGTAACACCCTGGACCTGATCGCGCCGTCTCCGGCGGACGCGCAGCACTGGGTTCAGGGTCTGCGTAAAATCATCCACCACTCTGGTTCTATGGACCAACGTCAGAAACTGCAG…
EPN24-FMR1	ATGCACGGTCTGCAGGACGACCCGGACCTGCAAGCACTGCTCAAGGGCAGCCAGCTGCTGAAAGTTAAATCTTCTTCTTGGCGTCGTGAACGTTTCTACAAACTCCAGGAGGACTGCAAAACCATCTGGCAGGAATCCCGTAAAGTTATGCGTTCTCCGGAATCTCAGCTGTTCTCTATCGAAGACATCCAGGAAGTTCGTATGGGTCACCGTACCGAAGGTCTGGAAAAATTCGCGCGTGACATCCCGGAAGACCGTTGCTTCTCCATCGTTTTCAAAGACCAGCGTAACACCCTGGACCTGATCGCGCCGTCTCCGGCGGACGCGCAGCACTGGGTTCAGGGTCTGCGTAAAATCATCCACCACTCTGGTTCTATGGACCAACGTCAGAAACTGCAG…
EPN24-TIA1	ATGCACGGTCTGCAGGACGACCCGGACCTGCAAGCACTGCTCAAGGGCAGCCAGCTGCTGAAAGTTAAATCTTCTTCTTGGCGTCGTGAACGTTTCTACAAACTCCAGGAGGACTGCAAAACCATCTGGCAGGAATCCCGTAAAGTTATGCGTTCTCCGGAATCTCAGCTGTTCTCTATCGAAGACATCCAGGAAGTTCGTATGGGTCACCGTACCGAAGGTCTGGAAAAATTCGCGCGTGACATCCCGGAAGACCGTTGCTTCTCCATCGTTTTCAAAGACCAGCGTAACACCCTGGACCTGATCGCGCCGTCTCCGGCGGACGCGCAGCACTGGGTTCAGGGTCTGCGTAAAATCATCCACCACTCTGGTTCTATGGACCAACGTCAGAAACTGCAG…
EPN24-YTHDF2	ATGCACGGTCTGCAGGACGACCCGGACCTGCAAGCACTGCTCAAGGGCAGCCAGCTGCTGAAAGTTAAATCTTCTTCTTGGCGTCGTGAACGTTTCTACAAACTCCAGGAGGACTGCAAAACCATCTGGCAGGAATCCCGTAAAGTTATGCGTTCTCCGGAATCTCAGCTGTTCTCTATCGAAGACATCCAGGAAGTTCGTATGGGTCACCGTACCGAAGGTCTGGAAAAATTCGCGCGTGACATCCCGGAAGACCGTTGCTTCTCCATCGTTTTCAAAGACCAGCGTAACACCCTGGACCTGATCGCGCCGTCTCCGGCGGACGCGCAGCACTGGGTTCAGGGTCTGCGTAAAATCATCCACCACTCTGGTTCTATGGACCAACGTCAGAAACTGCAG…
EPN24-YTHDF2 K416A	ATGCACGGTCTGCAGGACGACCCGGACCTGCAAGCACTGCTCAAGGGCAGCCAGCTGCTGAAAGTTAAATCTTCTTCTTGGCGTCGTGAACGTTTCTACAAACTCCAGGAGGACTGCAAAACCATCTGGCAGGAATCCCGTAAAGTTATGCGTTCTCCGGAATCTCAGCTGTTCTCTATCGAAGACATCCAGGAAGTTCGTATGGGTCACCGTACCGAAGGTCTGGAAAAATTCGCGCGTGACATCCCGGAAGACCGTTGCTTCTCCATCGTTTTCAAAGACCAGCGTAACACCCTGGACCTGATCGCGCCGTCTCCGGCGGACGCGCAGCACTGGGTTCAGGGTCTGCGTAAAATCATCCACCACTCTGGTTCTATGGACCAACGTCAGAAACTGCAG…
EPN24-YTHDF2 R527A	ATGCACGGTCTGCAGGACGACCCGGACCTGCAAGCACTGCTCAAGGGCAGCCAGCTGCTGAAAGTTAAATCTTCTTCTTGGCGTCGTGAACGTTTCTACAAACTCCAGGAGGACTGCAAAACCATCTGGCAGGAATCCCGTAAAGTTATGCGTTCTCCGGAATCTCAGCTGTTCTCTATCGAAGACATCCAGGAAGTTCGTATGGGTCACCGTACCGAAGGTCTGGAAAAATTCGCGCGTGACATCCCGGAAGACCGTTGCTTCTCCATCGTTTTCAAAGACCAGCGTAACACCCTGGACCTGATCGCGCCGTCTCCGGCGGACGCGCAGCACTGGGTTCAGGGTCTGCGTAAAATCATCCACCACTCTGGTTCTATGGACCAACGTCAGAAACTGCAG…
EPN24-G3BP1	ATGCACGGTCTGCAGGACGACCCGGACCTGCAAGCACTGCTCAAGGGCAGCCAGCTGCTGAAAGTTAAATCTTCTTCTTGGCGTCGTGAACGTTTCTACAAACTCCAGGAGGACTGCAAAACCATCTGGCAGGAATCCCGTAAAGTTATGCGTTCTCCGGAATCTCAGCTGTTCTCTATCGAAGACATCCAGGAAGTTCGTATGGGTCACCGTACCGAAGGTCTGGAAAAATTCGCGCGTGACATCCCGGAAGACCGTTGCTTCTCCATCGTTTTCAAAGACCAGCGTAACACCCTGGACCTGATCGCGCCGTCTCCGGCGGACGCGCAGCACTGGGTTCAGGGTCTGCGTAAAATCATCCACCACTCTGGTTCTATGGACCAACGTCAGAAACTGCAG…
EPN24-PUM2	ATGCACGGTCTGCAGGACGACCCGGACCTGCAAGCACTGCTCAAGGGCAGCCAGCTGCTGAAAGTTAAATCTTCTTCTTGGCGTCGTGAACGTTTCTACAAACTCCAGGAGGACTGCAAAACCATCTGGCAGGAATCCCGTAAAGTTATGCGTTCTCCGGAATCTCAGCTGTTCTCTATCGAAGACATCCAGGAAGTTCGTATGGGTCACCGTACCGAAGGTCTGGAAAAATTCGCGCGTGACATCCCGGAAGACCGTTGCTTCTCCATCGTTTTCAAAGACCAGCGTAACACCCTGGACCTGATCGCGCCGTCTCCGGCGGACGCGCAGCACTGGGTTCAGGGTCTGCGTAAAATCATCCACCACTCTGGTTCTATGGACCAACGTCAGAAACTGCAG…
EPN24-mLIN28A	ATGCACGGTCTGCAGGACGACCCGGACCTGCAAGCACTGCTCAAGGGCAGCCAGCTGCTGAAAGTTAAATCTTCTTCTTGGCGTCGTGAACGTTTCTACAAACTCCAGGAGGACTGCAAAACCATCTGGCAGGAATCCCGTAAAGTTATGCGTTCTCCGGAATCTCAGCTGTTCTCTATCGAAGACATCCAGGAAGTTCGTATGGGTCACCGTACCGAAGGTCTGGAAAAATTCGCGCGTGACATCCCGGAAGACCGTTGCTTCTCCATCGTTTTCAAAGACCAGCGTAACACCCTGGACCTGATCGCGCCGTCTCCGGCGGACGCGCAGCACTGGGTTCAGGGTCTGCGTAAAATCATCCACCACTCTGGTTCTATGGACCAACGTCAGAAACTGCAG…
EPN24-hLIN28A	ATGCACGGTCTGCAGGACGACCCGGACCTGCAAGCACTGCTCAAGGGCAGCCAGCTGCTGAAAGTTAAATCTTCTTCTTGGCGTCGTGAACGTTTCTACAAACTCCAGGAGGACTGCAAAACCATCTGGCAGGAATCCCGTAAAGTTATGCGTTCTCCGGAATCTCAGCTGTTCTCTATCGAAGACATCCAGGAAGTTCGTATGGGTCACCGTACCGAAGGTCTGGAAAAATTCGCGCGTGACATCCCGGAAGACCGTTGCTTCTCCATCGTTTTCAAAGACCAGCGTAACACCCTGGACCTGATCGCGCCGTCTCCGGCGGACGCGCAGCACTGGGTTCAGGGTCTGCGTAAAATCATCCACCACTCTGGTTCTATGGACCAACGTCAGAAACTGCAG…
EPN24-PABPC1	ATGCACGGTCTGCAGGACGACCCGGACCTGCAAGCACTGCTCAAGGGCAGCCAGCTGCTGAAAGTTAAATCTTCTTCTTGGCGTCGTGAACGTTTCTACAAACTCCAGGAGGACTGCAAAACCATCTGGCAGGAATCCCGTAAAGTTATGCGTTCTCCGGAATCTCAGCTGTTCTCTATCGAAGACATCCAGGAAGTTCGTATGGGTCACCGTACCGAAGGTCTGGAAAAATTCGCGCGTGACATCCCGGAAGACCGTTGCTTCTCCATCGTTTTCAAAGACCAGCGTAACACCCTGGACCTGATCGCGCCGTCTCCGGCGGACGCGCAGCACTGGGTTCAGGGTCTGCGTAAAATCATCCACCACTCTGGTTCTATGGACCAACGTCAGAAACTGCAG…
EPN24-ORF5	ATGCACGGTCTGCAGGACGACCCGGACCTGCAAGCACTGCTCAAGGGCAGCCAGCTGCTGAAAGTTAAATCTTCTTCTTGGCGTCGTGAACGTTTCTACAAACTCCAGGAGGACTGCAAAACCATCTGGCAGGAATCCCGTAAAGTTATGCGTTCTCCGGAATCTCAGCTGTTCTCTATCGAAGACATCCAGGAAGTTCGTATGGGTCACCGTACCGAAGGTCTGGAAAAATTCGCGCGTGACATCCCGGAAGACCGTTGCTTCTCCATCGTTTTCAAAGACCAGCGTAACACCCTGGACCTGATCGCGCCGTCTCCGGCGGACGCGCAGCACTGGGTTCAGGGTCTGCGTAAAATCATCCACCACTCTGGTTCTATGGACCAACGTCAGAAACTGCAG…
EPN24-hBD3	ATGCACGGTCTGCAGGACGACCCGGACCTGCAAGCACTGCTCAAGGGCAGCCAGCTGCTGAAAGTTAAATCTTCTTCTTGGCGTCGTGAACGTTTCTACAAACTCCAGGAGGACTGCAAAACCATCTGGCAGGAATCCCGTAAAGTTATGCGTTCTCCGGAATCTCAGCTGTTCTCTATCGAAGACATCCAGGAAGTTCGTATGGGTCACCGTACCGAAGGTCTGGAAAAATTCGCGCGTGACATCCCGGAAGACCGTTGCTTCTCCATCGTTTTCAAAGACCAGCGTAACACCCTGGACCTGATCGCGCCGTCTCCGGCGGACGCGCAGCACTGGGTTCAGGGTCTGCGTAAAATCATCCACCACTCTGGTTCTATGGACCAACGTCAGAAACTGCAG…

## Sheet: S1-2
Annotation of FMR1 mutations, related to Fig.4.
Variation	Protein Change	Classification, Review status	Variation Accession	Submitter Accession
NM_002024.6(FMR1):c.66T>A (p.Asp22Glu)	D22E	Uncertain significance	VCV001723506.2	SCV002600964.2
NM_002024.6(FMR1):c.71A>G (p.His24Arg)	H24R	Uncertain significance	VCV001304008.2	SCV001985901.2
NM_002024.6(FMR1):c.73G>A (p.Glu25Lys)	E25K	Uncertain significance	VCV003362155.1	SCV005369768.1
NM_002024.6(FMR1):c.80C>A (p.Ser27Ter)	S27*	Pathogenic	VCV000029987.1	SCV000044171.3
NM_002024.6(FMR1):c.82A>T (p.Ile28Leu)	I28L	Uncertain significance	VCV003368324.1	SCV005384548.1
NM_002024.6(FMR1):c.101A>G (p.Asn34Ser)	N34S	Uncertain significance	VCV001308996.2	SCV001996523.2
NM_002024.6(FMR1):c.188A>G (p.Asp63Gly)	D63G	Uncertain significance	VCV001699508.2	SCV002558066.2
NM_002024.6(FMR1):c.272T>C (p.Phe91Ser)	F91S	Uncertain significance	VCV001326069.2	SCV002027964.2
NM_002024.6(FMR1):c.300T>G (p.Asp100Glu)	D100E	Likely benign	VCV002663123.1	SCV004169816.1
NM_002024.6(FMR1):c.304A>G (p.Thr102Ala)	T102A	Uncertain significance	VCV001208703.3	SCV001804448.1
NM_002024.6(FMR1):c.309C>T (p.Tyr103=)	synonymous	Benign/Likely benign	VCV002571382.14	SCV004010966.13
NM_002024.6(FMR1):c.357A>C (p.Lys119Asn)	K119N	Likely benign	VCV000804091.1	SCV001142030.1
NM_002024.6(FMR1):c.358C>A (p.Pro120Thr)	P120T	Uncertain significance	VCV002573912.1	SCV004021798.1
NM_002024.6(FMR1):c.373del (p.Thr125fs)	T125fs	Pathogenic	VCV000009970.1	SCV000030875.4
NM_002024.6(FMR1):c.374C>T (p.Thr125Ile)	T125I	Uncertain significance	VCV000211028.6	SCV000247408.1
NM_002024.6(FMR1):c.380A>G (p.His127Arg)	H127R	Uncertain significance	VCV001735127.2	SCV002622380.2
NM_002024.6(FMR1):c.406G>C (p.Asp136His)	D136H	Uncertain significance	VCV003367446.1	SCV005384352.1
NM_002024.6(FMR1):c.413G>A (p.Arg138Gln)	R138Q	Pathogenic	VCV001701686.1	SCV002564254.1
NM_002024.6(FMR1):c.414G>A (p.Arg138=)	synonymous	Benign/Likely benign	VCV000094023.17	SCV000111857.8
NM_002024.6(FMR1):c.433G>T (p.Ala145Ser)	A145S	Benign	VCV000129104.15	SCV000854783.1
NM_002024.6(FMR1):c.434C>T (p.Ala145Val)	A145V	Uncertain significance	VCV001739923.2	SCV002631061.2
NM_002024.6(FMR1):c.440A>G (p.His147Arg)	H147R	Uncertain significance	VCV000094024.5	SCV000111858.8
NM_002024.6(FMR1):c.479C>T (p.Thr160Ile)	T160I	Likely benign	VCV000975230.1	SCV001427496.1
NM_002024.6(FMR1):c.508A>C (p.Ile170Leu)	I170L	Likely benign	VCV002463538.2	SCV003879237.2
NM_002024.6(FMR1):c.522T>A (p.Asn174Lys)	N174K	Likely benign	VCV000211029.6	SCV000247409.1
NM_002024.6(FMR1):c.545A>G (p.His182Arg)	H182R	Uncertain significance	VCV002574375.1	SCV004022869.1
NM_002024.6(FMR1):c.554T>C (p.Ile185Thr)	I185T	Uncertain significance	VCV000451618.2	SCV000620341.2
NM_002024.6(FMR1):c.578G>A (p.Arg193His)	R193H	Uncertain significance	VCV002628570.1	SCV004105967.1
NM_002024.6(FMR1):c.602G>C (p.Arg201Thr)	R201T	Uncertain significance	VCV000521330.3	SCV000741854.3
NM_002024.6(FMR1):c.608AAG[1] (p.Glu204del)	E204del	Uncertain significance	VCV000984548.1	SCV001442910.1
NM_002024.6(FMR1):c.651G>A (p.Ser217=)	synonymous	Benign/Likely benign	VCV000589719.16	SCV000850793.5
NM_002024.6(FMR1):c.663del (p.Glu221fs)	E221fs	Pathogenic	VCV001801490.1	SCV002605536.1
NM_002024.6(FMR1):c.673G>A (p.Val225Ile)	V225I	Likely pathogenic	VCV001801484.1	SCV002605541.1
NM_002024.6(FMR1):c.737A>G (p.Lys246Arg)	K246R	Uncertain significance	VCV001758600.2	SCV002675041.2
NM_002024.6(FMR1):c.743C>T (p.Pro248Leu)	P248L	Uncertain significance	VCV003343126.1	SCV005333956.1
NM_002024.6(FMR1):c.786T>G (p.Phe262Leu)	F262L	Uncertain significance	VCV001676786.1	SCV002499675.1
NM_002024.6(FMR1):c.795T>C (p.Tyr265=)	synonymous	Benign/Likely benign	VCV002661592.11	SCV004166176.11
NM_002024.6(FMR1):c.797G>A (p.Gly266Glu)	G266E	Pathogenic	VCV000590253.5	SCV000851977.5
NM_002024.6(FMR1):c.818A>G (p.Lys273Arg)	K273R	Benign/Likely benign	VCV000444826.35	SCV001366148.2
NM_002024.6(FMR1):c.838G>A (p.Glu280Lys)	E280K	Uncertain significance	VCV003242045.1	SCV005060994.1
NM_002024.6(FMR1):c.866C>T (p.Pro289Leu)	P289L	Likely pathogenic	VCV001098346.1	SCV001622661.1
NM_002024.6(FMR1):c.911T>A (p.Ile304Asn)	I304N	Pathogenic	VCV000009969.1	SCV000030874.3
NM_002024.6(FMR1):c.930G>A (p.Lys310=)	synonymous	Benign/Likely benign	VCV002661593.11	SCV004166177.11
NM_002024.6(FMR1):c.967G>C (p.Glu323Gln)	E323Q	Uncertain significance	VCV002273924.2	SCV003600883.2
NM_002024.6(FMR1):c.1013T>C (p.Leu338Pro)	L338P	Uncertain significance	VCV002481294.2	SCV003896000.2
NM_002024.6(FMR1):c.1022A>G (p.Asn341Ser)	N341S	Likely benign	VCV001763358.2	SCV002678372.2
NM_002024.6(FMR1):c.1032G>C (p.Arg344Ser)	R344S	Uncertain significance	VCV002633326.1	SCV004104509.1
NM_002024.6(FMR1):c.1034T>C (p.Val345Ala)	V345A	Likely benign	VCV003250814.5	SCV005075672.5
NM_002024.6(FMR1):c.1037G>A (p.Gly346Glu)	G346E	Uncertain significance	VCV001695614.2	SCV002546891.2
NM_002024.6(FMR1):c.1055A>G (p.Glu352Gly)	E352G	Uncertain significance	VCV001305423.2	SCV001992432.2
NM_002024.6(FMR1):c.1109G>A (p.Ser370Asn)	S370N	Uncertain significance	VCV002506275.1	SCV003934813.1
NM_002024.6(FMR1):c.1124G>T (p.Arg375Met)	R375M	Uncertain significance	VCV002541369.2	SCV003971743.2
NM_002024.6(FMR1):c.1184G>A (p.Trp395Ter)	W395*	Likely pathogenic	VCV001027987.1	SCV001520153.1
NM_002024.6(FMR1):c.1189G>A (p.Gly397Ser)	G397S	Uncertain significance	VCV001744341.3	SCV002756987.1
NM_002024.6(FMR1):c.1223A>G (p.Asp408Gly)	D408G	Uncertain significance	VCV001753571.2	SCV002656792.2
NM_002024.6(FMR1):c.1231G>A (p.Ala411Thr)	A411T	Likely benign	VCV003030246.2	SCV004715582.2
NM_002024.6(FMR1):c.1256A>G (p.Tyr419Cys)	Y419C	Likely pathogenic	VCV000372871.1	SCV000491404.1
NM_002024.6(FMR1):c.1268_1269del (p.Tyr423fs)	Y423fs	Likely pathogenic	VCV001708227.1	SCV002577695.1
NM_002024.6(FMR1):c.1282G>C (p.Asp428His)	D428H	Uncertain significance	VCV001027988.1	SCV001520154.1
NM_002024.6(FMR1):c.1325G>A (p.Arg442Gln)	R442Q	Likely pathogenic	VCV001802576.3	SCV002760087.1
NM_002024.6(FMR1):c.1332T>A (p.Ile444=)	synonymous	Benign/Likely benign	VCV000450797.3	SCV000619416.3
NM_002024.6(FMR1):c.1371G>A (p.Lys457=)	synonymous	Benign/Likely benign	VCV000771946.3	SCV001097758.1
NM_002024.6(FMR1):c.1375A>T (p.Lys459Ter)	K459*	Pathogenic	VCV003255145.1	SCV005086502.1
NM_002024.6(FMR1):c.1382A>G (p.Tyr461Cys)	T461C	Uncertain significance	VCV003366032.1	SCV005380180.1
NM_002024.6(FMR1):c.1408G>A (p.Gly470Ser)	G470S	Uncertain significance	VCV001184116.1	SCV001760735.1
NM_002024.6(FMR1):c.1411C>T (p.Arg471Ter)	R471*	Pathogenic	VCV003336885.1	SCV005196681.1
NM_002024.6(FMR1):c.1439G>A (p.Gly480Glu)	G480E	Uncertain significance	VCV002662825.1	SCV004167967.1
NM_002024.6(FMR1):c.1450C>T (p.Arg484Cys)	R484C	Uncertain significance	VCV003368021.1	SCV005382935.1
NM_002024.6(FMR1):c.1463A>G (p.Tyr488Cys)	Y488C	Uncertain significance	VCV001308829.2	SCV001996294.2
NM_002024.6(FMR1):c.1572C>T (p.Ser524=)	synonymous	Benign/Likely benign	VCV000211027.17	SCV000247407.1
NM_002024.6(FMR1):c.1576C>A (p.Leu526Met)	L526M	Uncertain significance	VCV002614129.2	SCV004083335.2
NM_002024.6(FMR1):c.1579C>A (p.Arg527Ser)	R527S	Uncertain significance	VCV003257367.4	SCV005092750.4
NM_002024.6(FMR1):c.1580G>A (p.Arg527His)	R527H	Uncertain significance	VCV000521313.2	SCV000741829.2
NM_002024.6(FMR1):c.1622_1636del (p.Gln541_Gly545del)	Deletion	Likely pathogenic	VCV001801489.1	SCV002605535.1
NM_002024.6(FMR1):c.1636C>T (p.Arg546Cys)	R546C	Uncertain significance	VCV003369960.1	SCV005387440.1
NM_002024.6(FMR1):c.1641A>G (p.Gly547=)	synonymous	Likely benign	VCV001777042.2	SCV002709355.2
NM_002024.6(FMR1):c.1652A>G (p.Lys551Arg)	K551R	Uncertain significance	VCV001777275.2	SCV002703488.2
NM_002024.6(FMR1):c.1663G>A (p.Asp555Asn)	D555N	Uncertain significance	VCV000589641.4	SCV000850648.4
NM_002024.6(FMR1):c.1691G>A (p.Arg564His)	R564H	Uncertain significance	VCV002580155.1	SCV004035272.1
NM_002024.6(FMR1):c.1726G>A (p.Gly576Arg)	G576R	Uncertain significance	VCV000452357.2	SCV000621161.1
NM_002024.6(FMR1):c.1751G>A (p.Cys584Tyr)	C584Y	Uncertain significance	VCV000129106.6	SCV000151233.1
NM_002024.6(FMR1):c.1816C>T (p.Arg606Cys)	R606C	Uncertain significance	VCV002441534.2	SCV003833630.2
NM_002024.6(FMR1):c.1820C>T (p.Thr607Met)	T607M	Likely benign	VCV001780757.2	SCV002713101.2
NM_002024.6(FMR1):c.1829A>G (p.Asp610Gly)	D610G	Uncertain significance	VCV003366061.1	SCV005380217.1
NM_002024.6(FMR1):c.1831C>T (p.Arg611Cys)	R611C	Uncertain significance	VCV001698834.2	SCV002556715.2
NM_002024.6(FMR1):c.1832G>T (p.Arg611Leu)	R611L	Uncertain significance	VCV002441532.2	SCV003833628.2
NM_002024.6(FMR1):c.1857C>T (p.Asp619=)	synonymous	Benign/Likely benign	VCV000094021.10	SCV000111855.8

## Sheet: S1-3
Sequence of PCR primers for constructs, related to Figs.1-4.
EPN24-F	cacaagtttgtacattcgaaggatccGCCACCATGCACGGTCTGCAGGACG
EPN24-R for EPN24	AACTAGAAGGCACAGTCGAGGCTAGCTTACAGGTCTTCTTCGGAGATCAGCTTC
EPN24-R for EPN24-RBP fusion	CAGGTCTTCTTCGGAGATCAGCTTC
HIVgag-F	cacaagtttgtacattcgaaggatccCACCATGGGCGCCCGCGCCAGC
HIVgag-R	TTGTGACGAGGGGTCGCTGC
HIVgag-ZIP-F	cacaagtttgtacattcgaaggatccGCCACCATGGGTGCGAGAG
HIVgag-ZIP-R	TTGTGACGAGGGGTCGTTGCC
mPEG10-F	cacaagtttgtacattcgaaggatccGCCACCATGGCTGCTGCGGGTGGTTC
mPEG10-R	CAGCGGGGCCGGGGAGTTTC
hPEG10-F	cacaagtttgtacattcgaaggatccGCCACCATGCTGGGTCCCGACTGCC
hPEG10-R	CAGCGGGGCCGGGGAGTTTCC
GFP-F for EPN24 fusion	GAAGCTGATCTCCGAAGAAGACCTGgtgagcaagggcgaggagc
GFP-F for HIVgag fusion	GCAGCGACCCCTCGTCACAAgtgagcaagggcgaggagc
GFP-F for HIVgagZIP fusion	GGCAACGACCCCTCGTCACAAgtgagcaagggcgaggagc
GFP-F for mPEG10 fusion	GAAACTCCCCGGCCCCGCTGgtgagcaagggcgaggagc
GFP-F for hPEG10 fusion	GGAAACTCCCCGGCCCCGCTGgtgagcaagggcgaggagc
GFP-R	AACTAGAAGGCACAGTCGAGGCTAGCTTACTTGTACAGCTCGTCCATGCCGAG
SLBP-F for EPN24 fusion	GAAGCTGATCTCCGAAGAAGACCTGgcctgccgcccgcgaagc
SLBP-F for HIVgag fusion	GCAGCGACCCCTCGTCACAAgcctgccgcccgcgaagc
SLBP-F for HIVgagZIP fusion	GGCAACGACCCCTCGTCACAAgcctgccgcccgcgaagc
SLBP-F for mPEG10 fusion	GAAACTCCCCGGCCCCGCTGgcctgccgcccgcgaagc
SLBP-F for hPEG10 fusion	GGAAACTCCCCGGCCCCGCTGgcctgccgcccgcgaagc
SLBP-R	AACTAGAAGGCACAGTCGAGGCTAGCTTAGCTCATGGCTGAGAAGTCTCTC
IGF2BP1-F	GAAGCTGATCTCCGAAGAAGACCTGaacaagctttacatcggcaacctc
IGF2BP1-R	AACTAGAAGGCACAGTCGAGGCTAGCTCACTTCCTCCGTGCCTGGG
FMR1-F	GAAGCTGATCTCCGAAGAAGACCTGGGCGGAGGAGGCAGCGGCGGAGGAGGCAGCGAGGAGCTGGTGGTGGAAGTG
FMR1-R	AACTAGAAGGCACAGTCGAGGCTAGCTTAGGGTACTCCATTCACGAGTGG
TIA1-F	GAAGCTGATCTCCGAAGAAGACCTGGAGGACGAGATGCCCAAGACTC
TIA1-R	AACTAGAAGGCACAGTCGAGGCTAGCTCACTGGGTTTCATACCCTGCCAC
YTHDF2-F	GAAGCTGATCTCCGAAGAAGACCTGTCGGCCAGCAGCCTCTTGG
YTHDF2-R	AACTAGAAGGCACAGTCGAGGCTAGCTTATTTCCCACGACCTTGACGTTC
YTHDF2-K416A-MF	GGTTTTCATCATTGCCAGCTACTCTGAGGACGATATTCACC
YTHDF2-K416A-MR	GTCCTCAGAGTAGCTGGCAATGATGAAAACC
YTHDF2-R527A-MF	CAGTGACCAACTCTGCCGACACTCAGGAAGTGC
YTHDF2-R527A-MR	GCACTTCCTGAGTGTCGGCAGAGTTGGTCACTG
G3BP1-F	GAAGCTGATCTCCGAAGAAGACCTGgtgatggagaagcctagtcccctgc
G3BP1-R	AACTAGAAGGCACAGTCGAGGCTAGCTCACTGCCGTGGCGCAAGCC
PUM2-F	GAAGCTGATCTCCGAAGAAGACCTGaatcatgattttcaagctcttgcattag
PUM2-R	AACTAGAAGGCACAGTCGAGGCTAGCTTACAGCATTCCATTTGGTGGTCC
EPN24-F‘ for Dox inducible EPN24-RBPs	acttcctaccctcgtaaaggaagcttGCCACCATGCACGGTCTGCAGGACG
EPN24-R’ for Dox inducible EPN24-RBPs	TCTTTGTAGTCGTCGACACCGGATCC CAGGTCTTCTTCGGAGATCAGCTTC
mLIN28A-F	GAAGCTGATCTCCGAAGAAGACCTGggctcggtgtccaaccagc
mLIN28A-R	TCTTTGTAGTCGTCGACACCGGATCCTCAATTCTGGGCTTCTGGGAGC
hLIN28A-F	GAAGCTGATCTCCGAAGAAGACCTGGGCTCCGTGTCCAACCAGCAGTT
hLIN28A-R	TCTTTGTAGTCGTCGACACCGGATCCTCAATTCTGTGCCTCCGGGAGC
PABPC1-F	GAAGCTGATCTCCGAAGAAGACCTGAACCCCAGTGCCCCCAGCTAC
PABPC1-R	AACTAGAAGGCACAGTCGAGGCTAGCTTAAACAGTTGGAACACCGGTGG
PABPC1-R‘ for Dox inducible EPN24-PABPC1	TCTTTGTAGTCGTCGACACCGGATCCTTAAACAGTTGGAACACCGGTGG
ORF5-F	GAAGCTGATCTCCGAAGAAGACCTGGACGACCCCAGCTTCCTGAC
ORF5-R	AACTAGAAGGCACAGTCGAGGCTAGCTTACTCCTCGTCGTCGCTGGTCTC
hBD3-F	GAAGCTGATCTCCGAAGAAGACCTGGGAATCATAAACACATTACAGAAATATTATTG
hBD3-R	AACTAGAAGGCACAGTCGAGGCTAGCTTATTTCTTTCTTCGGCAGCATTTTC
PCR primers for constructing EPN24-FMR1 mutants
D22E-MF	GGCATTTGTAAAGGAAGTTCATGAAGATTCAAT
D22E-MR	ATTGAATCTTCATGAACTTCCTTTACAAATGCC
H24R-MF	CATTTGTAAAGGATGTTCGTGAAGATTCAATAACAG
H24R-MR	CTGTTATTGAATCTTCACGAACATCCTTTACAAATG
E25K-MF	GTAAAGGATGTTCATAAAGATTCAATAACAGTTG
E25K-MR	CAACTGTTATTGAATCTTTATGAACATCCTTTAC
S27*-MF	GATGTTCATGAAGATTAAATAACAGTTGCATTTG
S27*-MR	CAAATGCAACTGTTATTTAATCTTCATGAACATC
I28L-MF	GTTCATGAAGATTCATTAACAGTTGCATTTGAA
I28L-MR	TTCAAATGCAACTGTTAATGAATCTTCATGAAC
N34S-MF	GTTGCATTTGAAAGCAACTGGCAGCC
N34S-MR	GGCTGCCAGTTGCTTTCAAATGCAAC
D63G-MF	GATATAAATGAAAGTGGTGAAGTTGAGGTGTATTCCAG
D63G-MR	CTGGAATACACCTCAACTTCACCACTTTCATTTATATC
F91S-MF	GATGATAAAGGGTGAGTCTTATGTGATAGAATATGC
F91S-MR	GCATATTCTATCACATAAGACTCACCCTTTATCATC
D100E-MF	ATATGCAGCATGTGAGGCAACTTACAATGAAATT
D100E-MR	AATTTCATTGTAAGTTGCCTCACATGCTGCATAT
T102A-MF	CAGCATGTGATGCAGCTTACAATGAAATTG
T102A-MR	CAATTTCATTGTAAGCTGCATCACATGCTG
K119N-MF	CTGTTAATCCCAACAACCCTGCCACAAAAGAT
K119N-MR	ATCTTTTGTGGCAGGGTTGTTGGGATTAACAG
P120T-MF	GTTAATCCCAACAAAACTGCCACAAAAGATAC
P120T-MR	GTATCTTTTGTGGCAGTTTTGTTGGGATTAAC
T125fs-MF	CAAACCTGCCACAAAAGATCTTTCCATAAGATCAAG
T125fs-MR	CTTGATCTTATGGAAAGATCTTTTGTGGCAGGTTTG
T125I-MF	CTGCCACAAAAGATATTTTCCATAAGATCAAG
T125I-MR	CTTGATCTTATGGAAAATATCTTTTGTGGCAG
H127R-MF	CACAAAAGATACTTTCCGTAAGATCAAGCTGGATG
H127R-MR	CATCCAGCTTGATCTTACGGAAAGTATCTTTTGTG
D136H-MF	GGATGTGCCAGAACACTTACGGCAAATGT
D136H-MR	ACATTTGCCGTAAGTGTTCTGGCACATCC
R138Q-MF	CCAGAAGACTTACAGCAAATGTGTGCC
R138Q-MR	GGCACACATTTGCTGTAAGTCTTCTGG
A145S-MF	GTGTGCCAAAGAGTCGGCACATAAGGAT
A145S-MR	ATCCTTATGTGCCGACTCTTTGGCACAC
A145V-MF	GTGCCAAAGAGGTGGCACATAAGGATT
A145V-MR	AATCCTTATGTGCCACCTCTTTGGCAC
H147R-MF	CAAAGAGGCGGCACGTAAGGATTTTAAAAAG
H147R-MR	CTTTTTAAAATCCTTACGTGCCGCCTCTTTG
T160I-MF	GGTGCCTTTTCTGTAATTTATGATCCAGAAAATT
T160I-MR	AATTTTCTGGATCATAAATTACAGAAAAGGCACC
I170L-MF	TTATCAGCTTGTCCTTTTGTCCATCAATGAAG
I170L-MR	CTTCATTGATGGACAAAAGGACAAGCTGATAA
N174K-MF	CATTTTGTCCATCAAAGAAGTCACCTCAAAG
N174K-MF	CTTTGAGGTGACTTCTTTGATGGACAAAATG
H182R-MF	CAAAGCGAGCACGTATGCTGATTGACAT
H182R-MR	ATGTCAATCAGCATACGTGCTCGCTTTG
I185T-MF	GCACATATGCTGACTGACATGCACTTTC
I185T-MR	GAAAGTGCATGTCAGTCAGCATATGTGC
R193H-MF	TCGGAGTCTGCACACTAAGTTGTCTCT
R193H-MR	AGAGACAACTTAGTGTGCAGACTCCGA
R201T-MF	GTTGTCTCTGATAATGACAAATGAAGAAGCTAGTAAGC
R201T-MR	GCTTACTAGCTTCTTCATTTGTCATTATCAGAGACAAC
E204del-MF	CTAAGTTGTCTCTGATAATGAGAAATGAAGCTAGTAAGCAGCTGGAGAG
E204del-MR	CTCTCCAGCTGCTTACTAGCTTCATTTCTCATTATCAGAGACAACTTAG
E221fs-MF	GCCTCGAGATTTCATGACAGTTTATCGTAAGAG
E221fs-MR	CTCTTACGATAAACTGTCATGAAATCTCGAGGC
V225I-MF	TTTCATGAACAGTTTATCATAAGAGAAGATCTGATG
V225I-MR	CATCAGATCTTCTCTTATGATAAACTGTTCATGAAA
K246R-MF	TATTCAGCAAGCTAGAAGAGTACCTGGGGTCAC
K246R-MR	GTGACCCCAGGTACTCTTCTAGCTTGCTGAATA
P248L-MF	CAAGCTAGAAAAGTACTTGGGGTCACTGCTATT
P248L-MR	AATAGCAGTGACCCCAAGTACTTTTCTAGCTTG
F262L-MF	GATACCTGCACATTGCATATTTATGGAGAGGAT
F262L-MR	ATCCTCTCCATAAATATGCAATGTGCAGGTATC
G266E-MF	GCACATTTCATATTTATGAAGAGGATCAGGATG
G266E-MR	CATCCTGATCCTCTTCATAAATATGAAATGTGC
K273R-MF	GATCAGGATGCAGTGAGAAAAGCTAGAAGCTTT
K273R-MR	AAAGCTTCTAGCTTTTCTCACTGCATCCTGATC
E280K-MF	GCTAGAAGCTTTCTCAAATTTGCTGAAGATGT
E280K-MR	ACATCTTCAGCAAATTTGAGAAAGCTTCTAGC
P289L-MF	GAAGATGTAATACAAGTTCTAAGGAACTTAGTAGGC
P289L-MR	GCCTACTAAGTTCCTTAGAACTTGTATTACATCTTC
I304N-MF	ATGGAAAGCTGAATCAGGAGATTGTGG
I304N-MR	CCACAATCTCCTGATTCAGCTTTCCAT
E323Q-MF	GATTGAGGCTGAAAATCAGAAAAATGTTCCAC
E323Q-MR	GTGGAACATTTTTCTGATTTTCAGCCTCAATC
L338P-MF	GCCACCAAATTCCCCTCCTTCCAATAAT
L338P-MR	ATTATTGGAAGGAGGGGAATTTGGTGGC
N341S-MF	TCCCTTCCTTCCAGTAATTCAAGGGTTGG
N341S-MR	CCAACCCTTGAATTACTGGAAGGAAGGGA
R344S-MF	TCCAATAATTCAAGCGTTGGACCTAATGC
R344S-MR	GCATTAGGTCCAACGCTTGAATTATTGGA
V345A-MF	CAATAATTCAAGGGCTGGACCTAATGCCC
V345A-MR	GGGCATTAGGTCCAGCCCTTGAATTATTG
G346E-MF	TAATTCAAGGGTTGAACCTAATGCCCCAG
G346E-MR	CTGGGGCATTAGGTTCAACCCTTGAATTA
E352G-MF	CTAATGCCCCAGAAGGAAAAAAACATTTAGATAT
E352G-MR	ATATCTAAATGTTTTTTTCCTTCTGGGGCATTAG
S370N-MF	CATTTTTCTCAACCTAACAATACAAAAGTCCAGAGG
S370N-MR	CCTCTGGACTTTTGTATTGTTAGGTTGAGAAAAATG
R375M-MF	GTACAAAAGTCCAGATGGTGTTAGTGGCTTC
R375M-MR	GAAGCCACTAACACCATCTGGACTTTTGTAC
W395*-MF	GAACTCAAGGCTTAGCAGGGTATGGTAC
W395*-MR	GTACCATACCCTGCTAAGCCTTGAGTTC
G397S-MF	CAAGGCTTGGCAGAGTATGGTACCATTT
G397S-MR	AAATGGTACCATACTCTGCCAAGCCTTG
D408G-MF	TGGGAACAAAGGGCAGCATCGCTAATG
D408G-MR	CATTAGCGATGCTGCCCTTTGTTCCCA
A411T-MF	CAAAGGACAGCATCACTAATGCCACTGTT
A411T-MR	AACAGTGGCATTAGTGATGCTGTCCTTTG
Y419C-MF	CACTGTTCTTTTGGATTGTCACCTGAACTATTTAAAGG
Y419C-MR	CCTTTAAATAGTTCAGGTGACAATCCAAAAGAACAGTG
Y423fs-MF	TTGGATTATCACCTGAACTTTAAAGGAAGTAGACC
Y423fs-MR	GGTCTACTTCCTTTAAAGTTCAGGTGATAATCCAA
D428H-MF	CTATTTAAAGGAAGTACACCAGTTGCGTTTGG
D428H-MR	CCAAACGCAACTGGTGTACTTCCTTTAAATAG
R442Q -MF	GATGAGCAGTTGCAACAGATTGGAGCT
R442Q -MR	AGCTCCAATCTGTTGCAACTGCTCATC
K459*-MF	CGTACAGATAAGGAATAAAGCTATGTGACTGATGAT
K459*-MR	ATCATCAGTCACATAGCTTTATTCCTTATCTGTACG
T461C-MF	GATAAGGAAAAAAGCTGTGTGACTGATGATGGTC
T461C-MR	GACCATCATCAGTCACACAGCTTTTTTCCTTATC
G470S-MF	TGGTCAAGGAATGAGTCGAGGTAGTAGAC
G470S-MR	GTCTACTACCTCGACTCATTCCTTGACCA
R471*-MF	TCAAGGAATGGGTTGAGGTAGTAGACCTT
R471*-MR	AAGGTCTACTACCTCAACCCATTCCTTGA
G480E-MF	TACAGAAATAGGGAGCACGGCAGACG
G480E-MR	CGTCTGCCGTGCTCCCTATTTCTGTA
R484C-MF	GGCACGGCAGATGCGGTCCTGGATAT
R484C-MR	ATATCCAGGACCGCATCTGCCGTGCC
Y488C-MF	CGCGGTCCTGGATGTACTTCAGGAACT
Y488C-MR	AGTTCCTGAAGTACATCCAGGACCGCG
Syn-524MF	GAGAGGGAGAGTTTCCTGCGCAGAG
Syn-524MR	CTCTGCGCAGGAAACTCTCCCTCTC
L526M-MF	GAGGGAGAGCTTCATGCGCAGAGGAG
L526M-MR	CTCCTCTGCGCATGAAGCTCTCCCTC
R527S-MF	GAGAGCTTCCTGAGCAGAGGAGAC
R527S-MR	GTCTCCTCTGCTCAGGAAGCTCTC
R527H-MF	AGAGCTTCCTGCACAGAGGAGACG
R527H-MR	CGTCTCCTCTGTGCAGGAAGCTCT
1622Del-MF	CGTGGAGGGGGAGGAAGAGGACGTGGAGGAGGCTTCAAAGGAAACG
1622Del-MR	CGTTTCCTTTGAAGCCTCCTCCACGTCCTCTTCCTCCCCCTCCACG
R546C-MF	GGAGGAAGAGGATGTGGAGGAGGCTT
R546C-MR	AAGCCTCCTCCACATCCTCTTCCTCC
Syn-547MF	GAAGAGGACGTGGGGGAGGCTTCAAAGG
Syn-547MR	CCTTTGAAGCCTCCCCCACGTCCTCTTC
K551R-MF	GGAGGAGGCTTCAGAGGAAACGACGATC
K551R-MR	GATCGTCGTTTCCTCTGAAGCCTCCTCC
D555N-MF	CAAAGGAAACGACAATCACTCCCGAAC
D555N-MR	GTTCGGGAGTGATTGTCGTTTCCTTTG
R564H-MF	GATAATCGTCCACATAATCCAAGAGAGGC
R564H-MR	GCCTCTCTTGGATTATGTGGACGATTATC
G576R-MF	GAAGAACAACAGATAGATCCCTTCAGATCAG
G576R-MR	CTGATCTGAAGGGATCTATCTGTTGTTCTTC
C584Y-MF	CAGATCAGAGTTGACTACAATAATGAAAGGAGT
C584Y-MR	ACTCCTTTCATTATTGTAGTCAACTCTGATCTG
R606C-MF	GTAGTCGGCTGTGCACGGGTAAAGAT
R606C-MR	ATCTTTACCCGTGCACAGCCGACTAC
T607M-MF	TCGGCTGCGCATGGGTAAAGATCG
T607M-MR	CGATCTTTACCCATGCGCAGCCGA
D610G-MF	CGCACGGGTAAAGGTCGTAACCAGAAG
D610G-MR	CTTCTGGTTACGACCTTTACCCGTGCG
R611C-MF	CACGGGTAAAGATTGTAACCAGAAGAAAG
R611C-MR	CTTTCTTCTGGTTACAATCTTTACCCGTG
R611L-MF	CACGGGTAAAGATCTTAACCAGAAGAAAG
R611L-MR	CTTTCTTCTGGTTAAGATCTTTACCCGTG
Syn-619MF	GAAGAAAGAGAAGCCAGATAGCGTGGATGGTC
Syn-619MR	GACCATCCACGCTATCTGGCTTCTCTTTCTTC
Syn-103MF	GTGATGCAACTTATAATGAAATTGTCACAATTG
Syn-103MR	CAATTGTGACAATTTCATTATAAGTTGCATCAC
Syn-138MF	CAGAAGACTTACGACAAATGTGTGCC
Syn-138MR	GGCACACATTTGTCGTAAGTCTTCTG
Syn-217MF	GCAGCTTGCCTCAAGATTTCATGAAC
Syn-217MR	GTTCATGAAATCTTGAGGCAAGCTGC
Syn-265MF	CTGCACATTTCATATTTACGGAGAGGATCAGG
Syn-265MR	CCTGATCCTCTCCGTAAATATGAAATGTGCAG
Syn-310MF	GAGATTGTGGACAAATCAGGAGTTGTGAGG
Syn-310MR	CCTCACAACTCCTGATTTGTCCACAATCTC
Syn-444MF	GCAGTTGCGACAGATAGGAGCTAGTTCTAG
Syn-444MR	CTAGAACTAGCTCCTATCTGTCGCAACTGC
Syn-457MF	CCAAATCGTACAGATAAAGAAAAAAGCTATGTGAC
Syn-457MR	GTCACATAGCTTTTTTCTTTATCTGTACGATTTGG

## Sheet: S1-4
Sequence of qPCR primers related to Supplementary Fig.1a and Supplementary Fig.4d.
H1-2-qF	CGGTGCTTCTGGCTCCTTTA
H1-2-qR	TCTTAGGTTTGGTTCCGCCC
H2BC21-qF	GCCTGAACCGGCAAAATCCG
H2BC21-qR	CTTCTGGGCTTTGGTGACGG
H3C2-qF	AGACAGCTCGGAAATCCACC
H3C2-qR	AACGGTGAGGCTTTTTCACG
H4C5-qF	GGGTGTCAAGCGCATTTCTG
H4C5-qR	GCTCCGTGTAAGTCACAGCA
UBE3A-qF	TGGTGGTGATAGTGTCCCAGT
UBE3A-qR	CAGCCCACATGTCCCCAATA
PPP2CA-qF	CGTTGTGGTAACCAAGCTGC
PPP2CA-qR	GTGCTGGGTCAAACTGCAAG
MAP1B-qF	AGCAACATGCAGGTGACACT
MAP1B-qR	GCTGCTGCTTGCTAAAACCA
NF1-qF	GCATTCCCCAGGAATCGACA
NF1-qR	AAACTGCCAGCGCTTCTTTG
ERCC002-qF	ACGTGGGTCCATCAGTTGTC
ERCC002-qR	CCTCGGGGAGCTTGATTGAT
